# Supplementary material for: Hydroclimate intensification aided Early Holocene Arctic glacier survival
Source: Research Square preprint supplement (doi:10.21203/rs.3.rs-3970184/v1), 2024-03-04
Supplement: Supplementary file 1 [file b886857681b61ddd9db299b3.docx]

**Supplementary information**

**
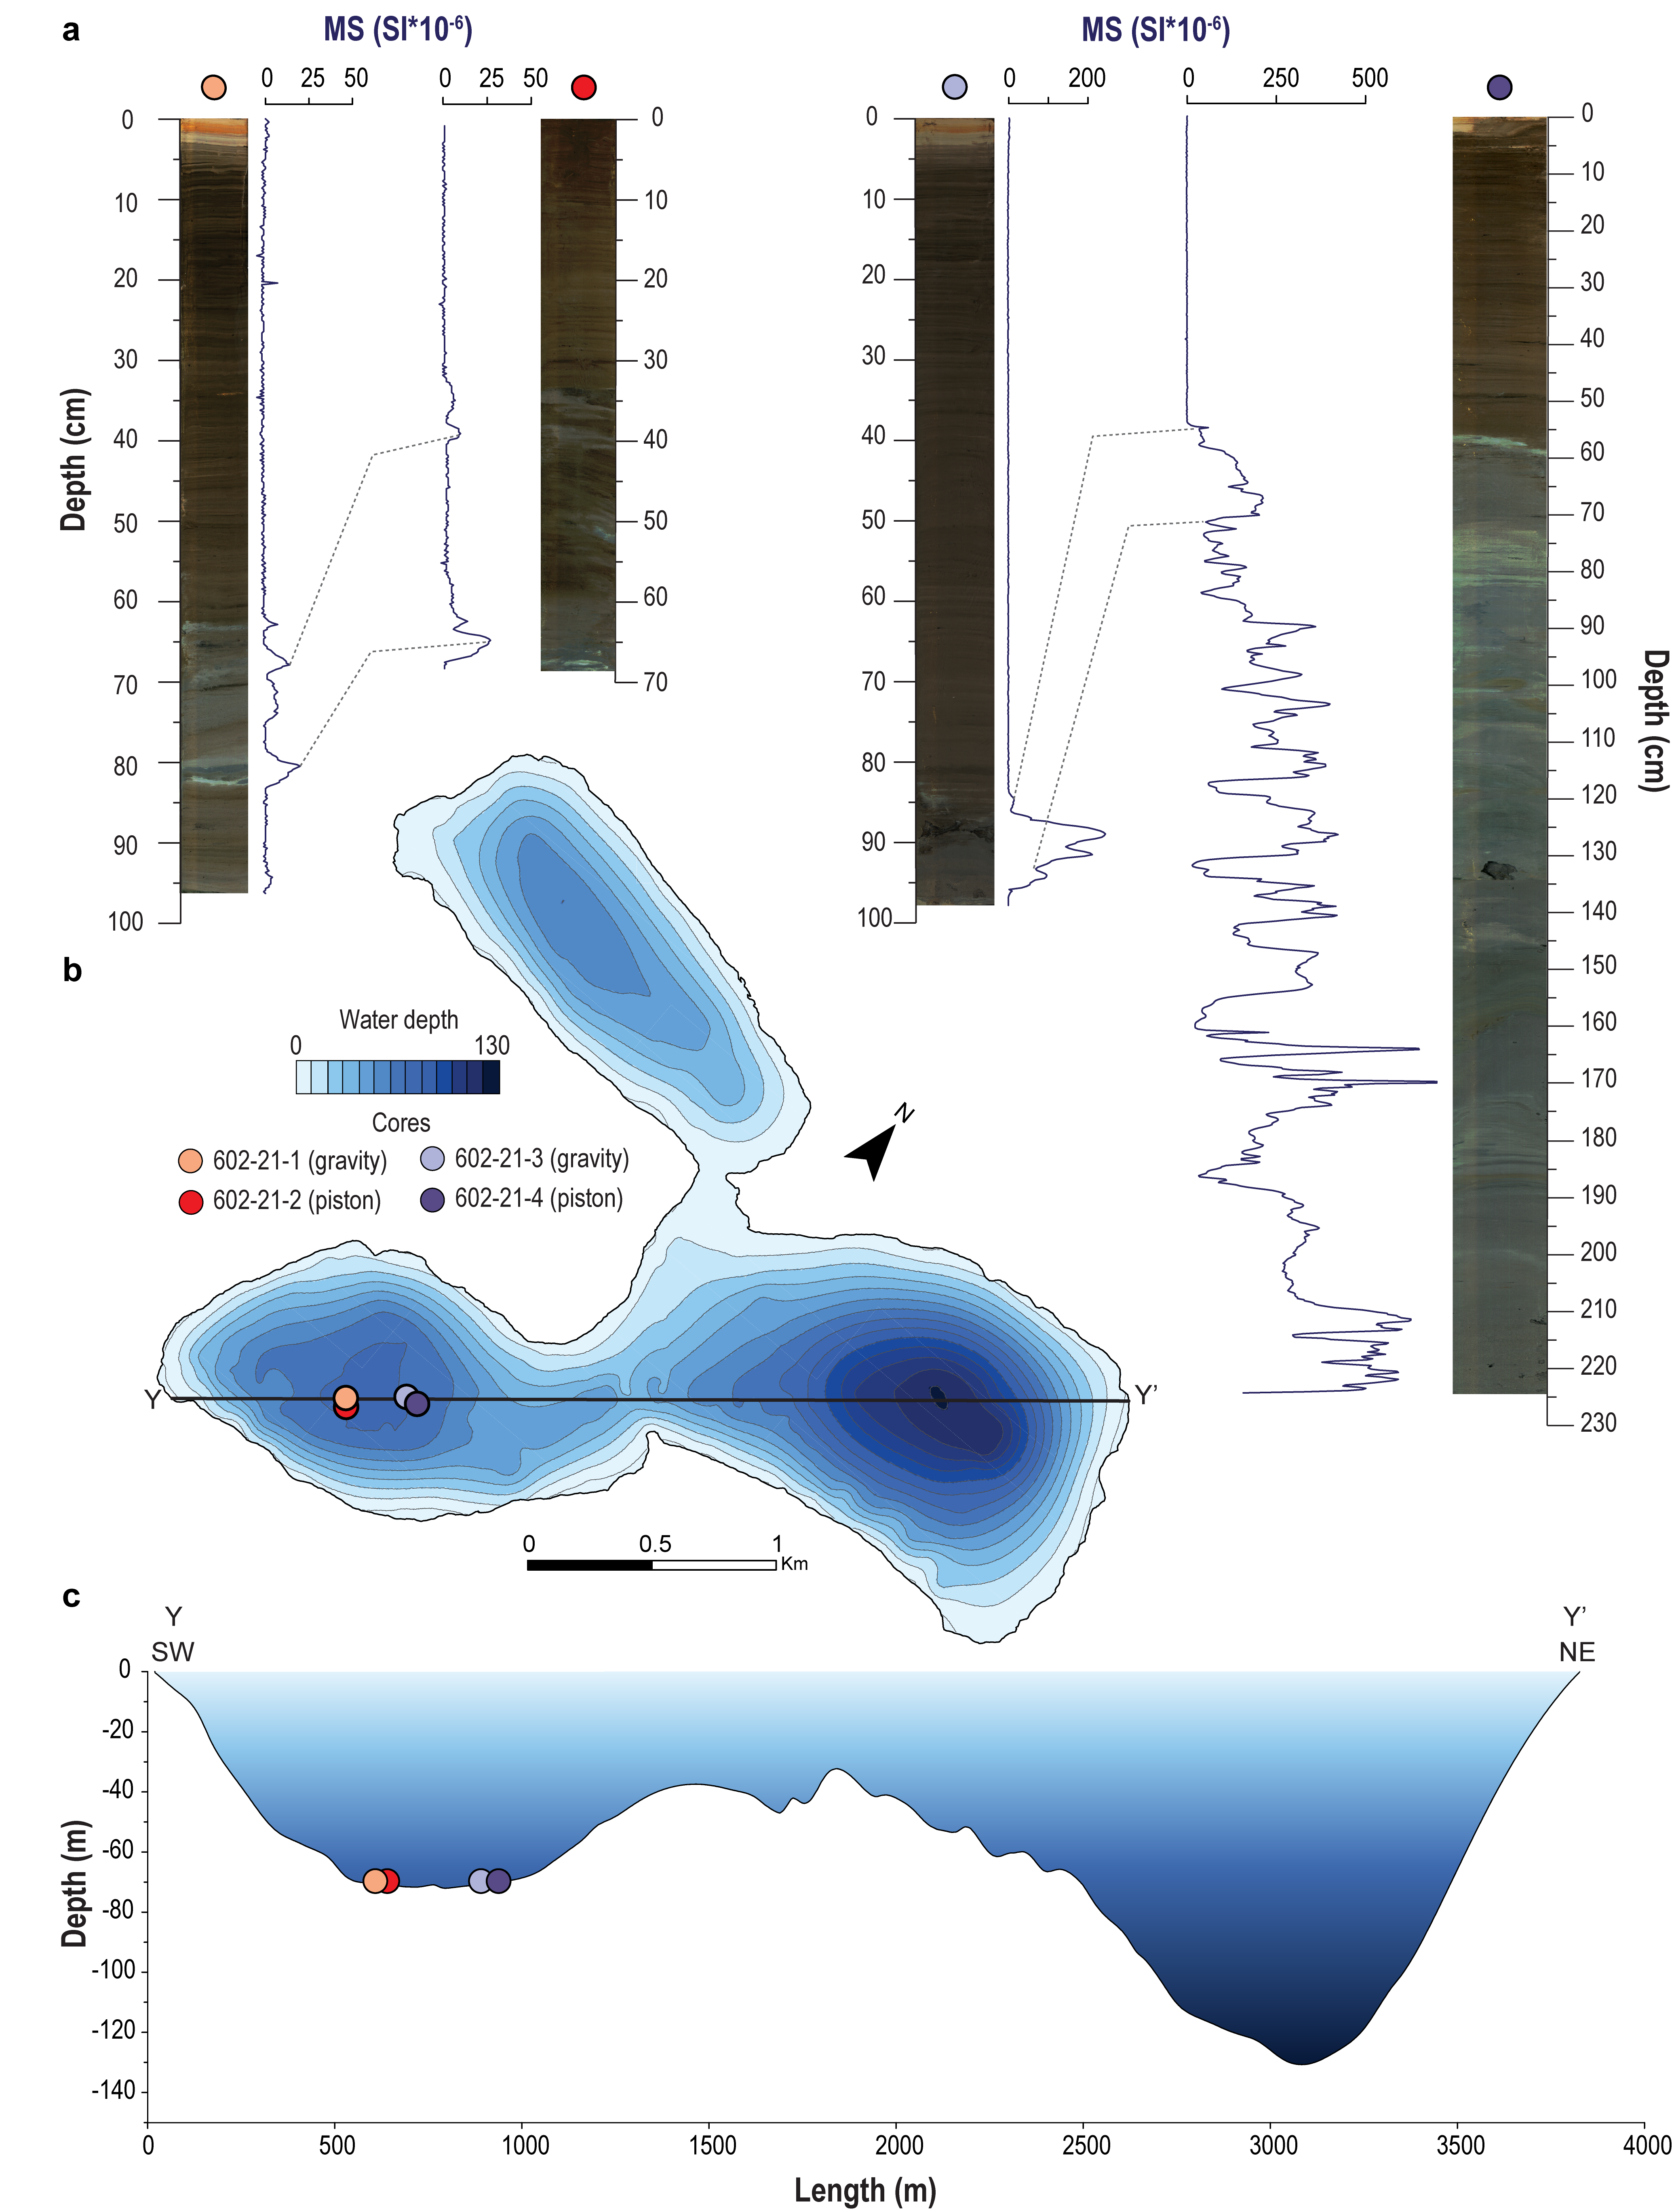
**

**Supplementary Figure 1. Bathymetric survey of Lake Lakssjøen.** **a:** MS-based alignment of the paired Lakssjøen gravity and piston cores. **b:** bathymetric map of Lake Lakssjøen, showing our coring location. **c: S**W-NEtrending bathymetric profile that crosses coring locations (dots).


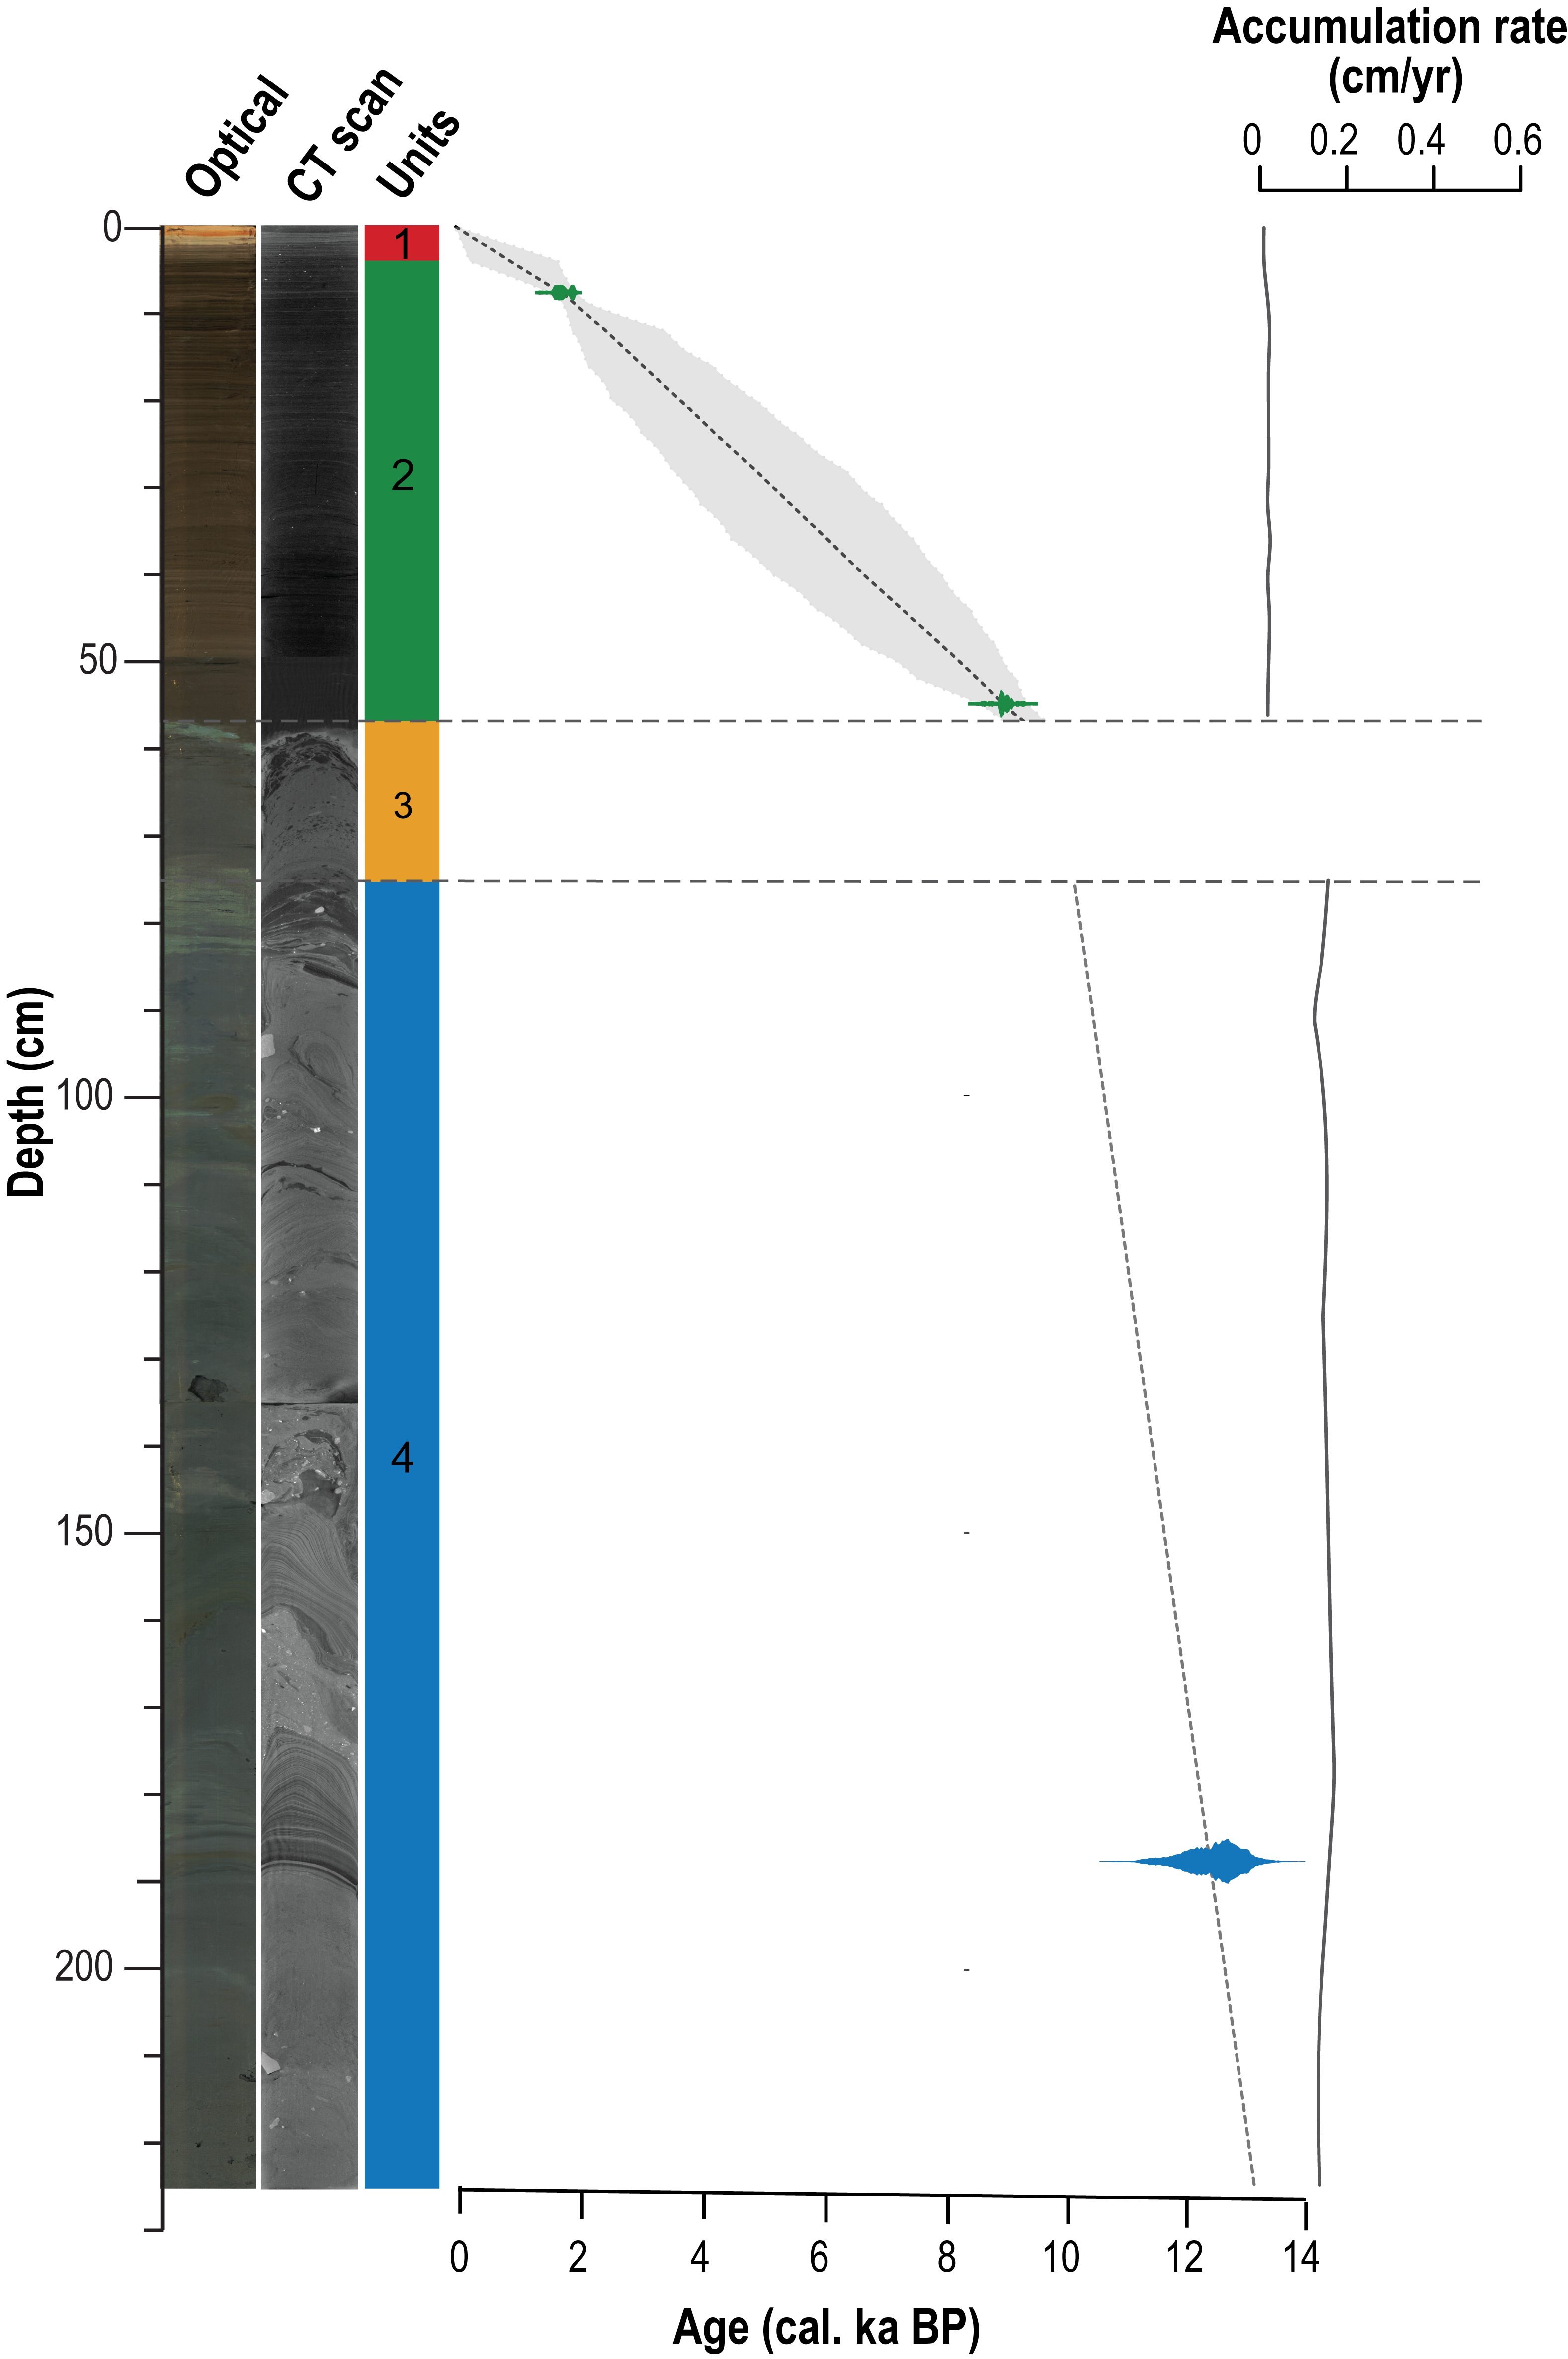


**Supplementary Figure 2. Lakssjøen chronology.** The black stippled line shows the weighted mean, while grey shading delimits the 95% confidence limits of our model. On the far left, we show optical image and CT imagery, as well as a log with unit divisions. 14C sample age distributions are color-coded according to the units. Dashed lines mark the extent of an event deposit. Modelled accumulation rates are plotted on the right.


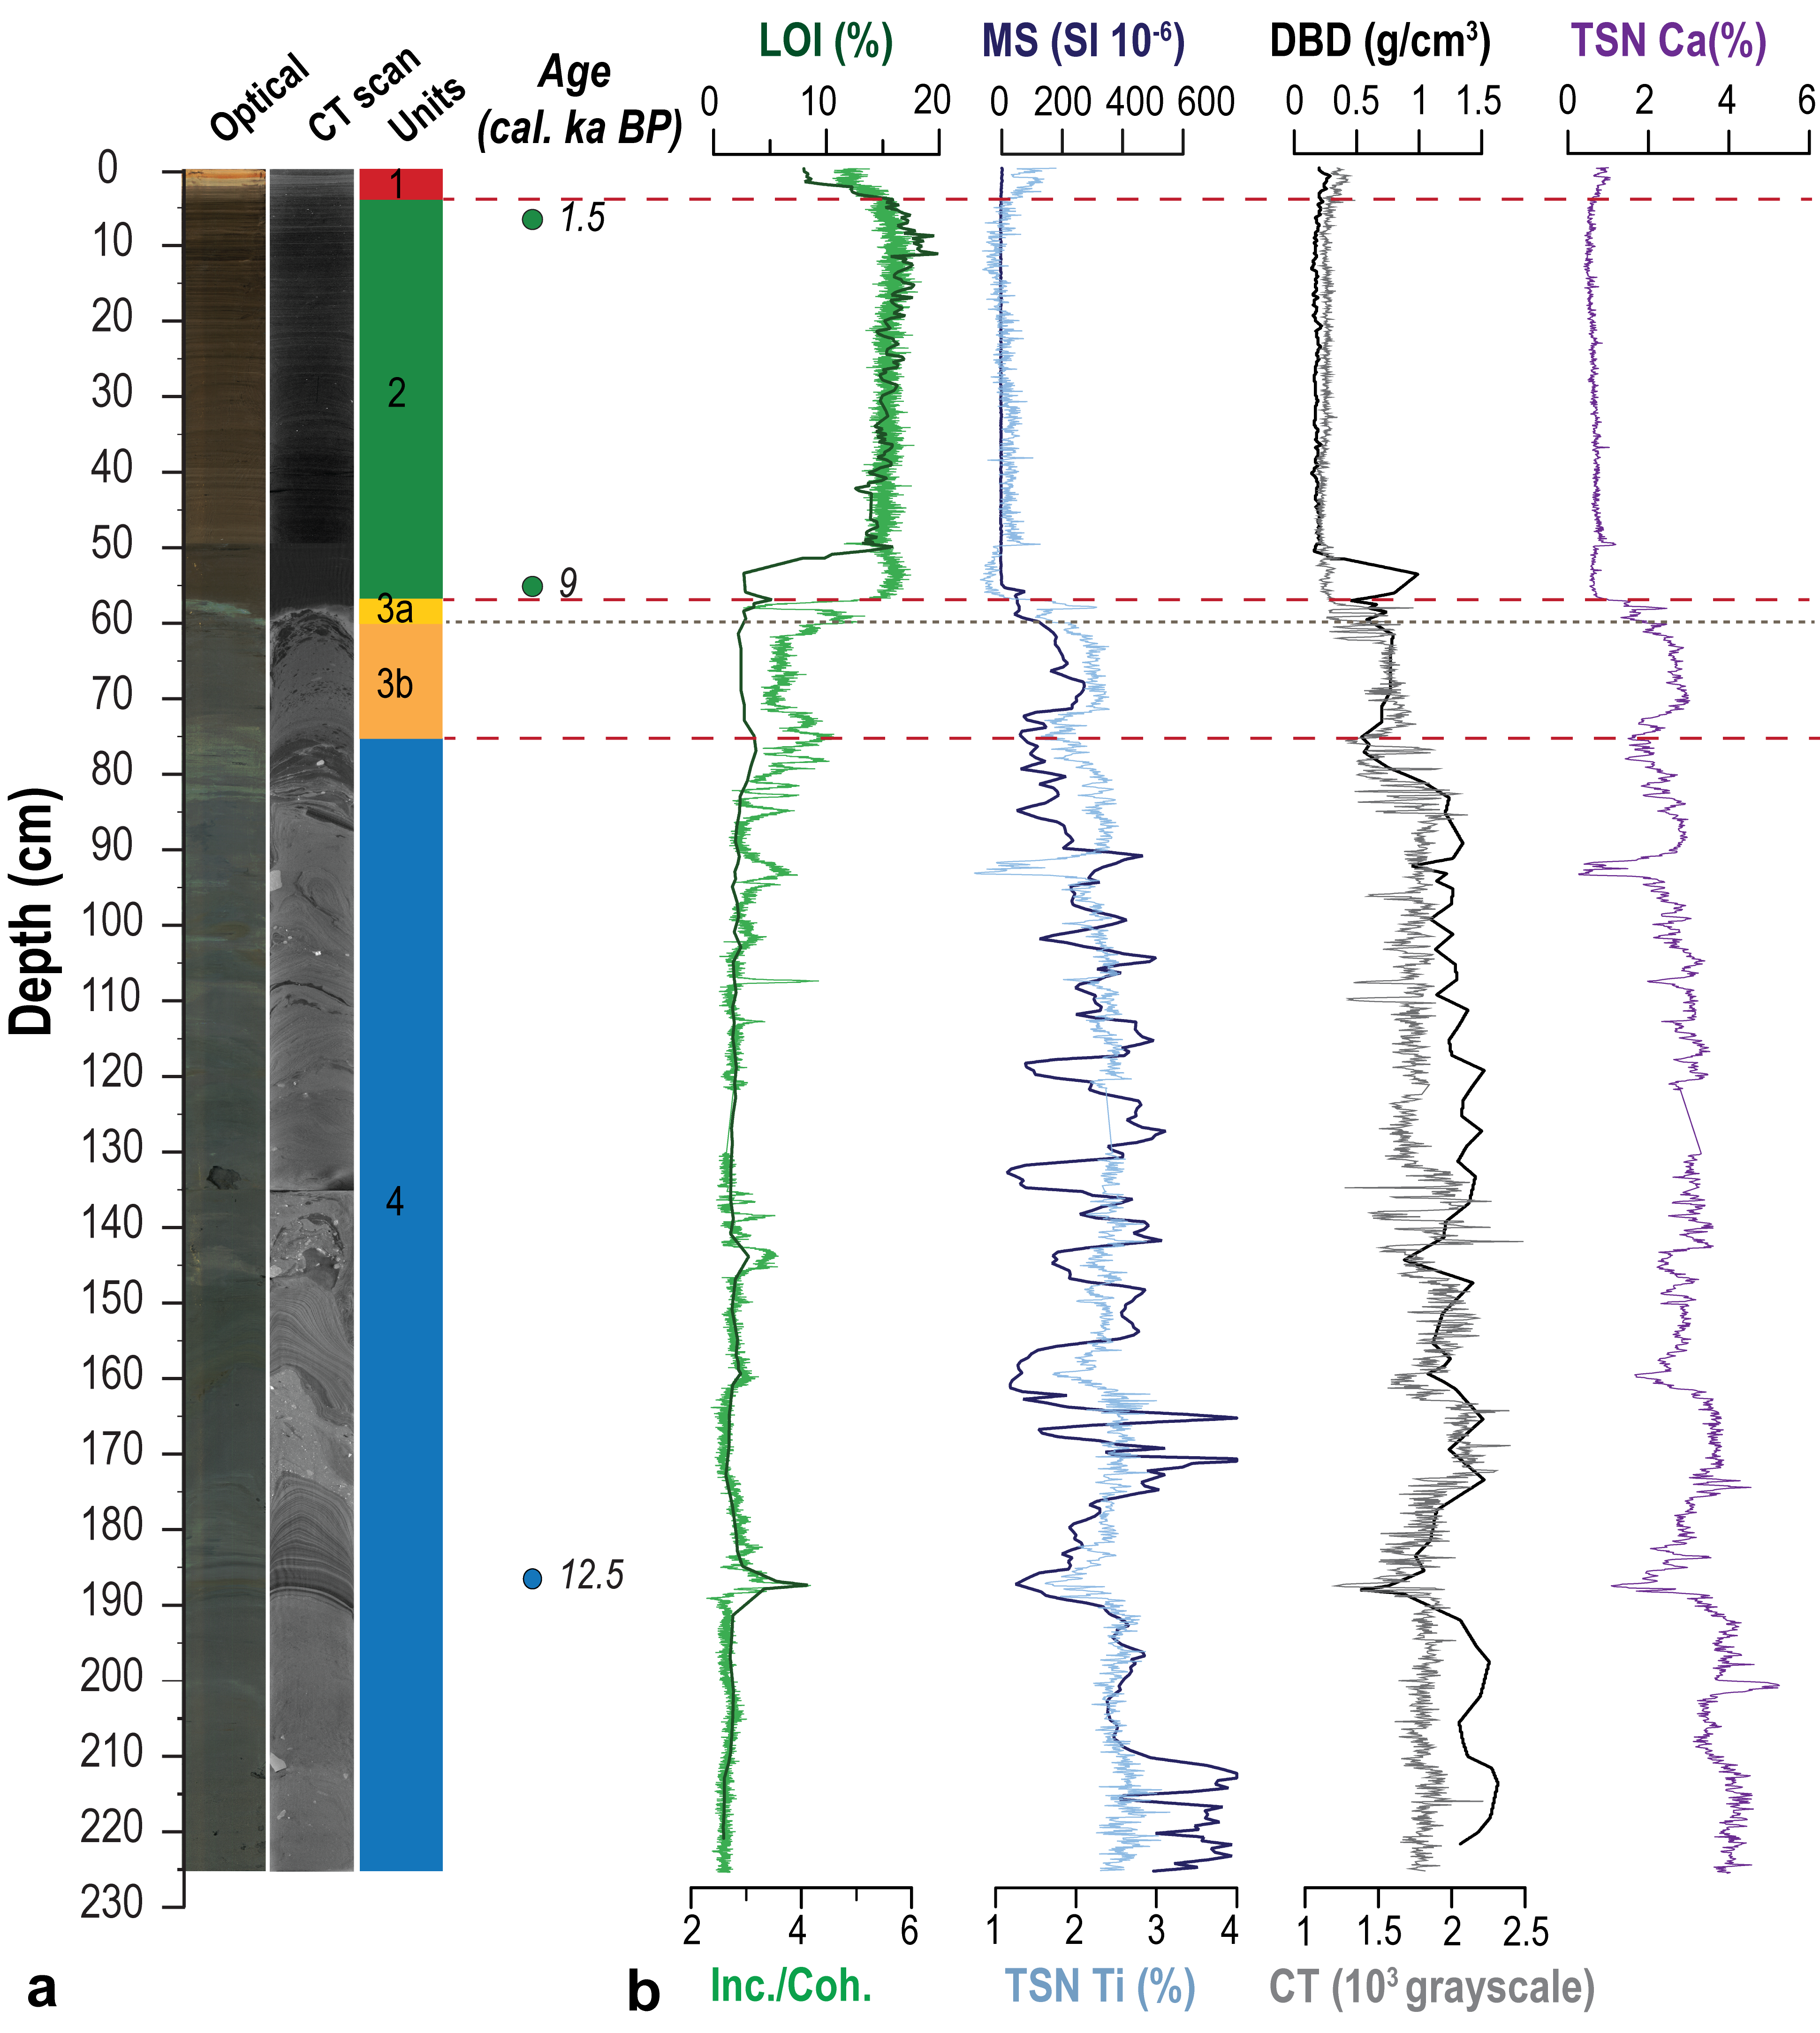


**Supplementary Figure 3. Lakssjøen stratigraphy**. **a:** From left to right - optical and CT imagery of the sedimentary record, (sub)units classification and depth placement of 14C dating samples**. b:** organic content—reflected by Loss on Ignition (LOI) % and XRF incoherent/coherent scattering (Inc./Coh.) ratios, minerogenic indicators – MS and Titanium (Ti) counts, density - reflected by Dry Bulk Density (DBD) values (bottom) and CT greyscale values (top), and provenance indicator Calcium (Ca).


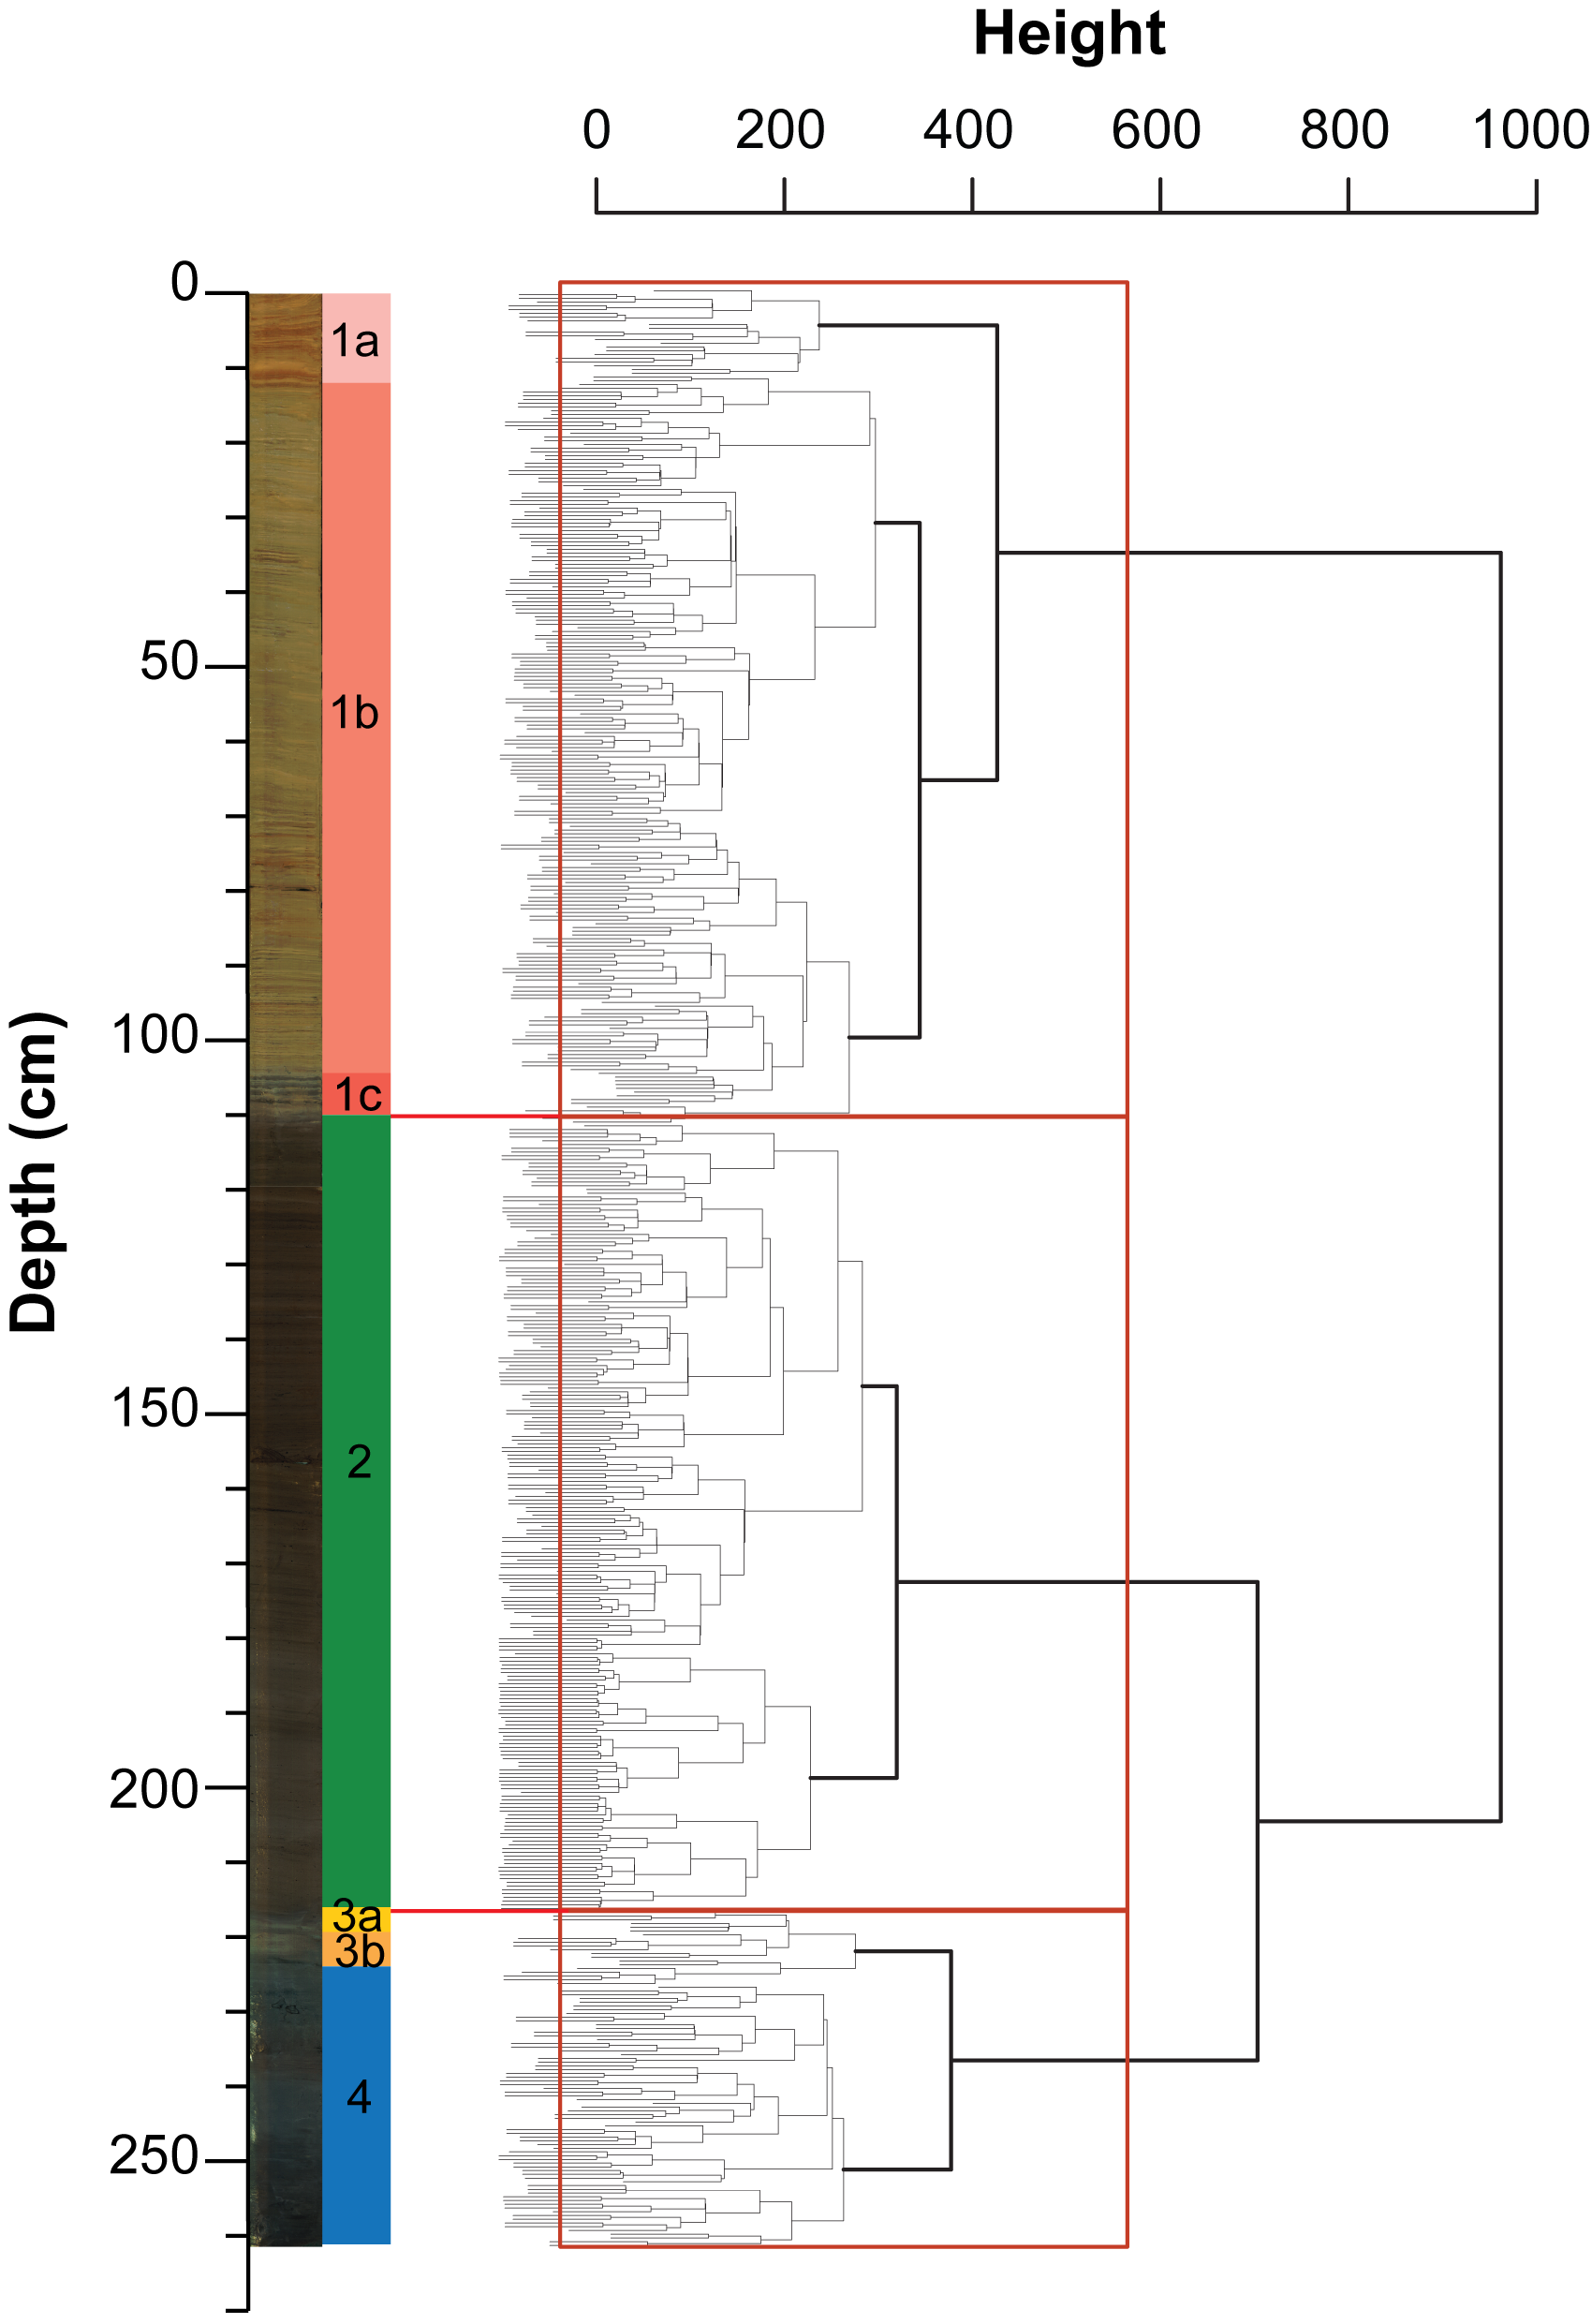


**Supplementary Figure 4. Berglivatnet cluster analysis**. Dendrogram showing the relationship between samples and their separation into (sub)units.


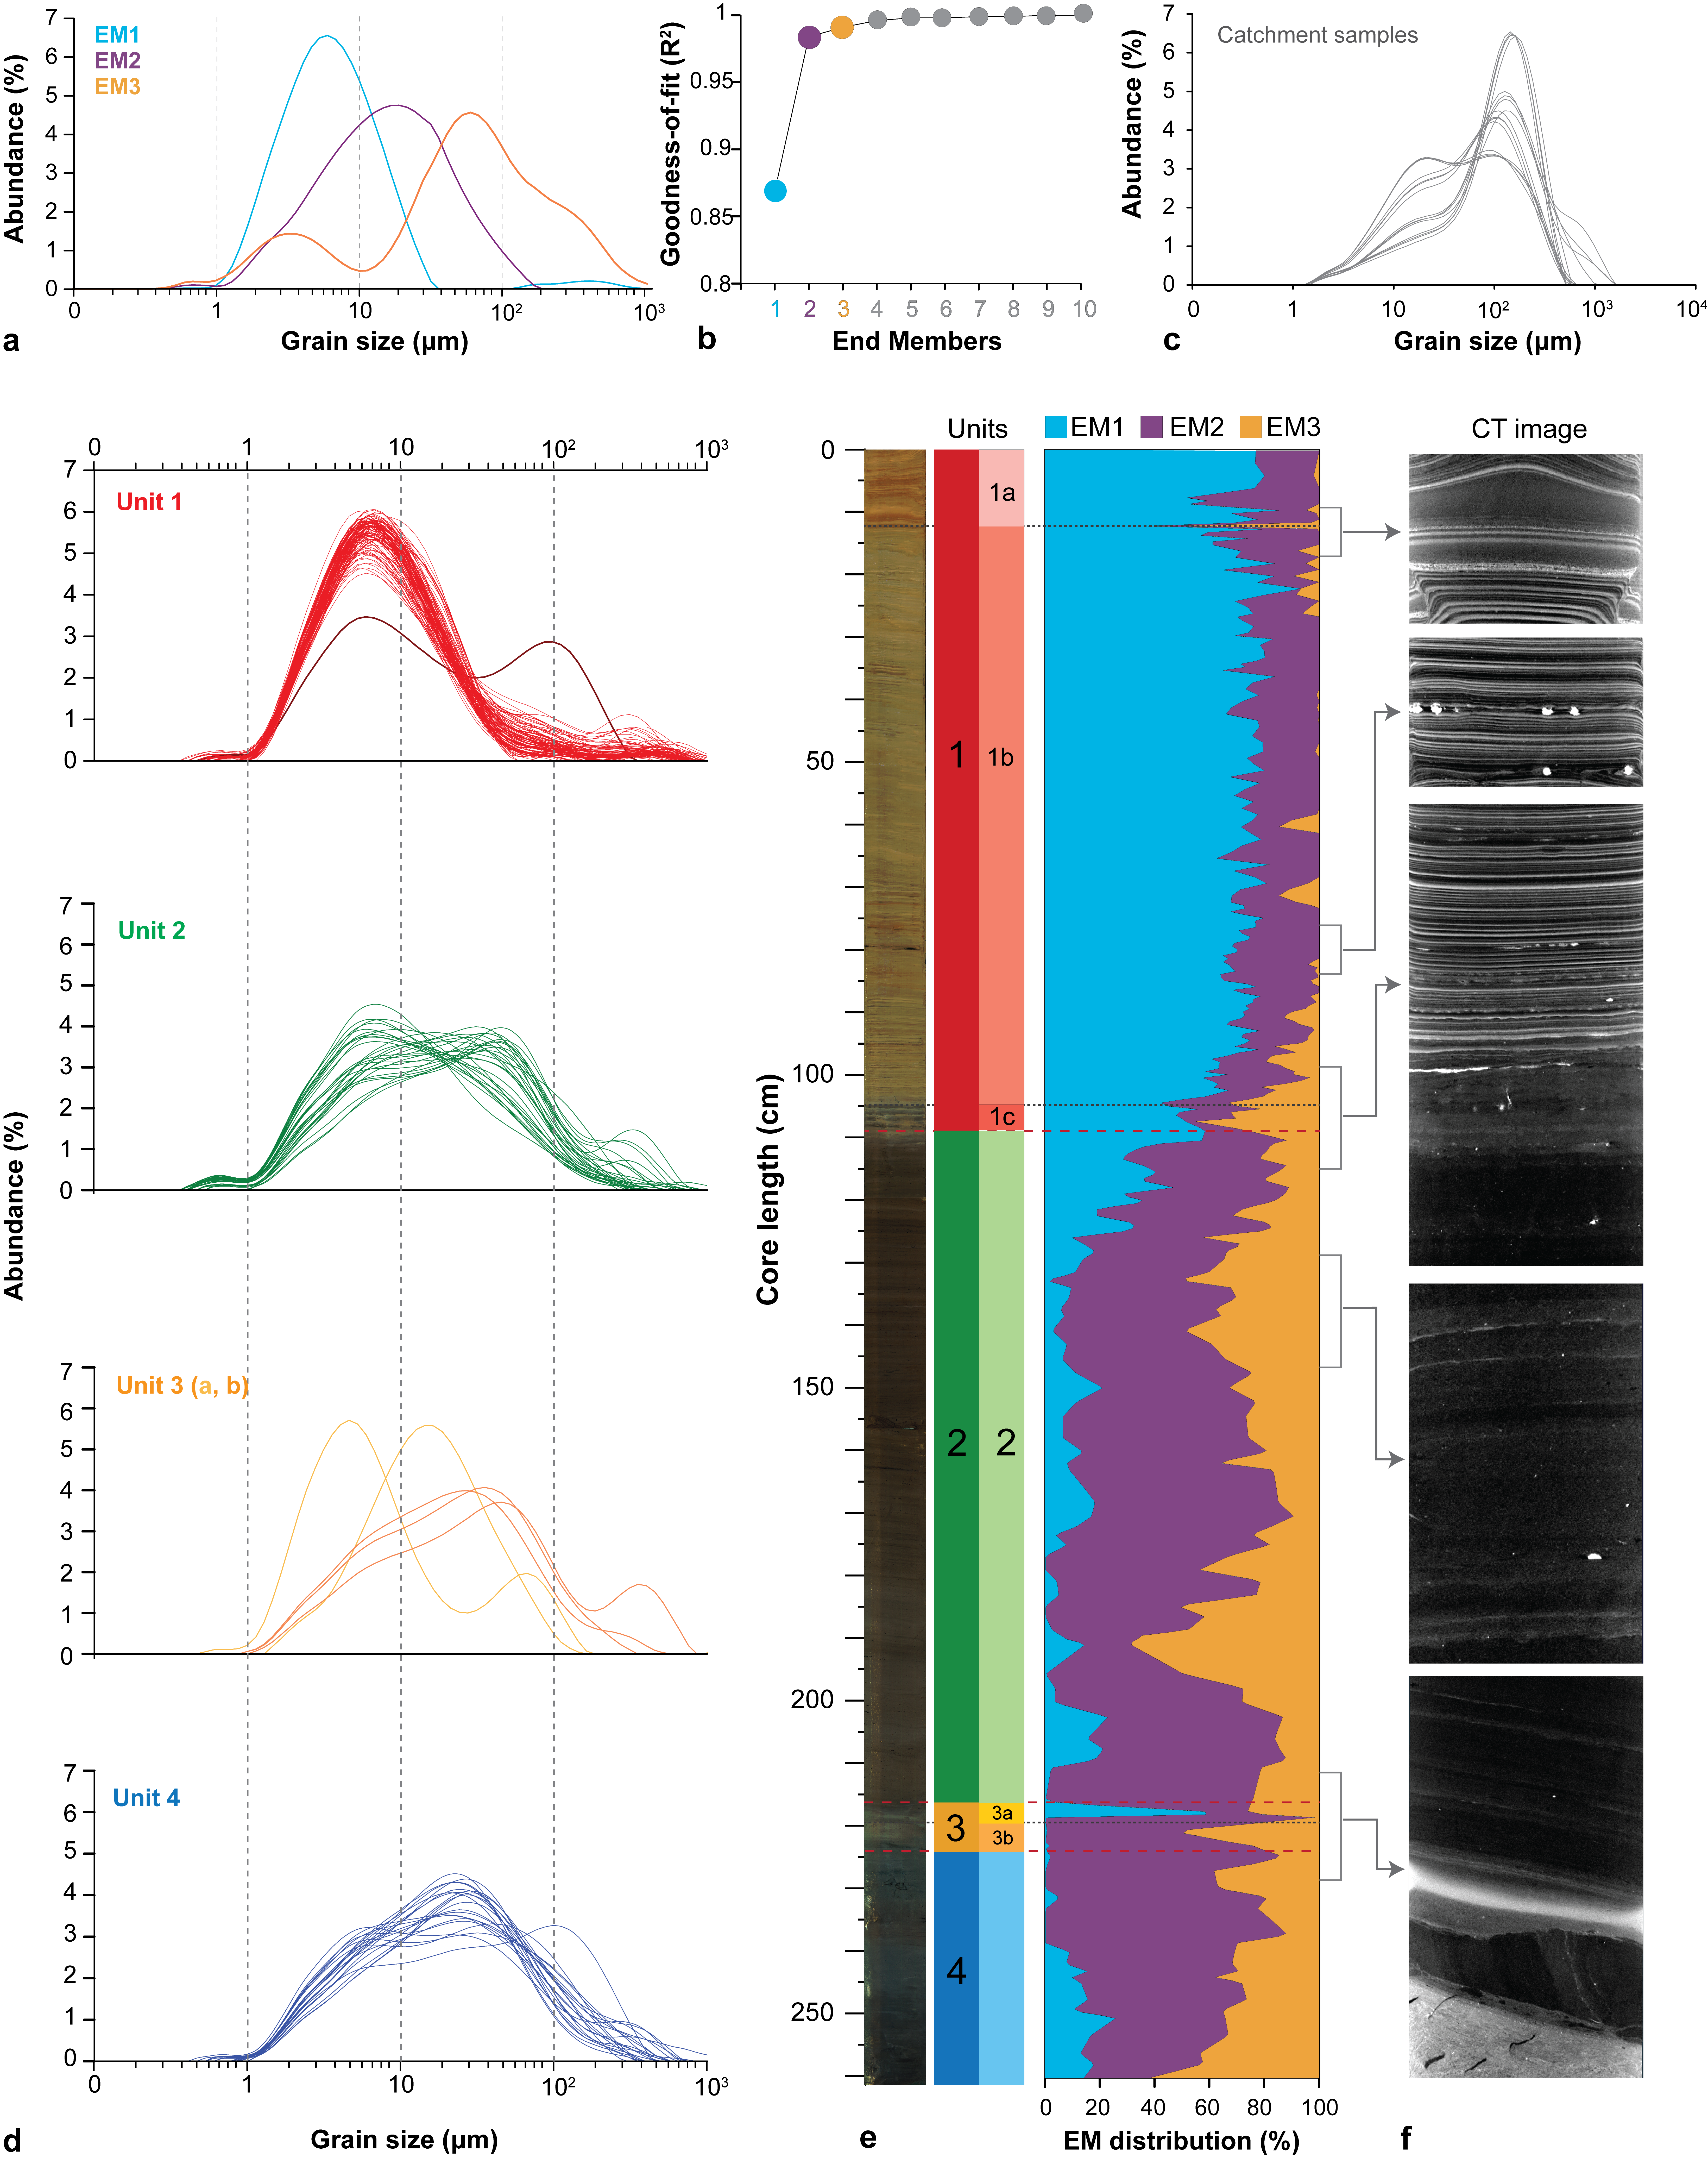


**Supplementary Figure 5. Berglivatnet - detailed view of grain size EMMA results and CT close-ups** **a:** Grain size distribution of relevant end members. **b:** Cumulative coefficients of determination (R2: goodness-of-fit) for the 10 EM model that we ran, highlighting the three significant EMs**. c:** Grain size distribution of catchment samples. **d:** Grain size distributions of samples from each unit, colour coded accordingly. **E:** From left to right – optical imagery, (sub)units classification of the sedimentary record and downcore EMMA results. **F:** Zoomed-in images of our CT scans in sections representative for each unit.


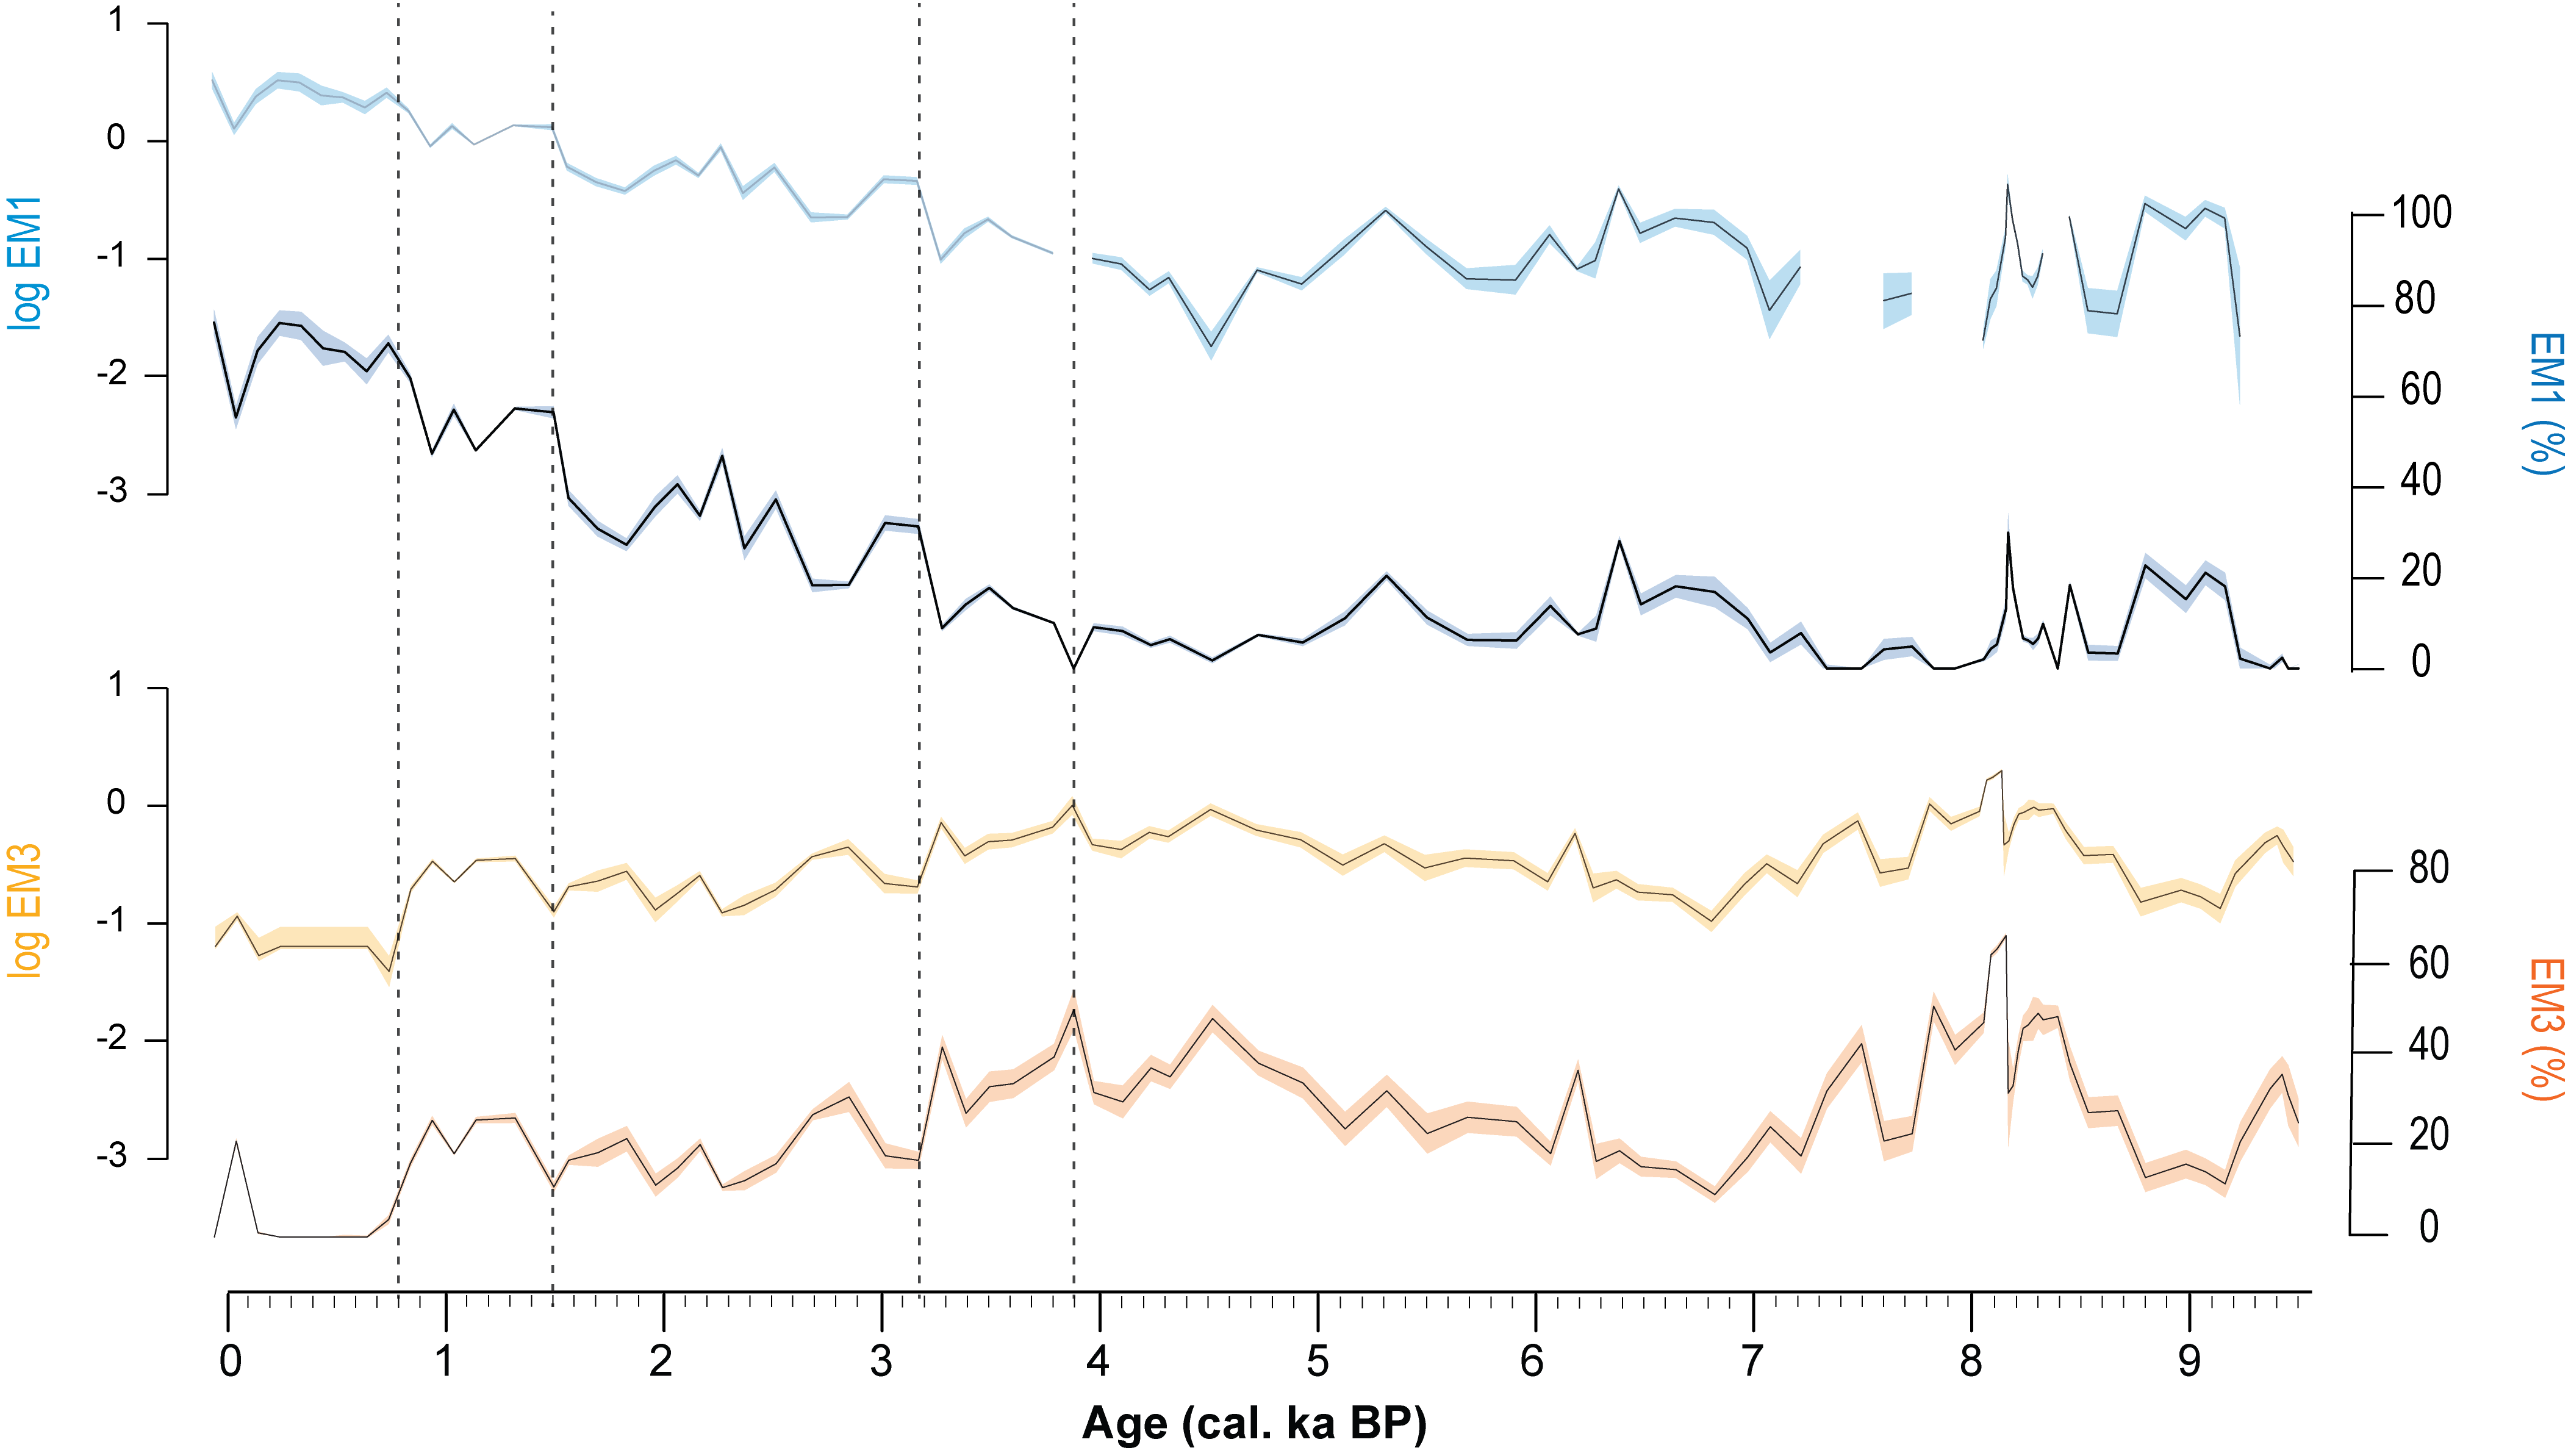


**Supplementary Figure 6. Comparison between percentages and log-ratios for Berglivatnet GS EMMA output.** Coloured shading highlights the analytical uncertainty (2σ) of measurements. Vertical stippled lines mark the location of identified change points.


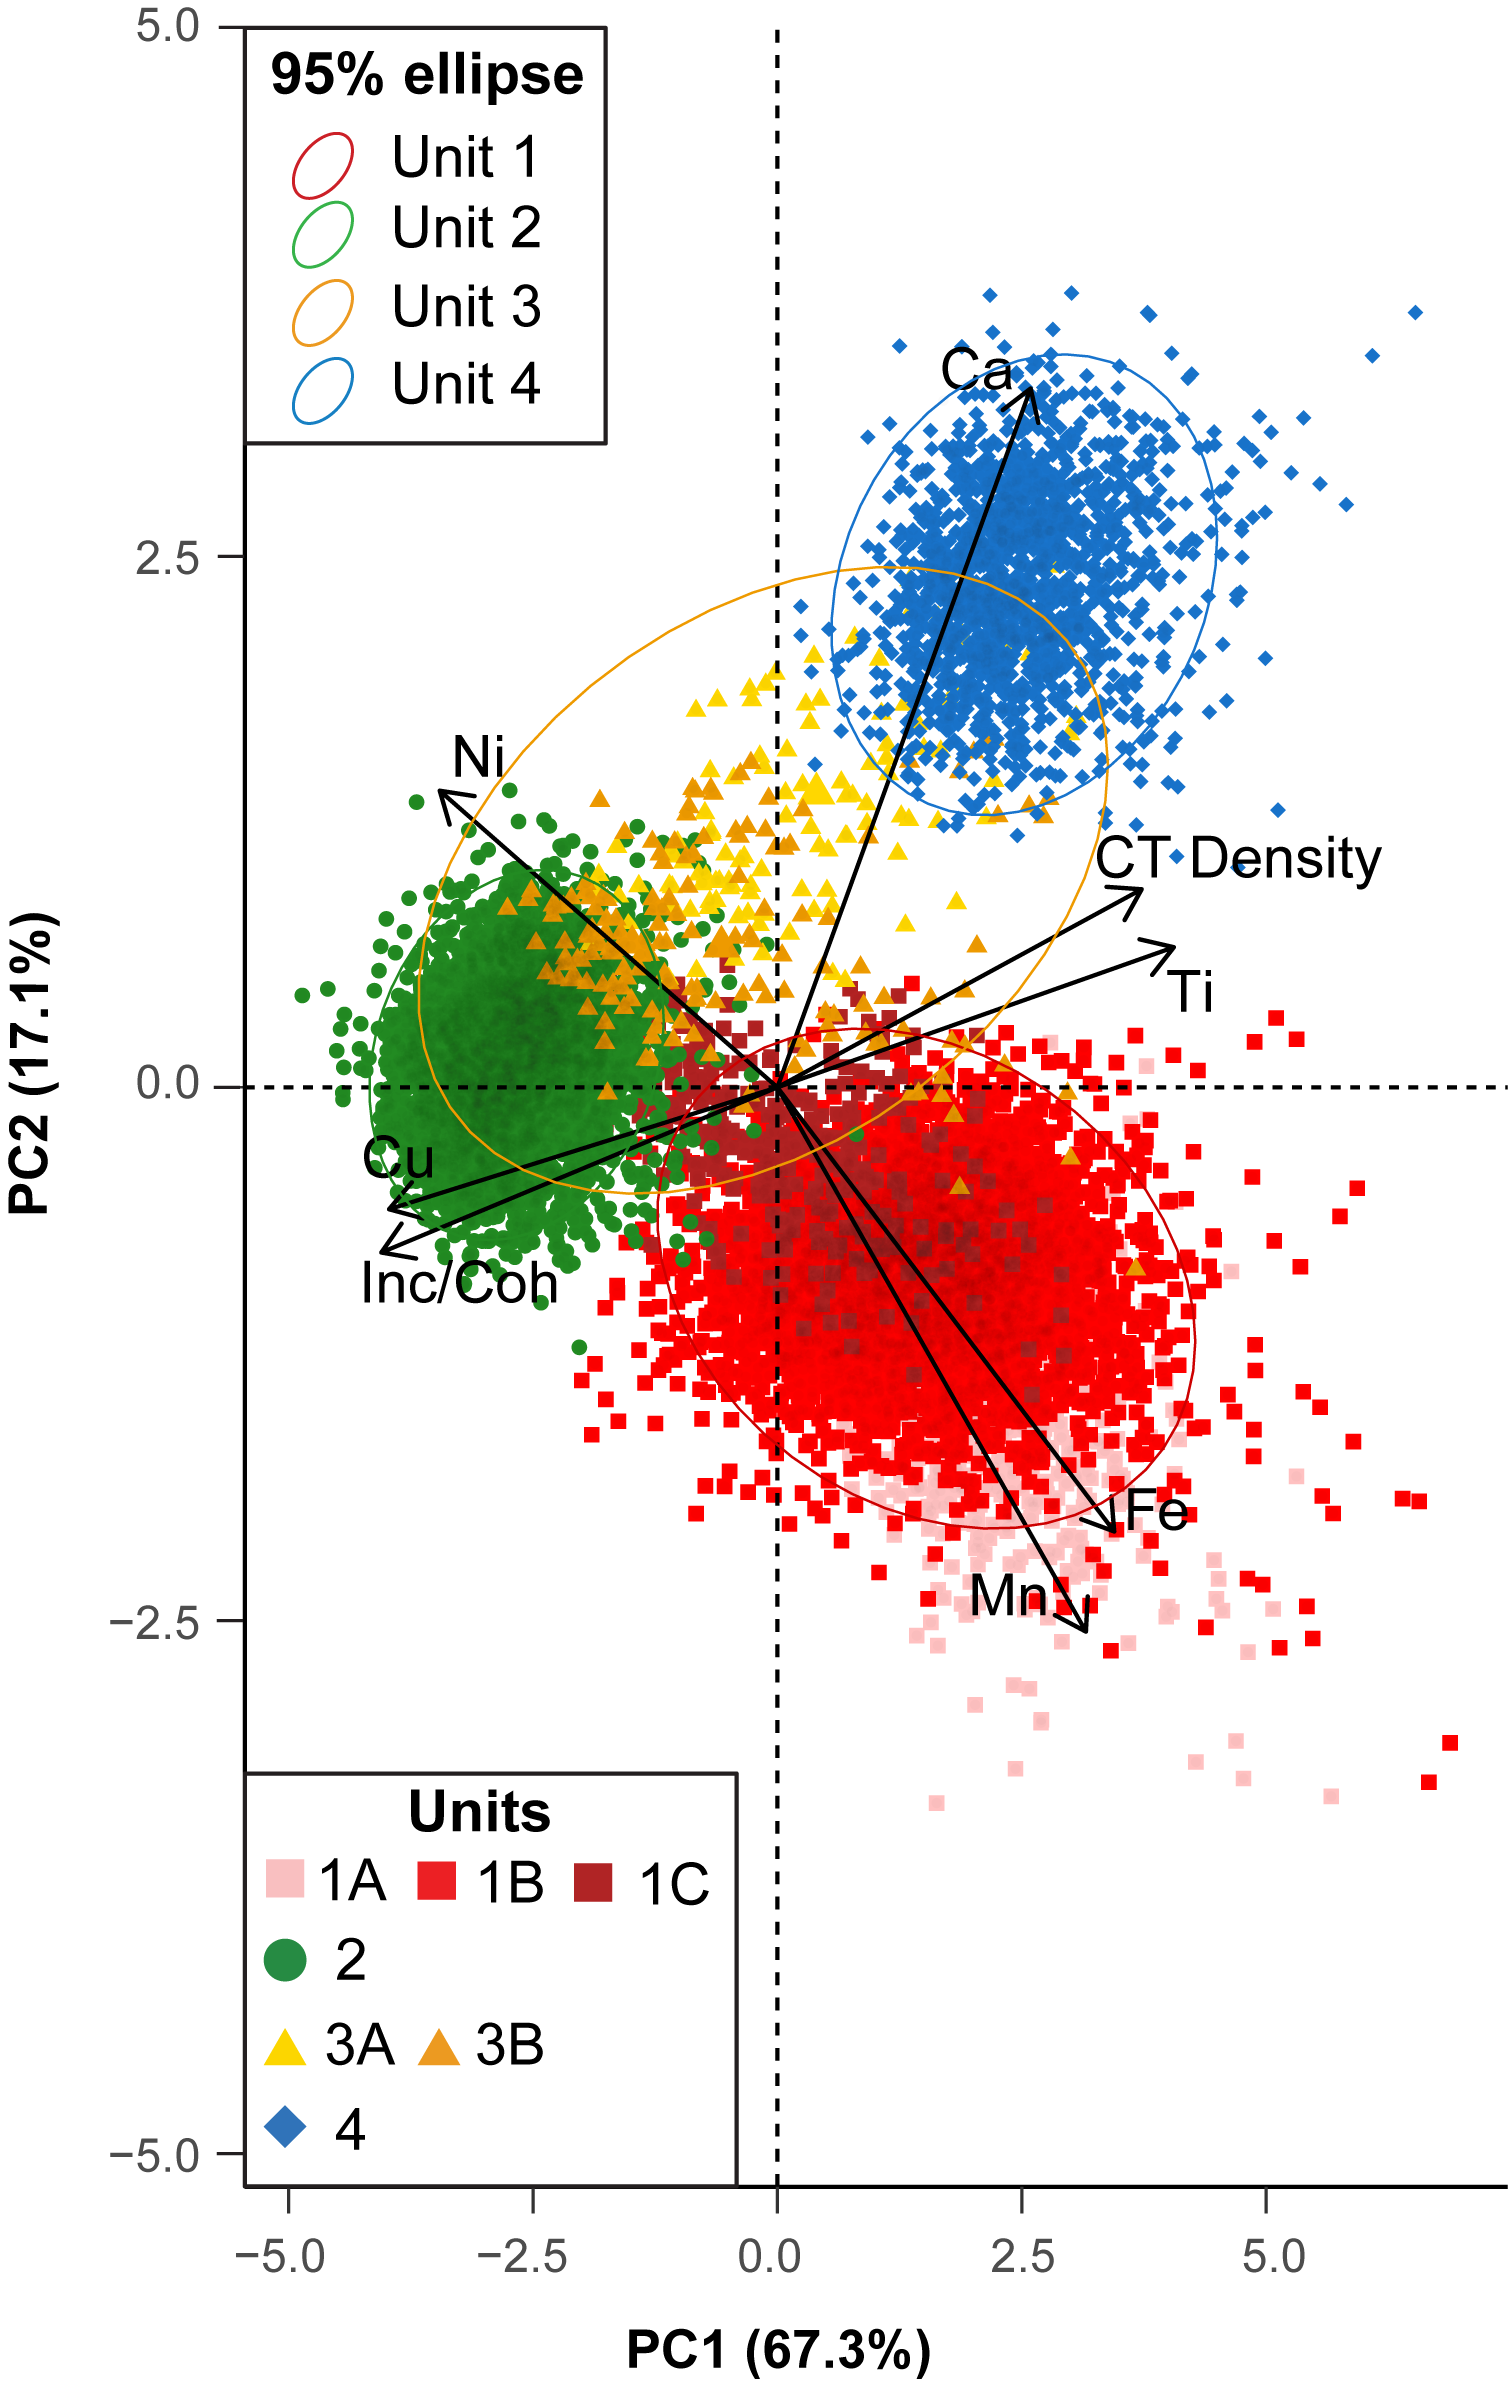


**Supplementary Figure 7. Berglivatnet ordination diagram on log-transformed samples.** Down-core samples and 95% prediction ellipses are coded in colors matching those of the unit subdivision shown in Figs 4 & 5. The vectors (arrows) reflect the confidence scores of selected variables on the two principal components (PCs) with the greatest explanatory power (PC1 & PC2).

| **Core** | **Lab code** | **Dry weight (mg)** | **Composite depth (cm)** | **δ13C‰ V-PDB** | **14C age (uncal.)** | **Min. age (cal. BP)** | **Max. age (cal. BP)** | **Fit (cal. BP)** | **Material** |
| --- | --- | --- | --- | --- | --- | --- | --- | --- | --- |
| 602-21-10 | Ua-75619 | 1.2 | 14 | -26.1 | 143 ± 27 | 5 | 280 | 132 | Terrestrial leaf fragments |
| 602-21-10 | Poz-157382 | 2.8 | 70 | N/A | 400 ± 30 | 327 | 512 | 471 | Betula fragments & terrestrial leaf fragments |
| 602-21-11 | Poz-157383 | 2 | 103 | N/A | 945 ± 30 | 785 | 922 | 850 | Aquatic moss |
| 602-21-11 | Poz-157384 | 2.4 | 103 | N/A | 990 ± 30 | 794 | 956 | 868 | Betula leaves |
| 602-21-10 | Ua-75620 | 2.7 | 104 | -25.6 | 1005 ± 29 | 798 | 957 | 920 | Betula leaf & fragments |
| 602-21-10 | Ua-75621 | 1.2 | 109 | -26.6 | 1444 ± 32 | 1297 | 1378 | 1333 | Betula fragments |
| 602-21-11 | Ua-75622 | 1.4 | 109.5 | -26.3 | 1402 ± 32 | 1283 | 1352 | 1313 | Betula fragments |
| 602-21-11 | Ua-79068 | 3.9 | 133 | -27.9 | 3577 ± 33 | 3727 | 3977 | 3878 | Betula fragments |
| 602-21-11 | Poz-157385 | 4.1 | 178 | N/A | 6510 ± 40 | 7323 | 7506 | 7408 | Betula fragments |
| 602-21-11 | Ua-75623 | 2.9 | 215.5 | -26.6 | 8488 ± 35 | 9458 | 9538 | 9503 | Terrestrial leaf fragments |
| 602-21-11 | Poz-157339 | 2.1 | 222.5 | N/A | 9380 ± 70 | 10306 | 11060 | 10604 | Terrestrial leaf fragments |
| 602-21-11 | Ua-75624 | 1.3 | 236.5 | -22.3 | 10261 ± 57 | 11757 | 12455 | 11985 | Terrestrial leaf fragments |
| 602-21-11 | Ua-75625 | 0.7 | 248.5 | N/A | 11377±283 | 12751 | 13792 | 13273 | Terrestrial leaf fragments |
| 602-21-4 | Ua-75615 | 1.3 | 7.5 | -25.7 | 1709 ± 31 | 1535 | 1633 | 1597 | Terrestrial leaf fragments |
| 602-21-4 | Ua-75616 | 1 | 56 | -26.6 | 8102 ± 34 | 8813 | 9254 | 9030 | Betula fragments |
| 602-21-4 | Ua-75618 | 1.2 | 187.5 | -28.7 | 10709 ± 285 | 11652 | 13224 | 12572 | Terrestrial leaf fragments |

**Supplementary Table 1. Radiocarbon sample overview.** The table shows all 14C samples extracted from the Berglivatnet and Lakssjøen records. The laboratory number of each sample indicates where the samples were analysed (Ua – Uppsala Tandem Laboratory, Poz – Poznan Laboratory). Where available, measured δ13C values are also displayed. Minimum and maximum calibrated ages represent the 95% confidence ranges of the respective age-depth models.

| **Unit** | **Unit 4** | **Unit 3** | **Subunit 3b** | **Subunit 3a** | **Unit 2** | **Unit 1** | **Subunit 1c** | **Subunit 1b** | **Subunit 1a** | **All units (1-4)** |
| --- | --- | --- | --- | --- | --- | --- | --- | --- | --- | --- |
| **Eigenvalue** | 1.860 | 4.812 | 5.029 | 4.999 | 3.176 | 3.298 | 4.371 | 3.843 | 2.407 | 4.906 |
| **Variance %** | 23.251 | 60.147 | 62.859 | 62.481 | 39.695 | 41.231 | 54.643 | 48.041 | 30.093 | 61.326 |
| **Cummulative %** | 23.251 | 60.147 | 62.859 | 62.481 | 39.695 | 41.231 | 54.643 | 48.041 | 30.093 | 61.326 |
|  |  |  |  |  |  |  |  |  |  |  |
| **Factor loadings** |  |  |  |  |  |  |  |  |  |  |
| **Ca** | 0.690 | 0.867 | 0.868 | 0.879 | 0.795 | 0.660 | 0.798 | 0.764 | 0.665 | 0.485 |
| **Ti** | 0.830 | 0.797 | 0.694 | 0.931 | 0.885 | 0.752 | 0.789 | 0.859 | 0.807 | 0.729 |
| **Mn** | -0.612 | 0.651 | 0.849 | 0.834 | 0.476 | 0.575 | 0.765 | 0.796 | -0.154 | 0.528 |
| **Fe** | -0.258 | 0.863 | 0.939 | 0.547 | 0.855 | 0.802 | -0.956 | 0.822 | 0.759 | 0.919 |
| **Ni** | -0.062 | -0.411 | -0.475 | -0.307 | -0.314 | -0.375 | 0.608 | -0.324 | -0.074 | -0.721 |
| **Cu** | -0.456 | -0.859 | -0.890 | -0.813 | -0.127 | -0.356 | 0.679 | -0.229 | -0.195 | -0.882 |
| **Inc/Coh** | -0.086 | -0.962 | -0.968 | -0.934 | -0.821 | -0.843 | 0.849 | -0.868 | -0.779 | -0.967 |
| **CTGrayscale** | 0.184 | 0.652 | 0.485 | 0.860 | 0.124 | 0.587 | -0.248 | 0.549 | 0.252 | 0.886 |

**Supplementary Table 2. PCA output of Berglivatnet scanning data.** Eigenvalues and factor loadings are shown for the most significant (61.3%) principal component (PC1)and split into (sub)units.
