# Supplementary material for: Hydroclimate intensification aided Early Holocene Arctic glacier survival
Source: Research Square preprint supplement (doi:10.21203/rs.3.rs-3970184/v1), 2024-03-04
Supplement: Supplementary file 2 [file e721dd0dceb127469712ffee.xlsx]

## Sheet: Fig.3 - Berglivatnet MS
602-21-10		602-21-11
Depth(cm)	MS	Depth(cm)	MS
0	41	0	52
0.2	46	0.2	51
0.4	45	0.4	54
0.6	44	0.6	57
0.8	43	0.8	57
1	40	1	54
1.2	38	1.2	48
1.4	39	1.4	46
1.6	42	1.6	47
1.8	44	1.8	49
2	45	2	51
2.2	45	2.2	51
2.4	43	2.4	46
2.6	41	2.6	42
2.8	42	2.8	46
3	47	3	47
3.2	52	3.2	51
3.4	47	3.4	49
3.6	41	3.6	48
3.8	39	3.8	48
4	43	4	48
4.2	40	4.2	48
4.4	38	4.4	45
4.6	39	4.6	42
4.8	42	4.8	39
5	42	5	40
5.2	41	5.2	41
5.4	41	5.4	41
5.6	39	5.6	43
5.8	34	5.8	48
6	30	6	53
6.2	36	6.2	55
6.4	38	6.4	53
6.6	36	6.6	48
6.8	37	6.8	45
7	38	7	45
7.2	36	7.2	49
7.4	32	7.4	51
7.6	32	7.6	48
7.8	32	7.8	46
8	32	8	44
8.2	33	8.2	43
8.4	37	8.4	44
8.6	37	8.6	48
8.8	26	8.8	51
9	19	9	51
9.2	20	9.2	47
9.4	22	9.4	43
9.6	25	9.6	38
9.8	27	9.8	36
10	30	10	32
10.2	34	10.2	34
10.4	37	10.4	39
10.6	40	10.6	44
10.8	46	10.8	44
11	52	11	37
11.2	47	11.2	31
11.4	39	11.4	31
11.6	34	11.6	38
11.8	31	11.8	42
12	34	12	46
12.2	45	12.2	45
12.4	60	12.4	44
12.6	64	12.6	39
12.8	49	12.8	35
13	38	13	35
13.2	36	13.2	37
13.4	38	13.4	40
13.6	42	13.6	40
13.8	46	13.8	41
14	47	14	42
14.2	47	14.2	41
14.4	42	14.4	38
14.8	42	14.6	40
15	47	14.8	41
15.2	47	15	38
15.4	43	15.2	37
15.6	36	15.4	38
15.8	31	15.6	38
16	30	15.8	38
16.2	30	16	42
16.4	25	16.2	43
16.6	21	16.4	42
16.8	23	16.6	39
17	24	16.8	42
17.2	23	17	42
17.4	21	17.2	42
17.6	22	17.4	42
17.8	23	17.6	44
18	23	17.8	44
18.2	23	18	41
18.4	23	18.2	40
18.6	23	18.4	38
18.8	22	18.6	36
19	26	18.8	34
19.2	27	19	32
19.4	22	19.2	30
19.6	19	19.4	27
19.8	22	19.6	26
20	32	19.8	25
20.2	37	20	23
20.4	34	20.2	25
20.6	27	20.4	27
20.8	21	20.6	27
21	21	20.8	27
21.2	20	21	26
21.4	19	21.2	26
21.6	22	21.4	27
21.8	22	21.6	28
22	19	21.8	27
22.2	22	22	29
22.4	25	22.2	38
22.6	23	22.4	41
22.8	21	22.6	36
23	18	22.8	34
23.2	19	23	37
23.4	21	23.2	40
23.6	22	23.4	47
23.8	23	23.6	50
24	20	23.8	42
24.2	19	24	38
24.4	21	24.2	36
24.6	21	24.4	39
24.8	23	24.6	40
25	25	24.8	40
25.2	28	25	38
25.4	28	25.2	34
25.6	25	25.4	34
25.8	24	25.6	34
26	29	25.8	35
26.2	36	26	39
26.4	42	26.2	36
26.6	45	26.4	30
26.8	43	26.6	30
27	43	26.8	34
27.2	40	27	36
27.4	35	27.2	32
27.6	31	27.4	30
27.8	30	27.6	29
28	32	27.8	26
28.2	30	28	21
28.4	34	28.2	17
28.6	37	28.4	19
28.8	37	28.6	23
29	39	28.8	28
29.2	39	29	29
29.4	35	29.2	30
29.6	37	29.4	27
29.8	39	29.6	23
30	39	29.8	22
30.2	37	30	23
30.4	38	30.2	25
30.6	41	30.4	28
30.8	42	30.6	31
31	38	30.8	29
31.2	36	31	25
31.4	38	31.2	27
31.6	39	31.4	29
31.8	38	31.6	30
32	36	31.8	28
32.2	33	32	26
32.4	32	32.2	25
32.6	32	32.4	25
32.8	33	32.6	27
33	33	32.8	30
33.2	34	33	30
33.4	33	33.2	27
33.6	35	33.4	26
33.8	37	33.6	26
34	38	33.8	27
34.2	39	34	27
34.4	42	34.2	27
34.6	44	34.4	30
34.8	46	34.6	29
35	51	34.8	29
35.2	51	35	29
35.4	49	35.2	25
35.6	44	35.4	28
35.8	41	35.6	34
36	39	35.8	36
36.2	37	36	32
36.4	36	36.2	29
36.6	38	36.4	24
36.8	38	36.6	26
37	38	36.8	30
37.2	38	37	32
37.4	35	37.2	29
37.6	35	37.4	29
37.8	38	37.6	33
38	40	37.8	41
38.2	37	38	37
38.4	36	38.2	28
38.6	34	38.4	25
39	32	38.6	30
39.2	32	38.8	39
39.4	34	39	36
39.6	32	39.2	31
39.8	25	39.4	28
40	25	39.6	29
40.2	29	39.8	35
40.4	30	40	42
40.6	29	40.2	38
40.8	32	40.4	29
41	35	40.6	20
41.2	36	40.8	16
41.4	38	41	17
41.6	40	41.2	17
41.8	40	41.4	20
42	39	41.6	22
42.2	41	41.8	20
42.4	46	42	17
42.6	42	42.2	15
42.8	35	42.4	13
43	29	42.6	11
43.2	30	42.8	8
43.4	36	43	7
43.6	35	43.2	7
43.8	35	43.4	5
44	43	43.6	5
44.2	47	43.8	4
44.4	40	44	4
44.6	45	44.2	3
44.8	59	44.4	3
45	59	44.6	2
45.2	48	44.8	2
45.4	41	45	3
45.6	38	45.2	2
45.8	32	45.4	2
46	30	45.6	3
46.2	29	45.8	2
46.4	32	46	2
46.6	35	46.2	2
46.8	35	46.4	1
47	32	46.6	0
47.2	26	46.8	1
47.4	23	47	1
47.6	22	47.2	1
47.8	29	47.4	3
48	33	47.6	3
48.2	38	47.8	2
48.4	40	48	2
48.6	42	48.2	2
48.8	43	48.4	1
49	50	48.6	2
49.2	49	48.8	4
49.4	51	49	2
49.6	51	49.2	1
49.8	49	49.4	2
50	44	49.6	0
50.2	43	49.8	1
50.4	43	50	1
50.6	42	50.2	0
50.8	39	50.4	1
51	36	50.6	3
51.2	38	50.8	2
51.4	37	51	1
51.6	38	51.2	2
51.8	41	51.4	2
52	40	51.6	3
52.2	41	51.8	3
52.4	40	52	3
52.6	40	52.2	2
52.8	41	52.4	2
53	43	52.6	3
53.2	44	52.8	2
53.4	45	53	2
53.6	46	53.2	2
53.8	48	53.4	3
54	54	53.6	2
54.2	57	53.8	2
54.4	55	54	2
54.6	49	54.2	2
54.8	44	54.4	2
55	42	54.6	2
55.2	41	54.8	4
55.4	34	55	2
55.6	34	55.2	2
55.8	38	55.4	1
56	39	55.6	2
56.2	38	55.8	1
56.4	40	56	3
56.6	42	56.2	2
56.8	42	56.4	2
57	43	56.6	3
57.2	47	56.8	3
57.4	49	57	2
57.6	47	57.2	2
57.8	49	57.4	3
58	60	57.6	4
58.2	64	57.8	2
58.4	57	58	3
58.6	46	58.2	2
58.8	36	58.4	3
59	34	58.6	2
59.2	35	58.8	1
59.4	41	59	1
59.6	45	59.2	2
59.8	41	59.4	2
60	42	59.6	2
60.2	49	59.8	3
60.4	50	60	2
60.6	45	60.2	2
60.8	42	60.4	2
61	44	60.6	2
61.2	45	60.8	2
61.4	41	61	3
61.6	38	61.2	2
61.8	35	61.4	3
62	32	61.6	2
62.2	35	61.8	2
62.4	39	62	2
62.6	39	62.2	2
62.8	40	62.4	2
63	41	62.6	2
63.2	41	62.8	3
63.4	47	63	2
63.6	56	63.2	2
63.8	65	63.4	3
64	66	63.6	3
64.2	60	63.8	2
64.4	58	64	2
64.6	56	64.2	2
64.8	50	64.4	3
65	44	64.6	5
65.2	40	64.8	4
65.4	41	65	3
65.6	52	65.2	3
65.8	63	65.4	2
66	62	65.6	1
66.2	51	65.8	1
66.4	45	66	2
66.6	45	66.2	2
66.8	47	66.4	2
67	44	66.6	2
67.2	42	66.8	2
67.4	40	67	2
67.6	37	67.2	2
67.8	39	67.4	2
68	46	67.6	2
68.2	57	67.8	3
68.4	64	68	3
68.6	65	68.2	2
68.8	58	68.4	3
69	53	68.6	3
69.2	50	68.8	2
69.4	47	69	2
69.6	42	69.2	2
69.8	38	69.4	2
70	38	69.6	2
70.2	37	69.8	2
70.4	30	70	3
70.6	29	70.2	2
70.8	30	70.4	1
71	41	70.6	2
71.2	47	70.8	2
71.4	43	71	1
71.6	51	71.2	2
71.8	53	71.4	3
72	34	71.6	2
72.2	26	71.8	1
72.4	29	72	3
72.6	32	72.2	3
72.8	35	72.4	3
73	41	72.6	2
73.2	48	72.8	3
73.4	51	73	3
73.6	52	73.2	2
73.8	56	73.4	2
74	53	73.6	2
74.2	48	73.8	3
74.4	47	74	2
74.6	46	74.2	2
74.8	40	74.4	2
75	35	74.6	1
75.2	35	74.8	3
75.4	37	75	3
75.6	36	75.2	3
75.8	33	75.4	2
76	40	75.6	3
76.2	49	75.8	2
76.4	55	76	2
77.6	50	76.2	2
77.8	39	76.4	2
78	44	76.6	2
78.2	47	76.8	1
78.4	42	77	2
78.6	40	77.2	2
78.8	34	77.4	0
79	31	77.6	0
79.2	31	77.8	2
79.4	34	78	1
79.6	31	78.2	1
79.8	27	78.4	2
80	36	78.6	1
80.2	38	78.8	2
80.4	37	79	1
80.6	36	79.2	1
80.8	39	79.4	1
81	46	79.6	2
81.2	43	79.8	3
81.4	38	80	2
81.6	36	80.2	2
81.8	37	80.4	3
82	36	80.6	2
82.2	32	80.8	2
82.4	32	81	2
82.6	33	81.2	1
82.8	35	81.4	2
83	34	81.6	3
83.2	28	81.8	2
83.4	28	82	2
83.6	27	82.2	2
83.8	22	82.4	2
84	19	82.6	2
84.2	25	82.8	1
84.4	23	83	0
84.6	25	83.2	1
84.8	33	83.4	3
85	31	83.6	2
85.2	31	83.8	3
85.4	28	84	3
85.6	26	84.2	1
85.8	24	84.4	3
86	24	84.6	2
86.2	29	84.8	2
86.4	35	85	2
86.6	37	85.2	2
86.8	39	85.4	3
87	39	85.6	3
87.2	33	85.8	3
87.4	35	86	3
87.6	42	86.2	3
87.8	44	86.4	3
88	48	86.6	3
88.2	58	86.8	4
88.4	55	87	2
88.6	57	87.2	4
88.8	54	87.4	3
89	44	87.6	4
89.2	50	87.8	5
89.4	57	88	4
89.6	40	88.2	4
89.8	35	88.4	3
90	34	88.6	4
90.2	35	88.8	5
90.4	40	89	5
90.6	43	89.2	3
90.8	37	89.4	2
91	37	89.6	2
91.2	40	89.8	2
91.4	35	90	4
91.6	36	90.2	4
91.8	37	90.4	2
92	35	90.6	2
92.2	30	90.8	3
92.4	34	91	3
92.6	39	91.2	4
92.8	45	91.4	3
93	38	91.6	5
93.2	30	91.8	4
93.4	28	92	5
93.6	30	92.2	5
93.8	35	92.4	5
94	40	92.6	5
94.2	41	92.8	5
94.4	32	93	4
94.6	41	93.2	5
94.8	78	93.4	5
95.4	54	93.6	5
95.6	26	93.8	5
95.8	25	94	7
96	29	94.2	5
96.2	27	94.4	7
96.4	32	94.6	7
96.6	36	94.8	6
96.8	35	95	5
97	26	95.2	3
97.2	23	95.4	4
97.4	20	95.6	4
97.6	21	95.8	5
97.8	22	96	5
98	20	96.2	5
98.2	21	96.4	7
98.4	25	96.6	6
98.6	27	96.8	7
98.8	28	97	8
99	37	97.2	7
99.2	38	97.4	9
99.4	31	97.6	9
99.6	27	97.8	6
99.8	26	98	5
100	30	98.2	5
100.2	27	98.4	5
100.4	24	98.6	6
100.6	20	98.8	5
100.8	21	99	4
101	27	99.2	5
101.2	32	99.4	3
101.4	32	99.6	4
101.6	26	99.8	3
101.8	24	100	4
102	30	100.2	5
102.2	31	100.4	4
102.4	36	100.6	4
102.6	51	100.8	4
102.8	43	101	4
103	32	101.2	4
103.2	31	101.4	5
103.4	27	101.6	4
103.6	24	101.8	4
103.8	30	102	6
104	33	102.2	6
104.2	31	102.4	6
104.4	26	102.6	4
104.6	27	102.8	2
104.8	28	103	4
105	26	103.2	4
105.2	28	103.4	4
105.4	39	103.6	4
105.6	40	103.8	4
105.8	28	104	4
106	24	104.2	3
106.2	25	104.4	4
106.4	29	104.6	4
106.6	34	104.8	4
106.8	29	105	3
107	28	105.2	5
107.2	30	105.4	5
107.4	30	105.6	5
107.6	31	105.8	3
107.8	32	106	4
108	31	106.2	4
108.2	29	106.4	4
108.4	25	106.6	4
108.6	23	106.8	5
108.8	19	107	3
109	21	107.2	6
109.2	20	107.4	6
109.4	19	107.6	6
109.6	16	107.8	6
109.8	12	108	5
110	8	108.2	6
110.2	8	108.4	5
110.4	7	108.6	4
110.6	8	108.8	4
110.8	8	109	4
111	12	109.2	3
111.2	12	109.4	3
111.4	4	109.6	3
111.6	4	109.8	4
111.8	2	110	3
112	2	110.2	4
112.2	2	110.4	3
112.4	1	110.6	4
112.6	1	110.8	4
112.8	2	111	5
113	1	111.2	5
113.2	1	111.4	4
113.4	1	111.6	5
113.6	2	111.8	5
113.8	2	112	5
114	2	112.2	5
114.2	2	112.4	5
114.4	2	112.6	7
114.6	1	112.8	7
114.8	1	113	7
115	0	113.2	7
115.2	1	113.4	7
115.4	1	113.6	6
115.6	1	113.8	7
115.8	0	114	6
116	1	114.2	7
116.2	2	114.4	5
116.4	1	114.6	6
116.6	1	114.8	6
116.8	1	115	5
117	2	115.2	5
117.2	1	115.4	5
117.4	2	115.6	4
117.6	3	115.8	4
117.8	7	116	4
118	14	116.2	4
118.2	7	116.4	3
118.4	3	116.6	3
118.6	1	116.8	2
118.8	2	117	3
119	1	117.2	3
119.2	3	117.4	3
119.4	1	117.6	3
119.6	1	117.8	4
119.8	3	118	3
120	3	118.2	4
120.2	1	118.4	4
120.4	-1	118.6	4
120.6	3	118.8	4
120.8	2	119	3
121	2	119.2	3
121.2	2	119.4	3
121.4	4	119.6	3
121.6	3	119.8	4
121.8	4	120	4
122	3	120.2	3
122.2	3	120.4	2
122.4	2	120.6	3
122.6	3	120.8	3
122.8	4	121	4
123	4	121.2	4
123.2	3	121.4	4
123.4	3	121.6	4
123.6	4	121.8	3
123.8	1	122	4
		122.2	4
		122.4	4
		122.6	3
		122.8	3
		123	3
		123.2	3
		123.4	3
		123.6	3
		123.8	4
		124	4
		124.2	3
		124.4	4
		124.6	4
		124.8	4
		125	3
		125.2	3
		125.4	4
		125.6	2
		125.8	4
		126	4
		126.2	3
		126.4	3
		126.6	3
		126.8	3
		127	2
		127.2	3
		127.4	3
		127.6	3
		127.8	2
		128	3
		128.2	3
		128.4	3
		128.6	3
		128.8	2
		129	3
		129.2	3
		129.4	3
		129.6	2
		129.8	3
		130	3
		130.2	2
		130.4	2
		130.6	2
		130.8	2
		131	3
		131.2	3
		131.4	3
		131.6	3
		131.8	3
		132	2
		132.2	2
		132.4	2
		132.6	2
		132.8	3
		133	1
		133.2	3
		133.4	3
		133.6	3
		133.8	3
		134	3
		134.2	4
		134.4	4
		134.6	2
		134.8	3
		135	3
		135.2	3
		135.4	4
		135.6	4
		135.8	6
		136	7
		136.2	7
		136.4	9
		136.6	11
		136.8	10
		137	8
		137.2	11
		137.4	13
		137.6	15
		137.8	17
		138	20
		138.2	23
		138.4	26
		138.6	25
		138.8	15
		139	7
		139.2	7
		139.4	6
		139.6	4
		139.8	5
		140	5
		140.2	7
		140.4	9
		140.6	13
		140.8	16
		141	17
		141.2	15
		141.4	13
		141.6	13
		141.8	13
		142	13
		142.2	12
		142.4	12
		142.6	13
		142.8	15
		143	15
		143.2	15
		143.4	14
		143.6	17
		143.8	16
		144	17
		144.2	19
		144.4	22
		144.6	25
		144.8	28
		145	37
		145.2	53
		145.4	83
		145.6	126
		145.8	155
		146	171
		146.2	192
		146.4	342
		146.6	490
		146.8	377
		147	226
		147.2	159
		147.4	146
		147.6	140
		147.8	152
		148	123
		148.2	101
		148.4	114
		148.6	111
		148.8	98
		149	91
		149.2	91
		149.4	104
		149.6	127
		149.8	124
		150	125
		150.2	134
		150.4	112
		150.6	113
		150.8	113
		151	118
		151.2	119
		151.4	107
		151.6	99
		151.8	90
		152	97
		152.2	105
		152.4	94
		152.6	85
		152.8	80
		153	77
		153.2	75
		153.4	80
		153.6	78
		153.8	79
		154	83
		154.2	93
		154.4	95
		154.6	95
		154.8	103
		155	103
		155.2	119
		155.4	154
		155.6	141
		155.8	130
		156	139
		156.2	124
		156.4	109
		156.6	105
		156.8	106
		157	112
		157.2	121
		157.4	138
		157.6	152
		157.8	149
		158	140
		158.2	150
		158.4	147
		158.6	165
		158.8	203
		159	248
		159.2	235
		159.4	161
		159.6	118
		159.8	106
		160	123
		160.2	170
		160.4	175
		160.6	116
		160.8	113
		161	191
		161.2	231
		161.4	183
		161.6	134
		161.8	114
		162	98
		162.2	101
		162.4	99
		162.6	99
		162.8	97
		163	94
		163.2	98
		163.4	116
		163.6	118
		163.8	99
		164	88
		164.2	85
		164.4	89
		164.6	88
		164.8	86
		165	91
		165.2	92
		165.4	90
		165.6	86
		165.8	83
		166	82
		166.2	80
		166.4	75
		166.6	71
		166.8	64
		167	53
		167.2	41
		167.4	40
		167.6	49
		167.8	60
		168	72
		168.2	94
		168.4	130
		168.6	160
		168.8	184
		169	187
		169.2	182
		169.4	170
		169.6	152
		169.8	140
		170	133
		170.2	126
		170.4	131
		170.6	137
		170.8	134
		171	124
		171.2	130
		171.4	132
		171.6	136
		171.8	133
		172	133
		172.2	141
		172.4	128
		172.6	118
		172.8	127
		173	134
		173.2	130
		173.4	129
		173.6	140
		173.8	151
		174	163
		174.2	173
		174.4	199
		174.6	230
		174.8	237
		175	212
		175.2	195

## Sheet: Fig.4 Age-depth_Berglivatnet
Depth (cm)	Age_min	Age_max	Age_median	Age_mean
0	-86	-58	-72	-72
0.5	-83	-51	-68	-68
1	-80	-42	-64	-63
1.5	-78	-31	-60	-59
2	-76	-19	-57	-54
2.5	-75	-7	-53	-50
3	-74	5	-49	-46
3.5	-73	17	-46	-41
4	-73	30	-42	-37
4.5	-72	43	-38	-32
5	-71	56	-34	-28
5.5	-67	58	-30	-24
6	-64	61	-26	-19
6.5	-61	63	-21	-15
7	-58	66	-16	-11
7.5	-55	72	-11	-6
8	-53	78	-7	-2
8.5	-52	85	-3	2
9	-50	96	1	6
9.5	-49	103	4	11
10	-47	111	8	15
10.5	-42	114	11	19
11	-39	117	15	23
11.5	-35	120	19	28
12	-32	125	23	32
12.5	-30	128	26	36
13	-28	132	30	40
13.5	-26	137	34	44
14	-24	144	38	49
14.5	-21	151	42	53
15	-19	158	47	57
15.5	-16	161	51	61
16	-11	164	55	65
16.5	-7	166	59	68
17	-4	170	64	72
17.5	-1	174	69	76
18	1	178	74	80
18.5	4	182	79	84
19	6	186	83	87
19.5	7	191	88	91
20	10	196	92	95
20.5	14	198	96	99
21	17	201	100	102
21.5	20	204	103	106
22	23	208	107	110
22.5	26	212	111	113
23	28	216	116	117
23.5	30	220	120	121
24	32	225	123	124
24.5	34	230	127	128
25	37	234	131	132
25.5	40	237	135	136
26	43	240	139	139
26.5	47	244	142	143
27	51	248	146	147
27.5	54	253	149	151
28	57	258	153	154
28.5	59	263	157	158
29	60	268	161	162
29.5	63	275	165	166
30	65	281	168	169
30.5	72	282	173	173
31	75	286	177	177
31.5	78	290	182	181
32	83	293	186	185
32.5	86	297	190	189
33	89	301	194	193
33.5	91	305	198	197
34	94	312	202	201
34.5	96	318	206	205
35	98	325	210	209
35.5	104	326	214	213
36	110	329	217	217
36.5	115	332	221	221
37	119	334	225	225
37.5	123	338	229	229
38	126	341	233	233
38.5	129	347	237	237
39	132	353	241	241
39.5	135	358	245	245
40	137	364	250	249
40.5	141	366	253	253
41	145	368	257	256
41.5	148	370	261	260
42	152	373	264	263
42.5	155	374	268	267
43	157	377	271	270
43.5	159	380	275	274
44	161	384	279	277
44.5	163	389	283	281
45	165	392	286	284
45.5	170	395	290	288
46	176	398	294	292
46.5	179	401	298	296
47	184	403	302	300
47.5	188	405	306	304
48	192	409	310	307
48.5	196	413	314	311
49	199	416	318	315
49.5	202	419	322	319
50	207	423	326	323
50.5	213	425	330	327
51	218	427	335	331
51.5	224	429	339	335
52	230	432	343	339
52.5	235	434	347	343
53	240	437	351	347
53.5	245	440	355	351
54	248	444	359	355
54.5	251	447	363	358
55	254	452	366	362
55.5	259	453	370	366
56	264	455	373	370
56.5	268	459	377	374
57	272	461	381	377
57.5	276	463	385	381
58	280	466	389	385
58.5	283	469	393	388
59	285	472	396	392
59.5	287	476	401	396
60	291	480	404	400
60.5	297	481	409	404
61	304	483	413	408
61.5	309	485	416	411
62	313	486	420	415
62.5	318	488	424	419
63	322	490	429	423
63.5	325	493	433	427
64	329	495	437	431
64.5	332	498	442	435
65	335	502	446	439
65.5	342	503	449	443
66	348	505	453	447
66.5	356	506	456	451
67	363	507	460	455
67.5	368	509	464	459
68	373	512	468	463
68.5	378	514	472	467
69	381	517	476	471
69.5	385	519	480	475
70	389	522	485	479
70.5	393	528	490	485
71	399	537	496	491
71.5	405	547	501	497
72	410	561	506	503
72.5	415	576	510	509
73	421	592	515	515
73.5	427	607	519	521
74	431	622	524	527
74.5	434	640	529	533
75	438	656	534	539
75.5	442	662	539	545
76	446	669	545	551
76.5	451	675	552	557
77	455	683	558	563
77.5	460	692	565	569
78	465	700	570	575
78.5	470	711	577	581
79	474	722	582	587
79.5	478	732	587	593
80	479	744	592	599
80.5	489	747	599	605
81	497	750	606	612
81.5	501	755	613	618
82	508	762	621	624
82.5	513	768	628	631
83	517	775	635	637
83.5	521	780	642	644
84	525	789	648	650
84.5	528	797	654	657
85	532	808	660	663
85.5	539	811	667	670
86	543	820	674	676
86.5	550	826	680	683
87	556	835	687	689
87.5	559	840	695	696
88	565	848	701	702
88.5	570	855	708	709
89	576	862	714	715
89.5	578	871	720	722
90	579	881	726	728
90.5	591	883	733	735
91	600	886	739	741
91.5	610	890	746	748
92	615	892	753	754
92.5	624	899	759	760
93	629	906	766	767
93.5	635	911	774	773
94	640	919	781	780
94.5	645	925	789	786
95	651	932	796	793
95.5	660	937	802	799
96	673	939	807	806
96.5	683	943	813	812
97	696	949	820	819
97.5	705	956	827	825
98	712	959	834	832
98.5	718	966	841	838
99	724	973	849	845
99.5	729	982	855	852
100	734	989	862	858
100.5	755	994	870	867
101	772	999	878	876
101.5	790	1003	886	885
102	806	1011	894	894
102.5	818	1019	903	903
103	830	1026	912	912
103.5	838	1032	921	921
104	844	1037	930	931
104.5	852	1045	938	940
105	857	1056	946	949
105.5	906	1087	990	991
106	954	1118	1034	1034
106.5	1000	1149	1078	1077
107	1045	1181	1123	1119
107.5	1086	1215	1166	1162
108	1125	1252	1210	1205
108.5	1161	1295	1253	1247
109	1199	1344	1296	1290
109.5	1239	1393	1338	1332
110	1277	1444	1380	1375
110.5	1332	1508	1423	1424
111	1372	1602	1464	1472
111.5	1387	1709	1510	1520
112	1397	1821	1558	1569
112.5	1403	1936	1604	1617
113	1412	2052	1648	1666
113.5	1419	2170	1693	1714
114	1425	2296	1739	1763
114.5	1430	2420	1783	1811
115	1438	2541	1829	1860
115.5	1468	2569	1878	1908
116	1496	2599	1934	1955
116.5	1516	2645	1988	2003
117	1536	2690	2049	2051
117.5	1555	2757	2106	2099
118	1571	2837	2157	2147
118.5	1587	2917	2207	2195
119	1602	3004	2253	2243
119.5	1617	3094	2303	2290
120	1628	3181	2344	2338
120.5	1694	3213	2402	2398
121	1755	3244	2459	2457
121.5	1805	3279	2514	2516
122	1847	3307	2572	2575
122.5	1891	3346	2629	2635
123	1927	3391	2691	2694
123.5	1972	3447	2751	2753
124	2017	3510	2807	2813
124.5	2056	3587	2864	2872
125	2081	3678	2924	2931
125.5	2197	3689	2992	2995
126	2308	3699	3059	3060
126.5	2420	3712	3127	3124
127	2504	3724	3198	3188
127.5	2602	3739	3269	3252
128	2671	3759	3342	3317
128.5	2736	3778	3415	3381
129	2817	3798	3485	3445
129.5	2900	3830	3558	3509
130	2966	3899	3623	3573
130.5	3109	3914	3661	3621
131	3248	3922	3698	3668
131.5	3386	3938	3738	3715
132	3515	3957	3777	3762
132.5	3618	3990	3818	3809
133	3696	4042	3859	3856
133.5	3733	4090	3903	3903
134	3755	4182	3942	3950
134.5	3774	4306	3981	3997
135	3789	4433	4018	4044
135.5	3821	4487	4051	4078
136	3842	4545	4081	4113
136.5	3860	4609	4111	4147
137	3877	4672	4141	4181
137.5	3892	4746	4171	4216
138	3904	4823	4201	4250
138.5	3913	4905	4229	4284
139	3921	4989	4259	4318
139.5	3930	5072	4286	4353
140	3936	5168	4315	4387
140.5	3973	5193	4352	4424
141	4001	5226	4393	4461
141.5	4020	5255	4435	4499
142	4043	5294	4474	4536
142.5	4061	5337	4516	4573
143	4069	5370	4555	4610
143.5	4085	5418	4594	4648
144	4096	5467	4635	4685
144.5	4111	5526	4674	4722
145	4122	5591	4712	4759
145.5	4170	5617	4751	4800
146	4207	5644	4792	4841
146.5	4249	5670	4836	4881
147	4275	5717	4880	4922
147.5	4296	5757	4923	4963
148	4320	5796	4968	5003
148.5	4339	5843	5015	5044
149	4348	5900	5055	5084
149.5	4360	5974	5095	5125
150	4374	6061	5131	5166
150.5	4432	6078	5172	5206
151	4484	6110	5212	5246
151.5	4522	6142	5253	5286
152	4565	6183	5299	5326
152.5	4605	6221	5346	5366
153	4637	6260	5391	5406
153.5	4663	6317	5437	5446
154	4692	6373	5480	5486
154.5	4710	6424	5517	5526
155	4725	6480	5556	5567
155.5	4771	6498	5589	5601
156	4819	6515	5616	5635
156.5	4861	6535	5652	5670
157	4902	6557	5685	5704
157.5	4945	6585	5721	5738
158	4977	6608	5756	5773
158.5	5005	6644	5792	5807
159	5031	6677	5826	5841
159.5	5051	6714	5858	5876
160	5076	6743	5889	5910
160.5	5143	6765	5934	5956
161	5215	6780	5982	6001
161.5	5274	6800	6032	6047
162	5334	6818	6093	6092
162.5	5373	6847	6151	6138
163	5399	6877	6202	6183
163.5	5422	6918	6252	6229
164	5461	6965	6299	6274
164.5	5496	7027	6344	6320
165	5515	7101	6391	6365
165.5	5566	7112	6430	6405
166	5619	7122	6468	6445
166.5	5680	7136	6503	6485
167	5731	7152	6545	6525
167.5	5784	7166	6590	6565
168	5823	7181	6633	6605
168.5	5869	7197	6676	6645
169	5895	7219	6722	6685
169.5	5923	7253	6765	6725
170	5937	7301	6808	6765
170.5	6055	7308	6845	6810
171	6170	7317	6886	6855
171.5	6293	7325	6928	6900
172	6399	7335	6970	6946
172.5	6499	7349	7011	6991
173	6588	7361	7057	7036
173.5	6663	7375	7102	7081
174	6729	7395	7148	7127
174.5	6783	7419	7195	7172
175	6816	7458	7242	7217
175.5	6905	7466	7264	7246
176	6989	7475	7288	7276
176.5	7064	7490	7310	7305
177	7140	7505	7333	7334
177.5	7209	7525	7359	7363
178	7254	7549	7385	7393
178.5	7280	7579	7420	7422
179	7293	7631	7449	7451
179.5	7305	7709	7474	7481
180	7316	7782	7497	7510
180.5	7349	7812	7525	7539
181	7372	7841	7553	7568
181.5	7390	7881	7583	7597
182	7401	7942	7610	7626
182.5	7410	8009	7637	7655
183	7418	8081	7662	7683
183.5	7425	8165	7687	7712
184	7430	8257	7713	7741
184.5	7437	8338	7737	7770
185	7442	8415	7763	7799
185.5	7472	8428	7790	7826
186	7496	8442	7816	7853
186.5	7518	8462	7841	7879
187	7541	8471	7868	7906
187.5	7559	8486	7897	7933
188	7578	8514	7926	7959
188.5	7589	8557	7951	7986
189	7602	8589	7977	8013
189.5	7616	8636	8004	8040
190	7624	8691	8031	8066
190.5	7652	8713	8056	8089
191	7672	8731	8082	8112
191.5	7689	8751	8104	8136
192	7712	8770	8128	8159
192.5	7726	8793	8153	8182
193	7735	8818	8177	8205
193.5	7745	8839	8206	8228
194	7754	8869	8228	8251
194.5	7766	8900	8252	8274
195	7778	8927	8275	8297
195.5	7827	8941	8306	8328
196	7868	8953	8341	8359
196.5	7906	8962	8374	8390
197	7935	8985	8408	8421
197.5	7959	9000	8444	8452
198	7977	9025	8476	8483
198.5	7994	9049	8509	8513
199	8012	9076	8545	8544
199.5	8033	9109	8577	8575
200	8050	9148	8608	8606
200.5	8104	9163	8635	8635
201	8139	9176	8664	8664
201.5	8180	9191	8693	8693
202	8220	9203	8726	8723
202.5	8256	9218	8753	8752
203	8288	9235	8786	8781
203.5	8317	9252	8816	8810
204	8342	9277	8846	8839
204.5	8366	9304	8876	8868
205	8387	9335	8905	8897
205.5	8433	9341	8932	8924
206	8484	9347	8959	8950
206.5	8524	9355	8988	8976
207	8557	9362	9021	9002
207.5	8587	9371	9050	9028
208	8610	9383	9080	9054
208.5	8630	9395	9111	9080
209	8648	9411	9138	9107
209.5	8656	9429	9168	9133
210	8669	9453	9195	9159
210.5	8743	9459	9220	9188
211	8816	9464	9246	9218
211.5	8889	9469	9270	9247
212	8957	9474	9297	9277
212.5	9032	9481	9323	9306
213	9098	9487	9350	9336
213.5	9161	9493	9377	9365
214	9215	9502	9406	9395
214.5	9252	9512	9435	9424
215	9281	9530	9467	9454
215.5	9317	9539	9490	9479
216	9341	9584	9514	9505
216.5	9359	9653	9534	9531
217	9376	9724	9552	9557	Event layer
217	9376	9724	9552	9557	Event layer
217.5	9376	9724	9552	9557	Event layer
218	9376	9724	9552	9557	Event layer
218.5	9376	9724	9552	9557	Event layer
219	9376	9724	9552	9557	Event layer
219.5	9376	9724	9552	9557	Event layer
220	9376	9724	9552	9557	Event layer
220.5	9376	9724	9552	9557	Event layer
221	9376	9724	9552	9557	Event layer
221.5	9376	9724	9552	9557	Event layer
222	9376	9724	9552	9557	Event layer
222.5	9376	9724	9552	9557	Event layer
223	9376	9724	9552	9557	Event layer
223	9376	9724	9552	9557	Event layer
223.5	9333	11745	10811	10728
224	9418	11765	10853	10778
224.5	9555	11788	10897	10828
225	9611	11808	10946	10878
225.5	9700	11830	10992	10928
226	9763	11852	11042	10978
226.5	9818	11878	11094	11028
227	9867	11923	11146	11077
227.5	9899	11965	11199	11127
228	9938	12024	11248	11177
228.5	10071	12040	11291	11227
229	10191	12054	11334	11276
229.5	10290	12076	11377	11326
230	10382	12098	11420	11375
230.5	10471	12126	11464	11425
231	10557	12148	11515	11474
231.5	10631	12182	11562	11523
232	10711	12217	11611	11573
232.5	10770	12256	11660	11622
233	10825	12300	11710	11672
233.5	10982	12313	11750	11725
234	11130	12329	11788	11779
234.5	11282	12352	11827	11832
235	11418	12374	11867	11885
235.5	11559	12396	11911	11939
236	11667	12417	11955	11992
236.5	11759	12447	12001	12045
237	11808	12505	12060	12099
237.5	11837	12583	12116	12152
238	11863	12671	12168	12205
238.5	11921	12707	12217	12253
239	11964	12746	12269	12302
239.5	12003	12793	12323	12350
240	12030	12847	12376	12398
240.5	12050	12913	12429	12446
241	12066	12979	12482	12494
241.5	12090	13049	12531	12542
242	12107	13128	12580	12590
242.5	12122	13222	12630	12639
243	12131	13319	12675	12687
243.5	12224	13341	12719	12736
244	12303	13369	12766	12784
244.5	12377	13392	12812	12833
245	12430	13427	12864	12882
245.5	12489	13457	12917	12931
246	12538	13500	12968	12980
246.5	12589	13548	13020	13029
247	12633	13610	13073	13078
247.5	12668	13674	13126	13127
248	12694	13727	13178	13176
248.5	12764	13775	13225	13228
249	12808	13826	13276	13280
249.5	12844	13886	13325	13332
250	12870	13987	13371	13383
250.5	12890	14078	13420	13435
251	12906	14193	13468	13487
251.5	12929	14318	13509	13539
252	12947	14470	13552	13591
252.5	12962	14631	13596	13643
253	12978	14795	13634	13695
253.5	13028	14842	13688	13747
254	13068	14906	13743	13798
254.5	13092	14973	13794	13849
255	13113	15030	13846	13901
255.5	13129	15117	13897	13952
256	13148	15203	13948	14004
256.5	13161	15274	13994	14055
257	13178	15390	14043	14107
257.5	13201	15495	14090	14158
258	13214	15604	14131	14210
258.5	13272	15649	14187	14261
259	13305	15711	14244	14312
259.5	13339	15783	14297	14363
260	13362	15859	14350	14414
260.5	13394	15943	14397	14465
261	13419	16063	14445	14516
261.5	13447	16148	14490	14567

## Sheet: Fig.5 Stratigraphy
Depth(cm)	LOI	DBD	GS_MEAN		Depth(cm)	Inc/Coh	Ti_TSN	Ca_TSN	CTGrayscale	MS
1	3.55	0.82	8.06254		0	3.9544	1.92819	0.937213	4954.39	41
3	4.01	0.75	7.90387		0.02	3.70941	1.83979	0.882078	4762.56	41.5
5	3.99	0.77	7.99617		0.04	3.62262	1.85094	0.899325	4849.81	42
7	3.85	0.81	8.07588		0.06	3.59478	1.89247	0.962132	4930.46	42.5
8.5	4.14	0.73	9.55513		0.08	3.53931	2.04227	1.03086	4892.95	43
9	4.08	0.76	8.98482		0.1	3.49473	2.00194	0.988509	4800.75	43.5
9.5	4.01	0.76	10.1463		0.12	3.42857	2.09678	1.07258	4881.98	44
10.5	3.84	0.74	7.26946		0.14	3.30863	1.97439	1.03564	4894.55	44.5
11	4.29	0.69	8.57207		0.16	3.45125	2.0831	1.04294	4856.77	45
12	4.06	0.81	7.72857		0.18	3.32339	2.08087	1.06972	4831.65	45.5
12.5	4.26	0.73	8.41198		0.2	3.48791	2.09236	1.00594	4928.07	46
13	4.02	0.8	18.6639		0.22	3.32861	1.94696	1.02515	5058.32	45.9
13.5	3.52	0.73	7.68078		0.24	3.313	2.13749	1.07977	5003.64	45.8
14	3.81	0.74	10.5224		0.26	3.25553	2.16988	1.03375	4910.4	45.7
14.5	3.76	0.82	10.5359		0.28	3.33165	1.96055	1.12695	4842.65	45.6
15	3.45	0.82	7.98931		0.3	3.36325	1.93824	1.14073	4778.37	45.5
15.5	3.35	0.82	10.3343		0.32	3.30365	1.99764	1.06368	4900.53	45.4
16	3	0.82	9.97863		0.34	3.3282	2.04132	1.09794	4860.98	45.3
17	4.25	0.78	8.29944		0.36	3.25738	2.06658	1.1721	4882.06	45.2
18	4.3	0.65	8.33387		0.38	3.34101	2.11552	1.14625	4946.67	45.1
19	4.33	0.64	7.79362		0.4	3.23099	2.18333	1.179	4781.92	45
20	4.35	0.64	8.72776		0.42	3.28634	2.17907	1.06189	4839.18	44.9
21	4.43	0.66	8.72315		0.44	3.41125	2.20769	1.0135	4876.18	44.8
22	4.69	0.56	8.08175		0.46	3.29861	2.05698	1.07045	4864.85	44.7
23	4.28	0.67	7.0108		0.48	3.4472	2.0256	1.02723	4841.07	44.6
24	4.48	0.65	8.77737		0.5	3.35447	2.12626	0.978998	4908.61	44.5
25	4.2	0.61	7.99915		0.52	3.3111	2.24798	1.03545	4740.92	44.4
26	4.38	0.74	8.43313		0.54	3.19299	2.37476	1.09208	4751.05	44.3
27	4.33	0.68	8.58702		0.56	3.25955	2.2749	1.0544	4795.16	44.2
27.5	4.11	0.83	9.03462		0.58	3.36878	2.26052	1.06605	4829.44	44.1
28	4.25	0.81	8.9785		0.6	3.21297	2.32242	1.13238	4922.62	44
29	4.06	0.8	8.49771		0.62	3.23779	2.40104	1.12228	5142.52	43.9
30	4.16	0.83	8.73247		0.64	3.3096	2.33949	1.12969	5113.42	43.8
30.5	4.12	0.81	8.26012		0.66	3.21764	2.23195	1.15708	5054.15	43.7
31	4.14	0.82	7.93957		0.68	3.18871	2.18879	1.11254	4978.48	43.6
32	4.16	0.88	8.0939		0.7	3.25245	2.1642	1.13839	4667.12	43.5
33	3.37	0.8	7.90855		0.72	3.18851	2.22545	1.11953	4650.37	43.4
34	4.18	0.75	8.43896		0.74	3.22133	2.31471	1.11208	4806.35	43.3
34.5	3.87	0.75	7.58039		0.76	3.22109	2.31523	1.16747	4995.38	43.2
35	3.75	0.77	7.94292		0.78	3.21815	2.28788	1.13763	5138.75	43.1
35.5	3.79	0.81	7.93957		0.8	3.25063	2.29758	1.24008	5224.68	43
36	3.46	0.86	8.56223		0.82	3.04221	2.23278	1.1033	5337.15	42.7
37	4.05	0.81	7.70876		0.84	3.29678	2.23614	1.13075	5362.12	42.4
38	3.92	0.73	8.47931		0.86	3.27424	2.26227	1.21131	5379.31	42.1
39	3.82	0.81	8.48886		0.88	3.2621	2.21177	1.25092	5316.66	41.8
40	4.08	0.75	8.36922		0.9	3.14521	2.24068	1.22981	4922.69	41.5
41	4.05	0.77	9.53634		0.92	3.33505	2.33214	1.21031	4703.37	41.2
42	4.01	0.73	9.52561		0.94	3.28707	2.21877	1.14819	4825.04	40.9
43	3.86	0.81	8.38585		0.96	3.37383	2.26338	1.1981	4980.91	40.6
44	3.73	0.73	8.39269		0.98	3.2198	2.25281	1.14248	5007.85	40.3
45	3.67	0.76	7.63492		1	3.20988	2.14621	1.11553	4910.62	40
46.5	3.89	0.79	8.37336		1.02	3.3164	2.15838	1.07785	4649.89	39.8
47.5	3.8	0.77	8.02121		1.04	3.37921	2.23286	1.03607	4647.26	39.6
49	4.62	0.63	8.11987		1.06	3.39849	2.05751	1.05057	4769.67	39.4
50	4.29	0.69	8.34687		1.08	3.34339	2.10161	1.11656	4890.61	39.2
51	4.35	0.77	8.25826		1.1	3.27217	2.05117	0.992501	4897.12	39
52	4.32	0.78	7.67233		1.12	3.23619	2.03331	0.974533	4906.3	38.8
53	4.38	0.8	8.15577		1.14	3.19168	2.00998	0.979723	4999.69	38.6
54	4.04	0.78	8.01737		1.16	3.20496	2.06534	1.04241	5138.06	38.4
55	4.13	0.78	9.12302		1.18	3.19558	2.21057	0.980134	5210.12	38.2
56	4.07	0.85	9.18925		1.2	3.24248	2.10623	1.02498	5015.63	38
57	4.22	0.75	8.21347		1.22	3.26876	2.14728	0.988154	4740.42	38.1
58	4.36	0.76	8.83325		1.24	3.2783	2.23574	0.955499	4778.75	38.2
59	4.42	0.73	8.22212		1.26	3.123	2.15381	1.02111	4901.52	38.3
60	4.26	0.71	9.78819		1.28	3.2259	2.10375	0.986813	5027.09	38.4
61	4.36	0.77	11.4354		1.3	3.10838	2.12358	0.94575	5264.36	38.5
62	4.55	0.73	8.23446		1.32	3.21534	2.197	1.06542	5516.67	38.6
63	4.41	0.7	7.73488		1.34	3.16192	2.1134	1.02596	5580.79	38.7
64	4.32	0.69	7.84167		1.36	3.35357	2.13583	1.04212	5299.22	38.8
65	4.03	0.87	8.37341		1.38	3.29711	2.16392	1.02395	4795.74	38.9
66	4.01	0.66	8.79133		1.4	3.29487	2.0904	1.00128	4538.69	39
67	4.27	0.76	7.76026		1.42	3.06693	2.18565	0.991003	4787.29	39.3
68	4.2	0.71	10.0147		1.44	3.32476	2.15099	0.989665	5025.74	39.6
69	3.86	0.82	7.95759		1.46	3.39775	2.19035	1.02773	5229.94	39.9
70	4	0.66	8.17174		1.48	3.17485	2.26578	1.02468	5409.67	40.2
71	4.48	0.48	9.66568		1.5	3.18702	2.19989	1.04495	5605.23	40.5
72	3.85	0.67	12.1121		1.52	3.26618	2.20061	1.01361	5213.11	40.8
73.27	4.21	0.64	11.4874		1.54	3.27365	2.09285	1.05875	4889.44	41.1
73.7	4.01	0.68	8.57553		1.56	3.34168	2.14272	0.973401	4781.6	41.4
74.13	3.99	0.68	8.71471		1.58	3.30265	2.17568	1.08959	4901.25	41.7
74.56	3.9	0.62	9.37999		1.6	3.13504	2.25004	1.03828	5108.01	42
74.99	3.96	0.6	8.71416		1.62	3.26051	2.17243	1.00179	5243.14	42.2
75.42	4.15	0.63	7.80027		1.64	3.16061	2.22138	0.957207	5349.45	42.4
75.86	4.47	0.57	8.43799		1.66	3.1659	2.07962	0.955079	5442.84	42.6
76.29	4.42	0.62	7.7691		1.68	3.2326	2.14931	0.936274	5557.21	42.8
76.72	4.22	0.66	8.54781		1.7	3.32442	2.11814	0.904129	5752.73	43
77.15	4.1	0.62	7.92671		1.72	3.26938	2.26741	0.963957	5591.69	43.2
77.58	4.04	0.65	8.95914		1.74	3.24664	2.08526	0.984462	5279.31	43.4
78.02	3.85	0.64	8.83094		1.76	3.17064	2.23421	0.983612	4969.12	43.6
78.45	4.07	0.65	8.21163		1.78	3.13815	2.20077	1.0356	4779.58	43.8
78.88	4.55	0.53	8.15042		1.8	3.22888	2.0632	1.02357	4792.65	44
79.74	5.08	0.5	9.23512		1.82	3.18182	2.16906	1.05075	4985.3	44.1
80.17	4.88	0.5	9.27447		1.84	3.39131	2.33701	1.03165	5216	44.2
80.61	4.41	0.61	9.05477		1.86	3.26796	2.39521	1.03972	5396.71	44.3
81.04	4.13	0.68	8.85161		1.88	3.35497	2.16287	1.06628	5412.12	44.4
81.47	4.21	0.65	9.54134		1.9	3.2989	2.23641	1.03274	5097.24	44.5
81.9	4.53	0.6	9.13454		1.92	3.28014	2.05227	1.10425	4923.65	44.6
82.33	4.68	0.57	9.99199		1.94	3.62755	1.95264	1.11389	4841.75	44.7
82.77	4.91	0.49	9.68175		1.96	3.43093	2.08781	1.00004	4698.67	44.8
83.2	5.05	0.49	9.34162		1.98	3.62266	1.95437	1.08496	4498.71	44.9
83.63	5	0.54	9.21566		2	3.63225	2.2139	1.02898	4462.79	45
84.06	5.04	0.45	8.96207		2.02	3.2546	2.07731	1.10017	4521.29	45
84.49	5.29	0.43	9.94913		2.04	3.54468	2.13988	1.16768	4545.6	45
84.92	5.31	0.48	9.42764		2.06	3.40925	2.2155	1.10341	4630.64	45
85.36	5.07	0.52	9.92734		2.08	3.38568	2.28376	1.14015	4752.29	45
85.79	5.34	0.48	9.14464		2.1	3.47143	2.29169	1.15445	4713.29	45
86.22	5.23	0.54	8.12994		2.12	3.47219	2.31413	1.16317	4793.32	45
86.65	4.78	0.65	8.15751		2.14	3.339	2.13641	1.21357	4910.96	45
87.08	4.88	0.65	9.30246		2.16	3.43962	2.11106	1.18692	4862.31	45
87.52	4.87	0.66	8.85763		2.18	3.46527	2.12313	1.12624	4677.95	45
87.95	4.7	0.74	8.29885		2.2	3.43395	2.23501	1.19002	4719.54	45
88.38	4.75	0.69	8.65497		2.22	3.5181	2.07347	1.12302	4676.46	44.8
88.81	4.65	0.7	8.78772		2.24	3.32702	2.14966	1.12944	4625.1	44.6
89.24	4.9	0.65	8.49821		2.26	3.21711	2.27861	1.17304	4618.19	44.4
89.67	5.09	0.58	9.03518		2.28	3.5722	2.34503	1.25691	4712.1	44.2
90.11	4.71	0.63	8.81818		2.3	3.35192	2.25745	1.25637	4976.84	44
90.54	4.63	0.65	9.25899		2.32	3.28035	2.19932	1.26027	5194.96	43.8
90.97	4.93	0.58	9.81852		2.34	3.28062	2.14549	1.23782	5163.74	43.6
91.4	4.96	0.57	9.09445		2.36	3.29948	2.05971	1.17404	4990.83	43.4
91.83	5	0.6	9.90459		2.38	3.40417	2.17505	1.15564	4777.08	43.2
92.27	4.96	0.65	9.67674		2.4	3.52569	2.12629	1.18544	4600.47	43
92.7	5.19	0.6	10.0627		2.42	3.25307	2.39198	1.17185	4723.83	42.8
93.13	5.24	0.52	8.50717		2.44	3.40645	2.25327	1.22914	4827.15	42.6
93.56	4.04	0.57	8.56398		2.46	3.29249	2.16171	1.16587	4984.51	42.4
93.99	4.25	0.54	9.41064		2.48	3.57395	2.25179	1.18331	5140.78	42.2
94.42	4.41	0.5	9.42581		2.5	3.30466	2.17946	1.17121	5027.72	42
94.86	5.17	0.43	9.24636		2.52	3.41128	2.06561	1.11995	4700.35	41.8
95.29	4.86	0.42	9.21039		2.54	3.48912	2.18412	1.13095	4525.47	41.6
95.72	4.4	0.46	9.80004		2.56	3.48892	2.25969	1.15662	4602.82	41.4
96.15	4.46	0.52	11.15		2.58	3.55988	2.17979	1.13995	4829.47	41.2
96.58	4.66	0.51	8.34003		2.6	3.44995	2.08991	1.18555	4816.29	41
97.02	5.14	0.43	9.53317		2.62	3.48135	2.01825	1.13948	4738.63	41.1
97.45	5.06	0.44	10.3568		2.64	3.4974	2.04357	1.11675	4690.84	41.2
97.88	4.98	0.47	12.4268		2.66	3.57183	2.02798	1.12462	4616.83	41.3
98.31	4.59	0.54	12.1629		2.68	3.64302	1.90992	1.05597	4544.88	41.4
98.74	4.45	0.54	10.0671		2.7	3.55024	1.98449	1.01289	4641.88	41.5
99.17	4.39	0.52	11.021		2.72	3.69037	1.96196	1.08736	4753.66	41.6
99.61	4.27	0.52	10.1486		2.74	3.4479	1.91425	1.03818	4787.35	41.7
100.04	4.7	0.48	11.0471		2.76	3.55668	1.89775	0.936151	4723.35	41.8
100.47	4.62	0.51	9.57262		2.78	3.39229	1.90122	0.982693	4646.59	41.9
100.9	4.78	0.49	9.70207		2.8	3.40687	2.00774	1.03295	4802.34	42
101.33	4.46	0.53	9.9345		2.82	3.41018	2.03238	1.02308	4951.73	42.5
101.77	4.24	0.58	10.7222		2.84	3.33479	2.09199	1.08893	5152.9	43
102.2	4.25	0.56	10.8187		2.86	3.31538	2.15004	1.0627	5273.5	43.5
102.63	4.31	0.51	13.1398		2.88	3.25285	2.10856	1.07533	5273.28	44
103.06	4.37	0.55	10.2512		2.9	3.18335	2.0618	1.0924	5259.46	44.5
103.49	4.49	0.52	11.5149		2.92	3.39614	2.0285	1.14754	5412.67	45
103.93	4.51	0.48	12.2618		2.94	3.21111	2.03668	1.09144	5481.44	45.5
104.36	5.8	0.52	12.9289		2.96	3.38264	2.21333	1.15506	5299.43	46
104.79	4.8	0.57	20.2646		2.98	3.40587	2.12805	1.18904	4926.33	46.5
105.22	5.43	0.56	17.4192		3	3.1611	2.19976	1.10938	4768.35	47
105.65	5.87	0.54	16.959		3.02	3.2394	2.29043	1.16549	4893.25	47.5
106.08	5.42	0.61	12.0703		3.04	3.17673	2.25377	1.18776	4853.94	48
106.52	8.2	0.6	17.4714		3.06	3.27328	2.29679	1.111	4855.28	48.5
106.95	4.88	0.63	15.7918		3.08	3.40613	2.25444	1.22059	4952.49	49
107.38	4.32	0.58	13.5215		3.1	3.53409	2.24475	1.16186	4920.52	49.5
107.81	9.25	0.5	23.8651		3.12	3.35039	2.1449	1.0963	5007.28	50
109.34	7.15	0.51	12.7682		3.14	3.46057	2.17177	1.17796	5082.07	50.5
111.04	9.95	0.41	9.39148		3.16	3.50585	2.12904	1.13226	5108.14	51
111.62	11.84	0.37	11.9954		3.18	3.26462	2.17973	1.0622	5052.47	51.5
112.76	12.41	0.34	12.217		3.2	3.34711	2.07572	1.0745	4873.78	52
113.9	13.76	0.32	13.5276		3.22	3.27369	2.19503	1.02545	4863.73	51.5
115.04	13.82	0.32	11.5857		3.24	3.36431	2.24515	1.10332	4828.51	51
116.18	13.47	0.32	11.0466		3.26	3.37398	2.2123	1.1892	4831.11	50.5
117.32	15	0.3	12.8908		3.28	3.31255	2.27293	1.14787	4872.19	50
118.47	14.5	0.31	10.5474		3.3	3.34943	2.29762	1.16726	4830.3	49.5
119.61	13.8	0.3	12.7434		3.32	3.40388	2.28924	1.16615	4769.34	49
120.75	12	0.36	12.1239		3.34	3.4015	2.22615	1.12458	4879.8	48.5
121.89	13.27	0.32	16.0385		3.36	3.13465	2.20785	1.23372	5075.84	48
123.03	13	0.33	16.4249		3.38	3.21708	2.21939	1.2523	5340.23	47.5
124.17	12.24	0.34	12.2888		3.4	3.20022	2.27324	1.25168	5801.24	47
125.32	13.91	0.32	11.813		3.42	3.23597	2.21729	1.24533	5529.1	46.4
126.46	11.69	0.36	20.6424		3.44	3.09901	2.29149	1.36631	5460.56	45.8
127.6	11.81	0.37	16.0089		3.46	3.14624	2.23471	1.28805	5491.62	45.2
128.74	13.55	0.34	16.9488		3.48	3.064	2.36073	1.25222	5491.91	44.6
129.88	11.78	0.38	16.7554		3.5	3.16115	2.32556	1.16186	5367.42	44
132.17	12.53	0.36	19.4247		3.52	3.24551	2.2351	1.05582	5023	43.4
133.31	12.15	0.34	32.8379		3.54	3.16856	2.19873	1.07429	4993.58	42.8
134.45	13.03	0.37	17.6813		3.56	3.26135	2.17683	1.08887	5101.64	42.2
136.16	11.64	0.38	17.8509		3.58	3.305	2.22362	1.15524	5233.63	41.6
137.87	13.16	0.33	18.9968		3.6	3.25271	2.11841	1.03335	5450.77	41
139.02	12.81	0.38	18.931		3.62	3.27393	2.17699	1.07103	5597.52	40.8
141.3	12.41	0.36	26.1538		3.64	3.25979	2.13468	1.14866	5227.61	40.6
143.58	12.24	0.34	19.3092		3.66	3.48976	2.212	1.20937	4799.58	40.4
145.87	12.49	0.36	18.9704		3.68	3.41985	2.03732	1.10847	4633.99	40.2
148.15	12.36	0.35	16.3884		3.7	3.39775	1.97047	1.00242	4751.68	40
150.43	13.97	0.31	19.9621		3.72	3.30514	2.09361	1.0261	4967.13	39.8
152.72	12.69	0.34	17.2276		3.74	3.46403	1.96637	0.972514	4948.46	39.6
155	13	0.37	17.4484		3.76	3.3917	2.03937	1.02668	4787.13	39.4
158.42	11.09	0.35	19.3792		3.78	3.4126	2.02746	1.01327	4641.7	39.2
160.71	10.24	0.37	14.8823		3.8	3.30013	1.88655	1.05444	4757.22	39
162.42	8.56	0.44	21.2691		3.82	3.5314	2.00995	1.02199	4900.06	39.4
163.56	9.92	0.42	15.9349		3.84	3.36252	2.02043	1.01862	5256.42	39.8
166.41	9.57	0.36	15.1331		3.86	3.31635	2.03138	1.003	5529.05	40.2
168.7	9.07	0.36	14.4372		3.88	3.15805	2.21865	1.06701	5519.44	40.6
170.98	8.97	0.37	14.0145		3.9	3.30244	2.20922	1.13852	5229.76	41
172.69	9.93	0.35	16.1823		3.92	3.34807	2.09746	0.965467	4973.92	41.4
173.84	9.59	0.34	18.4448		3.94	3.37464	2.04766	0.931429	4767.5	41.8
175.55	9.18	0.38	16.5613		3.96	3.29974	1.82806	0.909807	4711.08	42.2
177.26	8.29	0.42	20.8769		3.98	3.60943	1.83042	0.919507	4822.8	42.6
179.54	8.89	0.36	29.8479		4	3.41907	2.11253	0.920672	4973.79	43
181.26	7.67	0.39	18.2252		4.02	3.21439	2.22854	0.997852	5038.66	42.7
183.54	7.5	0.39	17.8935		4.04	3.29716	2.20379	1.02411	5207.5	42.4
185.25	7.8	0.41	30.1		4.06	3.25661	2.32274	1.00914	5362.89	42.1
186.96	7.88	0.43	23.2949		4.08	3.11526	2.42031	1.03606	5397.48	41.8
189.25	8.05	0.45	26.6808		4.1	3.1345	2.48731	1.04303	5242.7	41.5
189.82	8.07	0.44	44.4821		4.12	3.11704	2.35623	1.10903	5271.08	41.2
190.39	8.18	0.42	45.3686		4.14	3.1309	2.32724	1.12519	5314.28	40.9
191.3	7.88	0.47	66.6387		4.16	3.15722	2.2973	1.0689	5413.2	40.6
196.1	7.07	0.43	29.4892		4.18	3.26304	2.35436	1.0652	5531.3	40.3
198.38	7.46	0.43	18.4621		4.2	3.11411	2.23187	1.11452	5457.72	40
200.66	7.12	0.43	19.16		4.22	3.3916	2.15433	1.05169	5337.86	39.8
202.95	6.88	0.41	13.4155		4.24	3.19655	2.2143	1.07379	5028.25	39.6
206.37	6.92	0.42	15.0375		4.26	3.24033	2.03396	1.06935	4771.84	39.4
208.08	7.47	0.42	14.0006		4.28	3.20041	2.07098	1.10687	4750.02	39.2
209.8	7.56	0.42	14.0959		4.3	3.27006	2.08995	1.02698	5004.71	39
211.05	7.03	0.4	18.1454		4.32	3.47263	2.16456	1.1214	5064.1	38.8
216.08	6.83	0.46	18.9663		4.34	3.50329	2.02651	1.03431	5138.88	38.6
216.65	6.6	0.59	20.3916		4.36	3.28943	2.05498	1.07197	5046.88	38.4
218.39	2.77	1	8.38445		4.38	3.36812	2.08162	1.10069	4758.86	38.2
218.93	3.62	0.6	17.1952		4.4	3.38484	2.01639	1.02103	4580.9	38
221.21	7.18	0.45	33.9214		4.42	3.34644	1.96822	1.08645	4774.28	38.1
222.93	6.24	0.56	21.1292		4.44	3.43481	1.96973	1.03151	4940.71	38.2
223.5	4.37	0.78	19.6937		4.46	3.37808	1.96702	0.990352	4990.04	38.3
224.07	3.24	1.05	19.8658		4.48	3.50691	1.86193	0.986211	4886.9	38.4
225.21	2.89	1.13	16.9316		4.5	3.31886	1.91894	1.01445	4647.25	38.5
226.35	2.94	1.2	19.3446		4.52	3.47856	1.94033	1.02026	4735.61	38.6
227.49	2.54	1.37	25.898		4.54	3.27802	1.87795	0.989593	4872.73	38.7
229.78	2.43	1.3	26.18		4.56	3.31769	2.08959	1.02373	4993.18	38.8
230.35	2.38	1.49	26.8097		4.58	3.37452	2.042	1.03734	5067.39	38.9
231.72	2.49	1.27	18.0639		4.6	3.16201	1.98387	1.05007	5103.77	39
233.54	2.35	1.32	18.8395		4.62	3.32871	2.1969	1.11307	5126.88	39.3
235.48	2.68	1.15	18.2812		4.64	3.15867	2.0653	1.08401	5130.49	39.6
237.77	3.01	1.26	16.7284		4.66	3.29332	2.21948	1.03947	5143.35	39.9
239.02	2.97	1.06	22.1672		4.68	3.33419	2.25515	1.12256	5167.67	40.2
240.39	2.46	1.38	19.2253		4.7	3.21252	2.25459	1.13895	5145.92	40.5
242.33	2.77	1.38	19.5545		4.72	3.37762	2.21995	1.09651	5140.07	40.8
243.48	2.7	1.34	17.7396		4.74	3.24559	2.17546	1.08284	5039.78	41.1
244.62	2.67	1.44	21.5665		4.76	3.40039	2.26427	1.08944	4913.85	41.4
245.19	2.49	1.22	17.2912		4.78	3.29917	2.32932	1.13299	4826.19	41.7
248.04	2.75	1.5	17.0101		4.8	3.41085	2.27908	1.12124	4808.16	42
249.76	2.56	1.69	19.4733		4.82	3.28311	2.26076	1.10413	4694.81	42
250.9	4.05	1.09	17.9076		4.84	3.34955	2.2311	1.135	4748.31	42
253.75	3.24	1.1	18.6454		4.86	3.19739	2.1607	1.2182	4838.98	42
256.61	3.17	1.51	20.1693		4.88	3.31535	2.24992	1.17049	4900.42	42
258.32	2.88	1.28	20.0669		4.9	3.29248	2.06624	1.05786	5063.06	42
260.72	2.03	1.51	29.5266		4.92	3.36343	2.11224	1.13579	5120.01	42
					4.94	3.24704	2.07397	1.14386	4918.93	42
					4.96	3.49165	2.11106	1.17076	4766.86	42
					4.98	3.47535	2.07923	1.08201	4810.83	42
					5	3.56735	2.21467	1.0903	4793.59	42
					5.02	3.34101	2.12554	1.16525	4767.59	41.9
					5.04	3.4174	2.14059	1.20952	4742.78	41.8
					5.06	3.34265	2.08972	1.13822	4709.36	41.7
					5.08	3.42903	2.13297	1.1008	4723.2	41.6
					5.1	3.36921	2.05779	1.10375	4998.02	41.5
					5.12	3.48352	2.13133	1.12737	5133.36	41.4
					5.14	3.29948	2.24549	1.18175	5095.21	41.3
					5.16	3.24094	2.13051	1.11648	4917.39	41.2
					5.18	3.49502	2.13533	1.15239	4728.54	41.1
					5.2	3.15116	2.18432	1.10829	4860.72	41
					5.22	3.33435	2.10828	1.08755	4815.83	41
					5.24	3.31528	2.24014	1.17902	4794.95	41
					5.26	3.11371	2.27189	1.20949	4894.61	41
					5.28	2.99481	2.23468	1.12122	5066.27	41
					5.3	3.18396	2.1629	1.16271	4954.72	41
					5.32	3.20535	2.13206	1.12601	4863.76	41
					5.34	3.26425	2.1914	1.09527	4983.11	41
					5.36	3.27002	2.08457	1.05709	5175.16	41
					5.38	3.2556	1.93746	1.06867	5257.58	41
					5.4	3.34258	2.05791	1.08513	4990.52	41
					5.42	3.33508	2.10049	1.04061	4943.12	40.8
					5.44	3.42791	2.03806	1.10057	4990.26	40.6
					5.46	3.26756	2.13397	1.11199	4975.86	40.4
					5.48	3.26762	2.19978	1.14639	4857.44	40.2
					5.5	3.18486	2.20586	1.17329	4855.75	40
					5.52	3.24569	2.25991	1.07729	4985.48	39.8
					5.54	3.03005	2.16078	1.1477	5123.51	39.6
					5.56	3.23451	2.27213	1.13257	5274.11	39.4
					5.58	3.19404	2.18222	1.09198	5404.93	39.2
					5.6	3.36773	2.16706	1.08178	5363.79	39
					5.62	3.32561	2.13288	1.12799	5176.3	38.5
					5.64	3.41112	2.09229	0.999275	5019.35	38
					5.66	3.28562	1.97468	1.02549	4948.91	37.5
					5.68	3.33779	2.17049	1.10999	4979.06	37
					5.7	3.29058	2.03615	0.98189	5061.87	36.5
					5.72	3.43144	1.97154	0.9488	5097.48	36
					5.74	3.26034	2.07328	1.01197	5058.68	35.5
					5.76	3.45985	2.06916	1.01191	5043.09	35
					5.78	3.38917	2.11487	0.965289	5074.48	34.5
					5.8	3.35966	2.1015	1.0017	4968.82	34
					5.82	3.50249	1.88061	1.02908	5070.53	33.6
					5.84	3.32231	1.98951	0.971665	5104.53	33.2
					5.86	3.34711	2.02207	1.04615	5090.41	32.8
					5.88	3.42152	1.90924	1.01734	5050.72	32.4
					5.9	3.57503	1.99882	0.99295	4940.38	32
					5.92	3.44252	1.98633	1.01741	4819.44	31.6
					5.94	3.42497	2.00089	0.917668	4778.82	31.2
					5.96	3.51741	1.91574	0.917044	4731.04	30.8
					5.98	3.38352	1.75374	0.928503	4682.37	30.4
					6	3.46155	1.87263	0.866089	4927.78	30
					6.02	3.5166	1.75822	0.876824	4809.19	30.6
					6.04	3.40901	1.84996	0.993818	4714.03	31.2
					6.06	3.54598	2.04571	0.913568	4714.78	31.8
					6.08	3.30053	2.15575	0.964486	4819.22	32.4
					6.1	3.37204	2.16115	1.11132	4962.77	33
					6.12	3.16976	2.31093	1.14705	5128.93	33.6
					6.14	3.09874	2.32366	1.07697	5111.32	34.2
					6.16	3.21617	2.29907	1.11959	4992.44	34.8
					6.18	3.24718	2.21424	1.05486	4873.41	35.4
					6.2	3.16299	2.17063	0.959879	4824.27	36
					6.22	3.09652	2.08483	0.984528	4886.6	36.2
					6.24	3.08207	2.11488	1.09092	4896.71	36.4
					6.26	3.0299	2.07678	1.0242	4919.14	36.6
					6.28	3.04571	2.00889	0.947317	5005.99	36.8
					6.3	3.1005	1.97666	0.971703	5120.84	37
					6.32	3.08603	1.96817	1.01068	5280.28	37.2
					6.34	3.23261	1.81216	0.878929	5333.55	37.4
					6.36	3.10247	1.8803	0.87078	5362.1	37.6
					6.38	3.27528	1.7684	0.866542	5425.43	37.8
					6.4	3.30861	1.64154	0.89647	5458.55	38
					6.42	3.40883	1.73054	0.92221	5445.5	37.8
					6.44	3.57551	1.71035	0.864166	5400.19	37.6
					6.46	3.60359	1.71398	0.848623	5287.16	37.4
					6.48	3.43416	1.7461	0.879532	5103.86	37.2
					6.5	3.50453	1.83718	0.909875	4943.25	37
					6.52	3.51861	1.93291	0.921344	4795.06	36.8
					6.54	3.43594	2.1645	0.93571	4668.64	36.6
					6.56	3.4628	2.13032	0.995567	4628.27	36.4
					6.58	3.34074	2.16666	1.03241	4711.57	36.2
					6.6	3.24894	2.13748	1.04462	4883.79	36
					6.62	3.18907	2.25135	1.05966	4819.04	36.1
					6.64	3.35308	2.14581	1.06769	4819.68	36.2
					6.66	3.26716	2.02115	1.09329	4869.77	36.3
					6.68	3.2323	2.10633	0.957581	4908.31	36.4
					6.7	3.25584	2.0691	1.05073	4847.22	36.5
					6.72	3.39393	2.01592	1.11434	4903.6	36.6
					6.74	3.359	2.06752	1.00895	4972	36.7
					6.76	3.32354	1.99853	0.882646	5074.49	36.8
					6.78	3.38684	1.97271	1.03012	5234.28	36.9
					6.8	3.34449	1.95822	0.993377	5444.64	37
					6.82	3.36303	1.99105	1.02506	5415.89	37.1
					6.84	3.47718	2.10102	1.0985	5416.92	37.2
					6.86	3.22475	2.1411	0.997517	5402.08	37.3
					6.88	3.34199	2.22639	1.09193	5343.04	37.4
					6.9	3.43755	2.30742	1.10459	5367.18	37.5
					6.92	3.18172	2.27351	1.15312	5200.81	37.6
					6.94	3.23534	2.18917	1.06789	4895.81	37.7
					6.96	3.33913	2.1478	1.15273	4717.81	37.8
					6.98	3.27589	2.19914	1.06768	4798.46	37.9
					7	3.26727	2.13981	1.05181	4822.84	38
					7.02	3.22007	2.19535	1.06975	4860.66	37.8
					7.04	3.37371	2.11939	1.12796	4916.12	37.6
					7.06	3.33326	2.11481	1.14552	4975.31	37.4
					7.08	3.20984	2.12571	1.05196	4986.48	37.2
					7.1	3.31732	2.11874	1.05154	4780.47	37
					7.12	3.3453	2.21721	1.0503	4671.21	36.8
					7.14	3.35085	2.12829	1.07599	4742.06	36.6
					7.16	3.22526	2.16467	1.11618	4895.2	36.4
					7.18	3.38088	2.02022	1.05223	5032.7	36.2
					7.2	3.46413	1.94793	0.973966	5131.43	36
					7.22	3.48091	2.06024	1.03982	5286.74	35.6
					7.24	3.45278	2.09879	1.10611	5362.89	35.2
					7.26	3.27907	2.32133	1.09075	5360.15	34.8
					7.28	3.38193	2.20956	1.11609	5312.22	34.4
					7.3	3.38722	2.09281	1.02741	5292.6	34
					7.32	3.39054	1.94742	1.01948	5016.32	33.6
					7.34	3.59799	2.13055	1.0373	4884.38	33.2
					7.36	3.4216	1.96838	1.06492	4853.69	32.8
					7.38	3.47108	2.17047	1.08218	4848.55	32.4
					7.4	3.32885	2.18926	1.07842	4884.8	32
					7.42	3.35638	2.14262	1.11329	5034.6	32
					7.44	3.53382	1.96684	0.940433	5149.54	32
					7.46	3.81877	1.87721	0.966617	5216.71	32
					7.48	3.63079	1.81955	0.970961	5267.15	32
					7.5	3.63141	1.79443	0.978375	5412.26	32
					7.52	3.70941	1.92636	0.964075	5316.49	32
					7.54	3.61789	1.7834	0.936331	5172.01	32
					7.56	3.65007	1.89111	1.03909	4965.27	32
					7.58	3.64519	1.9409	1.06508	4739.87	32
					7.6	3.59974	1.87246	1.04114	4816.52	32
					7.62	3.55894	2.00073	0.976481	4806.49	32
					7.64	3.5508	1.80559	0.978585	4847.1	32
					7.66	3.43301	1.88833	0.989709	4976.07	32
					7.68	3.50132	2.04922	0.998383	5151.44	32
					7.7	3.34065	2.05552	1.03478	5119.28	32
					7.72	3.12986	2.17253	1.05918	5030.81	32
					7.74	3.28485	2.14692	1.14158	4950.16	32
					7.76	3.38592	2.35025	1.08248	4845.84	32
					7.78	3.50589	2.253	1.05832	4717.19	32
					7.8	3.34909	2.24137	1.09635	4712.33	32
					7.82	3.39259	2.18176	1.1173	5022.61	32
					7.84	3.4403	2.20666	1.14295	5192.57	32
					7.86	3.45241	2.11959	1.0964	5267.55	32
					7.88	3.35693	1.99793	1.02085	5314.67	32
					7.9	3.49009	2.03222	1.03847	5212.36	32
					7.92	3.49951	1.95447	1.05931	4730.65	32
					7.94	3.53708	1.9433	1.0581	4587.83	32
					7.96	3.64054	1.95897	1.0506	4593.47	32
					7.98	3.5733	1.87996	0.918811	4539.32	32
					8	3.65538	1.91891	0.938176	4637.11	32
					8.02	3.70095	1.98705	1.04036	4690.9	32.1
					8.04	3.48397	1.77567	0.953634	4629.23	32.2
					8.06	3.70991	1.853	1.00401	4517.24	32.3
					8.08	3.6675	1.94909	0.993102	4470.65	32.4
					8.1	3.67228	1.82706	0.932579	4717.46	32.5
					8.12	3.56932	1.92719	0.934748	4748.89	32.6
					8.14	3.38021	1.834	0.851013	4718.97	32.7
					8.16	3.60911	1.8551	1.01517	4703.44	32.8
					8.18	3.66819	1.98266	0.938771	4721.79	32.9
					8.2	3.45737	2.07267	0.976477	4632.17	33
					8.22	3.48752	1.95623	1.00649	4634.98	33.4
					8.24	3.51488	1.8852	1.02196	4675.39	33.8
					8.26	3.54745	2.01737	0.960147	4794.12	34.2
					8.28	3.54859	1.93856	1.0717	4975.58	34.6
					8.3	3.60718	2.05424	1.04665	4952.8	35
					8.32	3.47722	2.09129	0.981243	4996.52	35.4
					8.34	3.47141	2.03166	1.01938	4950.29	35.8
					8.36	3.37562	1.87529	1.0082	4875.57	36.2
					8.38	3.58696	2.02497	0.995292	4844.01	36.6
					8.4	3.66623	1.94701	1.09717	4835.42	37
					8.42	3.44468	2.01397	1.10306	5004.57	37
					8.44	3.33256	1.95695	1.03237	5125.71	37
					8.46	3.25148	2.0876	1.07395	5232.64	37
					8.48	3.18711	2.10177	1.07369	5301.42	37
					8.5	3.33319	2.12355	1.1336	4915.36	37
					8.52	3.1907	2.17281	1.06014	4664.99	37
					8.54	3.23209	2.32193	1.09833	4701.35	37
					8.56	3.02001	2.21913	1.08678	4823.79	37
					8.58	3.0862	2.26387	0.952118	4841.69	37
					8.6	3.1136	2.28541	1.14443	4838.1	37
					8.62	3.12033	2.12573	1.06546	4846.73	35.9
					8.64	3.15824	2.13479	1.0661	4937.15	34.8
					8.66	3.1297	2.13022	1.00235	4937.25	33.7
					8.68	3.05598	2.08143	0.999294	4740	32.6
					8.7	3.02016	2.11289	1.09024	4631.39	31.5
					8.72	3.21198	2.16903	1.06316	4753.41	30.4
					8.74	3.06934	2.15373	1.08346	4757.74	29.3
					8.76	3.38736	2.1634	0.964037	4720.72	28.2
					8.78	3.26687	2.07897	1.09738	4739.05	27.1
					8.8	3.21681	2.16341	1.05618	4698.18	26
					8.82	3.477	2.1167	1.00649	4853.61	25.3
					8.84	3.50973	2.10173	1.01469	4858.2	24.6
					8.86	3.56661	1.92698	1.05912	4751.2	23.9
					8.88	3.31068	2.01553	1.07537	4684.93	23.2
					8.9	3.40996	2.16732	1.03834	4994.18	22.5
					8.92	3.45637	2.00824	0.998757	5028.46	21.8
					8.94	3.45688	1.96553	0.981857	4907.77	21.1
					8.96	3.33279	1.97672	1.02021	4854.1	20.4
					8.98	3.50084	1.84034	1.02302	4988.2	19.7
					9	3.62505	1.88978	0.988316	4948.6	19
					9.02	3.56278	1.80478	0.91292	4955.02	19.1
					9.04	3.54151	1.7513	0.889548	4996.04	19.2
					9.06	3.42042	1.75745	0.928923	4939.42	19.3
					9.08	3.47042	1.74571	0.908929	4754.28	19.4
					9.1	3.34781	1.73714	0.910998	4914.86	19.5
					9.12	3.36836	1.71003	0.899371	4859.97	19.6
					9.14	3.473	1.75233	0.857923	4808.77	19.7
					9.16	3.64263	1.62988	0.893284	4849.18	19.8
					9.18	3.48327	1.59147	0.83431	4989.48	19.9
					9.2	3.49658	1.7378	0.914137	5015.54	20
					9.22	3.44934	1.80989	0.878038	4930.55	20.2
					9.24	3.4659	1.75534	0.894052	4853.13	20.4
					9.26	3.54237	1.86102	0.973103	4795.69	20.6
					9.28	3.5745	1.71063	0.858548	4789.7	20.8
					9.3	3.41192	1.81951	0.928434	5046.97	21
					9.32	3.5672	1.84093	0.899102	5255.95	21.2
					9.34	3.53093	1.75232	0.886455	5512.14	21.4
					9.36	3.44053	1.87583	0.921148	5722.85	21.6
					9.38	3.42618	1.82491	0.88787	5818.1	21.8
					9.4	3.39213	1.83123	0.892494	5975	22
					9.42	3.36964	1.83429	0.870651	5740.18	22.3
					9.44	3.47413	1.87738	0.944306	5417.1	22.6
					9.46	3.41817	1.90793	0.888881	5176.82	22.9
					9.48	3.48209	1.77823	0.909555	5136.5	23.2
					9.5	3.4489	1.82145	0.867223	5306.53	23.5
					9.52	3.31299	1.74511	0.92377	5383.3	23.8
					9.54	3.44047	1.80144	0.883605	5261.05	24.1
					9.56	3.43131	1.93307	0.904386	5064.38	24.4
					9.58	3.61004	1.87604	0.833279	4933.93	24.7
					9.6	3.3904	1.75874	0.866083	4857.98	25
					9.62	3.36425	1.80641	0.849481	4813.72	25.2
					9.64	3.2841	1.95153	0.875203	4811.33	25.4
					9.66	3.543	1.84266	0.84653	4827.31	25.6
					9.68	3.52987	1.81111	0.868678	4833.84	25.8
					9.7	3.58456	1.90803	0.878588	4818.88	26
					9.72	3.40929	2.02985	0.836036	4877.4	26.2
					9.74	3.49347	1.98226	0.919466	4972.34	26.4
					9.76	3.52462	2.0627	0.919769	5020.89	26.6
					9.78	3.53358	1.92257	0.895506	4965.92	26.8
					9.8	3.33279	1.93726	0.876532	4906.17	27
					9.82	3.45116	1.89697	0.848215	4896.01	27.3
					9.84	3.44023	1.83014	0.89863	4902.39	27.6
					9.86	3.31865	1.90211	0.831384	4885.6	27.9
					9.88	3.40956	1.92428	0.945591	4838.19	28.2
					9.9	3.34542	2.01904	0.899147	4913.73	28.5
					9.92	3.49211	1.90235	0.874519	4973.81	28.8
					9.94	3.4507	1.94272	0.903359	4963.64	29.1
					9.96	3.44814	1.95155	0.869448	4938.23	29.4
					9.98	3.45287	1.98583	0.843596	4951.2	29.7
					10	3.48154	1.88162	0.862483	4930.13	30
					10.02	3.44873	1.99496	0.914948	4899.12	30.4
					10.04	3.57338	2.04798	0.933931	4954.17	30.8
					10.06	3.45533	2.04489	0.940314	5027.22	31.2
					10.08	3.54521	1.99484	0.920357	5048.05	31.6
					10.1	3.40041	2.09991	0.92567	5116.28	32
					10.12	3.46117	2.08601	0.911964	5007.3	32.4
					10.14	3.57235	2.12675	0.953403	4956.32	32.8
					10.16	3.65806	2.14408	0.989032	4930.89	33.2
					10.18	3.53835	2.07566	0.854051	4881.04	33.6
					10.2	3.36575	2.11138	0.967121	4979.34	34
					10.22	3.42023	2.10525	0.957256	4959.1	34.3
					10.24	3.32966	2.14868	0.93278	4958.87	34.6
					10.26	3.46341	2.11034	0.923725	4968.01	34.9
					10.28	3.54768	1.9967	0.907512	4952.9	35.2
					10.3	3.36905	2.02489	0.97395	4931.73	35.5
					10.32	3.40008	2.10185	0.960973	4940.46	35.8
					10.34	3.56056	2.1283	1.03566	4965.78	36.1
					10.36	3.36971	2.14269	0.99539	4978.58	36.4
					10.38	3.37311	2.01983	1.02145	4965.33	36.7
					10.4	3.50294	1.99216	0.991184	5009.88	37
					10.42	3.57758	2.12549	0.950229	4975.34	37.3
					10.44	3.40775	2.145	1.04166	4929.46	37.6
					10.46	3.39182	2.07534	0.951236	4906.9	37.9
					10.48	3.45945	2.11238	1.10836	4921.02	38.2
					10.5	3.49577	2.05281	0.996049	4909.05	38.5
					10.52	3.60259	2.19288	1.1004	4982.75	38.8
					10.54	3.55243	2.11769	1.12549	4951.06	39.1
					10.56	3.44657	2.08738	1.11647	4896.93	39.4
					10.58	3.63769	2.15622	1.13523	4925.3	39.7
					10.6	3.48277	2.21252	1.08323	4893.55	40
					10.62	3.50198	2.20062	1.07675	4887.11	40.6
					10.64	3.42992	2.13894	1.09502	4914.52	41.2
					10.66	3.31686	2.20428	1.11785	4938.29	41.8
					10.68	3.48879	2.14527	1.23239	4921.86	42.4
					10.7	3.48357	2.20825	1.21337	4895.43	43
					10.72	3.40472	2.31337	1.21747	4867.63	43.6
					10.74	3.3013	2.25861	1.31035	4860.36	44.2
					10.76	3.21411	2.31424	1.17625	4853.92	44.8
					10.78	3.54154	2.14526	1.24615	4836.51	45.4
					10.8	3.47469	1.99908	1.19066	4897.41	46
					10.82	3.14848	2.04446	1.28872	5054.45	46.6
					10.84	3.33672	2.14004	1.21566	5100.95	47.2
					10.86	3.32691	2.08914	1.13582	5045.53	47.8
					10.88	3.32332	2.09773	1.18755	4950.51	48.4
					10.9	3.23715	2.27396	1.12825	4870.46	49
					10.92	3.27802	2.29437	1.13724	4957.72	49.6
					10.94	3.29121	2.19467	1.11511	4979.06	50.2
					10.96	3.18144	2.35235	1.18661	4980.9	50.8
					10.98	3.3153	2.37915	1.12807	5042.42	51.4
					11	3.06578	2.33162	1.17099	5010.53	52
					11.02	3.21915	2.43109	1.18226	4947.35	51.5
					11.04	3.22141	2.50636	1.21597	4955.68	51
					11.06	3.10293	2.42738	1.10265	4997.6	50.5
					11.08	3.23477	2.21838	1.10919	5046.96	50
					11.1	3.16488	1.96753	1.01514	5377.79	49.5
					11.12	3.1206	1.85427	0.9455	5678	49
					11.14	3.25805	1.60275	0.943632	5604	48.5
					11.16	3.21599	1.70334	0.863312	5286.42	48
					11.18	3.32058	1.69153	0.81598	5004.62	47.5
					11.2	3.26669	1.64817	0.879992	5120.45	47
					11.22	3.52068	1.7671	0.927167	5154.96	46.2
					11.24	3.60614	1.90172	0.992393	5253.73	45.4
					11.26	3.4265	1.9521	1.03843	5401.66	44.6
					11.28	3.42329	2.1519	0.989088	5535.45	43.8
					11.3	3.34748	2.25957	1.13594	5571.01	43
					11.32	3.29466	2.15886	1.06751	5430.59	42.2
					11.34	3.31133	2.17893	1.06995	5338.54	41.4
					11.36	3.11195	2.19354	1.1416	5266.2	40.6
					11.38	3.16412	2.33631	1.13001	5135.05	39.8
					11.4	3.00973	2.22309	1.10491	4988.22	39
					11.42	3.04424	2.17	1.04707	4962.35	38.5
					11.44	3.0764	2.10922	0.986426	5053.43	38
					11.46	3.11825	2.01735	0.99576	5161.18	37.5
					11.48	3.17974	2.01242	0.986775	5210.57	37
					11.5	3.1093	2.01092	0.957666	5479.11	36.5
					11.52	3.1821	1.87578	0.928967	5464.74	36
					11.54	3.25677	1.89011	0.908003	5501.29	35.5
					11.56	3.2958	1.89594	0.879121	5505.62	35
					11.58	3.48788	2.03057	0.847672	5343.5	34.5
					11.6	3.42219	1.90462	0.914323	5261.63	34
					11.62	3.50108	1.99601	0.828045	5210.66	33.7
					11.64	3.33575	1.87237	0.911735	5110.3	33.4
					11.66	3.30962	2.02996	0.856374	5006.25	33.1
					11.68	3.29412	1.97137	0.939586	4970.75	32.8
					11.7	3.52025	1.93333	0.858193	5004.79	32.5
					11.72	3.61993	1.90994	0.881308	5027.33	32.2
					11.74	3.4064	1.96622	0.876403	4979.71	31.9
					11.76	3.45713	1.98073	0.921412	4934	31.6
					11.78	3.54039	2.00259	0.972662	4975.7	31.3
					11.8	3.42809	2.0892	0.998684	5012.79	31
					11.82	3.53419	2.07628	1.05837	5031.88	31.3
					11.84	3.47687	1.99063	1.07782	4992.44	31.6
					11.86	3.49896	2.11816	1.0436	4934.32	31.9
					11.88	3.47194	2.04754	1.06374	4909.61	32.2
					11.9	3.55705	2.13316	1.07941	4881.22	32.5
					11.92	3.59548	2.18348	1.09086	4802.53	32.8
					11.94	3.42757	2.10207	1.09535	4833.48	33.1
					11.96	3.61364	2.00166	1.06624	4897.58	33.4
					11.98	3.37285	2.15239	1.14161	4872.2	33.7
					12	3.55635	2.21835	1.16505	4808.07	34
					12.02	3.40466	1.9675	1.07398	4844.32	35.1
					12.04	3.58607	1.98454	1.21352	4854.94	36.2
					12.06	3.35979	2.03091	1.45946	4841.94	37.3
					12.08	3.32572	2.02758	1.3109	4841.89	38.4
					12.1	3.44721	1.9726	1.30314	4858.73	39.5
					12.12	3.36514	2.20047	1.3235	4888.48	40.6
					12.14	3.35922	2.13496	1.30678	4916.51	41.7
					12.16	3.37076	2.24166	1.36505	4931.98	42.8
					12.18	3.10579	2.24686	1.30318	4939.49	43.9
					12.2	3.14199	2.09006	1.29987	5048.18	45
					12.22	3	2.03945	1.29174	4952.56	46.5
					12.24	3.18813	1.91522	1.27139	4826.66	48
					12.26	3.01574	2.02287	1.236	4858.67	49.5
					12.28	3.0422	1.9695	1.18651	5186.3	51
					12.3	3.08365	1.99982	1.26658	5562.77	52.5
					12.32	3.04455	2.12129	1.17733	5614.62	54
					12.34	3.0474	2.38933	1.20473	5734.26	55.5
					12.36	2.99563	2.37274	1.14788	5658.24	57
					12.38	2.9959	2.35441	1.13113	5099.46	58.5
					12.4	2.93173	2.32524	1.13353	5047.78	60
					12.42	2.90907	2.24572	1.00926	5576.01	60.4
					12.44	2.99202	2.05998	0.938124	5815.82	60.8
					12.46	3.20442	1.94253	0.974281	5789.57	61.2
					12.48	3.39741	1.83923	0.927894	5753.74	61.6
					12.5	3.43304	1.94278	0.977576	5458.88	62
					12.52	3.61775	2.03648	1.06804	5289.91	62.4
					12.54	3.50033	2.12638	1.0065	5104.57	62.8
					12.56	3.51002	2.15028	0.999948	4882	63.2
					12.58	3.12307	2.14229	0.999677	4680.07	63.6
					12.6	3.19434	2.04912	0.957155	4867.09	64
					12.62	3.35461	1.86611	0.947097	5022.32	62.5
					12.64	3.61437	1.90669	0.989213	5176.26	61
					12.66	3.61394	2.08071	1.08909	5199.83	59.5
					12.68	3.41999	2.19254	1.12148	4965.93	58
					12.7	3.20292	2.23111	1.11203	4752.81	56.5
					12.72	3.3048	2.19094	1.12505	4782.16	55
					12.74	3.03627	2.11278	1.14774	4924.64	53.5
					12.76	3.04288	2.10775	0.976676	5067.01	52
					12.78	3.32009	1.9232	1.00948	5116.29	50.5
					12.8	3.65328	1.67951	0.905261	5139.69	49
					12.82	3.80718	1.72287	0.908339	5062.41	47.9
					12.84	3.55095	1.71968	0.931415	4829.36	46.8
					12.86	3.73901	1.86982	0.874654	4620.3	45.7
					12.88	3.70634	1.83616	0.895083	4653.93	44.6
					12.9	3.70276	1.83778	0.867121	4727.85	43.5
					12.92	3.65494	1.96091	0.822169	4656.4	42.4
					12.94	3.38426	2.15214	0.947816	4663.38	41.3
					12.96	3.27298	2.15984	0.983401	4741.6	40.2
					12.98	3.21952	2.2292	1.03999	4816.52	39.1
					13	3.03485	2.41625	1.06576	4957.98	38
					13.02	3.18107	2.21353	1.02377	5157.16	37.8
					13.04	3.10099	2.26683	0.995366	5322.23	37.6
					13.06	3.23672	2.12994	1.09171	5359.89	37.4
					13.08	3.52749	2.22204	1.09891	5207.74	37.2
					13.1	3.52053	2.29575	1.13171	5045.47	37
					13.12	3.3163	2.34257	1.16594	4899.9	36.8
					13.14	3.41537	2.32836	1.09518	4733.37	36.6
					13.16	3.28985	2.0817	1.10875	4651.31	36.4
					13.18	3.23464	2.19834	1.03907	4776.25	36.2
					13.2	3.29216	1.98956	0.999663	4957.18	36
					13.22	3.52097	1.87345	0.907881	5220.08	36.2
					13.24	3.5041	1.9884	1.04137	5338.5	36.4
					13.26	3.56265	1.84115	1.04152	5213.75	36.6
					13.28	3.48851	1.91611	0.958923	4843.82	36.8
					13.3	3.51322	2.06608	1.04703	4605.49	37
					13.32	3.45035	2.04753	1.02157	4636.56	37.2
					13.34	3.54761	2.09575	1.02665	4787.44	37.4
					13.36	3.3915	2.33635	1.10624	4908.63	37.6
					13.38	3.19345	2.3764	1.08026	4870.1	37.8
					13.4	3.16491	2.37931	1.1104	4781.13	38
					13.42	3.18176	2.24797	1.08325	4771.61	38.4
					13.44	3.13408	2.18993	1.0112	4726.81	38.8
					13.46	3.02999	2.10744	0.952855	4684.07	39.2
					13.48	3.10447	2.13156	0.951924	4727.97	39.6
					13.5	3.35868	2.24653	0.932569	4848.11	40
					13.52	3.33799	2.27536	0.959101	5056.75	40.4
					13.54	3.17432	2.30434	1.02971	5327.49	40.8
					13.56	3.33171	2.30288	1.02293	5509.85	41.2
					13.58	3.23734	2.18238	0.993809	5463.64	41.6
					13.6	3.09974	2.00152	0.96792	5595.8	42
					13.62	3.04162	1.98608	0.937562	5345.66	42.4
					13.64	3.28568	1.99279	0.937732	4981.26	42.8
					13.66	3.30711	1.90697	0.97909	4777.07	43.2
					13.68	3.36494	1.87431	0.996468	4952.11	43.6
					13.7	3.4698	1.84539	1.00241	5073.06	44
					13.72	3.39019	2.08454	1.01013	5374.73	44.4
					13.74	3.25915	2.21733	1.11172	5595.03	44.8
					13.76	3.24197	2.29993	1.11172	5696.37	45.2
					13.78	3.36603	2.31373	1.21969	5727.5	45.6
					13.8	3.24164	2.1995	1.1336	5672.88	46
					13.82	3.24565	2.12947	1.05735	5281.87	46.1
					13.84	3.06772	2.18439	1.13365	4912.98	46.2
					13.86	3.11786	2.2028	1.08197	4625.9	46.3
					13.88	3.11959	2.25368	1.0072	4397.11	46.4
					13.9	3.08372	2.1781	1.0715	4560.71	46.5
					13.92	3.26168	2.04534	0.963835	4632.27	46.6
					13.94	3.15146	2.0997	0.986978	4937.86	46.7
					13.96	3.19188	2.20819	1.05226	5331.17	46.8
					13.98	3.245	2.16327	0.966179	5514.6	46.9
					14	3.21634	2.062	0.946534	5662.66	47
					14.02	3.28712	2.2681	0.982322	5807.55	47
					14.04	3.18983	2.18882	1.00869	5919.3	47
					14.06	3.09735	2.09207	0.987557	5874.99	47
					14.08	3.25881	2.21742	1.05712	5521.99	47
					14.1	3.21028	2.09815	1.0399	4781.91	47
					14.12	3.17151	2.16689	1.07042	4512.9	47
					14.14	3.28762	2.22228	1.05133	4490.59	47
					14.16	3.32915	2.19816	1.008	4546.81	47
					14.18	3.25462	2.11977	0.971488	4558.83	47
					14.2	3.34024	2.08453	0.963235	4818.12	47
					14.22	3.1766	1.9847	0.87082	5038.48	46.5
					14.24	3.21589	2.01467	0.940006	5319.25	46
					14.26	3.25359	2.08683	0.916702	5585.92	45.5
					14.28	3.15099	2.05691	0.941475	5706.3	45
					14.3	3.36515	2.06444	0.948029	5749.46	44.5
					14.32	3.41091	1.98319	0.971648	5741.53	44
					14.34	3.33968	1.95569	0.957815	5659.03	43.5
					14.36	3.49343	1.9047	0.895327	5528.75	43
					14.38	3.54654	1.95751	0.934797	5374.97	42.5
					14.4	3.29046	1.97102	0.946234	4882.58	42
					14.42	3.47955	2.04831	0.962208	4709.91	42
					14.44	3.53207	2.08492	0.916971	4802.26	42
					14.46	3.33156	2.07924	0.928133	4939.97	42
					14.48	3.35866	2.11001	0.921884	4870.07	42
					14.5	3.24387	2.01517	0.87194	5029.83	42
					14.52	3.27185	2.16934	0.897813	5235.65	42
					14.54	3.19312	2.09179	0.957088	5350.25	42
					14.56	3.22818	2.17313	0.97679	5222.15	42
					14.58	3.4481	2.09444	0.951087	4761.45	42
					14.6	3.32476	2.23458	0.885092	4659.13	42
					14.62	3.35496	2.08248	0.958672	4701.58	42
					14.64	3.45149	2.24048	0.962614	4760.24	42
					14.66	3.23074	2.33914	0.982459	4798.59	42
					14.68	3.43742	2.35017	0.9998	4833.19	42
					14.7	3.19326	2.23676	0.975402	5047.65	42
					14.72	3.1155	2.21381	0.98349	5256.01	42
					14.74	3.24621	2.14518	0.972126	5407.7	42
					14.76	3.14728	2.30653	0.919849	5526.75	42
					14.78	3.0934	2.3125	0.926571	5654.66	42
					14.8	3.1619	2.07087	0.918447	5582.99	42
					14.82	3.17191	2.08823	0.784408	5423.89	42.5
					14.84	3.15383	2.12178	0.803587	5377.05	43
					14.86	3.2571	1.94814	0.829586	5413.19	43.5
					14.88	3.19208	2.02639	0.826883	5397.47	44
					14.9	3.26266	1.91276	0.843611	5314.19	44.5
					14.92	3.2558	1.77543	0.773808	5046.84	45
					14.94	3.24348	1.68497	0.708174	4830.47	45.5
					14.96	3.27267	1.77067	0.684938	4735.76	46
					14.98	3.16663	1.75726	0.687317	4750.05	46.5
					15	3.38427	1.72298	0.707907	4809.27	47
					15.02	3.17124	1.83779	0.775618	4829	47
					15.04	3.34241	1.85141	0.794309	5051.88	47
					15.06	3.2359	1.93631	0.851897	5354.58	47
					15.08	3.07788	1.98297	0.789429	5464.06	47
					15.1	3.1194	1.93969	0.852762	5582.92	47
					15.12	3.10363	1.99566	0.873502	5574.07	47
					15.14	3.15436	2.04209	0.808686	5493.13	47
					15.16	3.0756	1.99167	0.904891	5431.05	47
					15.18	3.30131	2.09069	0.876564	5482.19	47
					15.2	3.42719	1.9377	0.943985	5491.6	47
					15.22	3.37326	1.85961	0.883516	5545.1	46.6
					15.24	3.3547	1.89476	0.841103	5611.33	46.2
					15.26	3.45896	1.78641	0.741249	5580.96	45.8
					15.28	3.33506	1.74613	0.710969	5326.84	45.4
					15.3	3.21092	1.66116	0.681765	5075.46	45
					15.32	3.34551	1.60927	0.723576	4886.94	44.6
					15.34	3.33046	1.69154	0.808601	4885.7	44.2
					15.36	3.28154	1.72642	0.777424	4992.99	43.8
					15.38	3.19426	1.89498	0.87276	5044.57	43.4
					15.4	3.28006	2.03131	0.950805	5291.94	43
					15.42	3.33227	2.13403	0.843477	5405.32	42.3
					15.44	3.17835	2.20765	0.922124	5503.35	41.6
					15.46	3.03889	1.98663	0.912508	5594.08	40.9
					15.48	3.15613	2.1213	0.917125	5642.2	40.2
					15.5	3.05643	2.15657	0.921494	5781.35	39.5
					15.52	3.1852	2.02689	0.922313	5735.35	38.8
					15.54	3.23649	2.01366	0.931585	5461.81	38.1
					15.56	3.44874	1.95428	0.854033	5049.31	37.4
					15.58	3.31105	2.0015	0.887443	4672.46	36.7
					15.6	3.29354	1.96809	0.852078	4639.75	36
					15.62	3.38002	2.07069	0.869456	4767.83	35.5
					15.64	3.38863	2.05448	0.863279	4854.14	35
					15.66	3.32422	2.11753	0.881173	4896.69	34.5
					15.68	3.3672	2.07461	0.87751	4990.57	34
					15.7	3.25037	2.0222	0.863024	5026.4	33.5
					15.72	3.24562	2.05808	0.933527	5131.88	33
					15.74	3.39876	2.01939	0.936229	5238.21	32.5
					15.76	3.29968	2.08039	0.969582	5306.29	32
					15.78	3.25334	2.02858	0.910145	5315.82	31.5
					15.8	3.34244	2.14782	0.895304	5307.5	31
					15.82	3.44698	2.10436	0.96341	5420.55	30.9
					15.84	3.42996	2.17196	0.973485	5376.55	30.8
					15.86	3.28939	1.89171	0.897593	5155.05	30.7
					15.88	3.35807	2.01055	0.939584	4887.74	30.6
					15.9	3.52312	1.91267	0.86483	4822.57	30.5
					15.92	3.54869	2.00063	0.871491	4792.75	30.4
					15.94	3.53846	1.86441	0.933113	4794.95	30.3
					15.96	3.64517	1.8418	0.864188	4803.55	30.2
					15.98	3.60583	1.86341	0.90168	4781.12	30.1
					16	3.45838	1.95538	0.945597	4737.47	30
					16.02	3.3075	2.02423	0.897163	4845.05	30
					16.04	3.42248	2.0929	0.852987	4827.97	30
					16.06	3.33312	2.12271	0.963513	4696.31	30
					16.08	3.36044	2.09859	0.967284	4623.67	30
					16.1	3.34299	2.20068	0.946521	4685.29	30
					16.12	3.36871	2.23752	0.990108	4749.05	30
					16.14	3.28753	2.23156	1.0263	4788.1	30
					16.16	3.1812	2.25842	0.995202	4761.62	30
					16.18	3.28384	2.34294	1.01835	4638.45	30
					16.2	3.1162	2.43426	1.02543	4717.81	30
					16.22	3.40813	2.31371	1.0062	4720.43	29.5
					16.24	3.35249	2.36649	1.00853	4704.7	29
					16.26	3.45765	2.26694	1.02414	4688.72	28.5
					16.28	3.4475	2.20652	0.994357	4675.5	28
					16.3	3.52517	2.26418	0.970757	4793.89	27.5
					16.32	3.46331	2.09266	0.959098	4777.18	27
					16.34	3.61416	2.11107	0.972619	4801.86	26.5
					16.36	3.45729	2.17409	0.958013	4858.23	26
					16.38	3.65674	2.11138	0.849964	4846.35	25.5
					16.4	3.43833	2.08741	0.967475	5074.08	25
					16.42	3.49591	2.04797	0.9957	5019.18	24.6
					16.44	3.45983	2.04943	0.998921	5073.85	24.2
					16.46	3.4436	2.1154	0.984626	5232.04	23.8
					16.48	3.4763	2.10431	0.982447	5267.15	23.4
					16.5	3.44281	2.07598	0.981491	5510.86	23
					16.52	3.38239	2.12232	1.00665	5564.35	22.6
					16.54	3.40968	2.11568	0.928537	5532.83	22.2
					16.56	3.62634	2.11723	0.950614	5460.99	21.8
					16.58	3.43079	2.12459	0.98818	5367.98	21.4
					16.6	3.45632	2.18689	0.950615	5411.86	21
					16.62	3.51579	2.01006	0.988011	5118.26	21.2
					16.64	3.54919	1.94962	0.921795	4740.7	21.4
					16.66	3.52011	2.0735	0.922288	4548.09	21.6
					16.68	3.68781	2.00063	0.906533	4795.14	21.8
					16.7	3.6098	2.04234	0.881361	5014.33	22
					16.72	3.70203	2.03508	0.864199	4991.05	22.2
					16.74	3.77828	1.95851	0.862687	4744.27	22.4
					16.76	3.68216	1.98697	0.890126	4500.56	22.6
					16.78	3.72149	1.8866	0.867302	4609.44	22.8
					16.8	3.56782	2.00149	0.863629	4856.6	23
					16.82	3.92784	1.99564	0.887268	5092.71	23.1
					16.84	3.75884	2.05754	0.894124	5322.06	23.2
					16.86	3.63669	2.12688	0.873557	5365.76	23.3
					16.88	3.75565	1.90507	0.977281	4953.61	23.4
					16.9	3.80979	2.0423	0.869473	4591.24	23.5
					16.92	3.62646	1.89992	0.864653	4645.49	23.6
					16.94	3.74088	1.88043	0.886377	4840.82	23.7
					16.96	3.87185	1.84259	0.880905	5001.33	23.8
					16.98	3.91868	1.90663	0.852587	5005.76	23.9
					17	3.76529	1.90822	0.780895	4736.5	24
					17.02	3.82416	1.70554	0.817502	4709.01	23.9
					17.04	3.68625	1.82577	0.932165	4812.72	23.8
					17.06	3.80367	1.93931	0.892313	4814.01	23.7
					17.08	3.88907	1.8773	0.899418	4429.74	23.6
					17.1	3.72218	1.90461	0.917352	4407.27	23.5
					17.12	3.96517	1.81283	0.795217	4425.23	23.4
					17.14	3.8908	1.79974	0.910013	4520.54	23.3
					17.16	3.75051	1.90741	0.894737	4684.06	23.2
					17.18	3.77978	1.90636	0.859843	4861.61	23.1
					17.2	3.75178	1.79465	0.841694	4706.59	23
					17.22	3.84752	1.65463	0.831677	4543.87	22.8
					17.24	3.65865	1.83319	0.816914	4594.64	22.6
					17.26	3.91381	1.86508	0.839866	4774.92	22.4
					17.28	3.79882	1.7466	0.845693	4797.44	22.2
					17.3	3.80711	1.73233	0.840475	4851.57	22
					17.32	3.72226	1.73595	0.847515	4862.93	21.8
					17.34	3.7762	1.74894	0.782266	4838.05	21.6
					17.36	3.69795	1.73944	0.834351	4699.18	21.4
					17.38	3.80152	1.85648	0.799805	4334.7	21.2
					17.4	3.81459	1.72603	0.826912	4371.07	21
					17.42	3.6891	1.78144	0.838439	4487.6	21.1
					17.44	3.62832	1.80367	0.889549	4557.01	21.2
					17.46	3.70391	1.84221	0.87715	4565.81	21.3
					17.48	3.83376	1.71085	0.872604	4575.85	21.4
					17.5	3.74555	1.83156	0.866355	4525.17	21.5
					17.52	3.61299	1.77367	0.805266	4721.18	21.6
					17.54	3.54413	1.83094	0.87633	4806.85	21.7
					17.56	3.65451	1.91006	0.87664	4664.71	21.8
					17.58	3.64357	1.92614	0.917256	4359.73	21.9
					17.6	3.66511	1.89266	0.824456	4388.17	22
					17.62	3.71466	1.78778	0.817214	4559.21	22.1
					17.64	3.87573	1.81027	0.789092	4724.35	22.2
					17.66	3.80301	1.81346	0.86106	4785.7	22.3
					17.68	3.78937	1.82574	0.900418	4685.04	22.4
					17.7	3.67725	1.72954	0.872509	4537.87	22.5
					17.72	3.76886	1.80048	0.821034	4677.32	22.6
					17.74	3.72227	1.7674	0.808174	4698.57	22.7
					17.76	3.53239	1.84743	0.887663	4525.79	22.8
					17.78	3.39467	1.84908	0.824406	4330.67	22.9
					17.8	3.78273	1.82403	0.797952	4477.27	23
					17.82	3.63072	1.79983	0.798304	4875.67	23
					17.84	3.66153	1.76783	0.808178	4994.48	23
					17.86	3.66321	1.64061	0.820791	4757.48	23
					17.88	3.49817	1.72291	0.740177	4429.24	23
					17.9	3.39459	1.69323	0.790754	4317.93	23
					17.92	3.59633	1.72192	0.772972	4496.55	23
					17.94	3.51297	1.68513	0.744723	4761.21	23
					17.96	3.57728	1.72042	0.752803	5009.62	23
					17.98	3.54768	1.63448	0.722015	5197.04	23
					18	3.9259	1.6942	0.718869	4775.53	23
					18.02	3.6165	1.74592	0.766803	4547.21	23
					18.04	3.71408	1.66317	0.729127	4582.62	23
					18.06	3.53527	1.74894	0.757432	4806.46	23
					18.08	3.52357	1.71498	0.846134	5014.21	23
					18.1	3.64054	1.90934	0.83023	4662.83	23
					18.12	3.64107	1.87219	0.802503	4490.23	23
					18.14	3.69312	1.85608	0.906947	4596.92	23
					18.16	3.63487	1.8652	0.73443	4779.15	23
					18.18	3.707	1.72942	0.839093	4600.47	23
					18.2	3.64798	1.85914	0.866748	4353.48	23
					18.22	3.71823	1.85854	0.772598	4289.83	23
					18.24	3.81315	1.91929	0.838413	4422.42	23
					18.26	3.89896	1.73256	0.751496	4624.33	23
					18.28	3.7762	1.63896	0.80536	4662.61	23
					18.3	3.88308	1.5868	0.819503	4803.55	23
					18.32	3.96153	1.71093	0.832805	4967.11	23
					18.34	3.82822	1.70125	0.767587	5123.5	23
					18.36	3.86204	1.6087	0.785571	5238.53	23
					18.38	3.80196	1.67113	0.702772	5268.13	23
					18.4	3.87091	1.6557	0.70711	4834.37	23
					18.42	3.89776	1.76749	0.867509	4614.65	23
					18.44	3.9215	1.90363	0.909818	4528.79	23
					18.46	3.95563	1.78404	0.89808	4586.33	23
					18.48	3.85167	1.79616	0.90277	4862.16	23
					18.5	3.73564	1.68078	0.86452	5031.84	23
					18.52	3.53231	1.83296	0.777335	5042.15	23
					18.54	3.59686	1.71672	0.773095	4859.79	23
					18.56	3.61431	1.7247	0.761887	4551.63	23
					18.58	3.65721	1.63804	0.810838	4276.35	23
					18.6	3.56994	1.71447	0.722635	4428.59	23
					18.62	3.54423	1.72031	0.760326	4368.37	22.9
					18.64	3.7523	1.80955	0.775665	4276.39	22.8
					18.66	3.67904	1.77762	0.812427	4287.06	22.7
					18.68	3.58164	1.80718	0.824761	4494.59	22.6
					18.7	3.66344	1.77077	0.741505	4681.3	22.5
					18.72	3.68494	1.87206	0.804865	4858.84	22.4
					18.74	3.69538	1.8954	0.801106	4814.7	22.3
					18.76	3.62783	1.81575	0.838116	4590.59	22.2
					18.78	3.75718	1.94607	0.813357	4455.88	22.1
					18.8	3.85142	2.03366	0.878666	4654.4	22
					18.82	3.65553	2.08255	0.878589	4635.07	22.4
					18.84	3.55712	1.85495	0.825418	4493.53	22.8
					18.86	3.6666	1.84459	0.801166	4385.59	23.2
					18.88	3.55816	1.71811	0.773402	4518.88	23.6
					18.9	3.72063	1.85055	0.752836	4610.49	24
					18.92	3.57914	1.70114	0.810927	4459.42	24.4
					18.94	3.55042	1.72963	0.698216	4288.08	24.8
					18.96	3.64436	1.72616	0.809293	4194.5	25.2
					18.98	3.69643	1.79129	0.764741	4169.57	25.6
					19	3.68549	1.80236	0.811706	4288.83	26
					19.02	3.62085	1.75644	0.878218	4459.08	26.1
					19.04	3.91249	1.81438	0.774058	4765.78	26.2
					19.06	3.78941	1.67161	0.853963	5046.7	26.3
					19.08	3.71275	1.6352	0.779143	4921.08	26.4
					19.1	3.52005	1.66958	0.752318	4384.34	26.5
					19.12	3.86134	1.61233	0.73148	4239.78	26.6
					19.14	3.75672	1.61629	0.742782	4396.27	26.7
					19.16	3.86601	1.49408	0.722223	4678.66	26.8
					19.18	4.1554	1.30618	0.605509	4829.57	26.9
					19.2	4.17645	1.24557	0.571935	4665.26	27
					19.22	4.12246	1.13088	0.521265	4780.08	26.5
					19.24	4.43981	1.10611	0.583159	4991.13	26
					19.26	4.13636	1.28957	0.65204	5075.19	25.5
					19.28	4.1095	1.31438	0.572908	4772.28	25
					19.3	4.01574	1.47546	0.683063	4507.17	24.5
					19.32	4.02385	1.52576	0.711234	4525.23	24
					19.34	3.77209	1.52033	0.707448	4583.99	23.5
					19.36	3.71054	1.7213	0.745689	4562.48	23
					19.38	3.77419	1.84774	0.797705	4454.43	22.5
					19.4	3.55852	1.83034	0.792299	4614.01	22
					19.42	3.5117	1.94653	0.819053	4831.05	21.7
					19.44	3.52057	1.91481	0.853724	4749.99	21.4
					19.46	3.54698	2.06388	0.832934	4393.31	21.1
					19.48	3.47681	2.01334	0.895478	4139.67	20.8
					19.5	3.37003	2.20527	0.98335	4140.81	20.5
					19.52	3.29031	2.19544	0.823165	4082	20.2
					19.54	3.18435	2.18029	0.908039	4040.06	19.9
					19.56	3.25306	2.28249	0.914404	4014.29	19.6
					19.58	3.16308	2.2132	0.9569	3926.47	19.3
					19.6	3.0146	2.23184	0.908563	3814.57	19
					19.62	3.21073	2.31377	0.912034	3702.82	19.3
					19.64	3.3546	2.14639	0.944092	3766.69	19.6
					19.66	3.1193	2.12512	0.955404	3976.68	19.9
					19.68	3.05519	2.08492	0.906399	4098.23	20.2
					19.7	3.35755	2.14916	0.890871	4193.03	20.5
					19.72	3.2052	2.06858	0.874856	4056.42	20.8
					19.74	3.29799	1.93139	0.845916	3922.88	21.1
					19.76	3.28505	2.08193	0.893262	3878.84	21.4
					19.78	3.5557	2.02633	0.94672	3862.64	21.7
					19.8	3.58207	2.00316	0.893261	3969.64	22
					19.82	3.6258	1.93623	0.860199	4040.81	23
					19.84	3.7768	1.80594	0.827194	4068.86	24
					19.86	3.72088	1.8394	0.773019	4104.94	25
					19.88	3.62144	1.86233	0.886064	4258.62	26
					19.9	3.62659	1.91317	0.806656	4307.41	27
					19.92	3.72755	1.83076	0.808742	4531.68	28
					19.94	3.64335	1.75336	0.870434	4811.75	29
					19.96	3.38713	1.86269	0.787901	5001.03	30
					19.98	3.53712	1.90836	0.781776	4923.94	31
					20	3.47306	1.96432	0.819332	4616.36	32
					20.02	3.66485	1.85328	0.858405	4339.26	32.5
					20.04	3.6677	1.85458	0.908259	4199.35	33
					20.06	3.64125	1.8531	0.764366	4227.65	33.5
					20.08	3.62731	1.93305	0.815423	4377.01	34
					20.1	3.61481	1.86675	0.79124	4336.79	34.5
					20.12	3.68587	1.80769	0.808865	4358.91	35
					20.14	3.6825	1.79372	0.76742	4413.64	35.5
					20.16	3.81814	1.69433	0.731833	4472.57	36
					20.18	3.82383	1.73974	0.760285	4510.01	36.5
					20.2	3.77705	1.78129	0.734217	4514.56	37
					20.22	3.72651	1.63898	0.780467	4580.18	36.7
					20.24	3.79458	1.64339	0.734756	4661.92	36.4
					20.26	3.75774	1.54774	0.756223	4791.36	36.1
					20.28	3.91629	1.54045	0.666716	5083.05	35.8
					20.3	4.04545	1.64717	0.733857	5280.81	35.5
					20.32	3.96391	1.53394	0.672094	5437.67	35.2
					20.34	4.10916	1.65965	0.713715	5472.44	34.9
					20.36	4.04114	1.43046	0.680663	5434.48	34.6
					20.38	4.02087	1.32607	0.648906	5522.42	34.3
					20.4	3.97747	1.41253	0.625613	5624.91	34
					20.42	3.94878	1.42159	0.685526	5536.75	33.3
					20.44	3.9199	1.49086	0.698639	5336.2	32.6
					20.46	3.92317	1.55504	0.656548	5145.15	31.9
					20.48	3.97049	1.58766	0.669559	5133.71	31.2
					20.5	4.00575	1.50546	0.68074	5229.69	30.5
					20.52	3.98454	1.64272	0.723679	5221.25	29.8
					20.54	4.00621	1.72114	0.659315	5187.91	29.1
					20.56	3.89574	1.66693	0.693433	5135	28.4
					20.58	3.97547	1.66932	0.746722	4979.93	27.7
					20.6	3.76624	1.65142	0.702112	4671.79	27
					20.62	3.7303	1.74849	0.753784	4442.73	26.4
					20.64	3.57179	1.76707	0.813906	4307.23	25.8
					20.66	3.61629	1.87352	0.707635	4311.7	25.2
					20.68	3.42624	1.86635	0.70481	4544.36	24.6
					20.7	3.47111	1.90644	0.836427	4539.27	24
					20.72	3.4823	1.95839	0.75633	4669.05	23.4
					20.74	3.39498	2.05164	0.864621	4843.57	22.8
					20.76	3.32361	1.91023	0.800441	4996.39	22.2
					20.78	3.16327	1.91829	0.716552	5096.56	21.6
					20.8	3.70338	1.80818	0.735581	5105.03	21
					20.82	3.7497	1.76719	0.723123	5139.12	21
					20.84	3.89905	1.71907	0.646045	5047.91	21
					20.86	4.45602	1.53795	0.571746	4873.23	21
					20.88	3.97142	1.46641	0.755362	4893.63	21
					20.9	4.03832	1.81722	0.708371	4956.08	21
					20.92	3.96294	1.75526	0.713794	4742.41	21
					20.94	3.97937	1.67345	0.685077	4515.96	21
					20.96	3.81466	1.615	0.744135	4408.15	21
					20.98	3.82759	1.54399	0.67927	4385.84	21
					21	3.9858	1.54885	0.714606	4514.26	21
					21.02	3.88721	1.64164	0.710415	4585.18	20.9
					21.04	3.92727	1.7033	0.777525	4499.21	20.8
					21.06	3.8975	1.59236	0.720022	4315.75	20.7
					21.08	3.86622	1.72301	0.723473	4282.67	20.6
					21.1	4.04377	1.78186	0.79808	4327.73	20.5
					21.12	3.89894	1.965	0.785376	4374.55	20.4
					21.14	3.70259	1.7527	0.900402	4399.23	20.3
					21.16	3.73773	1.72948	0.889717	4472.11	20.2
					21.18	3.84935	1.75823	0.748161	4786.84	20.1
					21.2	3.93038	1.92474	0.794865	4426.81	20
					21.22	3.88732	1.76443	0.846164	4210.93	19.9
					21.24	3.84898	1.62339	0.800487	4119.33	19.8
					21.26	4.16184	1.58128	0.725565	4119.12	19.7
					21.28	3.92976	1.60501	0.759757	4185.97	19.6
					21.3	3.91182	1.51903	0.632571	4239.23	19.5
					21.32	3.85771	1.57249	0.720682	4454.02	19.4
					21.34	3.97167	1.63148	0.744922	4582.74	19.3
					21.36	4.03203	1.73872	0.786858	4582.63	19.2
					21.38	3.98769	1.81653	0.786336	4680.31	19.1
					21.4	3.68487	1.90191	0.811454	5083.99	19
					21.42	3.65627	1.78324	0.830301	5276.66	19.3
					21.44	3.70557	1.86825	0.895368	5267.55	19.6
					21.46	3.82795	1.8349	0.874136	5059.63	19.9
					21.48	3.89463	1.76019	0.827261	4620.11	20.2
					21.5	3.86965	1.91324	0.801873	4220.63	20.5
					21.52	3.88912	1.71181	0.72699	4146.28	20.8
					21.54	3.83426	1.59559	0.746786	4117	21.1
					21.56	3.8543	1.55859	0.740817	4048.6	21.4
					21.58	3.75089	1.4779	0.683541	4141.93	21.7
					21.6	4.0311	1.49397	0.720938	4312.83	22
					21.62	4.07103	1.51219	0.739201	4406.65	22
					21.64	3.79619	1.40606	0.681192	4510.37	22
					21.66	3.92422	1.35641	0.710945	4612.09	22
					21.68	3.83721	1.59784	0.727138	4555.11	22
					21.7	3.85216	1.50969	0.747094	4425.61	22
					21.72	3.77629	1.45908	0.692342	4360.05	22
					21.74	3.83109	1.54702	0.825568	4338.18	22
					21.76	3.78782	1.47743	0.801736	4329.7	22
					21.78	3.74669	1.62344	0.713101	4295.97	22
					21.8	3.75157	1.52875	0.704018	4317.47	22
					21.82	3.73074	1.62986	0.765262	4368.69	21.7
					21.84	3.75697	1.52754	0.78931	4380.33	21.4
					21.86	3.48233	1.60232	0.714035	4404.65	21.1
					21.88	3.78166	1.77804	0.715384	4664.21	20.8
					21.9	3.71242	1.82792	0.780601	4507.19	20.5
					21.92	3.51393	1.82808	0.706898	4293.1	20.2
					21.94	3.58502	1.83931	0.770702	4221.9	19.9
					21.96	3.43048	1.85239	0.788801	4377.3	19.6
					21.98	3.39597	1.84576	0.812022	4696.18	19.3
					22	3.44356	1.89274	0.831353	5030.57	19
					22.02	3.4144	1.9132	0.855278	5089.69	19.3
					22.04	3.22385	1.8855	0.82032	4887	19.6
					22.06	3.356	1.95028	0.843285	4612.07	19.9
					22.08	3.35279	1.85274	0.774887	4698.96	20.2
					22.1	3.46516	1.79998	0.883264	4668.17	20.5
					22.12	3.44065	1.87723	0.727654	4495	20.8
					22.14	3.50594	1.72998	0.804842	4342.86	21.1
					22.16	3.49042	1.69508	0.718431	4332.35	21.4
					22.18	3.57644	1.78068	0.792574	4524.27	21.7
					22.2	3.43383	1.76251	0.725347	4501.54	22
					22.22	3.6416	1.74628	0.798194	4402.96	22.3
					22.24	3.4004	1.78999	0.750763	4348.47	22.6
					22.26	3.48502	1.78462	0.745089	4411.5	22.9
					22.28	3.67288	1.63494	0.783076	4611.34	23.2
					22.3	3.4383	1.73725	0.749496	5017.42	23.5
					22.32	3.5954	1.76551	0.732728	5122.48	23.8
					22.34	3.46732	1.68247	0.673548	4901.38	24.1
					22.36	3.6682	1.55221	0.736945	4501.96	24.4
					22.38	3.53025	1.58367	0.760391	4305.07	24.7
					22.4	3.55774	1.61053	0.741938	4570.26	25
					22.42	3.56971	1.69044	0.75279	4731.71	24.8
					22.44	3.69017	1.70895	0.71396	4678.5	24.6
					22.46	3.49294	1.63258	0.672018	4481.05	24.4
					22.48	3.59673	1.51436	0.740544	4456.79	24.2
					22.5	3.76282	1.53042	0.64569	4381.44	24
					22.52	3.77942	1.50134	0.742065	4385.96	23.8
					22.54	3.73231	1.45911	0.694998	4452.35	23.6
					22.56	3.64688	1.40737	0.709375	4562.76	23.4
					22.58	3.64386	1.49094	0.657236	4710.81	23.2
					22.6	3.68715	1.60898	0.695086	4577.46	23
					22.62	3.72122	1.67536	0.729486	4440.16	22.8
					22.64	3.64175	1.56128	0.750092	4400.1	22.6
					22.66	3.59409	1.65556	0.750987	4488.68	22.4
					22.68	3.65827	1.58199	0.749361	4651.17	22.2
					22.7	3.72004	1.66852	0.735734	4825.56	22
					22.72	3.66756	1.64415	0.666697	5109.71	21.8
					22.74	3.63248	1.56777	0.706061	5301.98	21.6
					22.76	3.6064	1.74366	0.724651	5346.64	21.4
					22.78	3.65845	1.62142	0.774072	5438.99	21.2
					22.8	3.74269	1.80075	0.767072	5434.36	21
					22.82	3.71979	1.77496	0.780088	5478.23	20.7
					22.84	3.5979	1.71303	0.740291	5358.27	20.4
					22.86	3.59653	1.7007	0.785514	4985.65	20.1
					22.88	3.88576	1.65652	0.730071	4480.94	19.8
					22.9	3.8653	1.69141	0.764295	4653.17	19.5
					22.92	3.67284	1.67429	0.729079	4667.92	19.2
					22.94	3.94115	1.6341	0.743484	4707.21	18.9
					22.96	3.60491	1.66987	0.75407	4859.63	18.6
					22.98	3.76068	1.62474	0.652425	4994.36	18.3
					23	3.70785	1.59942	0.739319	5084.37	18
					23.02	3.82394	1.69412	0.717119	5134.96	18.1
					23.04	3.67374	1.80915	0.757479	5173.19	18.2
					23.06	3.67205	1.91644	0.700898	5156.78	18.3
					23.08	3.58802	1.81491	0.806955	4914.87	18.4
					23.1	3.62465	1.85198	0.708807	4775.93	18.5
					23.12	3.65752	1.65166	0.741623	4711.01	18.6
					23.14	3.56988	1.79471	0.759951	4717.4	18.7
					23.16	3.69056	1.75677	0.895744	4714.55	18.8
					23.18	3.77015	1.73066	0.750185	4479.11	18.9
					23.2	3.64601	1.88368	0.759596	4711.4	19
					23.22	3.60842	1.69968	0.771318	4784.54	19.2
					23.24	3.79297	1.79647	0.786833	4602.37	19.4
					23.26	3.61741	1.77925	0.773281	4328.98	19.6
					23.28	3.83337	1.85253	0.755286	4535.55	19.8
					23.3	3.74385	1.8826	0.68395	4755.76	20
					23.32	3.80734	1.85835	0.735367	4619.2	20.2
					23.34	3.72834	1.75405	0.757727	4459.63	20.4
					23.36	3.82195	1.69588	0.795883	4507.98	20.6
					23.38	3.84137	1.79123	0.729243	4774.78	20.8
					23.4	3.67213	1.88766	0.764077	5006.17	21
					23.42	3.79066	1.87054	0.785325	5130.73	21.1
					23.44	3.86278	1.81173	0.782404	4963.45	21.2
					23.46	3.80069	1.89096	0.756976	4593.02	21.3
					23.48	3.62588	1.99279	0.80211	4621.75	21.4
					23.5	3.90004	1.94755	0.798587	4804.06	21.5
					23.52	3.62518	1.83693	0.833881	4970.62	21.6
					23.54	3.70301	1.99959	0.830734	5028.09	21.7
					23.56	3.56007	1.95497	0.854875	4894.61	21.8
					23.58	3.77698	1.9066	0.798854	4480.84	21.9
					23.6	3.70509	1.88938	0.796736	4646.84	22
					23.62	3.54404	1.9118	0.772629	4820.33	22.1
					23.64	3.63682	1.8739	0.753264	4893.71	22.2
					23.66	3.61241	1.78386	0.782901	4865.38	22.3
					23.68	3.95242	1.81332	0.823712	4871.35	22.4
					23.7	3.64861	1.66398	0.67719	4998.58	22.5
					23.72	3.76411	1.6117	0.710578	4985.2	22.6
					23.74	3.82958	1.61724	0.727507	4983.56	22.7
					23.76	3.79438	1.53598	0.68904	5041.87	22.8
					23.78	3.65798	1.68528	0.682555	4974.68	22.9
					23.8	3.86161	1.5703	0.775925	4629.13	23
					23.82	3.82672	1.68797	0.709493	4629.03	22.7
					23.84	3.85162	1.6137	0.710627	4854.96	22.4
					23.86	3.76781	1.7736	0.695996	5064.45	22.1
					23.88	3.71924	1.75175	0.686577	4836.97	21.8
					23.9	3.79674	1.889	0.774181	4457.45	21.5
					23.92	3.80929	1.91191	0.768214	4434.05	21.2
					23.94	3.83482	1.81951	0.72178	4581.12	20.9
					23.96	3.78557	1.82793	0.770425	4732.03	20.6
					23.98	3.96852	1.79329	0.696299	4845.75	20.3
					24	3.92061	1.79249	0.813513	4862.92	20
					24.02	3.91236	1.76363	0.802985	4870.81	19.9
					24.04	3.72493	1.76559	0.776312	4877.16	19.8
					24.06	3.81127	1.67968	0.72366	4827.34	19.7
					24.08	3.90356	1.75331	0.773081	4545.24	19.6
					24.1	3.94048	1.7419	0.752294	4348.54	19.5
					24.12	3.92286	1.85991	0.660667	4326.56	19.4
					24.14	4.09682	1.63081	0.698773	4386.33	19.3
					24.16	3.93684	1.65242	0.716994	4445.1	19.2
					24.18	4.08163	1.65241	0.755769	4462.24	19.1
					24.2	3.95298	1.68069	0.739342	4715.68	19
					24.22	3.89495	1.6114	0.700346	5001.13	19.2
					24.24	3.90764	1.68449	0.747316	5208.58	19.4
					24.26	3.86754	1.89267	0.719055	5275.21	19.6
					24.28	3.79426	1.6724	0.767193	5208.07	19.8
					24.3	3.93091	1.66711	0.705433	5268.68	20
					24.32	3.81257	1.69539	0.705743	4887.6	20.2
					24.34	3.78019	1.58006	0.761146	4460.71	20.4
					24.36	3.83395	1.66705	0.700645	4325.31	20.6
					24.38	3.88169	1.49361	0.685892	4584.55	20.8
					24.4	3.86794	1.62572	0.660066	4862.34	21
					24.42	3.72186	1.52901	0.697301	4672.96	21
					24.44	3.75896	1.64902	0.73234	4367.67	21
					24.46	3.86181	1.7572	0.723026	4243.85	21
					24.48	3.82679	1.68215	0.782373	4380.83	21
					24.5	3.87314	1.7361	0.734161	4591.16	21
					24.52	3.89881	1.7451	0.738692	4820.54	21
					24.54	3.68674	1.72427	0.741804	4969.17	21
					24.56	3.88128	1.63365	0.727509	4921.44	21
					24.58	3.87358	1.76947	0.773897	4509.83	21
					24.6	3.75611	1.73793	0.70588	4410.47	21
					24.62	3.71834	1.5953	0.681139	4508.2	21.2
					24.64	3.74293	1.47661	0.66765	4651.3	21.4
					24.66	3.65153	1.52301	0.618788	4735.33	21.6
					24.68	3.81886	1.44769	0.679946	4755.02	21.8
					24.7	3.74409	1.38538	0.668042	4600.4	22
					24.72	3.84559	1.53466	0.639359	4380.77	22.2
					24.74	3.58318	1.45047	0.706639	4285.82	22.4
					24.76	3.70392	1.57115	0.712688	4391.24	22.6
					24.78	3.63846	1.62437	0.714802	4526.73	22.8
					24.8	3.60483	1.47037	0.621068	4875.36	23
					24.82	3.68076	1.5264	0.703575	4743.94	23.2
					24.84	3.68604	1.70601	0.672304	4451.49	23.4
					24.86	3.80676	1.55116	0.717599	4312.04	23.6
					24.88	3.71493	1.59819	0.742821	4465.85	23.8
					24.9	3.71216	1.77065	0.716294	4552.55	24
					24.92	3.67659	1.69189	0.779354	4439.4	24.2
					24.94	3.65642	1.68322	0.692745	4376.2	24.4
					24.96	3.51349	1.552	0.772076	4486.17	24.6
					24.98	3.43862	1.67823	0.742708	4559.64	24.8
					25	3.6605	1.63717	0.708016	4718.9	25
					25.02	3.64578	1.61965	0.666628	4830.84	25.3
					25.04	3.56521	1.59897	0.688744	4749.88	25.6
					25.06	3.52989	1.70525	0.765463	4487.3	25.9
					25.08	3.62362	1.72387	0.716741	4414.33	26.2
					25.1	3.5088	1.71872	0.719305	4367.58	26.5
					25.12	3.49629	1.73982	0.724927	4410.69	26.8
					25.14	3.49761	1.75454	0.732773	4600.63	27.1
					25.16	3.66949	1.73672	0.715295	4913.16	27.4
					25.18	3.7086	1.86984	0.807055	5147.34	27.7
					25.2	3.63849	1.67573	0.726409	5155.93	28
					25.22	3.58934	1.7697	0.774859	4773.05	28
					25.24	3.5408	1.81571	0.724326	4507.26	28
					25.26	3.56312	1.88453	0.845462	4614.56	28
					25.28	3.61023	1.85804	0.700979	4650.2	28
					25.3	3.68436	1.95905	0.721336	4358.93	28
					25.32	3.48377	1.83252	0.775447	4346.15	28
					25.34	3.68984	1.81395	0.750634	4521.39	28
					25.36	3.46833	1.88359	0.754802	4768.16	28
					25.38	3.71749	1.75763	0.745898	5066.67	28
					25.4	3.65887	1.86679	0.879007	5225.17	28
					25.42	3.47248	1.9434	0.802665	4963.88	27.7
					25.44	3.71053	1.90137	0.804839	4547.38	27.4
					25.46	3.7152	2.02681	0.815338	4250.93	27.1
					25.48	3.5354	1.82415	0.854767	4253.54	26.8
					25.5	3.59033	1.88005	0.877031	4281.79	26.5
					25.52	3.76254	1.8792	0.809815	4354.26	26.2
					25.54	3.6553	1.93986	0.762052	4447.06	25.9
					25.56	3.75469	1.75324	0.803041	4546.27	25.6
					25.58	3.70046	1.8822	0.769238	4675.55	25.3
					25.6	3.73139	1.74767	0.770026	4901.12	25
					25.62	3.78257	1.81958	0.758724	5029.79	24.9
					25.64	3.70028	1.81246	0.727525	5023.79	24.8
					25.66	3.94406	1.7565	0.775209	4927.39	24.7
					25.68	3.91805	1.7719	0.831611	4942.28	24.6
					25.7	3.76138	1.77092	0.720358	5096.74	24.5
					25.72	3.71923	1.74657	0.756451	5233.77	24.4
					25.74	3.63732	1.70967	0.821476	5154.25	24.3
					25.76	3.89035	1.70939	0.688133	4807.5	24.2
					25.78	3.69481	1.65497	0.74518	4493.76	24.1
					25.8	3.93444	1.79236	0.777408	4618.79	24
					25.82	3.74014	1.69028	0.74949	4860.32	24.5
					25.84	3.68422	1.83476	0.766197	5058.7	25
					25.86	3.81024	1.74336	0.686311	5096.02	25.5
					25.88	3.88515	1.66455	0.770208	4906.71	26
					25.9	3.89818	1.66216	0.790143	4945.03	26.5
					25.92	3.88663	1.69337	0.72616	4941.28	27
					25.94	3.9064	1.73614	0.790526	4888.81	27.5
					25.96	3.86915	1.51215	0.68651	4838.14	28
					25.98	3.91971	1.5525	0.709685	4919.33	28.5
					26	3.93729	1.59044	0.756126	4971.11	29
					26.02	3.73647	1.67288	0.748021	5004.81	29.7
					26.04	3.95768	1.67277	0.763413	4968.25	30.4
					26.06	3.84589	1.71813	0.743331	4881.2	31.1
					26.08	3.8255	1.68405	0.770975	4969.73	31.8
					26.1	3.80798	1.77884	0.827925	4944.32	32.5
					26.12	3.81781	1.80358	0.826264	4946.68	33.2
					26.14	3.65614	1.85193	0.81362	4979.36	33.9
					26.16	3.84216	1.79603	0.80726	5009.48	34.6
					26.18	3.75399	1.81176	0.795091	4947.82	35.3
					26.2	3.88594	1.84653	0.777119	5049.29	36
					26.22	3.76468	1.94348	0.803783	5240.33	36.6
					26.24	3.83395	1.92092	0.861343	5203.23	37.2
					26.26	3.74061	1.99643	0.81296	4828.16	37.8
					26.28	3.69441	2.0367	0.886775	4641.15	38.4
					26.3	3.7583	1.99451	0.860881	4612.21	39
					26.32	3.81921	2.14773	0.828182	4539.13	39.6
					26.34	3.74809	1.82357	0.836966	4448.53	40.2
					26.36	3.53659	1.84368	0.833433	4427.88	40.8
					26.38	3.63152	1.95334	0.854522	4674.71	41.4
					26.4	3.74268	1.78018	0.902171	4698.36	42
					26.42	3.59312	1.83913	0.762885	4629.83	42.3
					26.44	3.57157	1.77557	0.813889	4573.23	42.6
					26.46	3.57364	1.87312	0.832048	4587.9	42.9
					26.48	3.62443	1.91119	0.863671	4621.34	43.2
					26.5	3.51956	1.92808	0.846474	4823.06	43.5
					26.52	3.67156	1.95962	0.808591	4705.7	43.8
					26.54	3.57871	1.92037	0.843381	4552.27	44.1
					26.56	3.43636	1.89814	0.835814	4589.24	44.4
					26.58	3.47304	2.0568	0.797854	4644.19	44.7
					26.6	3.49632	2.07941	0.890897	4773.24	45
					26.62	3.5882	2.03889	0.875199	4847.91	44.8
					26.64	3.50382	2.17154	0.873877	4779.96	44.6
					26.66	3.4268	2.16261	0.871253	4556.45	44.4
					26.68	3.52042	2.12833	0.89442	4353.52	44.2
					26.7	3.4804	1.97838	0.859957	4395.94	44
					26.72	3.4585	2.07907	0.841527	4387.34	43.8
					26.74	3.38361	2.09556	0.888673	4355.49	43.6
					26.76	3.45773	2.06448	0.880726	4355.53	43.4
					26.78	3.52823	1.98182	0.954246	4405.62	43.2
					26.8	3.50467	2.06852	0.892266	4622.95	43
					26.82	3.3989	2.02295	0.928819	4796.92	43
					26.84	3.35469	2.00883	0.879642	4938.66	43
					26.86	3.21903	2.12233	0.908893	5025.95	43
					26.88	3.23715	2.10329	0.890256	4837.87	43
					26.9	3.42945	2.18583	0.812231	4705	43
					26.92	3.42946	2.09231	0.828478	4653.03	43
					26.94	3.17858	2.05306	0.830727	4556.71	43
					26.96	3.36335	2.06951	0.851983	4356.39	43
					26.98	3.22607	1.96712	0.855311	4238.6	43
					27	3.43296	2.06638	0.833309	4309.97	43
					27.02	3.29442	2.04403	0.87423	4348.05	42.7
					27.04	3.40047	2.10488	0.88005	4356.14	42.4
					27.06	3.44003	2.01096	0.913381	4380.25	42.1
					27.08	3.28565	2.04286	0.857295	4512.53	41.8
					27.1	3.25729	1.96295	0.831613	4583.58	41.5
					27.12	3.31103	1.8438	0.803372	4662.13	41.2
					27.14	3.3533	1.78918	0.823517	4820.78	40.9
					27.16	3.36966	1.84867	0.855141	5069.99	40.6
					27.18	3.34367	1.74547	0.825997	5230.32	40.3
					27.2	3.22537	1.95941	0.874226	5406.5	40
					27.22	3.44922	1.97875	0.866837	5488.25	39.5
					27.24	3.41062	1.92936	0.824691	5370.97	39
					27.26	3.32513	2.03131	0.822795	5047.99	38.5
					27.28	3.26672	1.90438	0.755903	4792.2	38
					27.3	3.20735	1.89573	0.798301	4668.73	37.5
					27.32	3.30724	1.86416	0.802678	4681.51	37
					27.34	3.40017	1.74929	0.764729	4853.55	36.5
					27.36	3.23991	2.0389	0.811195	5129.39	36
					27.38	3.09433	1.88106	0.823966	5211.88	35.5
					27.4	3.25668	1.98457	0.917483	5081.75	35
					27.42	3.22571	1.83136	0.875579	4650.15	34.6
					27.44	3.26371	1.98126	0.845086	4318.46	34.2
					27.46	3.20963	2.06413	0.806724	4370.72	33.8
					27.48	3.2003	1.95468	0.74979	4477.94	33.4
					27.5	3.16968	1.91783	0.81538	4601.57	33
					27.52	3.28325	1.90477	0.847702	4646.6	32.6
					27.54	3.27851	1.95443	0.772964	4594.86	32.2
					27.56	3.19882	1.82425	0.743487	4500.76	31.8
					27.58	3.26899	1.95511	0.76281	4621.04	31.4
					27.6	3.43416	2.00126	0.794661	4632.1	31
					27.62	3.13657	2.14192	0.861842	4870.68	30.9
					27.64	3.15007	2.24068	0.874862	5143.59	30.8
					27.66	3.23089	2.25439	0.870636	5258.57	30.7
					27.68	3.13808	2.07982	0.959776	5283.62	30.6
					27.7	3.06684	2.14286	0.932841	5375.87	30.5
					27.72	3.05903	2.06901	0.972743	5545.51	30.4
					27.74	3.29675	2.19008	0.92494	5653.29	30.3
					27.76	3.07841	2.24937	0.847272	5622.14	30.2
					27.78	3.07769	2.15702	0.848082	5651.92	30.1
					27.8	3.13689	1.99304	0.832488	5699.81	30
					27.82	3.25989	2.0935	0.824214	5668.56	30.2
					27.84	3.19436	2.05729	0.835775	5560.55	30.4
					27.86	3.29981	1.943	0.840167	5350.97	30.6
					27.88	3.31944	2.11028	0.799013	4831.91	30.8
					27.9	3.28648	2.05234	0.810667	4838.96	31
					27.92	3.1311	2.07573	0.888152	4940.11	31.2
					27.94	3.11841	2.07219	0.821213	5116.25	31.4
					27.96	3.28329	2.1543	0.878321	5381.54	31.6
					27.98	3.17519	2.14132	0.906911	5656.09	31.8
					28	3.3221	2.15533	0.88584	5764.02	32
					28.02	3.16645	2.26573	0.90369	5713.15	31.8
					28.04	3.27451	2.14928	0.899804	5690.97	31.6
					28.06	3.35565	2.14695	0.864128	5792.8	31.4
					28.08	3.25903	2.13216	0.843333	5674.47	31.2
					28.1	3.20248	2.20258	0.909503	5673.9	31
					28.12	3.28092	2.16391	0.888897	5550.92	30.8
					28.14	3.16621	2.22495	0.804455	5478.82	30.6
					28.16	3.27999	2.21421	0.875045	5586.08	30.4
					28.18	3.31085	2.19155	0.880639	5610.83	30.2
					28.2	3.14531	2.16332	0.912852	5387.51	30
					28.22	3.26945	2.19536	0.900637	5195.05	30.4
					28.24	3.24298	2.22177	0.861109	5045.8	30.8
					28.26	3.28833	2.08152	0.981409	4940.46	31.2
					28.28	3.18254	2.08892	0.929334	5022.24	31.6
					28.3	3.2374	2.2137	0.92017	5109.16	32
					28.32	3.18123	2.13495	0.889037	5234.94	32.4
					28.34	3.23842	2.20346	0.968103	5382.6	32.8
					28.36	3.403	2.07302	0.882447	5530.12	33.2
					28.38	3.38473	2.2425	0.870196	5673.19	33.6
					28.4	3.41357	2.31963	0.88523	5772.83	34
					28.42	3.41995	2.16409	0.83528	5789.8	34.3
					28.44	3.40591	2.2661	0.863275	5738.25	34.6
					28.46	3.35261	2.11978	0.902401	5683.57	34.9
					28.48	3.37456	2.16183	0.84116	5850.35	35.2
					28.5	3.30419	2.24091	0.896724	5791.71	35.5
					28.52	3.42985	2.15869	0.876412	5726.48	35.8
					28.54	3.24707	2.18278	0.851444	5735.34	36.1
					28.56	3.34683	2.28157	0.860461	5803.19	36.4
					28.58	3.45684	2.17834	0.836185	5626.42	36.7
					28.6	3.14716	2.23383	0.951237	5578.77	37
					28.62	3.36516	2.20914	0.968507	5573.24	37
					28.64	3.21346	2.37638	0.905554	5448.82	37
					28.66	3.29049	2.41606	0.942422	5115.44	37
					28.68	3.28229	2.43054	0.970155	4809.04	37
					28.7	3.24062	2.32898	1.03437	4759.85	37
					28.72	3.24894	2.39714	0.973284	4866.04	37
					28.74	3.21956	2.29736	0.906504	5058.65	37
					28.76	3.37484	2.27881	1.06924	5256.57	37
					28.78	3.33495	2.37664	0.975869	5321.41	37
					28.8	3.361	2.36874	0.977128	5313.32	37
					28.82	3.3413	2.38133	0.990588	5358.5	37.2
					28.84	3.2801	2.36689	0.93464	5295.16	37.4
					28.86	3.271	2.0329	0.847122	5013.48	37.6
					28.88	3.38506	2.18223	0.839828	4812.49	37.8
					28.9	3.36489	2.17861	0.811694	4787.75	38
					28.92	3.27662	2.09313	0.928306	4825.35	38.2
					28.94	3.43273	2.21198	0.951057	4996.78	38.4
					28.96	3.46874	2.11033	0.799635	5301.17	38.6
					28.98	3.4546	2.07689	0.836618	5281.7	38.8
					29	3.49702	2.15905	0.82308	5290.96	39
					29.02	3.48483	2.01404	0.873663	5374.37	39
					29.04	3.57459	2.04997	0.790271	5445.16	39
					29.06	3.34476	2.10386	0.828104	5430.6	39
					29.08	3.42994	2.07671	0.88172	5433.13	39
					29.1	3.37295	2.06326	0.878599	5281.71	39
					29.12	3.56858	2.00919	0.831222	5145.61	39
					29.14	3.59194	2.00386	0.799021	4978.02	39
					29.16	3.4743	1.93714	0.803562	4751.22	39
					29.18	3.48075	2.0898	0.828014	4704.72	39
					29.2	3.55145	2.05492	0.858863	4790.23	39
					29.22	3.39629	1.99984	0.795539	4884.57	38.6
					29.24	3.49628	1.98516	0.842928	5021.08	38.2
					29.26	3.31857	1.99057	0.840957	5221	37.8
					29.28	3.57043	1.84697	0.863118	5325.88	37.4
					29.3	3.63382	1.89251	0.833489	5200.15	37
					29.32	3.45587	2.05379	0.94198	4915.37	36.6
					29.34	3.34667	2.04992	0.954037	4697.05	36.2
					29.36	3.67127	2.1202	0.909614	4712.9	35.8
					29.38	3.43258	2.0587	0.912837	4753.07	35.4
					29.4	3.45086	2.08761	0.93429	4638.12	35
					29.42	3.43953	2.19374	0.900372	4629.92	35.2
					29.44	3.48811	1.99624	0.879748	4732.38	35.4
					29.46	3.51971	2.17472	0.886646	4883.12	35.6
					29.48	3.47488	2.24697	0.954914	4982.8	35.8
					29.5	3.39013	2.20869	0.889866	5128.94	36
					29.52	3.40294	2.2506	0.954537	5288.81	36.2
					29.54	3.2795	2.16233	0.88867	5365.95	36.4
					29.56	3.43111	2.10119	0.896506	5292.29	36.6
					29.58	3.53645	2.21438	0.920251	5177.8	36.8
					29.6	3.38304	2.23967	0.954237	5057.35	37
					29.62	3.38361	2.18511	0.846068	4748.82	37.2
					29.64	3.48471	1.89029	0.791669	4497.55	37.4
					29.66	3.49798	1.96875	0.81418	4546.58	37.6
					29.68	3.47481	1.87	0.826602	4718.82	37.8
					29.7	3.5026	1.87655	0.73306	4866.99	38
					29.72	3.60517	1.82325	0.763821	4954.94	38.2
					29.74	3.3709	1.74786	0.732845	5049.08	38.4
					29.76	3.63106	1.78895	0.807211	5216.81	38.6
					29.78	3.39766	1.84196	0.796034	5431.81	38.8
					29.8	3.62534	1.84679	0.806958	5505.12	39
					29.82	3.609	1.96084	0.88791	5502.92	39
					29.84	3.53253	1.90966	0.932188	5376.22	39
					29.86	3.53898	1.86237	0.917285	5099.89	39
					29.88	3.57313	1.92219	0.869183	4864.94	39
					29.9	3.48272	2.00585	0.864163	4953.78	39
					29.92	3.50354	2.00515	0.897118	5207.26	39
					29.94	3.26255	1.92434	0.854296	5453.13	39
					29.96	3.42857	2.05142	0.839083	5551.82	39
					29.98	3.2449	2.03855	0.920792	5555.86	39
					30	3.42468	2.08996	0.958876	5363.44	39
					30.02	3.38745	2.17673	0.897792	5094.08	38.8
					30.04	3.38539	2.18374	0.929209	4919.95	38.6
					30.06	3.31349	2.21587	0.889255	4981.84	38.4
					30.08	3.40153	2.01311	0.866353	5221.41	38.2
					30.1	3.28356	2.14416	0.953606	5322.46	38
					30.12	3.34967	2.11624	0.89376	5175.25	37.8
					30.14	3.42034	2.20066	0.938004	4902.42	37.6
					30.16	3.35474	2.24339	0.914902	4697.21	37.4
					30.18	3.4136	2.11803	0.958832	4787.29	37.2
					30.2	3.19741	2.17568	0.968606	5126.26	37
					30.22	3.36685	2.08939	0.958743	5073.42	37.1
					30.24	3.44395	2.00963	0.841515	4746.57	37.2
					30.26	3.3538	2.02607	0.85931	4456.1	37.3
					30.28	3.34392	1.985	0.867829	4504.7	37.4
					30.3	3.47621	1.97494	0.837705	4497.96	37.5
					30.32	3.3073	1.90456	0.856906	4554.73	37.6
					30.34	3.35109	1.80347	0.843155	4680.34	37.7
					30.36	3.39896	1.81889	0.840108	4828.57	37.8
					30.38	3.31125	1.78633	0.863207	4833.92	37.9
					30.4	3.44069	1.78573	0.776668	4958.52	38
					30.42	3.62686	1.72898	0.804958	5155.68	38.3
					30.44	3.30164	1.78468	0.841886	5349.96	38.6
					30.46	3.32274	1.89269	0.796866	5472.62	38.9
					30.48	3.39826	2.11241	0.854561	5534.9	39.2
					30.5	3.37034	2.04757	0.899876	5487.09	39.5
					30.52	3.18378	2.08198	0.945063	5169.78	39.8
					30.54	3.38611	2.1149	0.977966	4783.46	40.1
					30.56	3.40323	2.24212	0.939093	4591.39	40.4
					30.58	3.14803	2.22075	0.948641	4691.61	40.7
					30.6	3.52537	2.13673	0.989445	4864.85	41
					30.62	3.26598	2.06305	0.938916	5115.92	41.1
					30.64	3.41242	1.92873	0.893563	5329.06	41.2
					30.66	3.29049	1.88741	0.888536	5399.68	41.3
					30.68	3.26955	1.8726	0.904991	5469.13	41.4
					30.7	3.42734	1.84749	0.866349	5533.46	41.5
					30.72	3.58804	1.99849	0.884134	5623.4	41.6
					30.74	3.44234	1.95835	0.857198	5605.78	41.7
					30.76	3.56565	1.93775	0.822541	5405.94	41.8
					30.78	3.4414	1.98042	0.903916	5522.15	41.9
					30.8	3.51683	1.96265	0.825967	5468.89	42
					30.82	3.24725	1.86327	0.82492	5241.75	41.6
					30.84	3.33774	1.96868	0.826398	4968.51	41.2
					30.86	3.26708	1.96589	0.821997	4823.63	40.8
					30.88	3.36058	1.87875	0.868506	5034.71	40.4
					30.9	3.42339	1.9145	0.766937	5190.79	40
					30.92	3.43733	1.94606	0.820296	5205.9	39.6
					30.94	3.23879	1.85555	0.816137	5037.56	39.2
					30.96	3.40775	1.98157	0.839796	4719.31	38.8
					30.98	3.36734	1.94849	0.852404	4629.34	38.4
					31	3.37185	1.9871	0.891	4661.93	38
					31.02	3.40692	2.22218	0.865248	4746.94	37.8
					31.04	3.1967	2.26902	1.03416	4831.49	37.6
					31.06	3.26627	2.2287	0.987063	4906.15	37.4
					31.08	3.24634	2.27588	1.05289	5223.56	37.2
					31.1	3.32583	2.24872	1.11264	5415.96	37
					31.12	3.26217	2.28071	0.95399	5645.54	36.8
					31.14	3.24828	2.18816	0.955908	5737.96	36.6
					31.16	3.28802	2.11148	0.935113	5521.42	36.4
					31.18	3.31778	2.00812	0.883871	5385.38	36.2
					31.2	3.59103	2.03941	0.900699	5467.59	36
					31.22	3.42205	2.17318	0.897821	5585.43	36.2
					31.24	3.38974	2.14656	0.887431	5658.96	36.4
					31.26	3.38054	2.18288	0.932829	5644.41	36.6
					31.28	3.27936	2.10989	0.943335	5551	36.8
					31.3	3.26701	2.07645	0.864347	5154.42	37
					31.32	3.19578	2.14034	0.8448	4948.05	37.2
					31.34	3.28256	2.09882	0.911158	4970.9	37.4
					31.36	3.44713	2.04855	0.859944	5064.26	37.6
					31.38	3.41009	2.16464	0.874688	4653.33	37.8
					31.4	3.38803	2.19462	0.936231	4592.93	38
					31.42	3.40098	2.05923	0.840867	4601.36	38.1
					31.44	3.47907	1.98732	0.888448	4695.87	38.2
					31.46	3.31956	1.9575	0.811925	4924.87	38.3
					31.48	3.37007	1.83167	0.809077	5003.03	38.4
					31.5	3.52143	1.80124	0.754415	5204.67	38.5
					31.52	3.34095	1.86213	0.777095	5372.53	38.6
					31.54	3.38409	1.72135	0.85489	5480.67	38.7
					31.56	3.48913	1.8018	0.776205	5499.12	38.8
					31.58	3.48054	1.76929	0.745783	5089.1	38.9
					31.6	3.45168	1.73571	0.743034	4802.43	39
					31.62	3.29158	1.79809	0.809237	4758.98	38.9
					31.64	3.21964	1.87363	0.881939	4919.08	38.8
					31.66	3.33451	1.92658	0.778117	5159.87	38.7
					31.68	3.25098	1.92723	0.85519	5192.19	38.6
					31.7	3.2248	1.96404	0.898604	5023.36	38.5
					31.72	3.17433	2.19201	0.92002	4916.07	38.4
					31.74	3.15858	2.0696	0.872542	4929	38.3
					31.76	3.1693	2.22101	0.990258	5057.91	38.2
					31.78	3.148	2.26447	0.948733	5312.2	38.1
					31.8	3.16167	2.25659	1.02801	5444.24	38
					31.82	3.14496	2.27985	0.989775	5474.65	37.8
					31.84	3.26541	2.36368	1.01208	5539.16	37.6
					31.86	3.16711	2.22307	1.0409	5744.14	37.4
					31.88	3.17474	2.34055	0.99592	5695.24	37.2
					31.9	3.13223	2.085	0.952519	5705.06	37
					31.92	3.42141	2.1602	0.966525	5475.69	36.8
					31.94	3.26756	2.05667	0.89196	5162.77	36.6
					31.96	3.40511	1.95406	0.86672	5025.26	36.4
					31.98	3.35535	2.08658	0.884176	4992.75	36.2
					32	3.33467	2.05918	0.893114	5040.82	36
					32.02	3.26406	2.20113	0.948407	5241.22	35.7
					32.04	3.27185	2.1182	0.93786	5425.08	35.4
					32.06	3.37576	2.12504	0.924013	5413.6	35.1
					32.08	3.38494	2.11384	0.941133	5534.19	34.8
					32.1	3.43413	2.05764	0.932381	5469.02	34.5
					32.12	3.42461	2.20403	0.931143	5272.41	34.2
					32.14	3.39507	2.27489	0.954293	4994.85	33.9
					32.16	3.30827	2.25149	0.975328	4737.94	33.6
					32.18	3.50818	2.13531	0.958101	4950.8	33.3
					32.2	3.28394	2.00421	0.948549	5131.95	33
					32.22	3.37524	1.96197	0.907964	5301.77	32.9
					32.24	3.4297	2.00137	0.913607	5448.36	32.8
					32.26	3.3341	1.9767	0.910046	5536.4	32.7
					32.28	3.51021	2.00258	0.926183	5415.59	32.6
					32.3	3.28942	1.98567	0.918971	5074.92	32.5
					32.32	3.36591	1.95561	0.905864	4777.59	32.4
					32.34	3.215	1.97548	0.835335	4629.35	32.3
					32.36	3.48868	1.98223	0.913407	4663.13	32.2
					32.38	3.41247	1.92207	0.895576	4773.42	32.1
					32.4	3.33512	2.04012	0.880941	4724.3	32
					32.42	3.34441	2.03656	0.851343	4786.75	32
					32.44	3.41936	2.15493	0.828671	4873.88	32
					32.46	3.41498	1.9415	0.819322	4852.36	32
					32.48	3.3412	2.09188	0.844578	5183.46	32
					32.5	3.33516	1.99811	0.947589	5482.75	32
					32.52	3.28386	2.06551	0.921918	5647.74	32
					32.54	3.17431	2.21384	0.971655	5669.78	32
					32.56	3.33247	2.23618	0.954491	5599.71	32
					32.58	3.24299	2.19039	0.990062	5648.28	32
					32.6	3.20611	2.26481	0.985587	5673.91	32
					32.62	3.2032	2.29927	1.01179	5667.79	32.1
					32.64	3.25927	2.19136	1.01421	5496.96	32.2
					32.66	3.22724	2.23646	0.987874	5058.05	32.3
					32.68	3.36552	2.16292	0.973936	4840.27	32.4
					32.7	3.46622	2.16871	0.959385	4921.31	32.5
					32.72	3.33913	2.1692	0.894567	5115.86	32.6
					32.74	3.29696	2.09806	0.903133	5369.13	32.7
					32.76	3.40325	2.27906	0.907439	5626.42	32.8
					32.78	3.54614	2.24149	0.862482	5497.53	32.9
					32.8	3.35683	2.18599	0.883862	5420.01	33
					32.82	3.40353	2.14195	0.874168	5277.66	33
					32.84	3.44163	2.02364	0.867689	5038.26	33
					32.86	3.49484	2.01986	0.872056	4742.37	33
					32.88	3.48657	1.94311	0.854384	4775.34	33
					32.9	3.49547	1.92826	0.904689	4847.66	33
					32.92	3.41644	2.01115	0.922451	4997.48	33
					32.94	3.48818	2.08359	0.908892	5171.3	33
					32.96	3.45813	2.10597	0.91631	5286.2	33
					32.98	3.51264	2.06905	0.891031	5341.94	33
					33	3.50541	2.06623	0.882861	5522.95	33
					33.02	3.40638	2.00757	0.885892	5300.35	33.1
					33.04	3.64684	1.99988	0.783648	4795.05	33.2
					33.06	3.46616	1.95506	0.760837	4396.12	33.3
					33.08	3.41127	1.99164	0.910956	4562.69	33.4
					33.1	3.4666	1.96523	0.899685	4998.12	33.5
					33.12	3.33541	1.94282	0.869053	5227.8	33.6
					33.14	3.40742	1.97847	0.89065	5093.72	33.7
					33.16	3.35112	1.93455	0.911851	4641.75	33.8
					33.18	3.42295	1.8614	0.809262	4618.06	33.9
					33.2	3.41559	1.97383	0.845652	4755.69	34
					33.22	3.24227	1.93029	0.833052	4894.5	33.9
					33.24	3.40374	1.9553	0.842637	5063.79	33.8
					33.26	3.24817	1.89793	0.892304	5337.8	33.7
					33.28	3.28625	1.97115	0.833987	5565.8	33.6
					33.3	3.3533	2.09647	0.869431	5643.47	33.5
					33.32	3.57471	2.18456	0.951617	5683.88	33.4
					33.34	3.36683	2.11266	0.973989	5660.52	33.3
					33.36	3.28659	2.01711	0.847588	5500.42	33.2
					33.38	3.46199	2.11818	0.854318	5186.01	33.1
					33.4	3.20205	2.0233	0.845186	4884.81	33
					33.42	3.49227	1.99732	0.853926	4850.11	33.2
					33.44	3.37285	1.88965	0.804852	5004.35	33.4
					33.46	3.28614	1.9512	0.809486	5155.67	33.6
					33.48	3.47006	1.99451	0.851526	5423.5	33.8
					33.5	3.37829	1.99789	0.787371	5414.65	34
					33.52	3.42042	2.14112	0.814348	5395.33	34.2
					33.54	3.31774	2.03681	0.819048	5426.3	34.4
					33.56	3.51	1.83441	0.909673	5479.16	34.6
					33.58	3.48245	2.03304	0.874537	5426.36	34.8
					33.6	3.43691	1.91485	0.842046	5049.33	35
					33.62	3.32867	1.93185	0.860812	4681.75	35.2
					33.64	3.45	1.89396	0.821926	4480.72	35.4
					33.66	3.46699	1.88105	0.898934	4511.74	35.6
					33.68	3.5086	1.97036	0.917803	4619.92	35.8
					33.7	3.34901	1.87693	0.865183	4719.3	36
					33.72	3.67844	1.87214	0.823057	4901.81	36.2
					33.74	3.39103	2.00423	0.846464	5147.21	36.4
					33.76	3.55771	2.0973	0.863481	5381.93	36.6
					33.78	3.40196	1.98254	0.888957	5510.71	36.8
					33.8	3.28243	2.02466	0.981224	5462.09	37
					33.82	3.37669	2.14567	0.954579	5362.62	37.1
					33.84	3.23616	2.23861	0.947684	5241.79	37.2
					33.86	3.29813	2.24073	0.968148	5076.74	37.3
					33.88	3.23233	2.18188	0.965842	4673.53	37.4
					33.9	3.36783	2.11772	0.983327	4516.87	37.5
					33.92	3.44592	2.04716	0.91413	4693.58	37.6
					33.94	3.38199	1.89281	0.878572	5047.08	37.7
					33.96	3.39186	1.92306	0.884964	5277.71	37.8
					33.98	3.31689	1.9706	0.910803	4831.95	37.9
					34	3.45511	1.94682	0.906699	4710.27	38
					34.02	3.29321	1.78241	0.864881	4745.22	38.1
					34.04	3.57508	1.9099	0.87185	4860.93	38.2
					34.06	3.34157	1.77386	0.78807	5022.11	38.3
					34.08	3.454	1.82233	0.897146	5339.7	38.4
					34.1	3.54573	1.87441	0.951265	5492.61	38.5
					34.12	3.20094	1.8883	0.886288	5316.85	38.6
					34.14	3.29402	1.98008	0.902779	4955.87	38.7
					34.16	3.29403	1.85157	0.896228	4711.54	38.8
					34.18	3.38535	1.88846	0.812057	4923.21	38.9
					34.2	3.31038	1.92442	0.904293	5225.06	39
					34.22	3.47324	1.89326	0.863725	5426.56	39.3
					34.24	3.38818	1.93152	0.963425	5329.5	39.6
					34.26	3.47096	2.12182	0.915351	4815.2	39.9
					34.28	3.30431	2.1137	0.893313	4728.6	40.2
					34.3	3.34738	1.99193	0.814017	4737.55	40.5
					34.32	3.30979	2.08976	0.933782	4867.77	40.8
					34.34	3.32122	2.0756	0.920314	5074.26	41.1
					34.36	3.29319	2.18816	0.929557	5270.29	41.4
					34.38	3.26787	2.29089	0.938558	5328.35	41.7
					34.4	3.28918	2.15568	0.892225	5386.25	42
					34.42	3.49898	1.99016	0.915586	5412.37	42.2
					34.44	3.38088	1.94924	0.837815	5425.45	42.4
					34.46	3.35345	1.87297	0.766773	5459.57	42.6
					34.48	3.21211	1.99513	0.841139	5434.72	42.8
					34.5	3.26892	2.05477	0.819056	5433.91	43
					34.52	3.2677	2.16435	0.930843	5460.31	43.2
					34.54	3.25842	2.17649	1.00159	5317.5	43.4
					34.56	3.16699	2.34325	0.974761	4787.1	43.6
					34.58	3.07208	2.39946	0.974539	4676.19	43.8
					34.6	3.07096	2.44043	0.963528	4649.56	44
					34.62	3.08977	2.51447	0.958213	4794.63	44.2
					34.64	3.10023	2.56599	1.02526	5086.31	44.4
					34.66	2.91789	2.68578	1.09676	5426.45	44.6
					34.68	2.94128	2.58135	1.09818	5575.43	44.8
					34.7	3.02733	2.50895	1.0551	5424.21	45
					34.72	3.01275	2.47399	1.08096	5212.1	45.2
					34.74	3.17752	2.4946	1.10048	5028.63	45.4
					34.76	2.99322	2.54409	1.07832	4915.19	45.6
					34.78	3.14816	2.39572	1.02647	5161.25	45.8
					34.8	3.16956	2.29554	1.02688	5282.14	46
					34.82	3.38163	2.25442	0.980499	5375.35	46.5
					34.84	3.40924	2.02883	0.868713	5279.36	47
					34.86	3.45203	1.94041	0.924859	4780.26	47.5
					34.88	3.5325	1.77434	0.825208	4609.17	48
					34.9	3.6218	1.65963	0.74239	4783.01	48.5
					34.92	3.51821	1.62095	0.754965	4845.66	49
					34.94	3.57071	1.53543	0.722672	4741.4	49.5
					34.96	3.6127	1.43134	0.608684	4642.56	50
					34.98	3.53299	1.51588	0.621598	5058.82	50.5
					35	3.67698	1.70101	0.747823	5236.32	51
					35.02	3.53836	1.93861	0.721652	5446.78	51
					35.04	3.46882	1.89172	0.743448	5496.61	51
					35.06	3.30341	1.96643	0.739847	5034.5	51
					35.08	3.11389	2.03972	0.833317	4915.51	51
					35.1	3.2354	2.17075	0.911597	4930.89	51
					35.12	3.23699	2.19647	0.957313	5132.05	51
					35.14	3.20161	2.27279	1.01573	5409.49	51
					35.16	3.02869	2.38874	0.946914	5570.34	51
					35.18	3.1023	2.39738	0.944395	5551.56	51
					35.2	3.10246	2.48022	0.943483	5388.56	51
					35.22	3.03998	2.56194	1.01891	5038.39	50.8
					35.24	3.11306	2.63931	1.03787	4732.61	50.6
					35.26	3.06465	2.39444	1.02911	4812.79	50.4
					35.28	3.12436	2.42424	1.03244	5006.75	50.2
					35.3	3.32216	2.43144	1.04416	5035.57	50
					35.32	3.25147	2.2527	0.999182	4876.15	49.8
					35.34	3.22297	2.21286	0.945923	4676.1	49.6
					35.36	3.32298	2.1177	0.892615	4666.07	49.4
					35.38	3.15438	2.03346	0.87238	4737.07	49.2
					35.4	3.27391	1.93727	0.831145	4810.43	49
					35.42	3.35424	1.94125	0.800822	4885.65	48.5
					35.44	3.3508	1.97384	0.770145	5023.47	48
					35.46	3.25652	1.90358	0.793542	5296.75	47.5
					35.48	3.17303	1.88555	0.754031	5415.61	47
					35.5	3.30307	1.89911	0.773028	5448.08	46.5
					35.52	3.33774	2.02345	0.846846	5333.31	46
					35.54	3.22443	2.07229	0.947004	5092.53	45.5
					35.56	3.21482	2.19755	0.864356	4814.71	45
					35.58	3.01647	2.38496	0.944509	4861.98	44.5
					35.6	3.09304	2.27656	0.903337	4827.73	44
					35.62	2.99123	2.39157	1.02021	4789.42	43.7
					35.64	3.1845	2.40286	1.08081	4792.36	43.4
					35.66	3.02367	2.43928	1.02367	4869.73	43.1
					35.68	3.10241	2.50077	1.0682	5145.44	42.8
					35.7	2.99143	2.5722	1.04712	5472.53	42.5
					35.72	3.03125	2.58643	1.06264	5636.69	42.2
					35.74	3.12663	2.65342	1.13435	5588.89	41.9
					35.76	2.90539	2.59493	1.10511	5372.22	41.6
					35.78	3.01081	2.65699	1.05066	4861.02	41.3
					35.8	3.00433	2.55862	1.08828	4785.11	41
					35.82	2.99442	2.63789	1.06534	4850.48	40.8
					35.84	3.04466	2.56737	1.08741	4923.87	40.6
					35.86	3.14318	2.63534	1.08492	4966.72	40.4
					35.88	3.17074	2.67019	1.11433	5183.53	40.2
					35.9	2.99596	2.55069	1.03076	5428.71	40
					35.92	3.00661	2.58195	1.08523	5578.63	39.8
					35.94	3.09786	2.61373	0.979676	5636.51	39.6
					35.96	3.07184	2.51545	1.05594	5679.2	39.4
					35.98	3.181	2.42251	0.974242	5723.54	39.2
					36	3.29679	2.35784	0.994556	5795.39	39
					36.02	3.20142	2.23951	0.992435	5776.9	38.8
					36.04	3.2907	2.181	0.963893	5749.44	38.6
					36.06	3.43343	2.13632	0.922882	5883.11	38.4
					36.08	3.53733	1.9214	0.799648	5732.99	38.2
					36.1	3.49439	1.70716	0.759982	5646.99	38
					36.12	3.46569	1.73769	0.851131	5563.14	37.8
					36.14	3.25497	2.01463	0.845273	5421.59	37.6
					36.16	3.19187	2.16726	0.887374	5166.7	37.4
					36.18	3.14207	2.25783	0.901651	4836.95	37.2
					36.2	3.312	2.18881	0.918218	4838	37
					36.22	3.09372	2.11127	0.979327	4795.07	36.9
					36.24	3.43133	2.07093	0.950787	4651.89	36.8
					36.26	3.45315	2.06894	0.833903	4544.84	36.7
					36.28	3.19549	2.13349	0.948786	4591.92	36.6
					36.3	3.30395	2.23556	0.881289	4640.15	36.5
					36.32	3.3516	2.12352	0.883137	4741.32	36.4
					36.34	3.25339	2.3477	0.925123	4843.92	36.3
					36.36	3.28316	2.31208	0.848361	4840.27	36.2
					36.38	3.24678	2.27635	0.902175	4836.47	36.1
					36.4	3.31194	2.42868	0.921989	4900.86	36
					36.42	3.09946	2.27695	0.867361	5030.88	36.2
					36.44	3.23496	2.20442	0.993837	5235.7	36.4
					36.46	3.14603	2.31971	0.927487	5516.84	36.6
					36.48	3.24851	2.29437	0.967967	5527.46	36.8
					36.5	3.36841	2.25957	0.972951	5441.92	37
					36.52	3.32037	2.2575	0.896232	5472.89	37.2
					36.54	3.19461	2.14663	0.932077	5593.63	37.4
					36.56	3.43955	2.08897	0.852906	5626.24	37.6
					36.58	3.5231	2.01798	0.881931	5607.56	37.8
					36.6	3.50763	2.0106	0.794678	5656.68	38
					36.62	3.65404	1.93684	0.770771	5647.36	38
					36.64	3.41605	1.92052	0.759616	5578.69	38
					36.66	3.60939	1.88432	0.872543	5523.42	38
					36.68	3.51387	2.18217	0.87793	5314.12	38
					36.7	3.55993	1.93536	0.851359	5034.73	38
					36.72	3.51089	2.28698	0.861087	4905.93	38
					36.74	3.40843	2.11371	0.806587	4915.04	38
					36.76	3.43931	2.09857	0.867938	4903.52	38
					36.78	3.39109	2.00312	0.914006	4990.94	38
					36.8	3.41325	1.96355	0.812267	4990.41	38
					36.82	3.63796	1.98204	0.860815	5049.41	38
					36.84	3.44809	2.05111	0.847884	5200.75	38
					36.86	3.49444	2.13117	0.848738	5400.59	38
					36.88	3.4461	2.20795	0.840701	5534.96	38
					36.9	3.21452	2.07684	0.85557	5549.21	38
					36.92	3.20455	2.15482	0.892684	5585.04	38
					36.94	3.28616	2.29738	0.972629	5687.96	38
					36.96	3.15541	2.40354	0.892416	5831.62	38
					36.98	3.12824	2.44443	1.00391	5800.78	38
					37	3.23863	2.44077	0.99559	5740.39	38
					37.02	3.24344	2.50708	0.963184	5645.25	38
					37.04	3.11901	2.51765	1.04541	5579.17	38
					37.06	3.17999	2.29522	1.03322	5646.42	38
					37.08	3.06683	2.45625	0.971334	5662.68	38
					37.1	3.11515	2.55615	0.998468	5710.86	38
					37.12	3.19878	2.42603	1.02796	5698.59	38
					37.14	3.30178	2.51981	1.04019	5651.91	38
					37.16	3.21076	2.51608	1.03651	5676.93	38
					37.18	3.22152	2.41036	0.960284	5758.64	38
					37.2	3.3034	2.16551	0.935679	5598	38
					37.22	3.49322	2.18883	0.875159	5518.09	37.7
					37.24	3.54088	1.8319	0.843612	5452.51	37.4
					37.26	3.60717	1.88474	0.763235	5075.53	37.1
					37.28	3.695	1.65172	0.795093	4673.16	36.8
					37.3	3.64339	1.71993	0.76719	4675.91	36.5
					37.32	3.53585	1.73872	0.762513	4761.41	36.2
					37.34	3.58042	1.84206	0.75036	4827.44	35.9
					37.36	3.44486	1.9703	0.850393	4928.56	35.6
					37.38	3.3783	2.01287	0.799569	5157.22	35.3
					37.4	3.45704	2.08071	0.842782	5344.07	35
					37.42	3.28079	2.16781	0.863921	5422.16	35
					37.44	3.30718	2.15001	0.877301	5401.52	35
					37.46	3.21499	2.23003	0.928381	5353.22	35
					37.48	3.26858	2.25243	0.889168	5390.16	35
					37.5	3.20112	2.31372	0.998651	5071.87	35
					37.52	3.1164	2.34426	0.98077	4844.06	35
					37.54	3.13591	2.38521	1.04265	4784.82	35
					37.56	3.25898	2.32607	1.00973	4709.25	35
					37.58	3.22333	2.31108	1.06766	4676.16	35
					37.6	3.44277	2.41338	1.0265	4769.52	35
					37.62	3.37172	2.43354	0.986547	4940.47	35.3
					37.64	3.45733	2.14382	1.04905	5125.59	35.6
					37.66	3.40551	2.02239	0.923347	5246.37	35.9
					37.68	3.35492	2.02134	0.953497	5236.37	36.2
					37.7	3.42716	2.03509	0.88532	5295.71	36.5
					37.72	3.43217	2.099	0.866957	5369.42	36.8
					37.74	3.49586	1.98507	0.894041	5440.06	37.1
					37.76	3.2973	1.98492	0.912376	5515.68	37.4
					37.78	3.36282	1.99184	0.874722	5467.77	37.7
					37.8	3.37221	1.94689	0.941185	5417.9	38
					37.82	3.58853	2.07925	0.901198	5325.39	38.2
					37.84	3.47924	1.93254	0.879986	5107.4	38.4
					37.86	3.46019	1.88304	0.881341	4661.22	38.6
					37.88	3.23948	2.02907	0.843782	4513.31	38.8
					37.9	3.3024	2.0202	0.901234	4467.81	39
					37.92	3.47505	2.12838	0.896658	4466.61	39.2
					37.94	3.24304	2.06217	0.835541	4475.71	39.4
					37.96	3.41411	2.08752	0.809721	4480.62	39.6
					37.98	3.3725	1.85634	0.808761	4593.13	39.8
					38	3.47004	1.86189	0.830201	4768.29	40
					38.02	3.62948	1.93283	0.905838	4979.66	39.7
					38.04	3.49786	2.0256	0.890469	5186.88	39.4
					38.06	3.44305	1.95958	0.879771	5334.15	39.1
					38.08	3.68651	1.8429	0.835577	5306.8	38.8
					38.1	3.5038	1.90377	0.754123	5280.76	38.5
					38.12	3.53841	1.8658	0.801271	5106.58	38.2
					38.14	3.4781	1.85592	0.7913	4866.93	37.9
					38.16	3.53909	1.90203	0.830425	4835.65	37.6
					38.18	3.5421	1.98222	0.844865	4930.12	37.3
					38.2	3.41668	1.97802	0.921924	4819.32	37
					38.22	3.38369	1.98391	0.859632	4726.41	36.9
					38.24	3.56783	2.07935	0.882883	4741.92	36.8
					38.26	3.50567	2.11607	0.96244	4842.64	36.7
					38.28	3.35605	2.2631	0.948418	4678.43	36.6
					38.3	3.24244	2.19082	0.795464	4750.34	36.5
					38.32	3.24254	2.22465	0.893059	4982.57	36.4
					38.34	3.17427	2.28073	0.941978	5249.43	36.3
					38.36	3.25338	2.26295	0.925115	5383.88	36.2
					38.38	3.39171	2.22597	0.872594	5572.12	36.1
					38.4	3.196	2.34826	0.875543	5614.25	36
					38.42	3.25234	2.31085	0.910846	5569.76	35.8
					38.44	3.10787	2.43083	0.994854	5518.65	35.6
					38.46	3.2389	2.46782	0.909591	5562.53	35.4
					38.48	3.22933	2.4131	0.913716	5569.13	35.2
					38.5	3.38645	2.26977	0.942309	5433.22	35
					38.52	3.24325	2.17099	0.893511	5115.83	34.8
					38.54	3.33135	2.23505	0.881194	4751.26	34.6
					38.56	3.2524	2.18782	0.887705	4628.8	34.4
					38.58	3.19154	2.0688	0.809074	4816.28	34.2
					38.6	3.17989	2.05626	0.845654	4735.24	34
					38.62	3.35928	2.0259	0.850824	4649.77	33.9
					38.64	3.30713	2.17125	0.854741	4696.42	33.8
					38.66	3.31332	2.06847	0.895238	4898.13	33.7
					38.68	3.28609	2.10737	0.891903	4978.99	33.6
					38.7	3.2606	2.15848	0.793043	5218.09	33.5
					38.72	3.21811	2.0662	0.864835	5323.23	33.4
					38.74	3.24771	2.05957	0.861477	5151	33.3
					38.76	3.25011	2.05817	0.886899	4696.6	33.2
					38.78	3.24468	2.07251	0.849635	4665.67	33.1
					38.8	3.23382	1.92878	0.793049	4762.47	33
					38.82	3.24564	1.97279	0.835926	4869.59	32.9
					38.84	3.25835	2.08658	0.775517	4976.72	32.8
					38.86	3.25969	1.98698	0.866772	5173.34	32.7
					38.88	3.36969	2.13406	0.824481	5426.84	32.6
					38.9	3.13876	2.20953	0.943841	5554.25	32.5
					38.92	3.18038	2.27222	0.916353	5561.35	32.4
					38.94	3.16571	2.39071	0.914368	5533.79	32.3
					38.96	3.33932	2.31335	0.938119	5631.51	32.2
					38.98	3.26893	2.28518	0.894161	5582.02	32.1
					39	3.16773	2.25645	0.916479	5242.45	32
					39.02	3.36267	2.25052	0.908382	4847.4	32
					39.04	3.2234	2.26376	0.959019	4600.61	32
					39.06	3.14853	2.15362	0.874822	4676.3	32
					39.08	3.32912	2.12607	0.894221	4744.58	32
					39.1	3.35897	2.07797	0.946538	4825.45	32
					39.12	3.54157	2.10509	0.867289	4935.59	32
					39.14	3.30226	2.02985	0.888465	5058.84	32
					39.16	3.33824	2.11038	0.830741	5148.65	32
					39.18	3.34052	1.86545	0.751037	5310.77	32
					39.2	3.36771	1.87201	0.820828	5421.82	32
					39.22	3.33732	2.0225	0.75715	5266.13	32.2
					39.24	3.36801	1.95345	0.803421	4910.4	32.4
					39.26	3.24479	1.95301	0.865995	4703.76	32.6
					39.28	3.31228	2.04979	0.855187	4650.12	32.8
					39.3	3.16556	2.07941	0.857945	4844.84	33
					39.32	3.39496	2.12313	0.895375	5121.98	33.2
					39.34	3.37935	2.03729	0.880416	5297.61	33.4
					39.36	3.48222	1.99607	0.828155	5169.81	33.6
					39.38	3.39953	1.99219	0.850359	4847.8	33.8
					39.4	3.21508	1.83548	0.772251	4826.67	34
					39.42	3.27333	2.00045	0.858001	4966.02	33.8
					39.44	3.45891	1.95947	0.787886	5127.05	33.6
					39.46	3.40095	1.90512	0.757759	5172.57	33.4
					39.48	3.5213	1.87823	0.732097	4948.2	33.2
					39.5	3.42721	2.02501	0.786823	4751.69	33
					39.52	3.34579	1.93176	0.776697	4724.93	32.8
					39.54	3.33228	2.07463	0.729105	4745.95	32.6
					39.56	3.34639	2.02967	0.809256	4428.89	32.4
					39.58	3.357	1.98735	0.820987	4507.26	32.2
					39.6	3.39145	2.01617	0.844219	4677.09	32
					39.62	3.34702	2.09948	0.851088	4853.17	31.3
					39.64	3.26225	2.11413	0.803145	4928.1	30.6
					39.66	3.43853	2.16417	0.801124	4770.2	29.9
					39.68	3.3394	2.18333	0.876525	4816.57	29.2
					39.7	3.36819	2.16008	0.896549	4835.75	28.5
					39.72	3.28453	2.05345	0.898036	4801.31	27.8
					39.74	3.39162	2.13049	0.867425	4808.63	27.1
					39.76	3.27502	2.0897	0.904636	5082.85	26.4
					39.78	3.35677	2.01683	0.896264	5351.47	25.7
					39.8	3.43361	1.96876	0.821405	5462.68	25
					39.82	3.53433	1.97311	0.810031	5444.39	25
					39.84	3.56569	2.0771	0.898003	5286.3	25
					39.86	3.43523	1.97861	0.874942	4935.26	25
					39.88	3.45302	2.07677	0.871593	4916.12	25
					39.9	3.39017	1.97017	0.864727	5049.06	25
					39.92	3.37621	2.07363	0.808126	5194.02	25
					39.94	3.35174	1.87887	0.824114	5290.68	25
					39.96	3.38714	1.8872	0.801896	5362.52	25
[truncated: 10,163 more rows]

## Sheet: Fig.5 & S6 Berg. EM abundances 
Depth (cm)	R^2	Theta	EM 1_AVG	EM 1_Meas1	EM 1_Meas2	EM 1_Meas3	EM1_StDev	EM1-St_Dev	EM1+St_Dev	LogEM1	Log_EM1_Meas1	Log_EM1_Meas2	Log_EM1_Meas3	Log_EM1_StDev	LogEM1-StDev	LogEM1+StDev	EM2_AVG	EM 2_Meas1	EM 2_Meas2	EM 2_Meas3	St_Dev	EM-St_Dev	EM+St_Dev	LogEM2	LogEM2_Meas1	LogEM2_Meas2	LogEM2_Meas3	Log_EM2_StDev	LogEM2-StDev	LogEM2+StDev	EM3_AVG	EM 3_Meas1	EM 3_Meas2	EM 3_Meas3	St_dev	EM3-St_Dev	EM3+St_Dev	LogEM3	Log_EM3_Meas1	Log_EM3_Meas2	Log_EM3_Meas3	Log_StDev	LogEM3-StDev	LogEM3+StDev
1	0.99689	2.78698	76.6399	80.5597	78.2345	73.6471	2.87201	73.7678	79.5119	0.515979	0.617415	0.55563	0.446326	0.0707391	0.586718	0.44524	23.3601	19.4403	21.7655	26.3529	2.87201	20.4881	26.2322	-0.515979	1.2887	1.33777	1.42083	0.0545323	-0.570512	-0.461447	0	0	0	0	0	0	0	#NUM!	#NUM!	#NUM!	#NUM!	#NUM!	#NUM!	#NUM!
3	0.99798	2.23708	76.3509	80.3388	77.7442	73.4685	2.83265	73.5183	79.1836	0.509	0.611316	0.543224	0.442339	0.0694161	0.578416	0.439584	22.8675	18.5648	20.2099	26.1205	3.24432	19.6231	26.1118	-0.52802	1.26869	1.30557	1.41698	0.0630377	-0.591057	-0.464982	0.78161	1.09636	2.04586	0.41098	0.670334	0.111276	1.45194	-2.1036	-1.95526	-1.68015	-2.38439	0.289789	-2.39339	-1.81381
5	0.99856	1.89723	79.7422	83.1908	81.0584	77.0126	2.56224	77.18	82.3044	0.595096	0.69453	0.631382	0.525073	0.0699245	0.66502	0.525171	18.497	13.7983	15.8789	22.223	3.58315	14.9138	22.0801	-0.644073	1.13983	1.20082	1.3468	0.0868397	-0.730913	-0.557234	1.76084	3.01084	3.06268	0.76439	1.07141	0.689425	2.83225	-1.74656	-1.50804	-1.50039	-2.11335	0.287168	-2.03373	-1.4594
7	0.99836	2.02587	76.0904	79.9772	77.7238	72.9567	2.92668	73.1637	79.0171	0.502758	0.60144	0.542713	0.431006	0.0706911	0.573449	0.432067	23.9096	20.0228	22.2762	27.0433	2.92668	20.9829	26.8363	-0.502758	1.30153	1.34784	1.43206	0.0540337	-0.556792	-0.448724	0	0	0	0	0	0	0	#NUM!	#NUM!	#NUM!	#NUM!	#NUM!	#NUM!	#NUM!
8.5	0.98696	5.90382	51.6945	58.3025	54.1486	45.9804	5.11868	46.5759	56.8132	0.0294485	0.145577	0.0722353	-0.0699786	0.0894849	0.118933	-0.0600364	48.3055	41.6975	45.8514	54.0196	5.11868	43.1868	53.4241	-0.0294485	1.62011	1.66135	1.73255	0.0464438	-0.0758922	0.0169953	0	0	0	0	0	0	0	#NUM!	#NUM!	#NUM!	#NUM!	#NUM!	#NUM!	#NUM!
9	0.98891	5.39503	59.4371	65.4215	61.6344	54.492	4.53149	54.9056	63.9686	0.165928	0.276914	0.205882	0.078245	0.0821964	0.248124	0.0837315	40.5629	34.5785	38.3656	45.508	4.53149	36.0314	45.0944	-0.165928	1.53881	1.58394	1.65809	0.0491742	-0.215102	-0.116754	0	0	0	0	0	0	0	#NUM!	#NUM!	#NUM!	#NUM!	#NUM!	#NUM!	#NUM!
9.5	0.99305	4.17087	52.6943	57.2164	54.7448	49.2423	3.3329	49.3614	56.0272	0.0468503	0.126244	0.0826742	-0.0131641	0.0582312	0.105082	-0.0113808	47.3057	42.7836	45.2552	50.7577	3.3329	43.9728	50.6386	-0.0468503	1.63128	1.65567	1.7055	0.03089	-0.0777403	-0.0159604	0	0	0	0	0	0	0	#NUM!	#NUM!	#NUM!	#NUM!	#NUM!	#NUM!	#NUM!
10.5	0.99268	4.29633	84.9614	87.3721	86.0923	83.0242	1.8244	83.137	86.7858	0.752014	0.840043	0.791709	0.689374	0.0628135	0.814827	0.6892	10.7717	6.18718	9.08826	13.6604	3.07627	7.69539	13.8479	-0.91822	0.791493	0.958481	1.13546	0.140446	-1.05867	-0.777774	4.26696	6.44068	4.81944	3.31537	1.2762	2.99076	5.54316	-1.35094	-1.16216	-1.29555	-1.46483	0.123854	-1.4748	-1.22709
11	0.99842	1.96838	67.8852	72.1105	69.5458	64.6701	3.08597	64.7992	70.9711	0.325069	0.412558	0.358623	0.262562	0.0620354	0.387105	0.263034	31.0609	26.6733	28.7337	34.1077	3.13397	27.927	34.1949	-0.346251	1.42608	1.45839	1.53285	0.0447086	-0.39096	-0.301542	1.05391	1.21615	1.72055	1.22213	0.23638	0.81753	1.29029	-1.9726	-1.9097	-1.7568	-1.90754	0.0715765	-2.04417	-1.90102
12	0.997	2.76334	77.2525	81.27	78.8671	73.8912	3.07284	74.1797	80.3253	0.530979	0.637393	0.571936	0.451806	0.076854	0.607833	0.454125	22.7475	18.73	21.1329	26.1088	3.07284	19.6747	25.8203	-0.530979	1.27254	1.32496	1.41679	0.0596177	-0.590597	-0.471361	0	0	0	0	0	0	0	#NUM!	#NUM!	#NUM!	#NUM!	#NUM!	#NUM!	#NUM!
12.5	0.99664	2.86187	68.4171	72.5834	69.7548	65.5458	2.89143	65.5257	71.3085	0.335713	0.422823	0.362918	0.279303	0.0588577	0.394571	0.276855	28.8581	24.502	26.745	31.5839	2.9552	25.9029	31.8133	-0.391857	1.3892	1.42724	1.49947	0.0457303	-0.437587	-0.346127	2.72476	2.91462	3.50021	2.87031	0.287064	2.4377	3.01182	-1.55267	-1.52257	-1.44043	-1.52942	0.0404327	-1.59311	-1.51224
13	0.94455	10.7066	36.3961	34.7854	35.425	39.5068	2.09126	34.3048	38.4873	-0.24243	-0.272947	-0.260754	-0.185035	0.0388879	-0.203542	-0.281318	14.3069	15.5922	13.1634	8.48306	2.95043	11.3564	17.2573	-0.777401	1.19291	1.11937	0.928553	0.111406	-0.888808	-0.665995	49.2971	49.6223	51.4116	52.0102	1.01443	48.2826	50.3115	-0.0122119	-0.00656092	0.0245282	0.0349394	0.0176295	-0.0298415	0.00541758
13.5	0.9988	1.74146	80.8175	84.5767	82.6144	78.7913	2.40225	78.4153	83.2198	0.6246	0.739074	0.676865	0.569965	0.0698376	0.694438	0.554763	18.5278	13.7835	16.1504	21.1052	3.05063	15.4771	21.5784	-0.643186	1.13936	1.20818	1.32439	0.0763583	-0.719544	-0.566828	0.65471	1.63972	1.23517	0.10351	0.65015	0.00455991	1.30486	-2.1811	-1.77805	-1.90288	-2.98457	0.541738	-2.72284	-1.63936
14	0.97932	7.22091	59.4706	64.8748	61.8282	55.2133	4.03296	55.4376	63.5035	0.166532	0.266458	0.209443	0.0908953	0.0731259	0.239658	0.0934057	40.5294	35.1251	38.1718	44.7867	4.03296	36.4965	44.5624	-0.166532	1.54562	1.58174	1.65115	0.043791	-0.210323	-0.122741	0	0	0	0	0	0	0	#NUM!	#NUM!	#NUM!	#NUM!	#NUM!	#NUM!	#NUM!
14.5	0.98359	6.41278	56.7543	61.9828	58.7292	51.919	4.19318	52.5611	60.9475	0.118056	0.212291	0.153211	0.0333527	0.0744427	0.192499	0.0436133	43.2457	38.0172	41.2708	48.081	4.19318	39.0525	47.4389	-0.118056	1.57998	1.61564	1.68197	0.0422614	-0.160317	-0.0757946	0	0	0	0	0	0	0	#NUM!	#NUM!	#NUM!	#NUM!	#NUM!	#NUM!	#NUM!
15	0.9939	4.14712	73.6968	78.3427	75.399	70.0085	3.45093	70.2458	77.1477	0.447439	0.558393	0.486414	0.368153	0.0784275	0.525867	0.369012	26.3032	21.6573	24.601	29.9915	3.45093	22.8523	29.7542	-0.447439	1.33561	1.39095	1.477	0.058175	-0.505614	-0.389264	0	0	0	0	0	0	0	#NUM!	#NUM!	#NUM!	#NUM!	#NUM!	#NUM!	#NUM!
15.5	0.97578	7.88724	61.0366	67.0949	64.1067	56.8205	4.31509	56.7215	65.3517	0.194933	0.309426	0.251889	0.119227	0.0796416	0.274574	0.115291	38.9634	32.9051	35.8933	43.1795	4.31509	34.6483	43.2785	-0.194933	1.51726	1.55501	1.63528	0.04921	-0.244143	-0.145723	0	0	0	0	0	0	0	#NUM!	#NUM!	#NUM!	#NUM!	#NUM!	#NUM!	#NUM!
16	0.98281	6.64899	61.0793	66.4255	64.1307	57.3361	3.85933	57.22	64.9386	0.195713	0.296325	0.252344	0.128368	0.0711134	0.266827	0.1246	38.9207	33.5745	35.8693	42.6639	3.85933	35.0614	42.78	-0.195713	1.52601	1.55472	1.63006	0.0438771	-0.23959	-0.151836	0	0	0	0	0	0	0	#NUM!	#NUM!	#NUM!	#NUM!	#NUM!	#NUM!	#NUM!
17	0.9939	3.83606	71.0351	73.8978	72.2781	69.0487	2.01567	69.0194	73.0508	0.389601	0.451955	0.416184	0.348477	0.0429101	0.432511	0.346691	21.5275	17.3576	19.6107	23.709	2.62916	18.8984	24.1567	-0.561723	1.23949	1.29249	1.37491	0.0557195	-0.617443	-0.506004	7.43736	8.7446	8.11115	7.24232	0.615807	6.82155	8.05317	-1.09502	-1.01852	-1.05418	-1.10747	0.0365521	-1.13157	-1.05846
18	0.99343	4.01959	69.3239	73.5859	71.2926	65.8043	3.26489	66.059	72.5887	0.354082	0.444959	0.395051	0.284282	0.0671463	0.421228	0.286936	30.6761	26.4141	28.7074	34.1957	3.26489	27.4113	33.941	-0.354082	1.42184	1.45799	1.53397	0.0467317	-0.400814	-0.30735	0	0	0	0	0	0	0	#NUM!	#NUM!	#NUM!	#NUM!	#NUM!	#NUM!	#NUM!
19	0.99487	3.59942	83.3016	86.0615	84.1695	81.6011	1.82791	81.4737	85.1295	0.697978	0.790594	0.725659	0.646905	0.0587511	0.756729	0.639226	12.3507	7.92495	10.4044	15.1214	2.98491	9.36575	15.3356	-0.851058	0.898997	1.01722	1.17959	0.115025	-0.966083	-0.736034	4.34777	6.01352	5.42611	3.27746	1.17605	3.17172	5.52382	-1.34243	-1.19394	-1.24128	-1.46999	0.120533	-1.46296	-1.2219
20	0.99572	3.24832	64.7119	69.1449	66.5946	61.1566	3.33148	61.3804	68.0434	0.263355	0.350433	0.299623	0.197126	0.063762	0.327117	0.199594	35.2881	30.8551	33.4054	38.8434	3.33148	31.9566	38.6196	-0.263355	1.48933	1.52382	1.58932	0.0414701	-0.304826	-0.221885	0	0	0	0	0	0	0	#NUM!	#NUM!	#NUM!	#NUM!	#NUM!	#NUM!	#NUM!
21	0.99619	3.0984	82.9842	85.6677	83.2024	81.4174	1.74258	81.2416	84.7268	0.688144	0.776502	0.69489	0.64161	0.0554727	0.743616	0.632671	8.23383	3.80279	5.84303	11.4032	3.21186	5.02197	11.4457	-1.04708	0.580102	0.766638	1.05703	0.196236	-1.24332	-0.850844	8.78195	10.5295	10.9545	7.17943	1.68836	7.09359	10.4703	-1.01649	-0.929272	-0.910019	-1.11155	0.0908076	-1.1073	-0.925682
22	0.99849	1.953	77.3092	80.3616	78.9928	75.0536	2.25007	75.0592	79.5593	0.532382	0.611942	0.575219	0.478364	0.0563448	0.588727	0.476037	22.6908	19.4047	20.9932	24.9464	2.33004	20.3607	25.0208	-0.532382	1.28791	1.32208	1.39701	0.0455646	-0.577947	-0.486818	0	0.23375	0.01395	0	0.107054	-0.107054	0.107054	#NUM!	-2.63023	-3.85537	#NUM!	#NUM!	#NUM!	#NUM!
23	0.99432	3.79542	92.9372	93.1503	92.9185	91.9998	0.496823	92.4404	93.434	1.11921	1.13351	1.11798	1.06068	0.0313186	1.15053	1.08789	0.90309	0	0	3.64101	1.71639	-0.813299	2.61948	-2.04033	#NUM!	#NUM!	0.561222	#NUM!	#NUM!	#NUM!	6.1597	6.84972	7.0815	4.35923	1.2323	4.9274	7.392	-1.18283	-1.13351	-1.11798	-1.34123	0.10178	-1.28461	-1.08105
24	0.9976	2.45508	79.5355	82.6232	81.2157	79.2845	1.36859	78.1669	80.9041	0.58956	0.677132	0.635846	0.582893	0.038571	0.628131	0.550989	12.5783	8.21249	10.801	15.1293	2.85338	9.72487	15.4316	-0.841999	0.914475	1.03346	1.17982	0.108518	-0.950517	-0.733482	7.88623	9.16431	7.98326	5.58621	1.48861	6.39762	9.37484	-1.06746	-0.996157	-1.06169	-1.22792	0.097548	-1.165	-0.969907
25	0.98792	5.50481	69.0721	73.8037	70.7761	65.496	3.43289	65.6392	72.505	0.348953	0.449838	0.384148	0.278346	0.0706468	0.4196	0.278306	30.9279	26.1963	29.2239	34.504	3.43289	27.495	34.3608	-0.348953	1.41824	1.46574	1.53787	0.0491822	-0.398135	-0.299771	0	0	0	0	0	0	0	#NUM!	#NUM!	#NUM!	#NUM!	#NUM!	#NUM!	#NUM!
26	0.99934	1.27278	73.8123	76.1659	75.5721	72.0349	1.8236	71.9887	75.6359	0.450031	0.504561	0.490476	0.410926	0.041223	0.491254	0.408808	22.9095	19.1652	20.7539	25.2964	2.59808	20.3114	25.5076	-0.526985	1.28251	1.3171	1.40306	0.0506802	-0.577665	-0.476305	3.27819	4.6689	3.67399	2.6687	0.816582	2.46161	4.09477	-1.46989	-1.31002	-1.41861	-1.56195	0.103177	-1.57307	-1.36671
27	0.99759	2.44336	75.3872	77.0324	77.1383	73.803	1.54794	73.8392	76.9351	0.486136	0.525559	0.528163	0.449822	0.0363318	0.522468	0.449804	18.9109	14.7498	17.0432	21.5649	2.8314	16.0795	21.7423	-0.63225	1.16879	1.23155	1.33375	0.0679836	-0.700233	-0.564266	5.7019	8.21775	5.81846	4.63208	1.4915	4.2104	7.1934	-1.21848	-1.04801	-1.20916	-1.31363	0.109259	-1.32774	-1.10922
27.5	0.99654	2.93801	70.1164	74.6397	71.4536	67.0328	3.11913	66.9972	73.2355	0.370386	0.468816	0.398472	0.308205	0.0657373	0.436123	0.304649	29.8836	25.3603	28.5464	32.9672	3.11913	26.7645	33.0028	-0.370386	1.40415	1.45555	1.51808	0.0465851	-0.416971	-0.323801	0	0	0	0	0	0	0	#NUM!	#NUM!	#NUM!	#NUM!	#NUM!	#NUM!	#NUM!
28	0.99871	1.7923	71.441	73.9574	73.6334	69.2973	2.12455	69.3164	73.5655	0.398204	0.453297	0.446022	0.35354	0.0454085	0.443613	0.352796	28.559	25.7637	26.3666	30.7027	2.19998	26.359	30.759	-0.398204	1.41101	1.42105	1.48718	0.0337882	-0.431992	-0.364416	0	0.27892	0	0	0.131484	-0.131484	0.131484	#NUM!	-2.55331	#NUM!	#NUM!	#NUM!	#NUM!	#NUM!
29	0.99796	2.30043	75.8666	77.8433	77.9874	74.1376	1.78183	74.0848	77.6484	0.497432	0.545716	0.549352	0.457369	0.0425304	0.539963	0.454902	24.1334	22.1567	22.0126	25.8624	1.78183	22.3516	25.9152	-0.497432	1.34551	1.34267	1.41267	0.0323501	-0.529782	-0.465082	0	0	0	0	0	0	0	#NUM!	#NUM!	#NUM!	#NUM!	#NUM!	#NUM!	#NUM!
30	0.99482	3.68333	74.0783	77.5014	75.8039	71.4329	2.55634	71.522	76.6347	0.456028	0.537154	0.495946	0.398032	0.0583478	0.514376	0.397681	25.9217	22.4986	24.1961	28.5671	2.55634	23.3653	28.478	-0.456028	1.35216	1.38375	1.45587	0.0434041	-0.499433	-0.412624	0	0	0	0	0	0	0	#NUM!	#NUM!	#NUM!	#NUM!	#NUM!	#NUM!	#NUM!
30.5	0.98609	6.13323	69.1281	74.7349	71.2632	64.3497	4.31666	64.8115	73.4448	0.350092	0.471003	0.394428	0.256484	0.0887637	0.438856	0.261328	30.8719	25.2651	28.7368	35.6503	4.31666	26.5552	35.1885	-0.350092	1.40252	1.45844	1.55206	0.061694	-0.411786	-0.288398	0	0	0	0	0	0	0	#NUM!	#NUM!	#NUM!	#NUM!	#NUM!	#NUM!	#NUM!
31	0.99776	2.42007	82.9974	86.5582	84.5518	80.0753	2.70989	80.2875	85.7073	0.688549	0.80885	0.738244	0.604108	0.0849164	0.773465	0.603632	17.0026	13.4418	15.4482	19.9247	2.70989	14.2927	19.7125	-0.688549	1.12846	1.18888	1.29939	0.0707748	-0.759323	-0.617774	0	0	0	0	0	0	0	#NUM!	#NUM!	#NUM!	#NUM!	#NUM!	#NUM!	#NUM!
32	0.99586	3.36574	78.199	82.0846	79.8793	75.0778	2.92524	75.2738	81.1243	0.554726	0.661036	0.598792	0.478926	0.0755768	0.630303	0.479149	21.801	17.9154	20.1207	24.9222	2.92524	18.8757	24.7262	-0.554726	1.25323	1.30364	1.39659	0.0593788	-0.614105	-0.495347	0	0	0	0	0	0	0	#NUM!	#NUM!	#NUM!	#NUM!	#NUM!	#NUM!	#NUM!
33	0.99845	2.02605	79.7283	82.404	81.7916	77.2813	2.28424	77.4441	82.0125	0.594723	0.670535	0.652437	0.531691	0.0616301	0.656353	0.533092	20.2717	17.596	18.2084	22.7187	2.28424	17.9875	22.5559	-0.594723	1.24541	1.26027	1.35638	0.0491849	-0.643907	-0.545538	0	0	0	0	0	0	0	#NUM!	#NUM!	#NUM!	#NUM!	#NUM!	#NUM!	#NUM!
34	0.99881	1.7225	79.8848	82.3823	81.4904	78.0819	1.85313	78.0317	81.738	0.598941	0.669885	0.643709	0.551747	0.0506607	0.649601	0.54828	20.1152	16.6038	18.5096	21.9181	2.19828	17.9169	22.3135	-0.598941	1.22021	1.2674	1.3408	0.0496193	-0.64856	-0.549321	0	1.01393	0	0	0.477971	-0.477971	0.477971	#NUM!	-1.98957	#NUM!	#NUM!	#NUM!	#NUM!	#NUM!
34.5	0.99695	2.84329	76.9018	81.3052	78.6644	73.0861	3.42614	73.4756	80.3279	0.522357	0.638399	0.566673	0.433858	0.0847358	0.607093	0.437621	23.0983	18.6948	21.3356	26.9139	3.42614	19.6721	26.5244	-0.522357	1.27172	1.32911	1.42998	0.0654162	-0.587773	-0.456941	0	0	0	0	0	0	0	#NUM!	#NUM!	#NUM!	#NUM!	#NUM!	#NUM!	#NUM!
35	0.99375	4.04308	71.1087	76.2146	73.2085	66.6623	3.98798	67.1207	75.0967	0.391156	0.505728	0.436565	0.300945	0.0850571	0.476213	0.306099	28.8913	23.7854	26.7915	33.3377	3.98798	24.9033	32.8793	-0.391156	1.37631	1.428	1.52294	0.0607214	-0.451877	-0.330434	0	0	0	0	0	0	0	#NUM!	#NUM!	#NUM!	#NUM!	#NUM!	#NUM!	#NUM!
35.5	0.99486	3.78906	72.9214	77.6915	74.5658	69.0243	3.5839	69.3375	76.5053	0.430229	0.541903	0.467122	0.34798	0.0798559	0.510085	0.350374	27.0786	22.3085	25.4342	30.9757	3.5839	23.4947	30.6625	-0.430229	1.34847	1.40542	1.49102	0.0585868	-0.488816	-0.371643	0	0	0	0	0	0	0	#NUM!	#NUM!	#NUM!	#NUM!	#NUM!	#NUM!	#NUM!
36	0.97646	8.05329	64.6607	71.1893	67.0838	58.7107	5.19272	59.468	69.8534	0.262382	0.39286	0.309208	0.152879	0.0994581	0.36184	0.162924	35.3393	28.8107	32.9162	41.2893	5.19272	30.1466	40.532	-0.262382	1.45955	1.51741	1.61584	0.0645151	-0.326897	-0.197867	0	0	0	0	0	0	0	#NUM!	#NUM!	#NUM!	#NUM!	#NUM!	#NUM!	#NUM!
37	0.99845	2.03303	83.6283	87.1423	85.1837	80.5959	2.74348	80.8848	86.3718	0.708259	0.831067	0.759616	0.618419	0.0883559	0.796615	0.619904	16.3717	12.8577	14.8163	19.4041	2.74348	13.6282	19.1152	-0.708259	1.10916	1.17074	1.28789	0.0741333	-0.782393	-0.634126	0	0	0	0	0	0	0	#NUM!	#NUM!	#NUM!	#NUM!	#NUM!	#NUM!	#NUM!
38	0.99691	2.81229	75.4414	79.1111	77.1011	72.416	2.80505	72.6364	78.2465	0.487406	0.578321	0.527246	0.419177	0.0663446	0.553751	0.421062	24.5586	20.8889	22.8989	27.584	2.80505	21.7535	27.3636	-0.487406	1.31992	1.35981	1.44066	0.0502283	-0.537635	-0.437178	0	0	0	0	0	0	0	#NUM!	#NUM!	#NUM!	#NUM!	#NUM!	#NUM!	#NUM!
39	0.99776	2.47045	72.9826	76.0916	75.3381	70.1247	2.65312	70.3295	75.6357	0.431576	0.502785	0.484988	0.370558	0.0585899	0.490166	0.372986	27.0174	23.9084	24.6619	29.8753	2.65312	24.3643	29.6705	-0.431576	1.37855	1.39203	1.47531	0.0427928	-0.474369	-0.388783	0	0	0	0	0	0	0	#NUM!	#NUM!	#NUM!	#NUM!	#NUM!	#NUM!	#NUM!
40	0.99944	1.18033	77.6564	80.8311	79.222	75.0587	2.43228	75.2241	80.0887	0.541025	0.624982	0.581243	0.478481	0.0614052	0.60243	0.479619	21.4799	16.8504	19.3372	24.7247	3.28656	18.1933	24.7664	-0.562949	1.22661	1.28639	1.39313	0.0688764	-0.631825	-0.494072	0.86369	2.31844	1.44078	0.21663	0.861938	0.0017519	1.72563	-2.05987	-1.62462	-1.8351	-2.66334	0.448359	-2.50823	-1.61152
41	0.99418	3.79561	71.6888	75.6684	73.4767	68.416	3.03702	68.6517	74.7258	0.403492	0.492744	0.442521	0.33569	0.0654905	0.468983	0.338002	28.3112	24.3316	26.5234	31.584	3.03702	25.2742	31.3483	-0.403492	1.38617	1.42363	1.49947	0.0471296	-0.450622	-0.356363	0	0	0	0	0	0	0	#NUM!	#NUM!	#NUM!	#NUM!	#NUM!	#NUM!	#NUM!
42	0.99738	2.52628	67.7309	69.6141	70.2759	65.8739	1.93806	65.7929	69.669	0.322001	0.360024	0.373699	0.285627	0.0386991	0.3607	0.283302	31.3627	27.082	29.0429	34.1261	2.9684	28.3943	34.3311	-0.340146	1.43268	1.46304	1.53309	0.0420441	-0.38219	-0.298102	0.90633	3.30389	0.68121	0	1.42432	-0.51799	2.33065	-2.03876	-1.46638	-2.16375	#NUM!	#NUM!	#NUM!	#NUM!
43	0.98213	6.97198	65.8381	71.7544	68.1862	60.5383	4.67882	61.1593	70.517	0.284936	0.404897	0.331081	0.185854	0.090994	0.37593	0.193942	34.1619	28.2456	31.8138	39.4617	4.67882	29.483	38.8407	-0.284936	1.45095	1.50262	1.59618	0.0601044	-0.34504	-0.224831	0	0	0	0	0	0	0	#NUM!	#NUM!	#NUM!	#NUM!	#NUM!	#NUM!	#NUM!
44	0.99932	1.30006	77.2216	80.6809	78.594	74.6403	2.50503	74.7166	79.7267	0.530216	0.620784	0.564854	0.468829	0.0627513	0.592968	0.467465	22.457	18.0929	19.7548	25.3597	3.10883	19.3482	25.5658	-0.538191	1.25751	1.29567	1.40414	0.0621151	-0.600306	-0.476076	0.32139	1.22614	1.65121	0	0.700047	-0.378657	1.02144	-2.49157	-1.9061	-1.77497	#NUM!	#NUM!	#NUM!	#NUM!
45	0.99809	2.28847	77.9308	81.9327	79.3812	74.9059	2.90428	75.0265	80.8351	0.547922	0.656563	0.585455	0.474945	0.0747248	0.622647	0.473197	22.0692	18.0673	20.6188	25.0941	2.90428	19.1649	24.9735	-0.547922	1.25689	1.31426	1.39957	0.0586189	-0.606541	-0.489303	0	0	0	0	0	0	0	#NUM!	#NUM!	#NUM!	#NUM!	#NUM!	#NUM!	#NUM!
46.5	0.99506	3.64159	75.3496	79.8833	76.9691	71.7101	3.38217	71.9674	78.7318	0.485257	0.5989	0.524006	0.403949	0.0802972	0.565554	0.40496	24.6504	20.1167	23.0309	28.2899	3.38217	21.2682	28.0326	-0.485257	1.30356	1.36231	1.45163	0.0608793	-0.546137	-0.424378	0	0	0	0	0	0	0	#NUM!	#NUM!	#NUM!	#NUM!	#NUM!	#NUM!	#NUM!
47.5	0.99867	1.891	79.126	82.8284	80.5425	76.463	2.63284	76.4932	81.7589	0.578714	0.683369	0.616939	0.5117	0.0706781	0.649392	0.508036	20.874	17.1716	19.4575	23.537	2.63284	18.2411	23.5068	-0.578714	1.23481	1.28909	1.37175	0.056305	-0.635019	-0.522409	0	0	0	0	0	0	0	#NUM!	#NUM!	#NUM!	#NUM!	#NUM!	#NUM!	#NUM!
49	0.99952	1.09094	79.1799	82.1405	80.4962	76.3386	2.44159	76.7383	81.6215	0.580131	0.662689	0.615656	0.508703	0.0644314	0.644563	0.5157	19.4949	15.294	17.7737	22.0249	2.77941	16.7155	22.2743	-0.615903	1.18452	1.24978	1.34291	0.0649963	-0.680899	-0.550907	1.32527	2.56545	1.73013	1.63655	0.417582	0.907688	1.74285	-1.8719	-1.57955	-1.75434	-1.7789	0.0887556	-1.96066	-1.78315
50	0.9988	1.76994	73.4617	77.8886	75.7548	70.7981	2.97019	70.4915	76.4319	0.442188	0.546857	0.494785	0.38461	0.0676383	0.509826	0.37455	26.5383	22.1114	24.2452	29.2019	2.97019	23.5681	29.5085	-0.442188	1.34462	1.38463	1.46541	0.0502424	-0.49243	-0.391946	0	0	0	0	0	0	0	#NUM!	#NUM!	#NUM!	#NUM!	#NUM!	#NUM!	#NUM!
51	0.99733	2.67302	76.096	80.4219	78.0631	72.9296	3.12782	72.9681	79.2238	0.50289	0.613602	0.551269	0.43041	0.0760496	0.57894	0.426841	23.904	19.5782	21.9369	27.0704	3.12782	20.7762	27.0319	-0.50289	1.29177	1.34118	1.43249	0.0582929	-0.561183	-0.444597	0	0	0	0	0	0	0	#NUM!	#NUM!	#NUM!	#NUM!	#NUM!	#NUM!	#NUM!
52	0.9971	2.89691	79.6946	83.8483	81.1353	76.4156	3.07105	76.6235	82.7656	0.593816	0.715277	0.633561	0.510557	0.0841414	0.677957	0.509675	20.3055	16.1517	18.8647	23.5844	3.07105	17.2344	23.3765	-0.593816	1.20822	1.27565	1.37263	0.0674795	-0.661295	-0.526337	0	0	0	0	0	0	0	#NUM!	#NUM!	#NUM!	#NUM!	#NUM!	#NUM!	#NUM!
53	0.98706	5.84034	67.2567	73.2573	69.4599	62.0412	4.65784	62.5988	71.9145	0.312613	0.437646	0.356864	0.213368	0.0927468	0.405359	0.219866	32.7433	26.7427	30.5401	37.9588	4.65784	28.0855	37.4012	-0.312613	1.4272	1.48487	1.57931	0.0626997	-0.375312	-0.249913	0	0	0	0	0	0	0	#NUM!	#NUM!	#NUM!	#NUM!	#NUM!	#NUM!	#NUM!
54	0.99764	2.51568	78.164	82.0379	79.4624	74.2057	3.25931	74.9047	81.4233	0.553833	0.659658	0.587611	0.458915	0.0830336	0.636867	0.4708	21.836	17.9621	20.5376	25.7943	3.25931	18.5767	25.0953	-0.553833	1.25436	1.31255	1.41152	0.0648787	-0.618712	-0.488954	0	0	0	0	0	0	0	#NUM!	#NUM!	#NUM!	#NUM!	#NUM!	#NUM!	#NUM!
55	0.99705	2.69734	72.7453	76.9603	74.6626	69.5486	3.09778	69.6475	75.8431	0.426364	0.523791	0.469342	0.358682	0.0686953	0.495059	0.357668	27.2547	23.0397	25.3374	30.4514	3.09778	24.1569	30.3525	-0.426364	1.36248	1.40376	1.48361	0.0502797	-0.476643	-0.376084	0	0	0	0	0	0	0	#NUM!	#NUM!	#NUM!	#NUM!	#NUM!	#NUM!	#NUM!
56	0.9904	4.98118	68.9018	73.1385	70.3694	64.6241	3.54604	65.3558	72.4479	0.345496	0.435015	0.375643	0.261687	0.0719207	0.417416	0.273575	31.0982	26.8616	29.6306	35.3759	3.54604	27.5521	34.6442	-0.345496	1.42913	1.47174	1.54871	0.0494839	-0.39498	-0.296012	0	0	0	0	0	0	0	#NUM!	#NUM!	#NUM!	#NUM!	#NUM!	#NUM!	#NUM!
57	0.99816	2.23848	75.8556	80.2377	77.4658	72.9285	3.01284	72.8428	78.8685	0.497172	0.608542	0.536268	0.430386	0.0731621	0.570334	0.42401	24.1444	19.7623	22.5342	27.0715	3.01284	21.1315	27.1572	-0.497172	1.29584	1.35284	1.43251	0.0560525	-0.553225	-0.44112	0	0	0	0	0	0	0	#NUM!	#NUM!	#NUM!	#NUM!	#NUM!	#NUM!	#NUM!
58	0.99606	3.17108	71.5316	76.1068	73.8215	68.6137	3.13564	68.396	74.6673	0.400135	0.50315	0.450239	0.339671	0.0681093	0.468245	0.332026	28.4684	23.8932	26.1785	31.3863	3.13564	25.3327	31.604	-0.400135	1.37827	1.41794	1.49674	0.0492348	-0.44937	-0.350901	0	0	0	0	0	0	0	#NUM!	#NUM!	#NUM!	#NUM!	#NUM!	#NUM!	#NUM!
59	0.99919	1.42532	77.2758	81.0819	79.0426	74.611	2.70124	74.5746	79.9771	0.531556	0.632045	0.576523	0.468156	0.0680568	0.599612	0.463499	22.0561	17.6487	19.6665	25.3891	3.27841	18.7777	25.3345	-0.548254	1.24671	1.29373	1.40465	0.0662121	-0.614466	-0.482042	0.66809	1.26946	1.2909	0	0.603546	0.0645439	1.27164	-2.17225	-1.89083	-1.88346	#NUM!	#NAME?	#NUM!	#NUM!
60	0.99535	3.38722	74.9837	78.3479	75.9469	73.2341	2.089	72.8947	77.0727	0.476743	0.558527	0.499339	0.437131	0.0495648	0.526308	0.427178	15.315	12.437	13.4549	17.3435	2.11425	13.2008	17.4293	-0.742689	1.09472	1.12888	1.23914	0.0616267	-0.804316	-0.681062	9.70132	9.21508	10.5982	9.42243	0.609038	9.09228	10.3104	-0.968851	-0.993515	-0.926115	-0.982858	0.0295823	-0.998433	-0.939268
61	0.99012	4.82751	70.9149	72.7202	71.076	69.3858	1.3613	69.5536	72.2762	0.387067	0.425815	0.390465	0.355349	0.0287677	0.415835	0.3583	14.9487	7.87648	11.989	14.4362	2.70662	12.242	17.6553	-0.755079	0.896332	1.07878	1.15945	0.110065	-0.865144	-0.645014	14.1364	19.4033	16.935	16.1779	1.37714	12.7593	15.5136	-0.783469	-0.618442	-0.690632	-0.714436	0.0408151	-0.824284	-0.742654
62	0.99881	1.73787	74.8969	78.8915	76.844	72.2136	2.79338	72.1035	77.6903	0.474736	0.572572	0.520947	0.414787	0.0656855	0.540422	0.409051	25.1031	21.1085	23.156	27.7864	2.79338	22.3097	27.8965	-0.474736	1.32446	1.36466	1.44383	0.0495921	-0.524329	-0.425144	0	0	0	0	0	0	0	#NUM!	#NUM!	#NUM!	#NUM!	#NUM!	#NUM!	#NUM!
63	0.99886	1.68859	78.5645	82.6711	80.8987	76.4005	2.63937	75.9251	81.2039	0.564093	0.678582	0.62688	0.510192	0.0704306	0.634524	0.493662	21.4355	17.3289	19.1013	23.5996	2.63937	18.7961	24.0749	-0.564093	1.23877	1.28106	1.3729	0.0559909	-0.620084	-0.508102	0	0	0	0	0	0	0	#NUM!	#NUM!	#NUM!	#NUM!	#NUM!	#NUM!	#NUM!
64	0.99224	4.46511	71.4402	76.6367	73.0439	67.3414	3.82722	67.613	75.2675	0.398188	0.515902	0.432927	0.314285	0.0827382	0.480927	0.31545	28.5598	23.3633	26.9561	32.6586	3.82722	24.7325	32.387	-0.398188	1.36853	1.43066	1.514	0.0595952	-0.457784	-0.338593	0	0	0	0	0	0	0	#NUM!	#NUM!	#NUM!	#NUM!	#NUM!	#NUM!	#NUM!
65	0.98633	6.1033	67.8561	73.4878	69.6234	63.3507	4.1772	63.6789	72.0333	0.324491	0.442769	0.360216	0.237685	0.0842535	0.408744	0.240237	32.1439	26.5122	30.3766	36.6493	4.1772	27.9667	36.3211	-0.324491	1.42345	1.48254	1.56407	0.0576507	-0.382141	-0.26684	0	0	0	0	0	0	0	#NUM!	#NUM!	#NUM!	#NUM!	#NUM!	#NUM!	#NUM!
66	0.98585	5.93988	62.4987	68.6032	64.3641	57.7117	4.4827	58.016	66.9814	0.221825	0.339459	0.256757	0.135043	0.0839576	0.305782	0.137867	37.5013	31.3968	35.6359	42.2883	4.4827	33.0186	41.984	-0.221825	1.49689	1.55189	1.62622	0.0529972	-0.274822	-0.168827	0	0	0	0	0	0	0	#NUM!	#NUM!	#NUM!	#NUM!	#NUM!	#NUM!	#NUM!
67	0.99894	1.62973	81.5399	84.5933	82.621	78.6118	2.4887	79.0512	84.0286	0.645136	0.739627	0.677065	0.565313	0.0721017	0.717237	0.573034	18.4601	15.0294	17.379	21.3882	2.6253	15.8348	21.0854	-0.645136	1.17694	1.24003	1.33017	0.062882	-0.708018	-0.582254	0	0.37732	0	0	0.17787	-0.17787	0.17787	#NUM!	-2.42165	#NUM!	#NUM!	#NUM!	#NUM!	#NUM!
68	0.99087	4.7401	68.7163	73.3418	71.1538	65.8522	3.14446	65.5719	71.8608	0.341742	0.439521	0.392109	0.285207	0.0645399	0.406282	0.277202	31.2837	26.6582	28.8462	34.1478	3.14446	28.1392	34.4281	-0.341742	1.42583	1.46009	1.53336	0.0448527	-0.386595	-0.296889	0	0	0	0	0	0	0	#NUM!	#NUM!	#NUM!	#NUM!	#NUM!	#NUM!	#NUM!
69	0.99712	2.85619	76.377	80.8661	78.351	73.1362	3.21925	73.1578	79.5963	0.509628	0.625962	0.558608	0.434964	0.0790954	0.588723	0.430533	23.623	19.1339	21.649	26.8638	3.21925	20.4037	26.8422	-0.509628	1.2818	1.33544	1.42917	0.060899	-0.570527	-0.448729	0	0	0	0	0	0	0	#NUM!	#NUM!	#NUM!	#NUM!	#NUM!	#NUM!	#NUM!
70	0.99881	1.72816	80.4063	83.2279	81.1485	77.9904	2.15325	78.2531	82.5596	0.613174	0.695681	0.633935	0.549429	0.0599475	0.673121	0.553226	16.0098	12.1895	14.1138	18.9971	2.86539	13.1444	18.8752	-0.719842	1.08599	1.14964	1.27869	0.080166	-0.800008	-0.639676	3.58386	4.58265	4.7377	3.01247	0.779311	2.80455	4.36317	-1.4298	-1.31851	-1.30335	-1.50779	0.0930073	-1.52281	-1.33679
71	0.99857	1.84857	70.6064	73.0286	70.8338	68.5785	1.81681	68.7896	72.4232	0.380592	0.43259	0.385361	0.338961	0.0382244	0.418816	0.342368	18.6768	14.8161	15.9883	20.3657	2.38826	16.2885	21.065	-0.638913	1.17073	1.2038	1.3089	0.0589055	-0.697818	-0.580007	10.7168	12.1553	13.1779	11.0558	0.866529	9.85025	11.5833	-0.920706	-0.858951	-0.818785	-0.905528	0.0354449	-0.95615	-0.885261
72	0.98535	5.84768	67.5461	70.1828	68.5456	65.9334	1.74998	65.7961	69.2961	0.318333	0.371764	0.338298	0.286776	0.0349562	0.353289	0.283377	18.1297	13.9883	16.653	20.2358	2.5597	15.57	20.6894	-0.654736	1.14576	1.22149	1.30612	0.0654987	-0.720235	-0.589238	14.3242	15.8289	14.8014	13.8309	0.815815	13.5084	15.1401	-0.776786	-0.725711	-0.760128	-0.794502	0.0280838	-0.80487	-0.748703
73.27	0.98775	5.42576	67.4556	70.6903	68.5939	65.309	2.21471	65.2409	69.6704	0.316543	0.382349	0.339271	0.274756	0.0442144	0.360757	0.272328	25.9965	22.5067	22.6916	28.8424	2.94408	23.0525	28.9406	-0.454336	1.35231	1.35587	1.46003	0.0499633	-0.5043	-0.404373	6.54783	6.803	8.71446	5.84858	1.19154	5.35629	7.73937	-1.15449	-1.1367	-1.02016	-1.20678	0.0769684	-1.23146	-1.07752
73.7	0.99779	2.36111	76.1105	78.9924	77.6924	74.0268	2.10247	74.008	78.2129	0.503236	0.575208	0.541925	0.454863	0.0507394	0.553976	0.452497	23.8895	21.0076	22.3076	25.9732	2.10247	21.7871	25.992	-0.503236	1.32238	1.34845	1.41453	0.0387827	-0.542019	-0.464454	0	0	0	0	0	0	0	#NUM!	#NUM!	#NUM!	#NUM!	#NUM!	#NUM!	#NUM!
74.13	0.99976	0.77437	71.1971	73.7644	73.0449	69.4088	1.90643	69.2906	73.1035	0.393025	0.448955	0.43295	0.355818	0.0406613	0.433687	0.352364	28.8029	24.8691	26.9551	30.5912	2.36446	26.4385	31.1674	-0.393025	1.39566	1.43064	1.4856	0.0370174	-0.430043	-0.356008	0	1.36657	0	0	0.644207	-0.644207	0.644207	#NUM!	-1.85839	#NUM!	#NUM!	#NUM!	#NUM!	#NUM!
74.56	0.99704	2.72236	67.0532	70.3537	69.0493	64.4253	2.54357	64.5096	69.5968	0.308606	0.375316	0.348488	0.257915	0.0502284	0.358834	0.258377	32.9468	29.6463	30.9507	35.5747	2.54357	30.4032	35.4904	-0.308606	1.47197	1.49067	1.55114	0.0337873	-0.342393	-0.274819	0	0	0	0	0	0	0	#NUM!	#NUM!	#NUM!	#NUM!	#NUM!	#NUM!	#NUM!
74.99	0.99751	2.53988	72.7213	75.6402	74.5745	70.5926	2.17227	70.5491	74.8936	0.425839	0.492078	0.46732	0.380302	0.0479338	0.473772	0.377905	27.2787	24.3598	25.4255	29.4074	2.17227	25.1064	29.4509	-0.425839	1.38667	1.40527	1.46846	0.0350027	-0.460841	-0.390836	0	0	0	0	0	0	0	#NUM!	#NUM!	#NUM!	#NUM!	#NUM!	#NUM!	#NUM!
75.42	0.99774	2.49689	80.6335	84.1772	82.3574	77.7511	2.70438	77.9291	83.3379	0.619465	0.725911	0.669139	0.543399	0.0762629	0.695728	0.543202	19.3665	15.8228	17.6426	22.2489	2.70438	16.6621	22.0709	-0.619465	1.19928	1.24656	1.34731	0.0617306	-0.681196	-0.557734	0	0	0	0	0	0	0	#NUM!	#NUM!	#NUM!	#NUM!	#NUM!	#NUM!	#NUM!
75.86	0.99909	1.53982	74.7768	77.2148	76.5594	72.8878	1.90415	72.8726	76.681	0.471967	0.530047	0.51403	0.429491	0.0441146	0.516081	0.427852	25.2232	22.7852	23.4406	27.1122	1.90415	23.319	27.1274	-0.471967	1.35765	1.36997	1.43316	0.0330777	-0.505044	-0.438889	0	0	0	0	0	0	0	#NUM!	#NUM!	#NUM!	#NUM!	#NUM!	#NUM!	#NUM!
76.29	0.99758	2.58298	79.5789	82.8427	81.1401	77.0644	2.42437	77.1546	82.0033	0.59072	0.683804	0.633695	0.526343	0.0656837	0.656404	0.525036	20.4211	17.1573	18.8599	22.9356	2.42437	17.9967	22.8454	-0.59072	1.23445	1.27554	1.36051	0.0524929	-0.643213	-0.538227	0	0	0	0	0	0	0	#NUM!	#NUM!	#NUM!	#NUM!	#NUM!	#NUM!	#NUM!
76.72	0.99879	1.79334	73.5491	76.689	75.5603	70.8675	2.52072	71.0284	76.0698	0.444137	0.517173	0.490198	0.386069	0.0565277	0.500665	0.38761	26.4509	23.311	24.4397	29.1325	2.52072	23.9302	28.9716	-0.444137	1.36756	1.3881	1.46438	0.0416522	-0.48579	-0.402485	0	0	0	0	0	0	0	#NUM!	#NUM!	#NUM!	#NUM!	#NUM!	#NUM!	#NUM!
77.15	0.99712	2.7654	78.0889	82.1849	79.7515	74.8197	3.06395	75.0249	81.1528	0.551925	0.664004	0.595345	0.472955	0.0790168	0.630941	0.472908	21.9111	17.8151	20.2485	25.1803	3.06395	18.8472	24.9751	-0.551925	1.25079	1.30639	1.40106	0.0620356	-0.61396	-0.489889	0	0	0	0	0	0	0	#NUM!	#NUM!	#NUM!	#NUM!	#NUM!	#NUM!	#NUM!
77.58	0.99867	1.86184	68.9006	72.3443	70.8895	65.9582	2.73284	66.1677	71.6334	0.345471	0.417619	0.386532	0.287256	0.0555942	0.401065	0.289877	31.0994	27.6558	29.1105	34.0418	2.73284	28.3666	33.8323	-0.345471	1.44179	1.46405	1.53201	0.0383776	-0.383848	-0.307093	0	0	0	0	0	0	0	#NUM!	#NUM!	#NUM!	#NUM!	#NUM!	#NUM!	#NUM!
78.02	0.99916	1.46249	71.9177	74.9326	73.4379	69.822	2.14548	69.7723	74.0632	0.408404	0.475562	0.441658	0.364301	0.0465623	0.454966	0.361841	28.0823	24.9141	26.5621	30.178	2.19847	25.8838	30.2807	-0.408404	1.39645	1.42426	1.47969	0.0346023	-0.443006	-0.373801	0	0.15328	0	0	0.0722569	-0.0722569	0.0722569	#NUM!	-2.81385	#NUM!	#NUM!	#NUM!	#NUM!	#NUM!
78.45	0.9977	2.47031	74.5016	77.8492	76.3953	71.6785	2.63396	71.8676	77.1356	0.465652	0.545864	0.510069	0.403272	0.0605707	0.526223	0.405082	25.4984	22.1508	23.6046	28.3215	2.63396	22.8644	28.1324	-0.465652	1.34539	1.373	1.45212	0.045231	-0.510883	-0.420421	0	0	0	0	0	0	0	#NUM!	#NUM!	#NUM!	#NUM!	#NUM!	#NUM!	#NUM!
78.88	0.99463	3.84747	75.0433	79.2425	76.7989	71.5644	3.20284	71.8405	78.2462	0.478125	0.581782	0.519845	0.400835	0.0750865	0.553212	0.403039	24.9567	20.7575	23.2011	28.4356	3.20284	21.7538	28.1595	-0.478125	1.31718	1.36551	1.45386	0.0565937	-0.534719	-0.421532	0	0	0	0	0	0	0	#NUM!	#NUM!	#NUM!	#NUM!	#NUM!	#NUM!	#NUM!
79.74	0.99735	2.59714	66.7594	70.1463	68.9039	63.9639	2.67021	64.0892	69.4296	0.302844	0.371007	0.345538	0.249197	0.0524597	0.355303	0.250384	33.2406	29.8537	31.0961	36.0361	2.67021	30.5704	35.9108	-0.302844	1.475	1.49271	1.55674	0.0351112	-0.337955	-0.267733	0	0	0	0	0	0	0	#NUM!	#NUM!	#NUM!	#NUM!	#NUM!	#NUM!	#NUM!
80.17	0.99712	2.68156	69.0083	72.125	71.0403	66.3723	2.49577	66.5126	71.5041	0.347657	0.412871	0.389711	0.29529	0.0508558	0.398513	0.296801	30.9916	27.875	28.9597	33.6277	2.49577	28.4959	33.4874	-0.347657	1.44521	1.46179	1.5267	0.0351608	-0.382818	-0.312496	0	0	0	0	0	0	0	#NUM!	#NUM!	#NUM!	#NUM!	#NUM!	#NUM!	#NUM!
80.61	0.99851	1.92645	70.2362	73.8064	71.8054	67.4648	2.647	67.5892	72.8832	0.372872	0.449899	0.40599	0.316724	0.0554093	0.428282	0.317463	29.7638	26.1936	28.1946	32.5352	2.647	27.1168	32.4108	-0.372872	1.4182	1.45017	1.51235	0.0390939	-0.411966	-0.333779	0	0	0	0	0	0	0	#NUM!	#NUM!	#NUM!	#NUM!	#NUM!	#NUM!	#NUM!
81.04	0.99422	3.92889	69.6295	74.2032	71.417	65.9472	3.42937	66.2001	73.0589	0.360341	0.458858	0.397695	0.287043	0.0711064	0.431447	0.289234	30.3705	25.7968	28.583	34.0528	3.42937	26.9411	33.7999	-0.360341	1.41157	1.45611	1.53215	0.0497868	-0.410128	-0.310554	0	0	0	0	0	0	0	#NUM!	#NUM!	#NUM!	#NUM!	#NUM!	#NUM!	#NUM!
81.47	0.99242	4.43214	64.695	68.8989	66.7755	61.2595	3.21965	61.4754	67.9147	0.263035	0.345436	0.303158	0.199008	0.0615322	0.324568	0.201503	35.3049	31.1011	33.2245	38.7405	3.21965	32.0853	38.5246	-0.263035	1.49278	1.52146	1.58817	0.0399606	-0.302996	-0.223075	0	0	0	0	0	0	0	#NUM!	#NUM!	#NUM!	#NUM!	#NUM!	#NUM!	#NUM!
81.9	0.99703	2.82157	67.4207	71.0852	69.3306	64.4603	2.80254	64.6181	70.2232	0.315851	0.39066	0.354219	0.258579	0.0556981	0.371549	0.260153	32.5793	28.9148	30.6694	35.5397	2.80254	29.7768	35.3819	-0.315851	1.46112	1.48671	1.55071	0.0376811	-0.353532	-0.27817	0	0	0	0	0	0	0	#NUM!	#NUM!	#NUM!	#NUM!	#NUM!	#NUM!	#NUM!
82.33	0.99708	2.66539	64.2569	67.984	66.3535	61.2026	2.89013	61.3668	67.1471	0.254728	0.327039	0.294923	0.197968	0.0548645	0.309592	0.199863	35.7431	30.8981	33.6465	38.7974	3.27418	32.4689	39.0173	-0.254728	1.48993	1.52694	1.5888	0.0407864	-0.295514	-0.213942	0	1.1179	0	0	0.526983	-0.526983	0.526983	#NUM!	-1.94671	#NUM!	#NUM!	#NUM!	#NUM!	#NUM!
82.77	0.99933	1.27054	65.8789	68.9223	67.4566	63.6047	2.24258	63.6363	68.1215	0.285723	0.345911	0.316561	0.242443	0.0435384	0.329262	0.242185	28.0444	24.2402	26.2052	29.9785	2.38113	25.6633	30.4255	-0.409218	1.38454	1.41839	1.47681	0.0381135	-0.447332	-0.371105	6.07669	6.83752	6.33824	6.4168	0.219205	5.85748	6.2959	-1.18911	-1.13434	-1.16959	-1.16388	0.0154479	-1.20455	-1.17366
83.2	0.99935	1.2602	67.8313	71.1825	69.6116	65.1622	2.54971	65.2816	70.381	0.323996	0.392716	0.359975	0.271944	0.050998	0.374994	0.272998	30.2532	25.7887	28.1943	33.1602	3.06929	27.1839	33.3225	-0.362753	1.41143	1.45016	1.52062	0.0451981	-0.407951	-0.317555	1.91552	3.0288	2.19408	1.67767	0.556676	1.35884	2.4722	-1.70931	-1.50537	-1.64911	-1.76795	0.107356	-1.81667	-1.60196
83.63	0.99818	2.14672	68.087	71.7186	70.125	65.1968	2.77611	65.3109	70.8631	0.329097	0.404131	0.370564	0.272607	0.0557984	0.384895	0.273299	31.913	28.2814	29.875	34.8032	2.77611	29.1369	34.6891	-0.329097	1.4515	1.47531	1.54162	0.0381304	-0.367227	-0.290967	0	0	0	0	0	0	0	#NUM!	#NUM!	#NUM!	#NUM!	#NUM!	#NUM!	#NUM!
84.06	0.99944	1.18437	69.5158	72.2865	71.4249	67.1507	2.24568	67.2701	71.7615	0.358009	0.416366	0.397861	0.310524	0.0461551	0.404164	0.311854	28.6981	23.8146	27.1738	31.8269	3.28518	25.413	31.9833	-0.395247	1.37684	1.43415	1.50279	0.0514885	-0.446735	-0.343758	1.78603	3.89889	1.40131	1.02245	1.27608	0.509953	3.06211	-1.74028	-1.39179	-1.84734	-1.98589	0.253791	-1.99408	-1.48649
84.49	0.99776	2.32725	63.9117	67.5052	65.8859	61.0513	2.74161	61.1701	66.6533	0.248214	0.317523	0.285859	0.195202	0.0518369	0.300051	0.196377	35.2558	30.8291	33.5117	38.0375	2.97473	32.2811	38.2305	-0.26397	1.48896	1.5252	1.58021	0.0375153	-0.301485	-0.226455	0.83249	1.66575	0.60241	0.91118	0.446643	0.385847	1.27913	-2.07599	-1.77109	-2.21748	-2.03642	0.183316	-2.25931	-1.89267
84.92	0.9967	2.90204	64.2942	68.4618	66.1028	61.0481	3.0926	61.2016	67.3868	0.255433	0.336612	0.290056	0.195144	0.0588679	0.314301	0.196565	35.7058	31.5382	33.8972	38.9519	3.0926	32.6132	38.7984	-0.255433	1.49884	1.53016	1.59053	0.0380535	-0.293487	-0.21738	0	0	0	0	0	0	0	#NUM!	#NUM!	#NUM!	#NUM!	#NUM!	#NUM!	#NUM!
85.36	0.99877	1.71853	63.117	66.6059	64.9562	60.3919	2.62821	60.4888	65.7452	0.233321	0.299843	0.268009	0.183195	0.0492312	0.282552	0.18409	34.7165	30.3921	31.7797	38.4507	3.51773	31.1987	38.2342	-0.274268	1.48276	1.50215	1.5849	0.044294	-0.318562	-0.229974	2.1665	3.00196	3.26419	1.15732	0.937512	1.22899	3.10401	-1.65473	-1.50936	-1.47181	-1.93149	0.20841	-1.86314	-1.44632
85.79	0.99857	1.8605	69.3824	72.3525	71.3356	66.885	2.3743	67.0081	71.7567	0.355278	0.417797	0.395964	0.305303	0.0487063	0.403984	0.306572	26.2374	21.7598	25.0964	28.1658	2.61603	23.6214	28.8534	-0.448915	1.33765	1.39961	1.44972	0.0458368	-0.494752	-0.403078	4.38018	5.88776	3.56798	4.94918	0.952775	3.4274	5.33296	-1.33906	-1.2037	-1.4318	-1.28342	0.0945179	-1.43357	-1.24454
86.22	0.99962	1.01227	77.0528	79.8504	78.7133	74.9129	2.11121	74.9416	79.164	0.526059	0.598011	0.56794	0.475107	0.0523108	0.57837	0.473748	22.9472	20.066	21.2867	25.0871	2.13812	20.8091	25.0853	-0.526059	1.30246	1.32811	1.39945	0.0410343	-0.567093	-0.485024	0	0.08357	0	0	0.0393953	-0.0393953	0.0393953	#NUM!	-3.07759	#NUM!	#NUM!	#NUM!	#NUM!	#NUM!
86.65	0.9991	1.55354	76.8201	80.5218	78.5132	74.0017	2.72642	74.0937	79.5465	0.520364	0.616366	0.562772	0.454297	0.0674169	0.587781	0.452947	23.1799	19.4782	21.4868	25.9983	2.72642	20.4535	25.9063	-0.520364	1.28955	1.33217	1.41494	0.0520604	-0.572424	-0.468303	0	0	0	0	0	0	0	#NUM!	#NUM!	#NUM!	#NUM!	#NUM!	#NUM!	#NUM!
87.08	0.99943	1.18815	66.4856	70.324	68.2777	63.5973	2.81545	63.6702	69.3011	0.297497	0.374698	0.332914	0.242306	0.0552604	0.352757	0.242236	33.0841	28.4156	31.2959	36.0275	3.13802	29.9461	36.2221	-0.30591	1.45356	1.49549	1.55663	0.0423241	-0.348234	-0.263586	0.43026	1.2604	0.4264	0.37516	0.405768	0.0244917	0.836028	-2.3644	-1.89398	-2.36833	-2.42415	0.23786	-2.60226	-2.12654
87.52	0.99935	1.27077	72.4541	75.4561	74.4634	70.0761	2.33759	70.1165	74.7917	0.420006	0.487751	0.46478	0.369551	0.0511722	0.471178	0.368834	27.5459	23.9832	25.5366	29.9239	2.51558	25.0303	30.0615	-0.420006	1.37991	1.40716	1.47602	0.0404437	-0.46045	-0.379562	0	0.56066	0	0	0.264298	-0.264298	0.264298	#NUM!	-2.24886	#NUM!	#NUM!	#NUM!	#NUM!	#NUM!
87.95	0.9989	1.64713	78.5241	80.7833	80.0717	76.7617	1.7523	76.7718	80.2764	0.563052	0.623642	0.604008	0.51894	0.0454415	0.608493	0.51761	18.5285	14.0508	16.4579	21.4825	3.0961	15.4324	21.6246	-0.643165	1.1477	1.21637	1.33209	0.0760872	-0.719252	-0.567078	2.94738	5.16597	3.4704	1.75574	1.39223	1.55515	4.33961	-1.51757	-1.26381	-1.44428	-1.74785	0.199725	-1.7173	-1.31785
88.38	0.99938	1.242	75.6097	78.3842	77.204	73.4771	2.09129	73.5184	77.701	0.491361	0.559457	0.52978	0.442532	0.0496259	0.540987	0.441735	21.8719	17.7328	19.9396	24.4987	2.81727	19.0546	24.6891	-0.552922	1.24878	1.29972	1.38914	0.0580179	-0.61094	-0.494904	2.51842	3.88301	2.85641	2.02415	0.760258	1.75816	3.27868	-1.58779	-1.39363	-1.53159	-1.68488	0.118955	-1.70675	-1.46884
88.81	0.99938	1.24508	75.2985	78.3115	76.9646	73.1072	2.2055	73.093	77.5039	0.484062	0.557595	0.523896	0.434324	0.0520197	0.536082	0.432042	24.5572	19.8855	22.6671	26.8928	2.88089	21.6763	27.4381	-0.487438	1.29854	1.3554	1.42964	0.0536776	-0.541116	-0.433761	0.14433	1.80303	0.36829	0	0.77782	-0.63349	0.92215	-2.84002	-1.7361	-2.43221	#NUM!	#NUM!	#NUM!	#NUM!
89.24	0.99944	1.17479	75.7019	78.5806	77.0205	73.7237	2.02461	73.6773	77.7265	0.493535	0.564508	0.525265	0.448044	0.0483816	0.541916	0.445153	22.2566	18.1188	19.7788	25.3557	3.09533	19.1612	25.3519	-0.543206	1.25813	1.2962	1.40407	0.0618121	-0.605018	-0.481394	2.04154	3.30065	3.2007	0.92061	1.09916	0.942379	3.1407	-1.68108	-1.46682	-1.48063	-2.03191	0.26319	-1.94427	-1.41789
89.67	0.99943	1.18236	71.0505	73.5092	72.5633	69.1023	1.89427	69.1563	72.9448	0.389927	0.443247	0.422385	0.349566	0.0401579	0.430085	0.349769	24.5908	20.6422	22.4419	27.3742	2.8458	21.745	27.4366	-0.486651	1.31476	1.35106	1.43734	0.0514132	-0.538064	-0.435237	4.35862	5.84858	4.99479	3.52347	0.960317	3.3983	5.31894	-1.3413	-1.20678	-1.27923	-1.43745	0.0963179	-1.43761	-1.24498
90.11	0.99898	1.58055	75.2248	76.286	76.967	74.0398	1.25067	73.9741	76.4755	0.482344	0.50744	0.523955	0.455158	0.0293241	0.511668	0.45302	19.8305	15.1997	18.3429	22.8878	3.156	16.6745	22.9865	-0.606676	1.18184	1.26347	1.3596	0.0726545	-0.67933	-0.534021	4.94472	8.51431	4.69007	3.07234	2.28174	2.66298	7.22646	-1.28383	-1.0312	-1.30796	-1.49898	0.192034	-1.47587	-1.0918
90.54	0.99806	2.15799	71.2361	73.0771	72.0378	70.2963	1.14725	70.0889	72.3834	0.393853	0.43366	0.410989	0.374123	0.0245351	0.418388	0.369317	18.9837	14.9383	17.5379	20.7581	2.38041	16.6033	21.3641	-0.630192	1.1743	1.24398	1.31719	0.0583387	-0.68853	-0.571853	9.78019	11.9846	10.4244	8.94561	1.24081	8.53938	11.021	-0.964955	-0.865936	-0.934141	-1.00769	0.0578851	-1.02284	-0.90707
90.97	0.99542	3.31202	72.3482	74.1829	73.7983	70.8833	1.47321	70.875	73.8215	0.417705	0.458396	0.449718	0.386401	0.0320896	0.449795	0.385616	16.0958	12.475	14.5844	17.188	1.92757	14.1682	18.0234	-0.717071	1.09604	1.16389	1.23523	0.0568271	-0.773898	-0.660244	11.556	13.3421	11.6173	11.9287	0.750511	10.8054	12.3065	-0.883863	-0.812586	-0.881264	-0.86824	0.0297838	-0.913646	-0.854079
91.4	0.99407	3.75452	72.4611	74.1044	72.9143	71.87	0.912816	71.5482	73.3739	0.420157	0.456617	0.430073	0.407378	0.0201222	0.44028	0.400035	14.9849	11.0416	13.487	16.5148	2.23866	12.7463	17.2236	-0.753841	1.04303	1.12991	1.21787	0.0713796	-0.82522	-0.682461	12.554	14.8541	13.5987	11.6152	1.33337	11.2206	13.8874	-0.842958	-0.758319	-0.803022	-0.881353	0.0508499	-0.893808	-0.792108
91.83	0.99749	2.43691	66.8246	69.2952	67.5455	65.4886	1.55571	65.2689	68.3803	0.304121	0.353496	0.318321	0.278203	0.0307603	0.334881	0.273361	22.1759	19.0035	20.1284	23.5119	1.91599	20.2599	24.0919	-0.545232	1.27883	1.30381	1.37129	0.0390512	-0.584283	-0.506181	10.9994	11.7014	12.3261	10.9995	0.541875	10.4576	11.5413	-0.908022	-0.877717	-0.852045	-0.908019	0.0228772	-0.930899	-0.885145
92.27	0.99908	1.49262	67.2978	70.2266	68.6436	65.1674	2.11306	65.1848	69.4109	0.313425	0.372673	0.340275	0.272045	0.0419405	0.355365	0.271484	27.1813	23.0928	24.5066	30.2464	3.09333	24.088	30.2746	-0.427973	1.36348	1.38928	1.48067	0.0502807	-0.478254	-0.377692	5.52085	6.68059	6.84977	4.58617	1.02951	4.49134	6.55036	-1.23333	-1.14516	-1.13351	-1.31816	0.0844347	-1.31776	-1.1489
92.7	0.99864	1.82914	64.7372	67.3972	65.826	63.3482	1.66675	63.0704	66.4039	0.263837	0.315387	0.284702	0.237639	0.0319743	0.295811	0.231863	26.6887	23.3355	25.2608	27.4428	1.67789	25.0108	28.3666	-0.438843	1.36802	1.40245	1.43843	0.0287477	-0.467591	-0.410095	8.57408	9.26734	8.9132	9.20903	0.155038	8.41904	8.72912	-1.02788	-0.990809	-1.00942	-0.993829	0.00815623	-1.03604	-1.01973
93.13	0.99811	2.2508	75.0147	78.7997	76.9668	71.7853	2.97042	72.0443	77.9852	0.477463	0.570183	0.52395	0.405559	0.0693259	0.546788	0.408137	24.9853	21.2003	23.0332	28.2147	2.97042	22.0148	27.9557	-0.477463	1.32634	1.36235	1.45048	0.0521448	-0.529607	-0.425318	0	0	0	0	0	0	0	#NUM!	#NUM!	#NUM!	#NUM!	#NUM!	#NUM!	#NUM!
93.56	0.99895	1.62431	78.5447	80.792	80.022	76.7015	1.77485	76.7699	80.3196	0.563584	0.623886	0.602658	0.517476	0.0459828	0.609566	0.517601	19.5348	14.2391	17.4333	23.2985	3.75167	15.7832	23.2865	-0.614798	1.15348	1.24138	1.36733	0.0877612	-0.702559	-0.527037	1.9204	4.96888	2.54464	0	2.02874	-0.108335	3.94914	-1.70819	-1.28161	-1.58318	#NUM!	#NUM!	#NUM!	#NUM!
93.99	0.99796	2.23208	72.239	74.4638	74.0348	69.9887	2.01611	70.2229	74.2551	0.415337	0.46479	0.455045	0.367743	0.0436332	0.45897	0.371704	24.5407	18.0381	23.8582	28.3828	4.23421	20.3065	28.7749	-0.487827	1.25619	1.37764	1.45306	0.081098	-0.568925	-0.406729	3.22031	7.49803	2.107	1.62853	2.66131	0.558999	5.88162	-1.47789	-1.0912	-1.66709	-1.78107	0.301948	-1.77983	-1.17594
94.42	0.9989	1.63979	70.5527	73.3731	71.8734	68.3675	2.09754	68.4551	72.6502	0.379468	0.440216	0.40745	0.334715	0.0440888	0.423557	0.335379	25.6358	20.8696	23.5122	29.1929	3.47263	22.1631	29.1084	-0.462518	1.31951	1.37129	1.46528	0.0603337	-0.522852	-0.402184	3.81157	5.75734	4.61443	2.43962	1.37612	2.43545	5.18769	-1.40202	-1.21403	-1.31536	-1.60195	0.164279	-1.5663	-1.23774
94.86	0.99907	1.51386	74.8052	76.7861	76.2188	73.0522	1.64287	73.1623	76.448	0.47262	0.519534	0.505829	0.43311	0.0379255	0.510545	0.434694	21.2072	15.5459	19.6918	25.115	3.91817	17.289	25.1254	-0.570003	1.19162	1.29429	1.39993	0.0850485	-0.655051	-0.484954	3.98763	7.66804	4.08933	1.83278	2.40253	1.5851	6.39016	-1.38161	-1.08067	-1.37021	-1.72886	0.265122	-1.64673	-1.11649
95.29	0.99863	1.8338	73.7325	76.6312	75.1902	71.5008	2.16046	71.572	75.893	0.44824	0.515769	0.481538	0.399479	0.0487953	0.497036	0.399445	21.9726	17.7458	20.2979	24.2611	2.68058	19.292	24.6531	-0.550366	1.2491	1.30745	1.38491	0.0556287	-0.605995	-0.494738	4.29492	5.623	4.5119	4.23805	0.598853	3.69607	4.89377	-1.34798	-1.2249	-1.32559	-1.35403	0.0553993	-1.40338	-1.29258
95.72	0.9987	1.7694	71.6001	72.4773	73.7643	70.1686	1.48756	70.1125	73.0877	0.401597	0.420511	0.448954	0.371469	0.0320033	0.4336	0.369593	19.9356	14.4232	19.4331	22.5932	3.36378	16.5718	23.2994	-0.60381	1.15906	1.28854	1.35398	0.0809937	-0.684804	-0.522817	8.46432	13.0995	6.80262	7.23817	2.87122	5.5931	11.3355	-1.034	-0.821768	-1.13673	-1.10774	0.142134	-1.17613	-0.891864
96.15	0.99864	1.76453	66.9903	67.5941	66.8462	67.5971	0.353261	66.6371	67.3436	0.307371	0.319284	0.304543	0.319344	0.00696294	0.314334	0.300408	13.3696	10.6584	12.0248	13.5062	1.16294	12.2067	14.5326	-0.811551	1.02769	1.08008	1.13053	0.0419875	-0.853538	-0.769563	19.64	21.7475	21.129	18.8967	1.22443	18.4156	20.8645	-0.611897	-0.556089	-0.572039	-0.632653	0.0329826	-0.64488	-0.578914
96.58	0.996	3.12451	79.5596	80.5054	80.3944	79.0495	0.661705	78.8979	80.2213	0.590203	0.615911	0.612846	0.576705	0.0178034	0.608007	0.5724	10.8436	6.47747	9.29582	13.2446	2.7755	8.06814	13.6191	-0.914977	0.811405	0.968288	1.12204	0.126818	-1.0418	-0.788159	9.59675	13.0171	10.3097	7.70585	2.16846	7.42829	11.7652	-0.97406	-0.824918	-0.939497	-1.07835	0.103623	-1.07768	-0.870437
97.02	0.99871	1.76676	69.6822	71.7422	70.4008	68.6271	1.27584	68.4064	70.9581	0.361425	0.404637	0.376298	0.33994	0.0264799	0.387905	0.334945	22.046	17.7336	20.4979	24.3566	2.71611	19.3299	24.7621	-0.548508	1.2488	1.31171	1.38662	0.056336	-0.604844	-0.492172	8.27173	10.5242	9.10123	7.01636	1.44055	6.83118	9.71228	-1.04491	-0.929515	-0.999458	-1.12229	0.0796833	-1.12459	-0.965224
97.45	0.99656	2.81416	66.5505	67.9737	67.0936	66.0325	0.793651	65.7568	67.3441	0.298761	0.326835	0.309401	0.288694	0.0155899	0.314351	0.283171	16.8424	13.4885	15.3465	17.5404	1.65604	15.1863	18.4984	-0.693499	1.12996	1.18601	1.24404	0.0465727	-0.740072	-0.646926	16.6072	18.5377	17.5599	16.4271	0.862414	15.7448	17.4696	-0.700833	-0.6429	-0.671616	-0.706503	0.0260066	-0.72684	-0.674827
97.88	0.99259	4.10495	59.801	62.1913	60.6385	58.3823	1.56382	58.2372	61.3648	0.172493	0.216138	0.187677	0.147003	0.0283704	0.200863	0.144123	24.0086	20.2029	21.2941	25.969	2.50097	21.5076	26.5096	-0.500398	1.30541	1.32826	1.41446	0.0469537	-0.547352	-0.453444	16.1904	17.6058	18.0673	15.6486	1.04846	15.142	17.2389	-0.714036	-0.670241	-0.656563	-0.731615	0.0326373	-0.746673	-0.681398
98.31	0.99525	3.25015	61.1321	62.8945	61.8457	60.528	0.968185	60.164	62.1003	0.196679	0.229174	0.209766	0.185667	0.0177959	0.214475	0.178883	15.9899	13.2166	16.7217	13.1567	1.66661	14.3233	17.6565	-0.720484	1.12112	1.22328	1.11915	0.0486305	-0.769115	-0.671854	22.8779	23.889	21.4327	26.3153	1.99336	20.8845	24.8713	-0.527762	-0.503251	-0.564166	-0.447168	0.0477779	-0.57554	-0.479985
98.74	0.99708	2.60793	65.9537	68.1411	66.7097	65.0189	1.27611	64.6776	67.2299	0.28717	0.330178	0.301871	0.269205	0.0249131	0.312083	0.262257	20.3435	17.628	18.3311	20.7662	1.34463	18.9989	21.6881	-0.592796	1.2462	1.26319	1.31736	0.0303419	-0.623138	-0.562454	13.7028	14.231	14.9593	14.215	0.347147	13.3556	14.0499	-0.799189	-0.780096	-0.754717	-0.780665	0.0121001	-0.811289	-0.787089
99.17	0.99823	2.01613	60.7971	63.3083	61.9968	58.9943	1.80571	58.9914	62.6028	0.190565	0.236893	0.212549	0.157966	0.0330004	0.223565	0.157564	25.254	20.8168	24.3385	26.2536	2.25162	23.0024	27.5057	-0.471257	1.31841	1.38629	1.41919	0.0419591	-0.513216	-0.429298	13.9489	15.8749	13.6647	14.7521	0.902337	13.0465	14.8512	-0.790218	-0.724215	-0.800587	-0.76183	0.0311801	-0.821398	-0.759038
99.61	0.99738	2.47489	63.6431	66.1165	64.8283	61.9832	1.72684	61.9162	65.3699	0.243164	0.290321	0.265571	0.212298	0.0325544	0.275719	0.21061	24.9619	20.9732	23.0087	26.9087	2.46267	22.4992	27.4245	-0.478005	1.32166	1.36189	1.42989	0.044666	-0.522671	-0.433339	11.395	12.9103	12.163	11.1082	0.739303	10.6557	12.1343	-0.890742	-0.829029	-0.858636	-0.90322	0.0304935	-0.921236	-0.860249
100.04	0.99898	1.53773	57.6938	60.6429	59.3234	55.5321	2.16628	55.5275	59.8601	0.134725	0.187756	0.163881	0.0964969	0.0386419	0.173367	0.096083	33.721	29.7958	31.929	35.3481	2.2869	31.434	36.0079	-0.293476	1.47415	1.50418	1.54837	0.0304798	-0.323956	-0.262997	8.58526	9.5614	8.74769	9.11985	0.332598	8.25266	8.91786	-1.02726	-0.975832	-1.01835	-0.998481	0.0173703	-1.04463	-1.00989
100.47	0.99653	2.86516	66.9565	69.443	68.1617	65.4357	1.67104	65.2855	68.6276	0.306708	0.356517	0.330591	0.277186	0.033028	0.339736	0.27368	23.6125	19.9787	21.4261	25.2971	2.24513	21.3673	25.8576	-0.509881	1.30057	1.33094	1.40307	0.0429888	-0.55287	-0.466892	9.43097	10.5784	10.4122	9.26722	0.582873	8.8481	10.0138	-0.982423	-0.927025	-0.934706	-0.990815	0.0284339	-1.01086	-0.953989
100.9	0.99719	2.61057	56.7232	60.0924	58.6383	54.289	2.46555	54.2576	59.1887	0.117505	0.177764	0.151583	0.0746915	0.043744	0.161249	0.0737614	40.2565	36.7648	38.0609	42.4819	2.44747	37.8091	42.704	-0.171454	1.56543	1.58048	1.6282	0.026759	-0.198213	-0.144695	3.02029	3.1428	3.30079	3.22908	0.0645905	2.9557	3.08488	-1.50663	-1.48882	-1.46681	-1.47667	0.00900177	-1.51563	-1.49763
101.33	0.99825	2.04783	59.3283	63.2555	60.8093	56.7451	2.6851	56.6432	62.0134	0.16397	0.235906	0.190786	0.117893	0.0486217	0.212592	0.115348	35.7515	32.5701	33.1064	37.5727	2.24258	33.5089	37.9941	-0.254569	1.51282	1.51991	1.57487	0.0277323	-0.282301	-0.226837	4.92019	4.17439	6.08435	5.68219	0.822134	4.09806	5.74232	-1.28611	-1.36089	-1.18852	-1.22008	0.0749318	-1.36104	-1.21117
101.77	0.99824	2.04392	62.4623	65.8929	63.7299	60.2107	2.34167	60.1206	64.8039	0.22115	0.285995	0.244794	0.179908	0.0436681	0.264818	0.177482	28.9596	25.736	26.591	30.5054	2.07633	26.8832	31.0359	-0.389713	1.41054	1.42474	1.48438	0.0319901	-0.421703	-0.357723	8.57816	8.37108	9.67907	9.2839	0.547747	8.03041	9.12591	-1.02766	-1.03925	-0.969955	-0.989954	0.0291207	-1.05678	-0.998535
102.2	0.99858	1.80775	63.033	65.3488	63.6089	62.1134	1.3221	61.7109	64.3551	0.231754	0.27552	0.242522	0.2147	0.0248595	0.256613	0.206894	21.8816	19.5493	19.8909	22.0512	1.10771	20.7739	22.9893	-0.552675	1.29113	1.29865	1.34343	0.023087	-0.575762	-0.529588	15.0854	15.1019	16.5002	15.8354	0.571099	14.5143	15.6565	-0.750425	-0.749866	-0.704195	-0.725501	0.0186592	-0.769084	-0.731765
102.63	0.98979	4.75397	59.9986	61.6591	60.1249	59.7067	0.839341	59.1593	60.838	0.176066	0.206335	0.178353	0.17079	0.0152883	0.191354	0.160778	17.2024	14.852	15.8051	16.4247	0.646857	16.5555	17.8492	-0.682429	1.17179	1.1988	1.2155	0.0180106	-0.70044	-0.664418	22.799	23.4889	24.0699	23.8686	0.240906	22.5581	23.0399	-0.529707	-0.512862	-0.498938	-0.503738	0.00577484	-0.535482	-0.523932
103.06	0.99709	2.60116	67.2795	69.2138	68.1514	66.0794	1.30158	65.9779	68.5811	0.313063	0.351837	0.330385	0.289602	0.0258128	0.338875	0.28725	18.7461	15.0135	17.4228	19.8961	1.99338	16.7528	20.7395	-0.636932	1.17648	1.24112	1.29877	0.0499504	-0.686883	-0.586982	13.9744	15.7727	14.4258	14.0245	0.747675	13.2267	14.722	-0.789296	-0.727548	-0.773203	-0.787487	0.0255628	-0.814858	-0.763733
103.49	0.9967	2.73305	62.1391	64.0592	62.4703	61.4323	1.08027	61.0588	63.2194	0.215174	0.250994	0.221299	0.202172	0.0200864	0.235261	0.195088	19.7877	16.8751	17.2903	20.9134	1.81375	17.9739	21.6014	-0.607847	1.22725	1.2378	1.32042	0.0416601	-0.649507	-0.566187	18.0732	19.0657	20.2394	17.6544	1.05683	17.0164	19.13	-0.656391	-0.627879	-0.59559	-0.668788	0.029952	-0.686343	-0.626439
103.93	0.99513	3.29824	58.7096	60.3837	59.2596	57.8878	1.0206	57.689	59.7302	0.152859	0.183045	0.162733	0.138179	0.0183437	0.171203	0.134516	21.6434	17.2128	20.2037	22.9712	2.35143	19.292	23.9949	-0.55875	1.23585	1.30543	1.36118	0.0512701	-0.61002	-0.507479	19.647	22.4036	20.5368	19.1411	1.33653	18.3105	20.9835	-0.611706	-0.539525	-0.587634	-0.625762	0.0352847	-0.646991	-0.576421
104.36	0.99791	2.14617	52.7647	54.3972	53.3047	52.0382	0.963938	51.8007	53.7286	0.0480759	0.0765854	0.0574915	0.0354268	0.0168175	0.0648934	0.0312584	26.2018	23.8876	23.6432	26.6566	1.36659	24.8352	27.5684	-0.449715	1.37817	1.37371	1.4258	0.0235778	-0.473293	-0.426138	21.0336	21.7152	23.0522	21.3052	0.745929	20.2877	21.7795	-0.574529	-0.556913	-0.523484	-0.567461	0.0187461	-0.593275	-0.555783
104.79	0.9388	11.1639	39.1152	40.0463	39.0246	39.3036	0.431173	38.684	39.5464	-0.192164	-0.175254	-0.193816	-0.188732	0.00783173	-0.184332	-0.199995	26.9005	22.8535	25.1017	26.8182	1.62344	25.277	28.5239	-0.434154	1.35895	1.3997	1.42843	0.0285053	-0.46266	-0.405649	33.9843	37.1002	35.8737	33.8782	1.32782	32.6565	35.3122	-0.288368	-0.229272	-0.25226	-0.290425	0.0252202	-0.313589	-0.263148
105.22	0.98357	5.84406	43.6974	44.6187	44.3142	43.7071	0.378904	43.3184	44.0763	-0.110074	-0.0938471	-0.0992017	-0.109901	0.00667407	-0.1034	-0.116748	26.6762	23.0784	26.0064	25.6066	1.29634	25.3799	27.9726	-0.43912	1.36321	1.41508	1.40835	0.0230322	-0.462153	-0.416088	29.6264	32.3029	29.6794	30.6863	1.08065	28.5458	30.7071	-0.37573	-0.321328	-0.374628	-0.353875	0.0219363	-0.397667	-0.353794
105.65	0.97607	7.04316	44.3349	45.3966	44.5509	44.2391	0.489018	43.8459	44.8239	-0.0988374	-0.0801965	-0.0950375	-0.100524	0.00858657	-0.0902509	-0.107424	25.4304	22.0984	23.6091	25.119	1.23316	24.1973	26.6636	-0.467208	1.34436	1.37308	1.4	0.0227196	-0.489928	-0.444489	30.2347	32.505	31.8399	30.642	0.770904	29.4638	31.0056	-0.363134	-0.317321	-0.330558	-0.35478	0.0155106	-0.378644	-0.347623
106.08	0.99655	2.78417	57.446	59.5475	58.3344	56.3091	1.33587	56.1102	58.7819	0.13032	0.167919	0.146146	0.110188	0.0238046	0.154125	0.106515	24.1456	21.2749	22.7546	24.0332	1.12707	23.0186	25.2727	-0.497142	1.32787	1.35707	1.38081	0.0216527	-0.518795	-0.475489	18.4083	19.1776	18.9111	19.6577	0.30895	18.0994	18.7173	-0.646631	-0.624738	-0.632245	-0.611411	0.00861553	-0.655247	-0.638016
106.52	0.94392	10.814	47.5034	47.5618	47.7659	48.6789	0.485673	47.0178	47.9891	-0.043406	-0.042389	-0.0388353	-0.0229555	0.00844888	-0.0349571	-0.0518548	20.3843	18.6226	18.8767	17.7949	0.461889	19.9224	20.8462	-0.591702	1.27004	1.27593	1.2503	0.010962	-0.602664	-0.58074	32.1122	33.8156	33.3573	33.5262	0.189216	31.923	32.3015	-0.325121	-0.29164	-0.300561	-0.297266	0.00368356	-0.328804	-0.321437
106.95	0.97929	6.54404	46.7965	46.9253	46.7692	48.3385	0.705876	46.0907	47.5024	-0.0557263	-0.0534803	-0.0562039	-0.0288738	0.012292	-0.0434344	-0.0680183	21.1988	21.3515	19.9375	17.0449	1.79237	19.4064	22.9912	-0.570222	1.32943	1.29967	1.23159	0.040949	-0.611171	-0.529273	32.0047	31.7232	33.2933	34.6166	1.18267	30.822	33.1873	-0.327266	-0.332896	-0.301812	-0.276183	0.0231889	-0.350455	-0.304077
107.38	0.99348	3.74654	49.0657	49.8018	49.6935	49.623	0.0735591	48.9922	49.1393	-0.016232	-0.00344293	-0.00532434	-0.00655015	0.0012779	-0.0149541	-0.0175099	27.7464	26.7012	26.2861	25.7482	0.390148	27.3562	28.1365	-0.415654	1.42653	1.41973	1.41075	0.00646431	-0.422118	-0.409189	23.1879	23.497	24.0204	24.6289	0.462527	22.7254	23.6504	-0.520168	-0.512666	-0.500116	-0.48576	0.0109926	-0.53116	-0.509175
107.81	0.85519	17.0899	49.0892	47.9015	47.7927	51.3018	1.62916	47.4601	50.7184	-0.0158231	-0.0364765	-0.0383695	0.0226195	0.0283149	0.0124918	-0.044138	4.44674	0	3.01438	3.92477	1.67727	2.76947	6.12401	-1.3322	#NUM!	0.479198	0.593814	#NUM!	#NUM!	#NUM!	46.464	52.0985	49.1929	44.7734	3.01166	43.4523	49.4757	-0.0615292	0.0364765	-0.014022	-0.0911275	0.0524702	-0.113999	-0.00905891
109.34	0.99052	4.55111	57.6231	58.0637	57.6715	58.5013	0.338946	57.2842	57.9621	0.133468	0.141314	0.134328	0.149132	0.00604655	0.139515	0.127422	15.9006	15.7267	13.4409	13.8253	0.999336	14.9013	16.9	-0.723378	1.19664	1.12843	1.14067	0.0296918	-0.75307	-0.693687	26.4762	26.2096	28.8876	27.6734	1.09486	25.3814	27.5711	-0.443572	-0.449539	-0.391234	-0.417236	0.0238493	-0.467421	-0.419722
111.04	0.99034	4.71575	56.7486	59.023	58.1431	55.8444	1.34005	55.4085	58.0887	0.117955	0.15848	0.142731	0.101993	0.023801	0.141756	0.094154	32.1019	30.4034	30.5455	30.9102	0.21342	31.8885	32.3153	-0.325327	1.48292	1.48495	1.4901	0.00302206	-0.328349	-0.322305	11.1495	10.5736	11.3114	13.2455	1.12664	10.0229	12.2761	-0.901404	-0.927243	-0.89435	-0.816225	0.0465601	-0.947965	-0.854844
111.62	0.98641	5.44272	37.7654	40.4503	39.2556	36.3259	1.73271	36.0327	39.4981	-0.216938	-0.167958	-0.189605	-0.243745	0.0318741	-0.185064	-0.248812	45.1386	41.8225	44.0581	44.5183	1.17742	43.9612	46.3161	-0.0847179	1.62141	1.64403	1.64854	0.0118687	-0.0965866	-0.0728493	17.0959	17.7272	16.6863	19.1557	1.01226	16.0837	18.1082	-0.685683	-0.666618	-0.698356	-0.625351	0.0298886	-0.715571	-0.655794
112.76	0.98526	5.63809	30.9574	34.2499	31.8579	30.0272	1.72898	29.2284	32.6863	-0.348353	-0.283238	-0.330199	-0.367415	0.0344419	-0.313911	-0.382795	50.2916	50.6183	47.7483	47.4783	1.42084	48.8707	51.7124	0.0050648	1.70431	1.67896	1.67649	0.0125706	-0.00750581	0.0176354	18.7511	15.1319	20.3939	22.4946	3.09678	15.6543	21.8479	-0.636791	-0.748852	-0.591447	-0.537255	0.0897442	-0.726536	-0.547047
113.9	0.98881	4.87215	27.3894	30.2119	28.2037	26.8166	1.39383	25.9956	28.7832	-0.423418	-0.363604	-0.405795	-0.436009	0.0296939	-0.393724	-0.453111	50.7336	50.869	49.0889	47.4024	1.41541	49.3182	52.149	0.012745	1.70645	1.69098	1.6758	0.0125142	0.000230859	0.0252592	21.877	18.9191	22.7074	25.781	2.80641	19.0706	24.6834	-0.552791	-0.632017	-0.531971	-0.459215	0.0708389	-0.62363	-0.481952
115.04	0.99555	3.15632	35.9135	39.2509	37.8825	34.0017	2.2233	33.6902	38.1368	-0.251508	-0.189691	-0.214775	-0.288033	0.0417227	-0.209785	-0.293231	52.5481	51.8296	50.8868	50.9613	0.427972	52.1201	52.976	0.0443027	1.71458	1.7066	1.70724	0.00361801	0.0406847	0.0479207	11.5384	8.91951	11.2307	15.037	2.52221	9.0162	14.0606	-0.884609	-1.00908	-0.897856	-0.752068	0.105242	-0.989851	-0.779366
116.18	0.99049	4.57468	40.782	44.032	42.0605	39.1935	1.98655	38.7954	42.7685	-0.161986	-0.104171	-0.1391	-0.190735	0.0355585	-0.126427	-0.197544	43.8396	42.4983	42.4063	42.1792	0.13411	43.7055	43.9737	-0.107564	1.62837	1.62743	1.6251	0.00137593	-0.10894	-0.106188	15.3785	13.4696	15.5332	18.6273	2.11955	13.2589	17.498	-0.740568	-0.807813	-0.735426	-0.64033	0.0685837	-0.809151	-0.671984
117.32	0.99299	3.86837	33.8127	36.0297	34.5725	33.3359	1.10096	32.7117	34.9136	-0.291695	-0.249318	-0.277029	-0.30098	0.0211095	-0.270586	-0.312805	45.6328	42.0969	45.9255	44.036	1.56308	44.0697	47.1959	-0.0760602	1.62425	1.66205	1.64381	0.0154365	-0.0914967	-0.0606237	20.5545	21.8734	19.502	22.6281	1.33193	19.2226	21.8865	-0.587162	-0.552881	-0.615706	-0.533934	0.0349487	-0.62211	-0.552213
118.47	0.99605	2.99126	47.0872	49.832	48.4589	45.6682	1.7324	45.3548	48.8196	-0.0506572	-0.00291847	-0.0267803	-0.0754405	0.0301785	-0.0204787	-0.0808356	41.9387	38.3593	41.0353	42.2503	1.6254	40.3133	43.5641	-0.141272	1.58387	1.61316	1.62583	0.0175718	-0.158844	-0.123701	10.9741	11.8087	10.5058	12.0815	0.687548	10.2865	11.6616	-0.909148	-0.873224	-0.930364	-0.861961	0.0299462	-0.939094	-0.879202
119.61	0.99533	3.20822	26.6142	30.4379	28.6844	24.2857	2.58784	24.0263	29.202	-0.440499	-0.358959	-0.395538	-0.493827	0.0569485	-0.383551	-0.497448	60.8411	59.4468	58.2721	60.4455	0.888266	59.9528	61.7293	0.191366	1.77413	1.76546	1.78136	0.00650134	0.184864	0.197867	12.5448	10.1153	13.0435	15.2688	2.11042	10.4344	14.6552	-0.843323	-0.948707	-0.823909	-0.744239	0.084149	-0.927472	-0.759174
120.75	0.9947	3.39959	37.4183	40.5772	38.9306	35.8023	1.98042	35.4379	39.3988	-0.223363	-0.16567	-0.195533	-0.253609	0.0365118	-0.186851	-0.259874	46.2717	44.3117	45.3258	44.6258	0.423882	45.8478	46.6956	-0.0648875	1.64652	1.65635	1.64959	0.0041052	-0.0689927	-0.0607823	16.31	15.1111	15.7437	19.5719	1.97076	14.3392	18.2807	-0.710221	-0.749555	-0.728497	-0.613774	0.0596672	-0.769888	-0.650554
121.89	0.99342	3.69505	18.3854	21.1345	19.1469	17.4892	1.4902	16.8952	19.8756	-0.647295	-0.571896	-0.625599	-0.67374	0.0415986	-0.605696	-0.688894	54.413	51.2853	53.6573	52.557	0.96921	53.4438	55.3822	0.0768613	1.70999	1.72963	1.72063	0.00802565	0.0688357	0.084887	27.2016	27.5802	27.1958	29.9538	1.21968	25.9819	28.4213	-0.427527	-0.41926	-0.427655	-0.368932	0.0259309	-0.453458	-0.401596
123.03	0.99203	4.02656	18.4863	20.5162	18.9835	18.9198	0.737997	17.7483	19.2243	-0.64438	-0.588181	-0.630196	-0.631999	0.0202442	-0.624136	-0.664624	50.3573	51.1909	49.6157	44.7344	2.74861	47.6087	53.106	0.00620791	1.70919	1.69562	1.65064	0.0250231	-0.0188152	0.031231	31.1563	28.2929	31.4008	36.3458	3.31598	27.8404	34.4723	-0.344318	-0.403885	-0.339379	-0.243373	0.065948	-0.410266	-0.27837
124.17	0.98978	4.69326	32.2171	35.241	33.4805	31.1476	1.67657	30.5405	33.8937	-0.323034	-0.264252	-0.298156	-0.344494	0.0328898	-0.290144	-0.355924	49.7234	49.8562	47.2654	47.2553	1.2237	48.4997	50.9471	-0.00480456	1.69772	1.67454	1.67445	0.0109471	-0.0157516	0.00614251	18.0595	14.9028	19.254	21.5971	2.77362	15.2858	20.8331	-0.656794	-0.756648	-0.622599	-0.559937	0.0820506	-0.738844	-0.574743
125.32	0.98367	5.95171	31.4441	34.3044	32.8069	30.3435	1.63298	29.8111	33.077	-0.338507	-0.282187	-0.31136	-0.360897	0.0324895	-0.306017	-0.370996	51.4819	50.2512	49.9897	49.6966	0.226561	51.2553	51.7085	0.0257508	1.70115	1.69888	1.69633	0.00196904	0.0237817	0.0277198	17.074	15.4444	17.2034	19.9599	1.8584	15.2157	18.9324	-0.686354	-0.738371	-0.682397	-0.603148	0.0554766	-0.741831	-0.630877
126.46	0.99116	4.29038	8.93237	9.94489	8.72673	10.3131	0.677904	8.25447	9.61027	-1.0084	-0.956908	-1.01949	-0.939341	0.0343989	-0.973998	-1.0428	48.7812	49.588	47.764	42.7437	2.89396	45.8872	51.6751	-0.0211776	1.69538	1.6791	1.63087	0.0273897	-0.0485673	0.00621209	42.2865	40.4671	43.5093	46.9432	2.64548	39.641	44.932	-0.135076	-0.167655	-0.113395	-0.0531678	0.0467604	-0.181837	-0.0883158
127.6	0.98457	5.77179	14.1578	16.7147	15.1531	13.6988	1.23151	12.9262	15.3893	-0.782707	-0.69747	-0.748134	-0.799336	0.0415867	-0.74112	-0.824294	58.3037	58.8427	56.6942	54.2148	1.89093	56.4128	60.1946	0.145599	1.76969	1.75354	1.73412	0.0145436	0.131055	0.160142	27.5386	24.4426	28.1527	32.0864	3.12101	24.4175	30.6596	-0.420166	-0.490129	-0.40689	-0.325636	0.0671558	-0.487322	-0.35301
128.74	0.99092	4.27318	17.8462	19.6342	18.4238	17.8556	0.741737	17.1044	18.5879	-0.663083	-0.612057	-0.646184	-0.662804	0.0211242	-0.641959	-0.684207	48.6965	50.6525	45.6372	44.5659	2.65301	46.0435	51.3495	-0.0226498	1.7046	1.65932	1.649	0.0241475	-0.0467972	0.00149771	33.4574	29.7133	35.939	37.5785	3.38801	30.0694	36.8454	-0.298608	-0.373922	-0.251028	-0.220395	0.0663423	-0.36495	-0.232266
129.88	0.97897	6.65677	13.3619	14.6992	13.9433	14.0386	0.336133	13.0257	13.698	-0.811842	-0.763659	-0.790419	-0.786979	0.0118873	-0.799955	-0.823729	52.516	53.9864	51.3327	46.8541	2.94332	49.5727	55.4594	0.0437452	1.73228	1.71039	1.67075	0.0254683	0.0182769	0.0692135	34.1221	31.3144	34.7241	39.1072	3.18967	30.9324	37.3118	-0.285704	-0.341122	-0.274123	-0.192309	0.0608529	-0.346557	-0.224851
132.17	0.98952	4.63474	10.0497	11.078	10.4477	10.8487	0.260462	9.78929	10.3102	-0.951847	-0.904548	-0.933055	-0.914752	0.0117932	-0.940054	-0.96364	49.8621	51.5787	47.3513	44.8188	2.78849	47.0736	52.6506	-0.00239627	1.71247	1.67533	1.65146	0.0251029	-0.0274992	0.0227067	40.0882	37.3433	42.2009	44.3326	2.9248	37.1634	43.013	-0.174496	-0.224755	-0.136598	-0.0988783	0.0527459	-0.227242	-0.12175
133.31	0.95592	9.45044	0	0	0	0	0	0	0	#NUM!	#NUM!	#NUM!	#NUM!	#NUM!	#NUM!	#NUM!	49.3377	53.6885	47.8705	42.6983	4.48929	44.8485	53.827	-0.0115051	1.72988	1.68007	1.63041	0.0406085	-0.0521137	0.0291034	50.6623	46.3115	52.1295	57.3017	4.48929	46.173	55.1515	0.0115051	-0.0641921	0.0370163	0.127756	0.0784014	-0.0668963	0.0899065
134.45	0.98398	5.8907	9.13643	11.1137	9.85544	9.01915	0.860857	8.27557	9.99729	-0.997613	-0.902977	-0.961264	-1.00378	0.041322	-0.956291	-1.03894	58.7149	58.3327	58.2479	54.4146	1.82734	56.8875	60.5422	0.152955	1.76591	1.76528	1.73572	0.0140882	0.138867	0.167043	32.1487	30.5536	31.8967	36.5662	2.57683	29.5718	34.7255	-0.324395	-0.356588	-0.329423	-0.23924	0.0501567	-0.374552	-0.274238
136.16	0.98756	5.22491	8.28037	10.5334	9.34825	8.14968	0.973138	7.30723	9.25351	-1.04441	-0.929094	-0.986646	-1.05194	0.0501848	-0.994228	-1.0946	61.6579	62.986	60.2268	56.4691	2.6709	58.987	64.3288	0.206312	1.79924	1.77979	1.75181	0.0194684	0.186844	0.225781	30.0618	26.4806	30.425	35.3812	3.64146	26.4203	33.7032	-0.3667	-0.443474	-0.359223	-0.261586	0.0743222	-0.441022	-0.292378
137.87	0.97284	7.72691	5.16548	6.34438	5.08375	6.4175	0.612229	4.55325	5.77771	-1.26386	-1.16914	-1.27116	-1.16383	0.0493895	-1.21447	-1.31325	57.2103	57.5209	58.0522	50.9192	3.24455	53.9658	60.4549	0.126135	1.75983	1.76382	1.70688	0.0259504	0.100185	0.152086	37.6242	36.1347	36.8641	42.6633	2.9209	34.7033	40.5451	-0.219549	-0.24734	-0.233673	-0.128378	0.0531514	-0.2727	-0.166397
139.02	0.98397	5.89194	6.47968	8.30234	7.11309	6.49936	0.748459	5.73122	7.22814	-1.15935	-1.04316	-1.1159	-1.15794	0.0474163	-1.11194	-1.20677	57.8549	58.6911	55.2636	54.134	1.93767	55.9172	59.7926	0.137593	1.76857	1.74244	1.73347	0.0148905	0.122702	0.152483	35.6654	33.0065	37.6233	39.3666	2.68337	32.9821	38.3488	-0.256197	-0.307433	-0.219565	-0.187584	0.0506702	-0.306867	-0.205527
141.3	0.99278	3.85076	1.76502	2.18374	1.70833	3.25724	0.647863	1.11716	2.41288	-1.74552	-1.65121	-1.75994	-1.47277	0.118385	-1.62713	-1.8639	49.6075	51.4318	47.9783	42.9903	3.46515	46.1424	53.0727	-0.00681787	1.71123	1.68105	1.63337	0.0320528	-0.0388707	0.025235	48.6274	46.3845	50.3133	53.7524	3.01018	45.6173	51.6376	-0.0238498	-0.0629184	0.005443	0.0653094	0.052387	-0.0762368	0.0285372
143.58	0.98456	5.74608	7.41276	8.62348	7.97996	7.90155	0.323428	7.08933	7.73619	-1.09657	-1.02515	-1.06188	-1.06654	0.0185105	-1.07806	-1.11508	53.8714	55.2224	51.3422	49.3421	2.44116	51.4302	56.3126	0.0673882	1.74212	1.71047	1.69322	0.0202481	0.0471401	0.0876362	38.7158	36.1541	40.6779	42.7563	2.75626	35.9596	41.4721	-0.19946	-0.246975	-0.163858	-0.126728	0.050273	-0.249733	-0.149187
145.87	0.98727	5.25839	5.73928	7.80965	6.2814	6.03187	0.785869	4.95341	6.52515	-1.21547	-1.07205	-1.17377	-1.19253	0.0529277	-1.16255	-1.2684	59.9723	60.5031	59.6923	54.1185	2.83799	57.1343	62.8103	0.17559	1.78178	1.77592	1.73335	0.0215829	0.154007	0.197172	34.2884	31.6872	34.0263	39.8496	3.43199	30.8565	37.7204	-0.282494	-0.333618	-0.287556	-0.178815	0.0649021	-0.347396	-0.217592
148.15	0.98942	4.83632	11.0891	13.9614	12.5218	10.2428	1.53097	9.5581	12.62	-0.90406	-0.789764	-0.844231	-0.942652	0.0632701	-0.84079	-0.96733	64.8593	66.1725	62.8147	60.6223	2.28243	62.5769	67.1417	0.266161	1.82068	1.79806	1.78263	0.0156238	0.250538	0.281785	24.0517	19.8661	24.6634	29.1349	3.78474	20.2669	27.8364	-0.499373	-0.605704	-0.484952	-0.38602	0.0898331	-0.589206	-0.40954
150.43	0.98066	6.24648	20.5266	22.6702	21.1743	20.4293	0.931837	19.5947	21.4584	-0.587906	-0.532891	-0.570859	-0.5905	0.0239126	-0.563993	-0.611818	46.9375	48.4543	44.5582	42.0402	2.63858	44.2989	49.5761	-0.0532679	1.68533	1.64893	1.62367	0.025312	-0.0785799	-0.027956	32.5359	28.8755	34.2675	37.5305	3.56885	28.9671	36.1048	-0.316709	-0.39149	-0.282897	-0.221283	0.070363	-0.387072	-0.246346
152.72	0.99589	3.04497	11.2571	14.218	12.7658	10.4563	1.54895	9.70813	12.806	-0.896708	-0.780558	-0.83464	-0.932658	0.0629523	-0.833756	-0.95966	65.7147	68.1644	63.3447	61.047	2.96583	62.7488	68.6805	0.282554	1.83356	1.80171	1.78566	0.0199038	0.26265	0.302458	23.0283	17.6176	23.8895	28.4967	4.45866	18.5696	27.4869	-0.52407	-0.669886	-0.503238	-0.399531	0.111365	-0.635435	-0.412705
155	0.98347	6.09329	6.31375	8.97494	7.58154	5.75892	1.31683	4.99692	7.63058	-1.17139	-1.00613	-1.086	-1.2139	0.0855737	-1.08581	-1.25696	67.0445	67.5448	66.0398	62.3914	2.16368	64.8808	69.2082	0.308436	1.82959	1.81981	1.79512	0.0145026	0.293933	0.322938	26.6417	23.4802	26.3787	31.8497	3.47021	23.1715	30.1119	-0.439887	-0.513072	-0.445751	-0.330363	0.0754461	-0.515333	-0.364441
158.42	0.99582	2.98003	6.1794	9.41319	7.58996	4.9901	1.81497	4.36443	7.99437	-1.18135	-0.983328	-1.08548	-1.27966	0.122906	-1.05845	-1.30426	68.1647	68.0108	66.7011	64.4566	1.46764	66.6971	69.6324	0.330651	1.83258	1.82413	1.80927	0.00963616	0.321015	0.340287	25.6559	22.576	25.7089	30.5533	3.28162	22.3742	28.9375	-0.46206	-0.535228	-0.460853	-0.356593	0.073267	-0.535327	-0.388793
160.71	0.99038	4.60528	13.8487	17.1388	15.7407	12.2248	2.06727	11.7814	15.916	-0.793853	-0.684372	-0.728593	-0.856128	0.0728171	-0.721036	-0.86667	67.6033	66.6474	66.2113	65.2823	0.56926	67.034	68.1725	0.319466	1.82378	1.82093	1.8148	0.00374993	0.315716	0.323216	18.548	16.2138	18.048	22.4928	2.6362	15.9118	21.1842	-0.642604	-0.713287	-0.657131	-0.537299	0.0733979	-0.716001	-0.569206
162.42	0.97921	6.67434	7.55027	8.68073	8.06479	8.13287	0.275715	7.27456	7.82598	-1.08794	-1.02201	-1.05689	-1.05292	0.0155921	-1.07235	-1.10354	55.3114	55.7432	54.5536	50.5752	2.20985	53.1016	57.5213	0.0926184	1.74619	1.73682	1.70394	0.0181189	0.0744995	0.110737	37.1383	35.5761	37.3816	41.2919	2.38564	34.7527	39.5239	-0.228564	-0.257889	-0.224044	-0.152832	0.0437841	-0.272348	-0.18478
163.56	0.99466	3.46695	8.8013	13.1857	10.9479	6.26764	2.88237	5.91893	11.6837	-1.01544	-0.818487	-0.910316	-1.17479	0.151043	-0.864399	-1.16648	74.3885	74.525	71.8041	71.9474	1.25027	73.1383	75.6388	0.463072	1.8723	1.85615	1.85701	0.00741903	0.455653	0.470491	16.8102	12.2892	17.2481	21.785	3.8779	12.9322	20.6881	-0.694499	-0.853528	-0.681037	-0.555133	0.122313	-0.816812	-0.572185
165	0.99424	3.50938	28.1831	30.3364	29.6709	27.8215	1.06395	27.1192	29.2471	-0.406237	-0.361042	-0.374805	-0.414028	0.0224483	-0.383789	-0.428685	52.6275	53.0882	51.1412	48.9677	1.68303	50.9445	54.3106	0.0456873	1.725	1.70877	1.68991	0.0143382	0.0313492	0.0600255	19.1893	16.5754	19.1879	23.2108	2.72922	16.4601	21.9185	-0.62441	-0.70183	-0.624449	-0.51961	0.0746721	-0.699082	-0.549738
166.41	0.99585	3.04837	14.1776	17.7229	16.2455	12.0941	2.3828	11.7948	16.5604	-0.781998	-0.666744	-0.712274	-0.861443	0.0831543	-0.698844	-0.865153	70.1658	68.3439	68.9369	68.9815	0.29064	69.8752	70.4565	0.371411	1.8347	1.83845	1.83873	0.00183858	0.369573	0.37325	15.6566	13.9332	14.8175	18.9243	2.17459	13.482	17.8312	-0.731354	-0.790785	-0.759574	-0.63187	0.068748	-0.800102	-0.662606
168.7	0.99613	2.93093	18.1933	21.8805	20.0745	15.9332	2.48959	15.7037	20.6829	-0.652877	-0.552701	-0.600041	-0.722321	0.0714642	-0.581413	-0.724341	66.8173	64.2198	65.7926	66.1808	0.847843	65.9694	67.6651	0.303976	1.80767	1.81818	1.82073	0.00565268	0.298324	0.309629	14.9894	13.8996	14.1329	17.886	1.8267	13.1627	16.8161	-0.753688	-0.792003	-0.783595	-0.661904	0.0594466	-0.813135	-0.694242
170.98	0.99766	2.3005	16.9143	21.5426	19.6086	13.608	3.37814	13.5362	20.2924	-0.691273	-0.561335	-0.612763	-0.80268	0.103795	-0.587478	-0.795067	73.6587	70.8309	71.1528	74.4137	1.6184	72.0403	75.2771	0.446587	1.85022	1.85219	1.87165	0.00967149	0.436916	0.456259	9.42701	7.62648	9.23858	11.9783	1.79641	7.6306	11.2234	-0.982625	-1.08322	-0.992296	-0.866193	0.0889892	-1.07161	-0.893636
172.69	0.99633	2.884	10.9815	14.6278	13.0249	9.1041	2.32028	8.66117	13.3017	-0.908821	-0.766137	-0.824622	-0.999307	0.0990531	-0.809768	-1.00787	71.1865	70.7146	69.6785	68.3837	0.953532	70.233	72.14	0.392802	1.84951	1.8431	1.83495	0.0059567	0.386845	0.398758	17.832	14.6576	17.2966	22.5122	3.26362	14.5684	21.0957	-0.663501	-0.765103	-0.679561	-0.536816	0.094168	-0.757669	-0.569333
173.84	0.99311	3.96245	3.52549	7.1029	5.06339	1.96961	2.11034	1.41515	5.63583	-1.43719	-1.11657	-1.27299	-1.69698	0.245202	-1.19199	-1.68239	71.9394	71.5807	70.6185	68.4362	1.31557	70.6239	73.255	0.408871	1.8548	1.84892	1.83529	0.00817208	0.400699	0.417043	24.5351	21.3164	24.3181	29.5942	3.42166	21.1134	27.9567	-0.487958	-0.567171	-0.493062	-0.376402	0.0785243	-0.566482	-0.409434
175.55	0.99387	3.74831	7.82161	11.7678	9.98722	5.81649	2.49408	5.32753	10.3157	-1.07133	-0.874931	-0.95486	-1.20931	0.142575	-0.928758	-1.21391	74.1485	74.3949	72.3956	70.8206	1.46262	72.6859	75.6111	0.457617	1.87154	1.85971	1.85016	0.00874625	0.448871	0.466364	18.0299	13.8373	17.6171	23.3629	3.91633	14.1135	21.9462	-0.657663	-0.794269	-0.669901	-0.515913	0.113853	-0.771516	-0.54381
177.26	0.98682	5.49818	0	2.04663	0.85308	0	0.839378	-0.839378	0.839378	#NUM!	-1.67998	-2.06529	#NUM!	#NUM!	#NUM!	#NUM!	67.4796	69.6842	65.4317	62.1743	3.07484	64.4048	70.5544	0.317017	1.84313	1.81579	1.79361	0.0202544	0.296762	0.337271	32.5204	28.2692	33.7153	37.8257	3.91409	28.6063	36.4345	-0.317017	-0.404392	-0.293587	-0.215824	0.0773754	-0.394392	-0.239641
179.54	0.97277	7.47292	0	0	0	0	0	0	0	#NUM!	#NUM!	#NUM!	#NUM!	#NUM!	#NUM!	#NUM!	56.9392	60.3487	56.679	50.3904	4.11207	52.8271	61.0513	0.121329	1.78067	1.75342	1.70235	0.0324637	0.0888656	0.153793	43.0608	39.6513	43.321	49.6096	4.11207	38.9487	47.1729	-0.121329	-0.182411	-0.116723	-0.00678208	0.072455	-0.193784	-0.0488743
181.26	0.99574	3.12207	4.2159	7.96338	6.22135	2.39457	2.32595	1.88995	6.54185	-1.3564	-1.06286	-1.17822	-1.61025	0.235604	-1.1208	-1.59201	74.45	75.9257	72.0226	70.5606	2.26461	72.1854	76.7146	0.464473	1.88039	1.85747	1.84856	0.0134064	0.451066	0.477879	21.3341	16.1109	21.7561	27.0448	4.46454	16.8696	25.7987	-0.566711	-0.716586	-0.55587	-0.430972	0.116906	-0.683618	-0.449805
183.54	0.99211	4.25641	4.83987	8.50255	6.46325	3.35017	2.11862	2.72125	6.95849	-1.29362	-1.03186	-1.16053	-1.46013	0.179424	-1.1142	-1.47305	72.1698	72.7658	70.2348	68.2854	1.83426	70.3356	74.0041	0.41384	1.86193	1.84655	1.83433	0.011292	0.402548	0.425132	22.9903	18.7316	23.302	28.3645	3.93429	19.056	26.9246	-0.525	-0.637346	-0.517391	-0.402354	0.0959419	-0.620942	-0.429058
185.25	0.98609	5.36128	0	0	0	0.2696	0.127091	-0.127091	0.127091	#NUM!	#NUM!	#NUM!	-2.56811	#NUM!	#NUM!	#NUM!	48.6371	50.5183	48.3037	42.5176	3.37301	45.2641	52.0102	-0.0236812	1.70345	1.68398	1.62857	0.0317219	-0.0554031	0.00804077	51.3629	49.4817	51.6963	57.2128	3.25075	48.1121	54.6136	0.0236812	-0.00900359	0.0294792	0.12618	0.0568688	-0.0331876	0.0805499
186.96	0.984	6.15761	0	0	0	0	0	0	0	#NUM!	#NUM!	#NUM!	#NUM!	#NUM!	#NUM!	#NUM!	58.3563	60.8774	58.2705	52.936	3.30518	55.0511	61.6614	0.146538	1.78446	1.76545	1.72375	0.0253531	0.121185	0.171891	41.6437	39.1226	41.7295	47.064	3.30518	38.3386	44.9489	-0.146538	-0.192028	-0.145005	-0.0510625	0.058602	-0.20514	-0.0879357
189.25	0.99486	3.26273	2.00443	3.05352	2.06598	2.75917	0.413977	1.59045	2.41841	-1.68922	-1.50173	-1.67581	-1.54707	0.0737348	-1.61548	-1.76295	50.2849	50.4777	48.3986	45.2866	2.1332	48.1517	52.4181	0.00494858	1.7031	1.68483	1.65597	0.0194021	-0.0144535	0.0243507	47.7107	46.4688	49.5354	51.9542	2.24463	45.4661	49.9553	-0.0397969	-0.0614462	-0.00807099	0.0339656	0.0390433	-0.0788401	-0.000753584
189.82	0.88533	15.0264	4.34373	3.16677	3.3583	7.13737	1.82829	2.51544	6.17202	-1.34285	-1.48541	-1.45905	-1.1143	0.16907	-1.17378	-1.51192	32.8404	32.6834	31.1286	26.9158	2.43651	30.4039	35.2769	-0.3107	1.51433	1.49316	1.43001	0.0358174	-0.346517	-0.274882	62.8159	64.1499	65.5131	65.9468	0.765621	62.0503	63.5815	0.227712	0.252705	0.278674	0.287036	0.0146172	0.213095	0.242329
190.39	0.84958	17.273	5.31613	5.48199	3.37629	7.47305	1.67271	3.64342	6.98884	-1.25068	-1.23658	-1.45664	-1.09277	0.149634	-1.10105	-1.40031	30.5739	26.7187	30.8225	25.6675	2.2241	28.3499	32.798	-0.356171	1.42682	1.48887	1.40938	0.0341109	-0.390282	-0.32206	64.1099	67.7993	65.8012	66.8594	0.816185	63.2937	64.9261	0.251951	0.32336	0.284224	0.304803	0.0159845	0.235966	0.267935
191.3	0.50451	32.9689	13.184	11.3467	11.8234	16.2898	2.22635	10.9577	15.4104	-0.818551	-0.892824	-0.872609	-0.710862	0.0814321	-0.737119	-0.899983	19.727	18.7195	17.7081	14.6172	1.74498	17.982	21.472	-0.609509	1.27229	1.24817	1.16487	0.0460225	-0.655532	-0.563486	67.089	69.9338	70.4685	69.093	0.566178	66.5228	67.6551	0.30931	0.366608	0.377709	0.349376	0.0116569	0.297653	0.320967
191.5	0.98669	5.22484	30.0779	37.7606	28.1772	29.1772	4.30135	25.7766	34.3793	-0.366366	-0.217027	-0.406364	-0.385129	0.0846941	-0.281672	-0.45106	37.8771	45.6992	32.0647	27.1657	7.84141	30.0357	45.7185	-0.214874	1.65991	1.50603	1.43402	0.0942156	-0.30909	-0.120659	32.0449	16.5402	39.758	43.657	11.9703	20.0746	44.0152	-0.326463	-0.702937	-0.180474	-0.110786	0.264253	-0.590715	-0.0622097
192	0.98004	6.43611	17.7847	19.34	18.33	18.3376	0.47434	17.3103	18.259	-0.664907	-0.620201	-0.648901	-0.648679	0.0134769	-0.65143	-0.678384	48.5284	50.508	46.7386	42.7817	3.15455	45.3738	51.6829	-0.025572	1.70336	1.66968	1.63126	0.0294567	-0.0550287	0.00388463	33.687	30.152	34.9314	38.8807	3.56883	30.1181	37.2558	-0.294137	-0.364838	-0.270155	-0.196445	0.0689237	-0.363061	-0.225214
192.5	0.98979	4.59414	11.8328	12.9227	11.7721	13.118	0.593784	11.239	12.4266	-0.87222	-0.828553	-0.874752	-0.821064	0.0237411	-0.848479	-0.895961	46.7887	48.299	45.8517	40.1846	3.39853	43.3902	50.1872	-0.0558629	1.68394	1.66136	1.60406	0.0336212	-0.0894841	-0.0222417	41.3785	38.7783	42.3762	46.6975	3.23748	38.141	44.616	-0.151282	-0.198317	-0.13348	-0.0574546	0.0575671	-0.208849	-0.0937147
193	0.9912	4.28429	6.65592	7.00052	6.60312	8.29598	0.722797	5.93312	7.37872	-1.14688	-1.12335	-1.15058	-1.04352	0.0454322	-1.10145	-1.19231	46.8951	48.6857	45.5093	40.4521	3.39048	43.5047	50.2856	-0.0540066	1.6874	1.6581	1.60694	0.0332496	-0.0872562	-0.020757	46.449	44.3138	47.8875	51.252	2.83293	43.616	49.2819	-0.0617921	-0.0992089	-0.0367189	0.0217535	0.0493918	-0.111184	-0.0124003
193.5	0.98993	4.53771	6.19952	6.57697	6.27566	7.65405	0.591688	5.60783	6.79121	-1.17985	-1.15243	-1.17419	-1.08153	0.039564	-1.14028	-1.21941	46.5898	49.6375	44.0276	40.1025	3.91284	42.677	50.5027	-0.0593328	1.69581	1.64372	1.60317	0.0379169	-0.0972497	-0.0214159	47.2107	43.7856	49.6968	52.2435	3.54281	43.6678	50.7535	-0.0485063	-0.108517	-0.00526771	0.0389991	0.0618069	-0.110313	0.0133006
194	0.98541	5.53536	5.41624	5.45854	5.03097	7.99246	1.30699	4.10925	6.72323	-1.24212	-1.23855	-1.27593	-1.06114	0.0936916	-1.14843	-1.33581	46.0159	50.8842	44.4184	36.5656	5.85469	40.1612	51.8706	-0.0693574	1.70658	1.64756	1.56307	0.0588947	-0.128252	-0.0104627	48.5678	43.6573	50.5506	55.442	4.83417	43.7337	53.402	-0.0248861	-0.110781	0.00956616	0.0949125	0.0843785	-0.109265	0.0594923
194.5	0.98903	4.74435	6.62602	7.20407	5.93094	8.62718	1.1013	5.52472	7.72732	-1.14897	-1.10995	-1.20032	-1.02495	0.0716078	-1.07737	-1.22058	43.5712	45.6118	42.5289	35.9318	4.0377	39.5335	47.6089	-0.112302	1.65908	1.62868	1.55548	0.0434807	-0.155783	-0.0688211	49.8028	47.1841	51.5401	55.441	3.37256	46.4303	53.1754	-0.00342556	-0.0489688	0.0267636	0.0948951	0.0587595	-0.0621851	0.055334
195	0.98934	4.60792	9.88204	10.6519	9.45543	11.3993	0.800619	9.08142	10.6827	-0.959965	-0.923656	-0.981181	-0.890558	0.037442	-0.922523	-0.997407	41.7736	44.0116	39.3607	35.3588	3.53579	38.2378	45.3094	-0.144219	1.64357	1.59506	1.5485	0.0388146	-0.183033	-0.105404	48.3444	45.3365	51.1838	53.2419	3.34868	44.9957	51.6931	-0.0287714	-0.08125	0.0205691	0.0563963	0.0583069	-0.0870783	0.0295355
196.1	0.98959	4.75473	0	0	0	0	0	0	0	#NUM!	#NUM!	#NUM!	#NUM!	#NUM!	#NUM!	#NUM!	50.9412	52.2593	49.5616	46.2472	2.45872	48.4825	53.3999	0.0163519	1.71816	1.69515	1.66509	0.0217325	-0.00538055	0.0380844	49.0588	47.7407	50.4384	53.7528	2.45872	46.6001	51.5175	-0.0163519	-0.0392748	0.00761564	0.0653153	0.0427747	-0.0591266	0.0264228
197	0.95187	9.79106	18.4521	18.9088	18.6396	20.3267	0.740041	17.7121	19.1922	-0.645366	-0.63231	-0.639976	-0.593247	0.0204622	-0.624904	-0.665828	42.9291	46.4765	40.4725	36.0576	4.26992	38.6592	47.199	-0.123663	1.66723	1.60716	1.557	0.0450641	-0.168727	-0.078599	38.6188	34.6147	40.8879	43.6157	3.76844	34.8503	42.3872	-0.201237	-0.276219	-0.160082	-0.111516	0.0691002	-0.270337	-0.132137
198.38	0.98658	5.51223	3.49991	6.64775	4.82214	2.40971	1.73569	1.76422	5.2356	-1.44047	-1.14745	-1.2953	-1.60744	0.191742	-1.24873	-1.63221	68.8291	68.8084	67.4725	64.7437	1.69158	67.1375	70.5207	0.344023	1.83764	1.82913	1.8112	0.0110215	0.333002	0.355045	27.671	24.5438	27.7054	32.8466	3.42156	24.2494	31.0925	-0.417288	-0.487753	-0.416542	-0.310578	0.0727937	-0.490082	-0.344494
200.66	0.99028	4.71441	3.29571	6.11175	4.80184	2.20709	1.62258	1.67313	4.91829	-1.4675	-1.18645	-1.29722	-1.64649	0.196043	-1.27145	-1.66354	68.6017	69.3689	66.1077	65.0719	1.83099	66.7707	70.4327	0.339429	1.84117	1.82025	1.81339	0.0118117	0.327617	0.351241	28.1026	24.5193	29.0905	32.721	3.35565	24.7469	31.4582	-0.407968	-0.488328	-0.386954	-0.313053	0.0718478	-0.479815	-0.33612
202.95	0.99406	3.64287	22.7769	26.8729	25.0471	20.3091	2.7662	20.0107	25.5431	-0.530253	-0.434763	-0.47603	-0.593718	0.0673469	-0.462906	-0.5976	64.0011	63.5357	61.3719	62.2819	0.887102	63.114	64.8883	0.249899	1.80302	1.78797	1.79436	0.00616672	0.243732	0.256066	13.222	9.59133	13.581	17.409	3.19179	10.0302	16.4138	-0.817114	-0.974331	-0.803677	-0.676158	0.122153	-0.939267	-0.694961
206.37	0.99502	3.33134	15.3221	19.8356	17.3178	12.5442	3.02382	12.2982	18.3459	-0.742453	-0.606538	-0.678919	-0.843348	0.0990818	-0.643371	-0.841535	68.4644	67.6518	65.6439	67.1976	0.859686	67.6048	69.3241	0.336665	1.83028	1.81719	1.82735	0.00560726	0.331057	0.342272	16.2135	12.5127	17.0383	20.2583	3.17707	13.0364	19.3905	-0.713298	-0.844594	-0.687453	-0.595082	0.103001	-0.816298	-0.610297
208.08	0.99554	3.15804	21.1927	25.2997	23.1536	18.7775	2.71409	18.4786	23.9068	-0.570381	-0.470206	-0.521006	-0.63604	0.0693735	-0.501007	-0.639754	64.3019	63.5495	61.8674	62.8876	0.691908	63.61	64.9938	0.255578	1.80311	1.79146	1.79856	0.00479435	0.250784	0.260373	14.5054	11.1507	14.9791	18.3349	2.93505	11.5704	17.4405	-0.770408	-0.90135	-0.754041	-0.648757	0.103596	-0.874003	-0.666812
209.8	0.99521	3.29549	18.1505	22.5844	20.4395	15.362	3.02848	15.122	21.1789	-0.654128	-0.535021	-0.590227	-0.741119	0.0871095	-0.567019	-0.741238	70.0226	68.767	68.1638	68.5716	0.251291	69.7713	70.2739	0.368445	1.83738	1.83355	1.83614	0.00159436	0.366851	0.370039	11.8269	8.6486	11.3966	16.0664	3.062	8.7649	14.8889	-0.872465	-1.02377	-0.890673	-0.718016	0.125171	-0.997636	-0.747294
211.05	0.98965	4.89218	2.15802	6.18721	4.00398	0.31108	2.42517	-0.267147	4.58319	-1.65647	-1.18077	-1.37976	-2.50577	0.583395	-1.07307	-2.23987	76.6564	77.4287	74.6805	72.6354	1.96386	74.6925	78.6202	0.51638	1.8889	1.87321	1.86115	0.0113627	0.505017	0.527743	21.1856	16.3841	21.3155	27.0535	4.35992	16.8257	25.5455	-0.570565	-0.707868	-0.567193	-0.430781	0.113124	-0.683689	-0.45744
213.5	0.99252	4.18245	0	1.88057	0.59837	0	0.784476	-0.784476	0.784476	#NUM!	-1.71747	-2.22042	#NUM!	#NUM!	#NUM!	#NUM!	67.033	70.2738	64.236	61.7505	3.57896	63.454	70.6119	0.308209	1.84679	1.80778	1.79064	0.0234972	0.284711	0.331706	32.967	27.8456	35.1657	38.2495	4.36315	28.6039	37.3302	-0.308209	-0.413506	-0.265686	-0.208015	0.0865405	-0.394749	-0.221668
214.5	0.9941	3.65759	2.36178	4.42723	3.25304	2.2847	0.876029	1.48575	3.23781	-1.61638	-1.3342	-1.47335	-1.63113	0.121301	-1.49508	-1.73768	61.4311	63.5215	59.1284	55.8788	3.13175	58.2993	64.5628	0.20215	1.80292	1.7718	1.74725	0.0227815	0.179369	0.224932	36.2071	32.0512	37.6186	41.8365	4.00746	32.1997	40.2146	-0.245978	-0.326337	-0.219652	-0.143096	0.0751443	-0.321122	-0.170833
215	0.98995	4.74498	0	0	0	0	0	0	0	#NUM!	#NUM!	#NUM!	#NUM!	#NUM!	#NUM!	#NUM!	68.4436	76.9384	65.8905	60.8233	6.7283	61.7153	75.1719	0.336246	1.88614	1.81882	1.78407	0.0423724	0.293873	0.378618	31.5564	23.0616	34.1095	39.1767	6.7283	24.8281	38.2847	-0.336246	-0.523253	-0.285947	-0.191041	0.139716	-0.475962	-0.196529
216.08	0.98864	5.16371	0	2.66791	1.00935	0	1.09987	-1.09987	1.09987	#NUM!	-1.56208	-1.99155	#NUM!	#NUM!	#NUM!	#NUM!	75.873	78.9731	74.2962	69.3945	3.91081	71.9622	79.7838	0.497585	1.89748	1.87097	1.84132	0.0229367	0.474648	0.520521	24.127	18.359	24.6944	30.6055	5.00062	19.1263	29.1276	-0.497585	-0.64806	-0.484228	-0.355525	0.119713	-0.617298	-0.377871
216.65	0.99197	4.16095	4.60026	7.92684	6.61358	2.75164	2.19651	2.40375	6.79677	-1.31676	-1.06503	-1.14985	-1.54829	0.210684	-1.10608	-1.52745	70.8195	72.685	66.6719	67.9951	2.57991	68.2396	73.3994	0.385059	1.86144	1.82394	1.83248	0.0160497	0.36901	0.401109	24.5803	19.3882	26.7145	29.2532	4.1825	20.3978	28.7628	-0.486898	-0.618862	-0.43827	-0.383533	0.100548	-0.587446	-0.38635
218.39	0.92421	13.6334	73.5601	71.1879	73.079	75.0281	1.56785	71.9922	75.1279	0.444381	0.39283	0.433702	0.477774	0.0346861	0.479067	0.409695	0	0	0	0	0	0	0	#NUM!	#NUM!	#NUM!	#NUM!	#NUM!	#NUM!	#NUM!	26.4399	28.8121	26.921	24.9718	1.56785	24.8721	28.0078	-0.444381	-0.39283	-0.433702	-0.477774	0.0346861	-0.479067	-0.409695
218.93	0.97562	7.87963	0	9.43781	2.04521	0	4.05388	-4.05388	4.05388	#NUM!	-0.982076	-1.68029	#NUM!	#NUM!	#NUM!	#NUM!	100	90.5622	97.9548	100	4.05388	95.9461	104.054	#DIV/0!	1.95695	1.99103	2	0.0185456	#DIV/0!	#DIV/0!	0	0	0	0	0	0	0	#NUM!	#NUM!	#NUM!	#NUM!	#NUM!	#NUM!	#NUM!
221.21	0.96126	8.79638	0	0	0	1.58999	0.749528	-0.749528	0.749528	#NUM!	#NUM!	#NUM!	-1.79164	#NUM!	#NUM!	#NUM!	47.9466	49.882	45.8806	41.544	3.40488	44.5417	51.3514	-0.0356922	1.69794	1.66163	1.61851	0.032469	-0.0681611	-0.0032232	52.0534	50.118	54.1194	56.866	2.77069	49.2828	54.8241	0.0356922	0.00204935	0.0717242	0.120032	0.0484289	-0.0127367	0.084121
222.93	0.98727	5.56802	0	0	0	0	0	0	0	#NUM!	#NUM!	#NUM!	#NUM!	#NUM!	#NUM!	#NUM!	67.5622	72.6463	67.977	60.4263	5.03482	62.5274	72.597	0.318652	1.86121	1.83236	1.78123	0.0330746	0.285578	0.351727	32.4378	27.3537	32.023	39.5737	5.03482	27.403	37.4726	-0.318652	-0.424197	-0.3269	-0.183818	0.0987256	-0.417378	-0.219927
223.5	0.99744	2.45168	1.38395	4.84743	3.14923	0.02402	1.99767	-0.613718	3.38162	-1.85283	-1.29291	-1.4879	-3.61932	1.05373	-0.799094	-2.90656	74.4112	75.8673	72.5088	69.829	2.47031	71.9409	76.8815	0.463588	1.88005	1.86039	1.84404	0.0147253	0.448863	0.478314	24.2049	19.2852	24.342	30.147	4.43779	19.7671	28.6426	-0.495739	-0.621728	-0.4925	-0.364942	0.104833	-0.600572	-0.390906
224.07	0.99451	3.6581	0	0	0	0	0	0	0	#NUM!	#NUM!	#NUM!	#NUM!	#NUM!	#NUM!	#NUM!	79.2089	84.8609	79.8265	72.5332	5.06083	74.148	84.2697	0.580896	1.92871	1.90215	1.86054	0.0280557	0.55284	0.608952	20.7911	15.1391	20.1735	27.4668	5.06083	15.7303	25.852	-0.580896	-0.748608	-0.597366	-0.42173	0.133571	-0.714467	-0.447325
225.21	0.99684	2.69376	2.1726	7.42547	4.67108	0	3.06491	-0.892314	5.23751	-1.65348	-1.09577	-1.30981	#NUM!	#NUM!	#NUM!	#NUM!	84.5308	84.5046	82.0533	81.1405	1.42048	83.1104	85.9513	0.737548	1.92688	1.9141	1.90924	0.00744104	0.730107	0.744989	13.2966	8.0699	13.2757	18.8595	4.40574	8.89082	17.7023	-0.814297	-1.05659	-0.815085	-0.633707	0.173222	-0.987519	-0.641075
226.35	0.99811	2.0943	0.81822	4.90665	2.93788	0	2.01611	-1.19789	2.83433	-2.08356	-1.28737	-1.51902	#NUM!	#NUM!	#NUM!	#NUM!	76.4987	76.625	73.8252	71.9453	1.92274	74.5759	78.4214	0.512562	1.88437	1.8682	1.857	0.011234	0.501328	0.523796	22.6831	18.4683	23.2369	28.0547	3.91363	18.7695	26.5967	-0.532572	-0.644899	-0.518975	-0.408998	0.0963798	-0.628952	-0.436192
227.49	0.99323	3.95718	0	0	0	0	0	0	0	#NUM!	#NUM!	#NUM!	#NUM!	#NUM!	#NUM!	#NUM!	62.1002	65.7909	62.3855	55.903	4.10136	57.9989	66.2016	0.214457	1.81817	1.79508	1.74744	0.0294506	0.185006	0.243907	37.8998	34.2091	37.6145	44.097	4.10136	33.7984	42.0011	-0.214457	-0.284025	-0.219728	-0.103026	0.0749176	-0.289374	-0.139539
229.78	0.99297	3.89899	0	0	0	0	0	0	0	#NUM!	#NUM!	#NUM!	#NUM!	#NUM!	#NUM!	#NUM!	63.231	67.4864	62.4423	57.5105	4.07274	59.1583	67.3037	0.235448	1.82922	1.79548	1.75975	0.0283646	0.207083	0.263813	36.769	32.5136	37.5577	42.4895	4.07274	32.6963	40.8417	-0.235448	-0.317152	-0.22078	-0.131466	0.0758243	-0.311272	-0.159624
230.35	0.99567	2.99322	0	2.15456	0.14204	0	0.9839	-0.9839	0.9839	#NUM!	-1.65718	-2.84697	#NUM!	#NUM!	#NUM!	#NUM!	64.0532	67.3386	66.1607	59.4031	3.49641	60.5567	67.5496	0.25088	1.82826	1.8206	1.77381	0.024068	0.226812	0.274948	35.9468	30.5068	33.6973	40.5969	4.211	31.7359	40.1578	-0.25088	-0.357546	-0.293937	-0.165317	0.0799589	-0.330839	-0.170921
231.72	0.99903	1.48671	5.30925	9.89016	7.17161	2.97039	2.84652	2.46273	8.15577	-1.25127	-0.959569	-1.11206	-1.51409	0.233898	-1.01738	-1.48517	75.9011	74.9392	74.3652	73.338	0.662372	75.2387	76.5635	0.498251	1.87471	1.87137	1.86533	0.00388202	0.494369	0.502133	18.7896	15.1707	18.4632	23.6917	3.50848	15.2812	22.2981	-0.635693	-0.747542	-0.645047	-0.507977	0.098141	-0.733834	-0.537552
233.54	0.99512	3.38218	0	2.84523	1.05836	0	1.17418	-1.17418	1.17418	#NUM!	-1.53335	-1.97075	#NUM!	#NUM!	#NUM!	#NUM!	77.6255	79.6051	76.809	71.3309	3.4366	74.1889	81.0621	0.540252	1.90094	1.88541	1.85328	0.0198483	0.520403	0.5601	22.3745	17.5496	22.1326	28.6691	4.56281	17.8117	26.9373	-0.540252	-0.671924	-0.546323	-0.395863	0.112854	-0.653106	-0.427398
235.48	0.99787	2.24748	0	3.99997	1.09005	0	1.68838	-1.68838	1.68838	#NUM!	-1.38021	-1.95779	#NUM!	#NUM!	#NUM!	#NUM!	82.9358	82.7153	82.7039	77.4658	2.47196	80.4639	85.4078	0.686657	1.91759	1.91753	1.88911	0.0134096	0.673248	0.700067	17.0642	13.2847	16.206	22.5342	3.86052	13.2036	20.9247	-0.686657	-0.814744	-0.713537	-0.536268	0.115092	-0.801749	-0.571565
237.77	0.99561	3.17215	0	5.73	2.16942	0	2.36213	-2.36213	2.36213	#NUM!	-1.21622	-1.65413	#NUM!	#NUM!	#NUM!	#NUM!	88.5802	88.7842	86.182	82.3742	2.63228	85.9479	91.2125	0.889678	1.94834	1.93542	1.91579	0.0133801	0.876298	0.903058	11.4198	5.48576	11.6485	17.6258	4.95636	6.46345	16.3762	-0.889678	-1.23626	-0.879942	-0.669641	0.233868	-1.12355	-0.65581
239.02	0.99699	2.64211	0	0.52071	0	0	0.245465	-0.245465	0.245465	#NUM!	-2.28114	#NUM!	#NUM!	#NUM!	#NUM!	#NUM!	70.4538	73.5037	70.8668	64.5929	3.73746	66.7164	74.1913	0.377403	1.86631	1.85044	1.81018	0.023623	0.35378	0.401026	29.5462	25.9756	29.1332	35.4071	3.91983	25.6264	33.466	-0.377403	-0.454809	-0.386054	-0.261094	0.0801857	-0.457589	-0.297217
240.39	0.99492	3.33834	8.57454	10.9664	9.39549	7.97301	1.22256	7.35198	9.7971	-1.02786	-0.909489	-0.98423	-1.06229	0.0623869	-0.965469	-1.09024	60.7298	60.0882	59.3734	57.6886	1.00596	59.7238	61.7357	0.189338	1.77879	1.77359	1.76109	0.00742796	0.18191	0.196766	30.6957	28.9453	31.2311	34.3383	2.21019	28.4855	32.9059	-0.353683	-0.390014	-0.342806	-0.281532	0.0444113	-0.398094	-0.309272
242.33	0.98954	4.76699	7.23645	9.51721	8.29746	6.92138	1.06038	6.17607	8.29683	-1.10785	-0.978056	-1.04344	-1.12866	0.0616602	-1.04619	-1.16951	60.96	61.5257	59.1357	56.7392	1.9541	59.0059	62.9141	0.193536	1.78906	1.77185	1.75388	0.0143607	0.179175	0.207896	31.8035	28.9571	32.5668	36.3394	3.01408	28.7894	34.8176	-0.331287	-0.389766	-0.316099	-0.243492	0.0597166	-0.391003	-0.27157
243.48	0.99035	4.53533	15.0658	17.6876	15.9583	14.5521	1.28234	13.7835	16.3482	-0.75109	-0.667796	-0.721509	-0.768777	0.0412531	-0.709837	-0.792343	55.6069	56.7951	52.9926	51.7996	2.13012	53.4768	57.737	0.097813	1.75431	1.72422	1.71433	0.0170041	0.0808089	0.114817	29.3273	25.5174	31.0491	33.6484	3.39068	25.9366	32.718	-0.38198	-0.46522	-0.34649	-0.294888	0.071315	-0.453295	-0.310665
244.62	0.99295	3.82274	8.62038	10.2082	9.08518	9.0048	0.549347	8.07103	9.16973	-1.02532	-0.944285	-1.0003	-1.00454	0.027461	-0.997862	-1.05278	52.7363	54.2648	50.2209	47.9675	2.60528	50.131	55.3416	0.0475819	1.73452	1.70088	1.68095	0.0221073	0.0254746	0.0696893	38.6433	35.5269	40.694	43.0277	3.13414	35.5092	41.7775	-0.200788	-0.25882	-0.163569	-0.121916	0.0573011	-0.258089	-0.143486
245.19	0.98686	5.36631	12.6169	15.2241	13.8721	11.9638	1.33746	11.2795	13.9544	-0.840473	-0.745742	-0.793002	-0.866794	0.0498132	-0.79066	-0.890286	59.0903	59.5634	57.6579	54.5624	2.06082	57.0295	61.1511	0.15969	1.77498	1.76086	1.73689	0.0157207	0.143969	0.175411	28.2928	25.2126	28.47	33.4738	3.39768	24.8951	31.6904	-0.403888	-0.472212	-0.400101	-0.298287	0.0713487	-0.475236	-0.332539
248.04	0.99356	3.74082	15.2398	17.8925	16.6231	14.3056	1.48502	13.7548	16.7249	-0.745211	-0.661712	-0.700332	-0.777445	0.048111	-0.6971	-0.793322	58.3765	58.6925	56.1486	55.0319	1.53182	56.8447	59.9083	0.1469	1.76858	1.74934	1.74061	0.011684	0.135216	0.158584	26.3836	23.415	27.2282	30.6624	2.9601	23.4235	29.3437	-0.44564	-0.51465	-0.426943	-0.354362	0.0655342	-0.511174	-0.380106
249.76	0.98418	5.86375	9.28929	11.2899	9.62996	9.60475	0.788527	8.50076	10.0778	-0.989676	-0.895282	-0.9724	-0.97366	0.0366544	-0.953022	-1.02633	55.6007	56.5228	54.538	50.3124	2.58983	53.0109	58.1906	0.097705	1.75222	1.7367	1.70167	0.0211422	0.0765628	0.118847	35.11	32.1872	35.832	40.0829	3.22654	31.8834	38.3365	-0.266748	-0.323628	-0.253047	-0.174593	0.0608717	-0.327619	-0.205876
250.9	0.99322	3.69257	25.2271	26.5436	25.5674	25.5778	0.45777	24.7693	25.6849	-0.471877	-0.442069	-0.464076	-0.46384	0.010319	-0.461558	-0.482196	41.1199	40.7161	38.9183	38.247	1.04238	40.0775	42.1622	-0.155917	1.60977	1.59015	1.5826	0.0114498	-0.167367	-0.144467	33.653	32.7403	35.5142	36.1753	1.48813	32.1649	35.1412	-0.294797	-0.312672	-0.259061	-0.246577	0.0286716	-0.323469	-0.266125
253.75	0.99669	2.65352	15.988	17.4486	16.6406	16.134	0.541384	15.4466	16.5294	-0.720547	-0.674963	-0.699785	-0.715845	0.0168171	-0.70373	-0.737364	51.2101	49.7028	51.1272	47.6837	1.41282	49.7973	52.6229	0.0210252	1.69638	1.70865	1.67837	0.0124368	0.0085884	0.0334619	32.8019	32.8486	32.2321	36.1824	1.73522	31.0667	34.5371	-0.311458	-0.310539	-0.322735	-0.246443	0.033462	-0.34492	-0.277996
256.61	0.97988	6.57642	12.137	12.2741	12.3097	13.8196	0.720328	11.4166	12.8573	-0.859696	-0.854139	-0.852704	-0.794912	0.0275878	-0.832108	-0.887284	44.6517	47.1738	42.6145	38.4538	3.56116	41.0906	48.2129	-0.0932654	1.6737	1.62956	1.58494	0.0362369	-0.129502	-0.0570285	43.2113	40.5521	45.0758	47.7266	2.96204	40.2493	46.1733	-0.118665	-0.166123	-0.0858199	-0.0395206	0.0523028	-0.170968	-0.066362
258.32	0.98955	4.66432	17.1571	17.6241	17.2774	18.4327	0.484042	16.6731	17.6412	-0.68381	-0.669694	-0.680145	-0.645928	0.0143175	-0.669493	-0.698128	40.9231	42.4473	39.1513	35.4357	2.86416	38.0589	43.7873	-0.159449	1.62785	1.59275	1.54944	0.0320685	-0.191518	-0.127381	41.9198	39.9287	43.5713	46.1316	2.54516	39.3746	44.4649	-0.14161	-0.177382	-0.1123	-0.0673354	0.0451761	-0.186786	-0.0964335
260.72	0.93045	11.8268	12.5189	10.5389	11.018	16.594	2.74844	9.7705	15.2674	-0.844346	-0.928839	-0.907201	-0.701247	0.102569	-0.741778	-0.946915	24.4518	26.8704	24.4033	15.4202	4.92036	19.5314	29.3721	-0.489914	1.42927	1.38745	1.18809	0.105232	-0.595146	-0.384682	63.0293	62.5907	64.5787	67.9858	2.2278	60.8015	65.2571	0.231685	0.223531	0.260825	0.327076	0.0428198	0.188865	0.274504

## Sheet: Fig.5 Berg. EM densities
Grain size	ln(Grain size)	Phi	EM 1	EM 2	EM 3
0.01	-4.60517	16.6096	0	0	0
0.0114	-4.47414	16.4206	0	0	0
0.0129	-4.35053	16.2423	0	0	0
0.0147	-4.21991	16.0538	0	0	0
0.0167	-4.09235	15.8698	0	0	0
0.0189	-3.96859	15.6913	0	0	0
0.0215	-3.8397	15.5053	0	0	0
0.0244	-3.71317	15.3228	0	0	0
0.0278	-3.58272	15.1346	0	0	0
0.0315	-3.45777	14.9543	0	0	0
0.0358	-3.32981	14.7697	0	0	0
0.0407	-3.20153	14.5846	0	0	0
0.0463	-3.07261	14.3986	0	0	0
0.0526	-2.94504	14.2146	0	0	0
0.0597	-2.81842	14.0319	0	0	0
0.0679	-2.68972	13.8462	0	0	0
0.0771	-2.56265	13.6629	0	0	0
0.0876	-2.43497	13.4787	0	0	0
0.0995	-2.3076	13.2949	0	0	0
0.113	-2.18037	13.1114	0	0	0
0.128	-2.05573	12.9316	0	0	0
0.146	-1.92415	12.7417	0	0	0
0.166	-1.79577	12.5565	0	0	0
0.188	-1.67131	12.377	0	0	0
0.214	-1.54178	12.1901	0	0	0
0.243	-1.41469	12.0068	9e-05	9e-05	0
0.276	-1.28735	11.823	0.00069	0.00069	0
0.314	-1.15836	11.637	0.00146	0.00124	0.00028
0.357	-1.03002	11.4518	0.00215	0.00298	0.00342
0.405	-0.90387	11.2698	0.00685	0.00672	0.0164
0.46	-0.77653	11.0861	0.00855	0.031	0.04817
0.523	-0.64817	10.9009	0.01367	0.06433	0.10003
0.594	-0.52088	10.7172	0.01672	0.09755	0.15644
0.675	-0.39304	10.5328	0.01871	0.11337	0.17556
0.767	-0.26527	10.3485	0.01773	0.10745	0.16703
0.872	-0.13697	10.1634	0.02275	0.09514	0.1511
0.991	-0.00904	9.97883	0.08356	0.08189	0.17404
1.13	0.12222	9.78946	0.25835	0.1108	0.25056
1.28	0.24686	9.60964	0.57239	0.2142	0.35608
1.45	0.37156	9.42973	1.03625	0.40176	0.49287
1.65	0.50078	9.24332	1.62394	0.6401	0.66067
1.88	0.63127	9.05505	2.2797	0.89719	0.8264
2.13	0.75612	8.87493	2.94367	1.13626	0.97865
2.42	0.88377	8.69078	3.57927	1.34505	1.09914
2.75	1.0116	8.50635	4.18425	1.53731	1.18095
3.12	1.13783	8.32424	4.76847	1.74674	1.22862
3.55	1.26695	8.13797	5.32817	1.99486	1.2444
4.03	1.39377	7.955	5.83167	2.2781	1.23038
4.58	1.5217	7.77044	6.22783	2.57948	1.18068
5.21	1.65058	7.5845	6.47058	2.87268	1.09948
5.92	1.77834	7.40019	6.54526	3.14684	0.99858
6.72	1.90509	7.21732	6.46062	3.40555	0.89074
7.64	2.0334	7.03221	6.23305	3.64431	0.79672
8.68	2.16102	6.84809	5.88207	3.86624	0.72694
9.86	2.28849	6.6642	5.43403	4.06565	0.70326
11.2	2.41591	6.48036	4.90829	4.24455	0.72856
12.7	2.5416	6.29903	4.32472	4.39557	0.81759
14.5	2.67415	6.1078	3.70378	4.51584	0.97276
16.4	2.79728	5.93016	3.06264	4.59671	1.19417
18.7	2.92852	5.74082	2.42146	4.63155	1.48031
21.2	3.054	5.55979	1.79981	4.6194	1.82285
24.1	3.18221	5.37482	1.21825	4.55262	2.21213
27.4	3.31054	5.18968	0.69883	4.43005	2.63251
31.1	3.43721	5.00694	0.25864	4.25671	3.05886
35.3	3.56388	4.82419	0	3.95506	3.50911
40.1	3.69138	4.64025	0	3.47445	3.98525
45.6	3.81991	4.45482	0	3.03236	4.3338
51.8	3.94739	4.2709	0	2.6302	4.53426
58.9	4.07584	4.08559	0	2.26308	4.58448
66.9	4.2032	3.90185	0	1.92804	4.49103
76	4.33073	3.71786	0	1.61704	4.28001
86.4	4.45899	3.53282	0	1.3272	3.98415
98.1	4.58599	3.3496	0	1.0563	3.64793
111	4.70953	3.17137	0	0.80343	3.32237
127	4.84419	2.9771	0.00152	0.57433	3.04044
144	4.96981	2.79586	0.04016	0.35476	2.83444
163	5.09375	2.61706	0.07255	0.17303	2.70492
186	5.22575	2.42663	0.09104	0.03914	2.63395
211	5.35186	2.24469	0.10727	0	2.51393
240	5.48064	2.05889	0.11946	0	2.37379
272	5.6058	1.87832	0.14268	0	2.21465
310	5.73657	1.68966	0.16715	0	2.00679
352	5.86363	1.50635	0.18776	0	1.75868
400	5.99146	1.32193	0.19717	0	1.46983
454	6.1181	1.13924	0.19061	0	1.15559
516	6.24611	0.95456	0.16686	0	0.86716
586	6.37332	0.77103	0.12731	0	0.62534
666	6.50129	0.58641	0.08014	0	0.45017
756	6.62804	0.40354	0.04179	0	0.32005
859	6.75577	0.21927	0.01699	0	0.21804
976	6.88346	0.03505	0.00065	0	0.14924
1110	7.01212	-0.15056	0	0	0.08859
1260	7.13887	-0.33342	0	0	0.0424
1430	7.26543	-0.51602	0	0.00944	0.00227
1630	7.39634	-0.70487	0	0.00998	0
1850	7.52294	-0.88753	0	0.00851	0
2100	7.64969	-1.07039	0	0.00666	0
2390	7.77905	-1.25701	0	0.00454	0
2710	7.9047	-1.43829	0	0.00269	0
3080	8.03268	-1.62293	0	0.00122	0
3500	8.16052	-1.80735	0	0	0

## Sheet: Berglivatnet Mastersizer meas.
Measurement no.	Sample depth (cm)	Dx (10)	Dx (50)	Dx (90)	0.01	0.0114	0.0129	0.0147	0.0167	0.0189	0.0215	0.0244	0.0278	0.0315	0.0358	0.0407	0.0463	0.0526	0.0597	0.0679	0.0771	0.0876	0.0995	0.113	0.128	0.146	0.166	0.188	0.214	0.243	0.276	0.314	0.357	0.405	0.46	0.523	0.594	0.675	0.767	0.872	0.991	1.13	1.28	1.45	1.65	1.88	2.13	2.42	2.75
1	1	2,51	7,40	24,6	0	0	0	0	0	0	0	0	0	0	0	0	0	0	0	0	0	0	0	0	0	0	0	0	0	0	0	0	0	0	0.09	0.13	0.16	0.16	0.15	0.16	0.22	0.37	0.63	1.02	1.49	2.02	2.55	3.07	3.57
2		2,50	7,38	24,6	0	0	0	0	0	0	0	0	0	0	0	0	0	0	0	0	0	0	0	0	0	0	0	0	0	0	0	0	0	0	0.09	0.14	0.16	0.16	0.16	0.16	0.22	0.37	0.64	1.02	1.5	2.02	2.56	3.08	3.58
3		2,50	7,38	24,6	0	0	0	0	0	0	0	0	0	0	0	0	0	0	0	0	0	0	0	0	0	0	0	0	0	0	0	0	0	0	0.1	0.14	0.16	0.17	0.16	0.17	0.23	0.38	0.64	1.03	1.5	2.03	2.57	3.09	3.58
1	3	2,54	7,25	25,3	0	0	0	0	0	0	0	0	0	0	0	0	0	0	0	0	0	0	0	0	0	0	0	0	0	0	0	0	0	0	0	0	0.07	0.09	0.1	0.1	0.15	0.3	0.58	1	1.54	2.13	2.71	3.26	3.77
2		2,54	7,28	26,1	0	0	0	0	0	0	0	0	0	0	0	0	0	0	0	0	0	0	0	0	0	0	0	0	0	0	0	0	0	0	0	0	0.08	0.09	0.1	0.1	0.15	0.3	0.58	1	1.53	2.12	2.7	3.25	3.75
3		2,54	7,25	25,6	0	0	0	0	0	0	0	0	0	0	0	0	0	0	0	0	0	0	0	0	0	0	0	0	0	0	0	0	0	0	0	0	0.08	0.1	0.1	0.1	0.15	0.3	0.58	1	1.54	2.13	2.71	3.26	3.76
1	5	2,59	7,20	25,6	0	0	0	0	0	0	0	0	0	0	0	0	0	0	0	0	0	0	0	0	0	0	0	0	0	0	0	0	0	0	0	0	0	0	0	0	0.11	0.26	0.55	0.97	1.51	2.11	2.71	3.28	3.81
2		2,60	7,22	26,1	0	0	0	0	0	0	0	0	0	0	0	0	0	0	0	0	0	0	0	0	0	0	0	0	0	0	0	0	0	0	0	0	0	0	0	0	0.11	0.26	0.54	0.97	1.51	2.11	2.71	3.27	3.8
3		2,59	7,16	25,2	0	0	0	0	0	0	0	0	0	0	0	0	0	0	0	0	0	0	0	0	0	0	0	0	0	0	0	0	0	0	0	0	0	0	0	0	0.11	0.26	0.55	0.98	1.52	2.12	2.72	3.29	3.82
1	7	2,60	7,51	24,7	0	0	0	0	0	0	0	0	0	0	0	0	0	0	0	0	0	0	0	0	0	0	0	0	0	0	0	0	0	0	0	0	0.09	0.11	0.11	0.11	0.15	0.29	0.55	0.94	1.43	1.98	2.53	3.05	3.55
2		2,59	7,48	24,5	0	0	0	0	0	0	0	0	0	0	0	0	0	0	0	0	0	0	0	0	0	0	0	0	0	0	0	0	0	0	0	0.06	0.09	0.11	0.11	0.11	0.16	0.29	0.55	0.94	1.44	1.98	2.53	3.06	3.56
3		2,59	7,48	24,6	0	0	0	0	0	0	0	0	0	0	0	0	0	0	0	0	0	0	0	0	0	0	0	0	0	0	0	0	0	0	0	0.06	0.1	0.11	0.11	0.11	0.16	0.3	0.56	0.95	1.44	1.99	2.54	3.06	3.56
1	8.5	2,98	9,42	29,7	0	0	0	0	0	0	0	0	0	0	0	0	0	0	0	0	0	0	0	0	0	0	0	0	0	0	0	0	0	0	0	0	0	0	0	0	0	0.16	0.36	0.68	1.08	1.54	1.99	2.42	2.83
2		2,98	9,44	29,8	0	0	0	0	0	0	0	0	0	0	0	0	0	0	0	0	0	0	0	0	0	0	0	0	0	0	0	0	0	0	0	0	0	0	0	0	0	0.16	0.36	0.68	1.08	1.53	1.99	2.42	2.82
3		2,98	9,44	29,8	0	0	0	0	0	0	0	0	0	0	0	0	0	0	0	0	0	0	0	0	0	0	0	0	0	0	0	0	0	0	0	0	0	0	0	0	0	0.16	0.36	0.68	1.08	1.53	1.99	2.42	2.83
1	9	2,85	8,72	27,4	0	0	0	0	0	0	0	0	0	0	0	0	0	0	0	0	0	0	0	0	0	0	0	0	0	0	0	0	0	0	0	0	0	0	0	0	0.09	0.2	0.42	0.76	1.19	1.67	2.16	2.63	3.08
2		2,86	8,77	28,0	0	0	0	0	0	0	0	0	0	0	0	0	0	0	0	0	0	0	0	0	0	0	0	0	0	0	0	0	0	0	0	0	0	0	0	0	0.09	0.2	0.42	0.76	1.18	1.67	2.15	2.62	3.07
3		2,86	8,76	27,5	0	0	0	0	0	0	0	0	0	0	0	0	0	0	0	0	0	0	0	0	0	0	0	0	0	0	0	0	0	0	0	0	0	0	0	0	0.09	0.2	0.42	0.76	1.18	1.67	2.16	2.62	3.07
1	9.5	3,03	9,64	37,7	0	0	0	0	0	0	0	0	0	0	0	0	0	0	0	0	0	0	0	0	0	0	0	0	0	0	0	0	0	0	0	0	0	0	0	0	0	0.13	0.34	0.65	1.05	1.49	1.93	2.34	2.74
2		3,01	9,52	35,6	0	0	0	0	0	0	0	0	0	0	0	0	0	0	0	0	0	0	0	0	0	0	0	0	0	0	0	0	0	0	0	0	0	0	0	0	0	0.14	0.35	0.66	1.06	1.51	1.95	2.36	2.76
3		2,99	9,39	33,8	0	0	0	0	0	0	0	0	0	0	0	0	0	0	0	0	0	0	0	0	0	0	0	0	0	0	0	0	0	0	0	0	0	0	0	0	0	0.15	0.36	0.68	1.08	1.53	1.97	2.39	2.79
1	10.5	2,48	6,67	23,5	0	0	0	0	0	0	0	0	0	0	0	0	0	0	0	0	0	0	0	0	0	0	0	0	0	0	0	0	0	0	0	0	0	0.06	0.06	0.07	0.13	0.3	0.61	1.08	1.67	2.32	2.98	3.59	4.16
2		2,48	6,64	22,9	0	0	0	0	0	0	0	0	0	0	0	0	0	0	0	0	0	0	0	0	0	0	0	0	0	0	0	0	0	0	0	0	0	0.07	0.06	0.07	0.13	0.3	0.61	1.08	1.67	2.33	2.99	3.61	4.18
3		2,49	6,69	23,2	0	0	0	0	0	0	0	0	0	0	0	0	0	0	0	0	0	0	0	0	0	0	0	0	0	0	0	0	0	0	0	0	0	0	0	0.07	0.13	0.3	0.61	1.08	1.67	2.32	2.98	3.6	4.16
1	11	2,68	7,88	30,5	0	0	0	0	0	0	0	0	0	0	0	0	0	0	0	0	0	0	0	0	0	0	0	0	0	0	0	0	0	0	0	0	0	0.06	0.07	0.07	0.12	0.25	0.5	0.87	1.35	1.89	2.44	2.96	3.46
2		2,68	7,88	30,5	0	0	0	0	0	0	0	0	0	0	0	0	0	0	0	0	0	0	0	0	0	0	0	0	0	0	0	0	0	0	0	0	0	0.06	0.07	0.07	0.12	0.25	0.5	0.87	1.35	1.89	2.44	2.96	3.46
3		2,68	7,86	30,1	0	0	0	0	0	0	0	0	0	0	0	0	0	0	0	0	0	0	0	0	0	0	0	0	0	0	0	0	0	0	0	0	0	0.06	0.07	0.08	0.12	0.25	0.5	0.88	1.36	1.9	2.45	2.97	3.47
1	12	2,61	7,29	24,1	0	0	0	0	0	0	0	0	0	0	0	0	0	0	0	0	0	0	0	0	0	0	0	0	0	0	0	0	0	0	0	0	0	0	0	0	0.09	0.25	0.53	0.96	1.5	2.1	2.7	3.26	3.78
2		2,60	7,26	23,7	0	0	0	0	0	0	0	0	0	0	0	0	0	0	0	0	0	0	0	0	0	0	0	0	0	0	0	0	0	0	0	0	0	0	0	0	0.09	0.25	0.54	0.97	1.51	2.11	2.71	3.27	3.8
3		2,60	7,28	23,8	0	0	0	0	0	0	0	0	0	0	0	0	0	0	0	0	0	0	0	0	0	0	0	0	0	0	0	0	0	0	0	0	0	0	0	0	0.09	0.25	0.54	0.97	1.51	2.11	2.71	3.27	3.79
1	12.5	2,60	7,67	30,6	0	0	0	0	0	0	0	0	0	0	0	0	0	0	0	0	0	0	0	0	0	0	0	0	0	0	0	0	0	0	0	0	0.07	0.09	0.09	0.1	0.15	0.29	0.55	0.94	1.43	1.99	2.55	3.08	3.59
2		2,61	7,70	30,9	0	0	0	0	0	0	0	0	0	0	0	0	0	0	0	0	0	0	0	0	0	0	0	0	0	0	0	0	0	0	0	0	0.07	0.09	0.09	0.1	0.15	0.29	0.55	0.93	1.43	1.98	2.54	3.07	3.57
3		2,60	7,68	30,4	0	0	0	0	0	0	0	0	0	0	0	0	0	0	0	0	0	0	0	0	0	0	0	0	0	0	0	0	0	0	0	0	0.07	0.09	0.09	0.1	0.15	0.29	0.55	0.94	1.43	1.99	2.55	3.08	3.58
1	13	3,07	16,1	135	0	0	0	0	0	0	0	0	0	0	0	0	0	0	0	0	0	0	0	0	0	0	0	0	0	0	0	0	0	0	0	0.07	0.1	0.13	0.13	0.13	0.16	0.25	0.41	0.66	0.98	1.33	1.68	2	2.31
2		3,06	16,0	137	0	0	0	0	0	0	0	0	0	0	0	0	0	0	0	0	0	0	0	0	0	0	0	0	0	0	0	0	0	0	0	0.07	0.11	0.13	0.14	0.14	0.16	0.25	0.41	0.66	0.98	1.33	1.68	2.01	2.31
3		3,05	15,7	133	0	0	0	0	0	0	0	0	0	0	0	0	0	0	0	0	0	0	0	0	0	0	0	0	0	0	0	0	0	0	0	0.08	0.11	0.13	0.14	0.14	0.16	0.25	0.41	0.67	0.99	1.34	1.69	2.02	2.33
1	13.5	2,50	7,10	23,3	0	0	0	0	0	0	0	0	0	0	0	0	0	0	0	0	0	0	0	0	0	0	0	0	0	0	0	0	0	0	0	0.09	0.13	0.14	0.13	0.13	0.19	0.34	0.62	1.03	1.55	2.12	2.69	3.24	3.77
2		2,50	7,08	23,3	0	0	0	0	0	0	0	0	0	0	0	0	0	0	0	0	0	0	0	0	0	0	0	0	0	0	0	0	0	0	0	0.1	0.13	0.14	0.13	0.14	0.19	0.34	0.62	1.03	1.55	2.12	2.7	3.25	3.77
3		2,49	7,07	23,4	0	0	0	0	0	0	0	0	0	0	0	0	0	0	0	0	0	0	0	0	0	0	0	0	0	0	0	0	0	0	0.06	0.11	0.14	0.14	0.13	0.13	0.19	0.34	0.62	1.03	1.55	2.12	2.69	3.25	3.77
1	14	3,20	9,37	32,6	0	0	0	0	0	0	0	0	0	0	0	0	0	0	0	0	0	0	0	0	0	0	0	0	0	0	0	0	0	0	0	0	0	0	0	0	0	0	0.19	0.48	0.88	1.33	1.77	2.19	2.61
2		3,19	9,32	31,9	0	0	0	0	0	0	0	0	0	0	0	0	0	0	0	0	0	0	0	0	0	0	0	0	0	0	0	0	0	0	0	0	0	0	0	0	0	0	0.19	0.48	0.89	1.34	1.78	2.21	2.63
3		3,18	9,28	32,1	0	0	0	0	0	0	0	0	0	0	0	0	0	0	0	0	0	0	0	0	0	0	0	0	0	0	0	0	0	0	0	0	0	0	0	0	0	0	0.19	0.49	0.89	1.35	1.79	2.22	2.65
1	14.5	3,15	9,56	34,7	0	0	0	0	0	0	0	0	0	0	0	0	0	0	0	0	0	0	0	0	0	0	0	0	0	0	0	0	0	0	0	0	0	0	0	0	0	0.06	0.24	0.54	0.93	1.37	1.8	2.22	2.63
2		3,15	9,55	35,0	0	0	0	0	0	0	0	0	0	0	0	0	0	0	0	0	0	0	0	0	0	0	0	0	0	0	0	0	0	0	0	0	0	0	0	0	0	0.06	0.24	0.54	0.94	1.37	1.81	2.22	2.63
3		3,14	9,51	34,5	0	0	0	0	0	0	0	0	0	0	0	0	0	0	0	0	0	0	0	0	0	0	0	0	0	0	0	0	0	0	0	0	0	0	0	0	0	0.06	0.24	0.55	0.94	1.38	1.82	2.23	2.64
1	15	2,79	7,84	23,1	0	0	0	0	0	0	0	0	0	0	0	0	0	0	0	0	0	0	0	0	0	0	0	0	0	0	0	0	0	0	0	0	0	0	0	0	0.06	0.19	0.43	0.8	1.26	1.78	2.31	2.82	3.32
2		2,78	7,83	23,1	0	0	0	0	0	0	0	0	0	0	0	0	0	0	0	0	0	0	0	0	0	0	0	0	0	0	0	0	0	0	0	0	0	0	0	0	0.07	0.2	0.44	0.8	1.27	1.79	2.32	2.83	3.33
3		2,78	7,80	23,1	0	0	0	0	0	0	0	0	0	0	0	0	0	0	0	0	0	0	0	0	0	0	0	0	0	0	0	0	0	0	0	0	0	0	0	0	0.07	0.2	0.44	0.81	1.27	1.8	2.33	2.85	3.35
1	15.5	3,21	9,25	30,1	0	0	0	0	0	0	0	0	0	0	0	0	0	0	0	0	0	0	0	0	0	0	0	0	0	0	0	0	0	0	0	0	0	0	0	0	0	0	0.16	0.45	0.86	1.32	1.77	2.2	2.62
2		3,20	9,20	30,0	0	0	0	0	0	0	0	0	0	0	0	0	0	0	0	0	0	0	0	0	0	0	0	0	0	0	0	0	0	0	0	0	0	0	0	0	0	0	0.16	0.46	0.87	1.33	1.78	2.21	2.64
3		3,20	9,23	30,3	0	0	0	0	0	0	0	0	0	0	0	0	0	0	0	0	0	0	0	0	0	0	0	0	0	0	0	0	0	0	0	0	0	0	0	0	0	0	0.16	0.46	0.87	1.33	1.78	2.21	2.63
1	16	3,11	9,12	30,0	0	0	0	0	0	0	0	0	0	0	0	0	0	0	0	0	0	0	0	0	0	0	0	0	0	0	0	0	0	0	0	0	0	0	0	0	0	0	0.22	0.54	0.96	1.43	1.89	2.32	2.75
2		3,09	9,01	29,1	0	0	0	0	0	0	0	0	0	0	0	0	0	0	0	0	0	0	0	0	0	0	0	0	0	0	0	0	0	0	0	0	0	0	0	0	0	0	0.23	0.55	0.98	1.45	1.91	2.36	2.79
3		3,09	9,03	29,8	0	0	0	0	0	0	0	0	0	0	0	0	0	0	0	0	0	0	0	0	0	0	0	0	0	0	0	0	0	0	0	0	0	0	0	0	0	0	0.23	0.55	0.97	1.44	1.91	2.35	2.79
1	17	2,40	7,38	33,1	0	0	0	0	0	0	0	0	0	0	0	0	0	0	0	0	0	0	0	0	0	0	0	0	0	0	0	0	0	0.07	0.14	0.2	0.24	0.25	0.23	0.22	0.27	0.41	0.68	1.09	1.59	2.14	2.69	3.2	3.67
2		2,39	7,33	32,1	0	0	0	0	0	0	0	0	0	0	0	0	0	0	0	0	0	0	0	0	0	0	0	0	0	0	0	0	0	0.07	0.14	0.2	0.24	0.25	0.24	0.23	0.27	0.41	0.69	1.09	1.6	2.15	2.7	3.22	3.69
3		2,40	7,37	32,4	0	0	0	0	0	0	0	0	0	0	0	0	0	0	0	0	0	0	0	0	0	0	0	0	0	0	0	0	0	0.07	0.13	0.2	0.24	0.25	0.23	0.22	0.27	0.41	0.68	1.08	1.59	2.14	2.69	3.2	3.68
1	18	2,62	7,78	27,3	0	0	0	0	0	0	0	0	0	0	0	0	0	0	0	0	0	0	0	0	0	0	0	0	0	0	0	0	0	0	0	0.08	0.13	0.14	0.12	0.11	0.13	0.24	0.49	0.87	1.37	1.93	2.49	3.02	3.51
2		2,61	7,73	26,6	0	0	0	0	0	0	0	0	0	0	0	0	0	0	0	0	0	0	0	0	0	0	0	0	0	0	0	0	0	0	0	0.09	0.13	0.15	0.13	0.11	0.13	0.24	0.49	0.88	1.38	1.94	2.5	3.04	3.53
3		2,62	7,77	27,1	0	0	0	0	0	0	0	0	0	0	0	0	0	0	0	0	0	0	0	0	0	0	0	0	0	0	0	0	0	0	0	0.09	0.13	0.15	0.13	0.11	0.13	0.24	0.49	0.88	1.37	1.93	2.49	3.02	3.52
1	19	2,39	6,85	24,6	0	0	0	0	0	0	0	0	0	0	0	0	0	0	0	0	0	0	0	0	0	0	0	0	0	0	0	0	0	0.09	0.15	0.2	0.23	0.23	0.2	0.19	0.24	0.39	0.67	1.09	1.61	2.19	2.78	3.35	3.88
2		2,39	6,85	25,1	0	0	0	0	0	0	0	0	0	0	0	0	0	0	0	0	0	0	0	0	0	0	0	0	0	0	0	0	0	0.1	0.16	0.21	0.24	0.23	0.2	0.19	0.24	0.39	0.67	1.09	1.61	2.19	2.78	3.35	3.88
3		2,38	6,81	24,4	0	0	0	0	0	0	0	0	0	0	0	0	0	0	0	0	0	0	0	0	0	0	0	0	0	0	0	0	0	0.1	0.17	0.22	0.24	0.23	0.21	0.2	0.24	0.39	0.68	1.1	1.62	2.21	2.8	3.36	3.9
1	20	2,72	8,23	29,5	0	0	0	0	0	0	0	0	0	0	0	0	0	0	0	0	0	0	0	0	0	0	0	0	0	0	0	0	0	0	0	0.06	0.09	0.1	0.09	0.09	0.12	0.23	0.47	0.82	1.28	1.79	2.31	2.81	3.29
2		2,71	8,18	28,6	0	0	0	0	0	0	0	0	0	0	0	0	0	0	0	0	0	0	0	0	0	0	0	0	0	0	0	0	0	0	0	0.06	0.09	0.1	0.09	0.09	0.12	0.24	0.47	0.83	1.29	1.8	2.32	2.83	3.31
3		2,70	8,14	28,3	0	0	0	0	0	0	0	0	0	0	0	0	0	0	0	0	0	0	0	0	0	0	0	0	0	0	0	0	0	0	0	0.07	0.1	0.11	0.1	0.09	0.12	0.24	0.47	0.83	1.29	1.8	2.33	2.84	3.32
1	21	2,46	7,07	29,2	0	0	0	0	0	0	0	0	0	0	0	0	0	0	0	0	0	0	0	0	0	0	0	0	0	0	0	0	0	0	0.1	0.16	0.2	0.21	0.19	0.17	0.2	0.33	0.6	1.02	1.54	2.12	2.7	3.26	3.78
2		2,48	7,22	36,8	0	0	0	0	0	0	0	0	0	0	0	0	0	0	0	0	0	0	0	0	0	0	0	0	0	0	0	0	0	0	0.1	0.16	0.2	0.21	0.18	0.17	0.2	0.33	0.6	1	1.51	2.08	2.65	3.2	3.71
3		2,46	7,10	30,7	0	0	0	0	0	0	0	0	0	0	0	0	0	0	0	0	0	0	0	0	0	0	0	0	0	0	0	0	0	0	0.1	0.16	0.2	0.21	0.19	0.17	0.2	0.34	0.61	1.02	1.54	2.11	2.69	3.25	3.77
1	22	2,69	7,50	26,0	0	0	0	0	0	0	0	0	0	0	0	0	0	0	0	0	0	0	0	0	0	0	0	0	0	0	0	0	0	0	0	0	0	0	0	0	0.08	0.21	0.47	0.86	1.37	1.94	2.52	3.07	3.6
2		2,68	7,42	25,3	0	0	0	0	0	0	0	0	0	0	0	0	0	0	0	0	0	0	0	0	0	0	0	0	0	0	0	0	0	0	0	0	0	0	0	0	0.09	0.22	0.48	0.88	1.39	1.97	2.55	3.11	3.64
3		2,67	7,41	25,4	0	0	0	0	0	0	0	0	0	0	0	0	0	0	0	0	0	0	0	0	0	0	0	0	0	0	0	0	0	0	0	0	0	0	0	0	0.09	0.22	0.48	0.88	1.4	1.97	2.56	3.12	3.65
1	23	2,34	6,35	20,6	0	0	0	0	0	0	0	0	0	0	0	0	0	0	0	0	0	0	0	0	0	0	0	0	0	0	0	0	0	0.09	0.15	0.2	0.21	0.2	0.17	0.16	0.21	0.38	0.7	1.16	1.73	2.37	3.02	3.65	4.23
2		2,34	6,35	20,8	0	0	0	0	0	0	0	0	0	0	0	0	0	0	0	0	0	0	0	0	0	0	0	0	0	0	0	0	0	0.09	0.15	0.19	0.21	0.2	0.17	0.16	0.22	0.39	0.7	1.16	1.74	2.38	3.03	3.65	4.23
3		2,33	6,28	20,0	0	0	0	0	0	0	0	0	0	0	0	0	0	0	0	0	0	0	0	0	0	0	0	0	0	0	0	0	0	0.1	0.16	0.2	0.22	0.21	0.18	0.17	0.22	0.4	0.71	1.18	1.76	2.4	3.06	3.68	4.28
1	24	2,50	7,25	31,2	0	0	0	0	0	0	0	0	0	0	0	0	0	0	0	0	0	0	0	0	0	0	0	0	0	0	0	0	0	0.07	0.12	0.15	0.16	0.15	0.13	0.13	0.18	0.33	0.6	1	1.49	2.05	2.62	3.17	3.7
2		2,49	7,20	30,6	0	0	0	0	0	0	0	0	0	0	0	0	0	0	0	0	0	0	0	0	0	0	0	0	0	0	0	0	0	0.08	0.13	0.16	0.17	0.16	0.13	0.13	0.18	0.34	0.61	1.01	1.51	2.07	2.64	3.19	3.72
3		2,47	7,13	29,2	0	0	0	0	0	0	0	0	0	0	0	0	0	0	0	0	0	0	0	0	0	0	0	0	0	0	0	0	0	0.09	0.14	0.17	0.18	0.16	0.14	0.13	0.19	0.34	0.62	1.02	1.53	2.09	2.66	3.22	3.75
1	25	2,59	7,72	24,8	0	0	0	0	0	0	0	0	0	0	0	0	0	0	0	0	0	0	0	0	0	0	0	0	0	0	0	0	0	0	0	0.07	0.12	0.14	0.13	0.11	0.13	0.25	0.5	0.9	1.42	2	2.57	3.11	3.6
2		2,60	7,74	25,0	0	0	0	0	0	0	0	0	0	0	0	0	0	0	0	0	0	0	0	0	0	0	0	0	0	0	0	0	0	0	0	0.07	0.12	0.14	0.13	0.11	0.13	0.25	0.5	0.9	1.41	1.99	2.56	3.09	3.58
3		2,59	7,68	24,2	0	0	0	0	0	0	0	0	0	0	0	0	0	0	0	0	0	0	0	0	0	0	0	0	0	0	0	0	0	0	0	0.08	0.13	0.15	0.14	0.11	0.13	0.25	0.5	0.9	1.42	2	2.58	3.12	3.61
1	26	2,62	7,66	31,3	0	0	0	0	0	0	0	0	0	0	0	0	0	0	0	0	0	0	0	0	0	0	0	0	0	0	0	0	0	0	0	0	0.09	0.11	0.1	0.1	0.14	0.27	0.53	0.91	1.4	1.94	2.5	3.02	3.52
2		2,60	7,53	29,1	0	0	0	0	0	0	0	0	0	0	0	0	0	0	0	0	0	0	0	0	0	0	0	0	0	0	0	0	0	0	0	0.07	0.1	0.11	0.11	0.11	0.15	0.28	0.54	0.93	1.42	1.97	2.53	3.06	3.57
3		2,59	7,49	28,7	0	0	0	0	0	0	0	0	0	0	0	0	0	0	0	0	0	0	0	0	0	0	0	0	0	0	0	0	0	0	0	0.07	0.1	0.12	0.11	0.11	0.15	0.28	0.54	0.93	1.43	1.99	2.55	3.08	3.59
1	27	2,53	7,56	33,9	0	0	0	0	0	0	0	0	0	0	0	0	0	0	0	0	0	0	0	0	0	0	0	0	0	0	0	0	0	0	0	0.1	0.14	0.14	0.13	0.13	0.18	0.32	0.59	1	1.5	2.06	2.61	3.13	3.61
2		2,50	7,38	29,7	0	0	0	0	0	0	0	0	0	0	0	0	0	0	0	0	0	0	0	0	0	0	0	0	0	0	0	0	0	0	0.07	0.11	0.15	0.16	0.14	0.14	0.19	0.33	0.61	1.02	1.54	2.1	2.66	3.19	3.68
3		2,49	7,35	29,6	0	0	0	0	0	0	0	0	0	0	0	0	0	0	0	0	0	0	0	0	0	0	0	0	0	0	0	0	0	0	0.07	0.12	0.16	0.16	0.15	0.15	0.19	0.34	0.62	1.03	1.54	2.11	2.67	3.2	3.69
1	27.5	2,78	8,10	27,8	0	0	0	0	0	0	0	0	0	0	0	0	0	0	0	0	0	0	0	0	0	0	0	0	0	0	0	0	0	0	0	0	0	0	0	0	0.09	0.23	0.47	0.83	1.28	1.78	2.29	2.79	3.28
2		2,78	8,18	29,7	0	0	0	0	0	0	0	0	0	0	0	0	0	0	0	0	0	0	0	0	0	0	0	0	0	0	0	0	0	0	0	0	0	0	0	0	0.09	0.23	0.47	0.82	1.27	1.77	2.28	2.77	3.25
3		2,77	8,05	27,5	0	0	0	0	0	0	0	0	0	0	0	0	0	0	0	0	0	0	0	0	0	0	0	0	0	0	0	0	0	0	0	0	0	0	0	0	0.09	0.23	0.48	0.84	1.29	1.79	2.31	2.81	3.3
1	28	2,82	8,16	32,3	0	0	0	0	0	0	0	0	0	0	0	0	0	0	0	0	0	0	0	0	0	0	0	0	0	0	0	0	0	0	0	0	0	0	0	0	0	0.13	0.37	0.75	1.24	1.77	2.31	2.81	3.29
2		2,79	7,96	28,4	0	0	0	0	0	0	0	0	0	0	0	0	0	0	0	0	0	0	0	0	0	0	0	0	0	0	0	0	0	0	0	0	0	0	0	0	0	0.14	0.39	0.78	1.27	1.82	2.37	2.88	3.37
3		2,78	7,90	27,5	0	0	0	0	0	0	0	0	0	0	0	0	0	0	0	0	0	0	0	0	0	0	0	0	0	0	0	0	0	0	0	0	0	0	0	0	0	0.14	0.4	0.79	1.28	1.83	2.38	2.9	3.4
1	29	2,80	7,96	29,1	0	0	0	0	0	0	0	0	0	0	0	0	0	0	0	0	0	0	0	0	0	0	0	0	0	0	0	0	0	0	0	0	0	0	0	0	0	0.15	0.4	0.77	1.25	1.79	2.33	2.84	3.33
2		2,76	7,69	24,8	0	0	0	0	0	0	0	0	0	0	0	0	0	0	0	0	0	0	0	0	0	0	0	0	0	0	0	0	0	0	0	0	0	0	0	0	0	0.16	0.42	0.81	1.3	1.85	2.41	2.93	3.44
3		2,75	7,64	24,4	0	0	0	0	0	0	0	0	0	0	0	0	0	0	0	0	0	0	0	0	0	0	0	0	0	0	0	0	0	0	0	0	0	0	0	0	0	0.17	0.43	0.82	1.32	1.87	2.42	2.96	3.47
1	30	2,87	8,10	27,4	0	0	0	0	0	0	0	0	0	0	0	0	0	0	0	0	0	0	0	0	0	0	0	0	0	0	0	0	0	0	0	0	0	0	0	0	0	0.09	0.32	0.69	1.17	1.7	2.23	2.73	3.22
2		2,85	7,97	25,6	0	0	0	0	0	0	0	0	0	0	0	0	0	0	0	0	0	0	0	0	0	0	0	0	0	0	0	0	0	0	0	0	0	0	0	0	0	0.1	0.33	0.71	1.19	1.72	2.26	2.77	3.27
3		2,84	7,89	24,7	0	0	0	0	0	0	0	0	0	0	0	0	0	0	0	0	0	0	0	0	0	0	0	0	0	0	0	0	0	0	0	0	0	0	0	0	0	0.11	0.34	0.72	1.2	1.75	2.29	2.8	3.3
1	30.5	2,83	8,10	23,7	0	0	0	0	0	0	0	0	0	0	0	0	0	0	0	0	0	0	0	0	0	0	0	0	0	0	0	0	0	0	0	0	0	0	0	0	0	0.1	0.33	0.72	1.21	1.76	2.32	2.83	3.32
2		2,83	8,09	23,7	0	0	0	0	0	0	0	0	0	0	0	0	0	0	0	0	0	0	0	0	0	0	0	0	0	0	0	0	0	0	0	0	0	0	0	0	0	0.1	0.34	0.72	1.22	1.77	2.32	2.84	3.33
3		2,83	8,11	23,8	0	0	0	0	0	0	0	0	0	0	0	0	0	0	0	0	0	0	0	0	0	0	0	0	0	0	0	0	0	0	0	0	0	0	0	0	0	0.1	0.34	0.72	1.22	1.77	2.32	2.83	3.32
1	31	2,68	7,33	22,6	0	0	0	0	0	0	0	0	0	0	0	0	0	0	0	0	0	0	0	0	0	0	0	0	0	0	0	0	0	0	0	0	0	0	0	0	0.08	0.23	0.49	0.89	1.39	1.96	2.53	3.09	3.62
2		2,67	7,28	22,0	0	0	0	0	0	0	0	0	0	0	0	0	0	0	0	0	0	0	0	0	0	0	0	0	0	0	0	0	0	0	0	0	0	0	0	0	0.08	0.23	0.5	0.9	1.4	1.97	2.55	3.11	3.65
3		2,67	7,28	22,1	0	0	0	0	0	0	0	0	0	0	0	0	0	0	0	0	0	0	0	0	0	0	0	0	0	0	0	0	0	0	0	0	0	0	0	0	0.08	0.23	0.5	0.9	1.4	1.97	2.55	3.11	3.65
1	32	2,77	7,66	23,3	0	0	0	0	0	0	0	0	0	0	0	0	0	0	0	0	0	0	0	0	0	0	0	0	0	0	0	0	0	0	0	0	0	0	0	0	0	0.12	0.37	0.77	1.28	1.85	2.41	2.94	3.45
2		2,76	7,60	22,9	0	0	0	0	0	0	0	0	0	0	0	0	0	0	0	0	0	0	0	0	0	0	0	0	0	0	0	0	0	0	0	0	0	0	0	0	0	0.13	0.38	0.79	1.3	1.86	2.43	2.97	3.48
3		2,76	7,57	22,7	0	0	0	0	0	0	0	0	0	0	0	0	0	0	0	0	0	0	0	0	0	0	0	0	0	0	0	0	0	0	0	0	0	0	0	0	0	0.13	0.39	0.79	1.31	1.88	2.44	2.98	3.5
1	33	2,67	7,49	24,2	0	0	0	0	0	0	0	0	0	0	0	0	0	0	0	0	0	0	0	0	0	0	0	0	0	0	0	0	0	0	0	0	0	0	0	0	0.09	0.23	0.5	0.9	1.41	1.98	2.54	3.07	3.58
2		2,64	7,34	22,6	0	0	0	0	0	0	0	0	0	0	0	0	0	0	0	0	0	0	0	0	0	0	0	0	0	0	0	0	0	0	0	0	0	0	0	0	0.1	0.25	0.52	0.93	1.45	2.03	2.6	3.14	3.65
3		2,63	7,30	22,3	0	0	0	0	0	0	0	0	0	0	0	0	0	0	0	0	0	0	0	0	0	0	0	0	0	0	0	0	0	0	0	0	0	0	0	0	0.1	0.25	0.53	0.94	1.46	2.04	2.62	3.16	3.68
1	34	2,69	7,54	26,5	0	0	0	0	0	0	0	0	0	0	0	0	0	0	0	0	0	0	0	0	0	0	0	0	0	0	0	0	0	0	0	0	0	0	0	0	0.08	0.23	0.49	0.88	1.37	1.92	2.49	3.03	3.56
2		2,67	7,43	24,9	0	0	0	0	0	0	0	0	0	0	0	0	0	0	0	0	0	0	0	0	0	0	0	0	0	0	0	0	0	0	0	0	0	0	0	0	0.09	0.24	0.5	0.9	1.39	1.95	2.52	3.08	3.61
3		2,67	7,39	24,7	0	0	0	0	0	0	0	0	0	0	0	0	0	0	0	0	0	0	0	0	0	0	0	0	0	0	0	0	0	0	0	0	0	0	0	0	0.09	0.24	0.51	0.9	1.4	1.97	2.54	3.09	3.63
1	34.5	2,60	7,32	22,8	0	0	0	0	0	0	0	0	0	0	0	0	0	0	0	0	0	0	0	0	0	0	0	0	0	0	0	0	0	0	0	0	0	0.06	0.06	0.07	0.12	0.27	0.54	0.95	1.46	2.03	2.61	3.17	3.7
2		2,60	7,31	22,7	0	0	0	0	0	0	0	0	0	0	0	0	0	0	0	0	0	0	0	0	0	0	0	0	0	0	0	0	0	0	0	0	0	0.06	0.06	0.07	0.13	0.28	0.55	0.95	1.47	2.04	2.62	3.18	3.71
3		2,60	7,32	22,9	0	0	0	0	0	0	0	0	0	0	0	0	0	0	0	0	0	0	0	0	0	0	0	0	0	0	0	0	0	0	0	0	0	0.07	0.07	0.07	0.13	0.28	0.55	0.96	1.47	2.04	2.62	3.17	3.7
1	35	2,64	7,74	24,0	0	0	0	0	0	0	0	0	0	0	0	0	0	0	0	0	0	0	0	0	0	0	0	0	0	0	0	0	0	0	0	0	0.06	0.08	0.08	0.09	0.14	0.28	0.53	0.91	1.39	1.92	2.46	2.97	3.46
2		2,64	7,74	23,9	0	0	0	0	0	0	0	0	0	0	0	0	0	0	0	0	0	0	0	0	0	0	0	0	0	0	0	0	0	0	0	0	0.06	0.08	0.09	0.1	0.15	0.28	0.54	0.91	1.39	1.92	2.46	2.97	3.46
3		2,64	7,77	24,0	0	0	0	0	0	0	0	0	0	0	0	0	0	0	0	0	0	0	0	0	0	0	0	0	0	0	0	0	0	0	0	0	0.07	0.09	0.09	0.1	0.15	0.28	0.53	0.91	1.39	1.92	2.45	2.97	3.45
1	35.5	2,74	7,77	23,8	0	0	0	0	0	0	0	0	0	0	0	0	0	0	0	0	0	0	0	0	0	0	0	0	0	0	0	0	0	0	0	0	0	0	0	0	0	0.18	0.44	0.84	1.34	1.89	2.44	2.96	3.46
2		2,73	7,77	23,4	0	0	0	0	0	0	0	0	0	0	0	0	0	0	0	0	0	0	0	0	0	0	0	0	0	0	0	0	0	0	0	0	0	0	0	0	0	0.19	0.45	0.85	1.35	1.9	2.46	2.98	3.47
3		2,72	7,72	22,8	0	0	0	0	0	0	0	0	0	0	0	0	0	0	0	0	0	0	0	0	0	0	0	0	0	0	0	0	0	0	0	0	0	0	0	0	0	0.2	0.46	0.86	1.36	1.92	2.48	3	3.49
1	36	2,95	8,60	23,8	0	0	0	0	0	0	0	0	0	0	0	0	0	0	0	0	0	0	0	0	0	0	0	0	0	0	0	0	0	0	0	0	0	0	0	0	0	0.08	0.3	0.65	1.1	1.6	2.09	2.55	2.99
2		2,95	8,61	23,7	0	0	0	0	0	0	0	0	0	0	0	0	0	0	0	0	0	0	0	0	0	0	0	0	0	0	0	0	0	0	0	0	0	0	0	0	0	0.08	0.3	0.65	1.1	1.6	2.09	2.55	2.99
3		2,95	8,65	23,9	0	0	0	0	0	0	0	0	0	0	0	0	0	0	0	0	0	0	0	0	0	0	0	0	0	0	0	0	0	0	0	0	0	0	0	0	0	0.08	0.3	0.65	1.1	1.6	2.09	2.55	2.98
1	37	2,64	7,21	21,9	0	0	0	0	0	0	0	0	0	0	0	0	0	0	0	0	0	0	0	0	0	0	0	0	0	0	0	0	0	0	0	0	0	0	0	0	0.09	0.24	0.52	0.93	1.45	2.03	2.61	3.17	3.7
2		2,63	7,17	21,5	0	0	0	0	0	0	0	0	0	0	0	0	0	0	0	0	0	0	0	0	0	0	0	0	0	0	0	0	0	0	0	0	0	0	0	0	0.09	0.24	0.52	0.93	1.46	2.04	2.63	3.19	3.73
3		2,63	7,18	21,6	0	0	0	0	0	0	0	0	0	0	0	0	0	0	0	0	0	0	0	0	0	0	0	0	0	0	0	0	0	0	0	0	0	0	0	0	0.1	0.25	0.52	0.94	1.46	2.04	2.63	3.19	3.73
1	38	2,75	7,82	25,7	0	0	0	0	0	0	0	0	0	0	0	0	0	0	0	0	0	0	0	0	0	0	0	0	0	0	0	0	0	0	0	0	0	0	0	0	0.09	0.22	0.47	0.84	1.31	1.84	2.37	2.89	3.39
2		2,74	7,77	25,4	0	0	0	0	0	0	0	0	0	0	0	0	0	0	0	0	0	0	0	0	0	0	0	0	0	0	0	0	0	0	0	0	0	0	0	0	0.09	0.23	0.48	0.85	1.32	1.85	2.39	2.91	3.41
3		2,73	7,70	24,5	0	0	0	0	0	0	0	0	0	0	0	0	0	0	0	0	0	0	0	0	0	0	0	0	0	0	0	0	0	0	0	0	0	0	0	0	0.1	0.23	0.48	0.86	1.33	1.87	2.41	2.93	3.44
1	39	2,81	8,00	27,1	0	0	0	0	0	0	0	0	0	0	0	0	0	0	0	0	0	0	0	0	0	0	0	0	0	0	0	0	0	0	0	0	0	0	0	0	0	0.1	0.35	0.74	1.24	1.8	2.34	2.85	3.33
2		2,79	7,83	25,3	0	0	0	0	0	0	0	0	0	0	0	0	0	0	0	0	0	0	0	0	0	0	0	0	0	0	0	0	0	0	0	0	0	0	0	0	0	0.11	0.36	0.76	1.27	1.84	2.4	2.92	3.41
3		2,78	7,82	25,3	0	0	0	0	0	0	0	0	0	0	0	0	0	0	0	0	0	0	0	0	0	0	0	0	0	0	0	0	0	0	0	0	0	0	0	0	0	0.12	0.37	0.77	1.28	1.85	2.4	2.92	3.42
1	40	2,64	7,50	27,2	0	0	0	0	0	0	0	0	0	0	0	0	0	0	0	0	0	0	0	0	0	0	0	0	0	0	0	0	0	0	0	0	0.06	0.07	0.06	0.06	0.11	0.25	0.51	0.9	1.4	1.96	2.52	3.07	3.59
2		2,63	7,45	26,6	0	0	0	0	0	0	0	0	0	0	0	0	0	0	0	0	0	0	0	0	0	0	0	0	0	0	0	0	0	0	0	0	0.06	0.07	0.07	0.07	0.11	0.25	0.52	0.91	1.41	1.97	2.54	3.09	3.61
3		2,62	7,41	26,3	0	0	0	0	0	0	0	0	0	0	0	0	0	0	0	0	0	0	0	0	0	0	0	0	0	0	0	0	0	0	0	0	0.07	0.08	0.07	0.07	0.12	0.26	0.52	0.92	1.42	1.98	2.55	3.1	3.63
1	41	2,90	8,31	31,6	0	0	0	0	0	0	0	0	0	0	0	0	0	0	0	0	0	0	0	0	0	0	0	0	0	0	0	0	0	0	0	0	0	0	0	0	0	0.1	0.32	0.68	1.14	1.65	2.17	2.66	3.14
2		2,89	8,26	30,7	0	0	0	0	0	0	0	0	0	0	0	0	0	0	0	0	0	0	0	0	0	0	0	0	0	0	0	0	0	0	0	0	0	0	0	0	0	0.1	0.32	0.68	1.15	1.66	2.18	2.68	3.16
3		2,89	8,24	30,6	0	0	0	0	0	0	0	0	0	0	0	0	0	0	0	0	0	0	0	0	0	0	0	0	0	0	0	0	0	0	0	0	0	0	0	0	0	0.1	0.33	0.69	1.15	1.67	2.19	2.68	3.17
1	42	2,88	8,58	40,1	0	0	0	0	0	0	0	0	0	0	0	0	0	0	0	0	0	0	0	0	0	0	0	0	0	0	0	0	0	0	0	0	0	0	0	0	0	0.16	0.38	0.73	1.17	1.66	2.16	2.64	3.1
2		2,84	8,30	32,7	0	0	0	0	0	0	0	0	0	0	0	0	0	0	0	0	0	0	0	0	0	0	0	0	0	0	0	0	0	0	0	0	0	0	0	0	0	0.17	0.4	0.75	1.21	1.71	2.23	2.72	3.19
3		2,83	8,20	31,0	0	0	0	0	0	0	0	0	0	0	0	0	0	0	0	0	0	0	0	0	0	0	0	0	0	0	0	0	0	0	0	0	0	0	0	0	0	0.17	0.41	0.76	1.22	1.73	2.25	2.75	3.23
1	43	2,86	8,33	24,2	0	0	0	0	0	0	0	0	0	0	0	0	0	0	0	0	0	0	0	0	0	0	0	0	0	0	0	0	0	0	0	0	0	0	0	0	0	0.08	0.3	0.68	1.17	1.72	2.27	2.77	3.24
2		2,85	8,28	23,6	0	0	0	0	0	0	0	0	0	0	0	0	0	0	0	0	0	0	0	0	0	0	0	0	0	0	0	0	0	0	0	0	0	0	0	0	0	0.08	0.31	0.69	1.18	1.74	2.28	2.79	3.26
3		2,86	8,37	24,3	0	0	0	0	0	0	0	0	0	0	0	0	0	0	0	0	0	0	0	0	0	0	0	0	0	0	0	0	0	0	0	0	0	0	0	0	0	0.08	0.3	0.68	1.17	1.72	2.26	2.76	3.23
1	44	2,65	7,55	26,6	0	0	0	0	0	0	0	0	0	0	0	0	0	0	0	0	0	0	0	0	0	0	0	0	0	0	0	0	0	0	0	0	0	0.07	0.07	0.07	0.12	0.25	0.51	0.9	1.39	1.94	2.5	3.03	3.54
2		2,65	7,56	27,1	0	0	0	0	0	0	0	0	0	0	0	0	0	0	0	0	0	0	0	0	0	0	0	0	0	0	0	0	0	0	0	0	0	0.07	0.07	0.07	0.12	0.25	0.51	0.89	1.39	1.94	2.5	3.03	3.53
3		2,64	7,49	25,9	0	0	0	0	0	0	0	0	0	0	0	0	0	0	0	0	0	0	0	0	0	0	0	0	0	0	0	0	0	0	0	0	0	0.07	0.07	0.08	0.12	0.26	0.52	0.91	1.41	1.96	2.52	3.06	3.57
1	45	2,62	7,39	22,5	0	0	0	0	0	0	0	0	0	0	0	0	0	0	0	0	0	0	0	0	0	0	0	0	0	0	0	0	0	0	0	0	0.07	0.09	0.09	0.09	0.13	0.26	0.52	0.91	1.41	1.97	2.53	3.07	3.58
2		2,62	7,40	23,1	0	0	0	0	0	0	0	0	0	0	0	0	0	0	0	0	0	0	0	0	0	0	0	0	0	0	0	0	0	0	0	0	0.07	0.09	0.09	0.09	0.13	0.26	0.52	0.91	1.41	1.97	2.53	3.07	3.58
3		2,61	7,34	22,4	0	0	0	0	0	0	0	0	0	0	0	0	0	0	0	0	0	0	0	0	0	0	0	0	0	0	0	0	0	0	0	0	0.08	0.1	0.09	0.09	0.13	0.26	0.53	0.92	1.43	1.99	2.55	3.09	3.61
1	46.5	2,81	7,84	24,0	0	0	0	0	0	0	0	0	0	0	0	0	0	0	0	0	0	0	0	0	0	0	0	0	0	0	0	0	0	0	0	0	0	0	0	0	0	0.13	0.37	0.75	1.24	1.78	2.32	2.84	3.34
2		2,81	7,86	24,5	0	0	0	0	0	0	0	0	0	0	0	0	0	0	0	0	0	0	0	0	0	0	0	0	0	0	0	0	0	0	0	0	0	0	0	0	0	0.13	0.38	0.75	1.24	1.78	2.32	2.84	3.34
3		2,81	7,84	24,2	0	0	0	0	0	0	0	0	0	0	0	0	0	0	0	0	0	0	0	0	0	0	0	0	0	0	0	0	0	0	0	0	0	0	0	0	0	0.13	0.38	0.76	1.24	1.78	2.32	2.84	3.34
1	47.5	2,69	7,48	23,8	0	0	0	0	0	0	0	0	0	0	0	0	0	0	0	0	0	0	0	0	0	0	0	0	0	0	0	0	0	0	0	0	0	0	0	0	0.09	0.22	0.48	0.87	1.37	1.93	2.5	3.04	3.56
2		2,69	7,47	23,8	0	0	0	0	0	0	0	0	0	0	0	0	0	0	0	0	0	0	0	0	0	0	0	0	0	0	0	0	0	0	0	0	0	0	0	0	0.09	0.22	0.48	0.88	1.38	1.94	2.51	3.05	3.57
3		2,68	7,40	23,1	0	0	0	0	0	0	0	0	0	0	0	0	0	0	0	0	0	0	0	0	0	0	0	0	0	0	0	0	0	0	0	0	0	0	0	0	0.09	0.23	0.49	0.89	1.39	1.95	2.52	3.07	3.6
1	49	2,61	7,36	26,2	0	0	0	0	0	0	0	0	0	0	0	0	0	0	0	0	0	0	0	0	0	0	0	0	0	0	0	0	0	0	0	0	0.07	0.09	0.08	0.08	0.12	0.25	0.52	0.92	1.43	2.01	2.58	3.13	3.65
2		2,60	7,32	25,6	0	0	0	0	0	0	0	0	0	0	0	0	0	0	0	0	0	0	0	0	0	0	0	0	0	0	0	0	0	0	0	0	0.08	0.09	0.09	0.08	0.12	0.25	0.52	0.92	1.44	2.02	2.6	3.15	3.67
3		2,60	7,35	26,6	0	0	0	0	0	0	0	0	0	0	0	0	0	0	0	0	0	0	0	0	0	0	0	0	0	0	0	0	0	0	0	0	0.08	0.09	0.09	0.08	0.12	0.26	0.52	0.92	1.44	2.01	2.59	3.14	3.66
1	50	2,69	7,71	25,6	0	0	0	0	0	0	0	0	0	0	0	0	0	0	0	0	0	0	0	0	0	0	0	0	0	0	0	0	0	0	0	0	0	0	0	0.06	0.11	0.24	0.5	0.88	1.37	1.91	2.46	2.98	3.47
2		2,68	7,69	25,5	0	0	0	0	0	0	0	0	0	0	0	0	0	0	0	0	0	0	0	0	0	0	0	0	0	0	0	0	0	0	0	0	0	0	0	0.07	0.11	0.24	0.5	0.89	1.38	1.92	2.47	2.99	3.48
3		2,67	7,66	25,5	0	0	0	0	0	0	0	0	0	0	0	0	0	0	0	0	0	0	0	0	0	0	0	0	0	0	0	0	0	0	0	0	0	0.06	0.06	0.07	0.11	0.25	0.5	0.89	1.38	1.93	2.47	2.99	3.49
1	51	2,73	7,67	24,2	0	0	0	0	0	0	0	0	0	0	0	0	0	0	0	0	0	0	0	0	0	0	0	0	0	0	0	0	0	0	0	0	0	0	0	0	0	0.18	0.45	0.85	1.35	1.9	2.45	2.97	3.47
2		2,73	7,65	24,1	0	0	0	0	0	0	0	0	0	0	0	0	0	0	0	0	0	0	0	0	0	0	0	0	0	0	0	0	0	0	0	0	0	0	0	0	0	0.19	0.46	0.85	1.35	1.9	2.46	2.98	3.49
3		2,72	7,63	24,0	0	0	0	0	0	0	0	0	0	0	0	0	0	0	0	0	0	0	0	0	0	0	0	0	0	0	0	0	0	0	0	0	0	0	0	0	0	0.19	0.46	0.85	1.36	1.91	2.47	3	3.5
1	52	2,72	7,44	21,7	0	0	0	0	0	0	0	0	0	0	0	0	0	0	0	0	0	0	0	0	0	0	0	0	0	0	0	0	0	0	0	0	0	0	0	0	0	0.15	0.42	0.83	1.35	1.93	2.51	3.05	3.57
2		2,71	7,43	21,8	0	0	0	0	0	0	0	0	0	0	0	0	0	0	0	0	0	0	0	0	0	0	0	0	0	0	0	0	0	0	0	0	0	0	0	0	0	0.16	0.43	0.84	1.36	1.94	2.52	3.06	3.58
3		2,71	7,41	21,7	0	0	0	0	0	0	0	0	0	0	0	0	0	0	0	0	0	0	0	0	0	0	0	0	0	0	0	0	0	0	0	0	0	0	0	0	0	0.16	0.43	0.84	1.37	1.95	2.52	3.07	3.59
1	53	2,72	8,00	23,9	0	0	0	0	0	0	0	0	0	0	0	0	0	0	0	0	0	0	0	0	0	0	0	0	0	0	0	0	0	0	0	0	0	0	0	0	0.08	0.22	0.47	0.86	1.35	1.89	2.44	2.96	3.43
2		2,72	8,03	24,1	0	0	0	0	0	0	0	0	0	0	0	0	0	0	0	0	0	0	0	0	0	0	0	0	0	0	0	0	0	0	0	0	0	0	0	0	0.09	0.22	0.48	0.86	1.35	1.89	2.44	2.95	3.43
3		2,72	8,08	24,4	0	0	0	0	0	0	0	0	0	0	0	0	0	0	0	0	0	0	0	0	0	0	0	0	0	0	0	0	0	0	0	0	0	0	0	0	0.09	0.22	0.47	0.85	1.34	1.88	2.43	2.94	3.41
1	54	2,70	7,55	23,4	0	0	0	0	0	0	0	0	0	0	0	0	0	0	0	0	0	0	0	0	0	0	0	0	0	0	0	0	0	0	0	0	0	0	0	0	0.08	0.22	0.48	0.87	1.37	1.92	2.48	3.01	3.52
2		2,70	7,54	23,4	0	0	0	0	0	0	0	0	0	0	0	0	0	0	0	0	0	0	0	0	0	0	0	0	0	0	0	0	0	0	0	0	0	0	0	0	0.08	0.22	0.48	0.88	1.38	1.93	2.49	3.02	3.53
3		2,70	7,57	23,9	0	0	0	0	0	0	0	0	0	0	0	0	0	0	0	0	0	0	0	0	0	0	0	0	0	0	0	0	0	0	0	0	0	0	0	0	0.08	0.22	0.48	0.87	1.37	1.93	2.48	3.01	3.51
1	55	2,77	8,02	29,3	0	0	0	0	0	0	0	0	0	0	0	0	0	0	0	0	0	0	0	0	0	0	0	0	0	0	0	0	0	0	0	0	0	0	0	0	0.07	0.21	0.45	0.82	1.29	1.8	2.33	2.83	3.31
2		2,77	7,99	29,0	0	0	0	0	0	0	0	0	0	0	0	0	0	0	0	0	0	0	0	0	0	0	0	0	0	0	0	0	0	0	0	0	0	0	0	0	0.07	0.21	0.46	0.83	1.29	1.81	2.34	2.84	3.32
3		2,77	8,01	29,9	0	0	0	0	0	0	0	0	0	0	0	0	0	0	0	0	0	0	0	0	0	0	0	0	0	0	0	0	0	0	0	0	0	0	0	0	0.08	0.21	0.46	0.83	1.29	1.81	2.33	2.84	3.32
1	56	2,92	8,48	28,1	0	0	0	0	0	0	0	0	0	0	0	0	0	0	0	0	0	0	0	0	0	0	0	0	0	0	0	0	0	0	0	0	0	0	0	0	0	0.1	0.33	0.68	1.12	1.62	2.11	2.58	3.04
2		2,92	8,43	27,4	0	0	0	0	0	0	0	0	0	0	0	0	0	0	0	0	0	0	0	0	0	0	0	0	0	0	0	0	0	0	0	0	0	0	0	0	0	0.11	0.33	0.68	1.13	1.63	2.12	2.6	3.06
3		2,91	8,42	27,6	0	0	0	0	0	0	0	0	0	0	0	0	0	0	0	0	0	0	0	0	0	0	0	0	0	0	0	0	0	0	0	0	0	0	0	0	0	0.11	0.33	0.69	1.14	1.63	2.13	2.61	3.07
1	57	2,73	7,64	24,2	0	0	0	0	0	0	0	0	0	0	0	0	0	0	0	0	0	0	0	0	0	0	0	0	0	0	0	0	0	0	0	0	0	0	0	0	0	0.19	0.45	0.84	1.34	1.9	2.45	2.98	3.49
2		2,73	7,66	24,6	0	0	0	0	0	0	0	0	0	0	0	0	0	0	0	0	0	0	0	0	0	0	0	0	0	0	0	0	0	0	0	0	0	0	0	0	0	0.19	0.45	0.84	1.34	1.89	2.45	2.98	3.48
3		2,73	7,62	24,3	0	0	0	0	0	0	0	0	0	0	0	0	0	0	0	0	0	0	0	0	0	0	0	0	0	0	0	0	0	0	0	0	0	0	0	0	0	0.19	0.46	0.85	1.35	1.91	2.46	2.99	3.5
1	58	2,81	8,05	26,9	0	0	0	0	0	0	0	0	0	0	0	0	0	0	0	0	0	0	0	0	0	0	0	0	0	0	0	0	0	0	0	0	0	0	0	0	0	0.16	0.4	0.77	1.24	1.76	2.29	2.78	3.26
2		2,81	8,03	26,9	0	0	0	0	0	0	0	0	0	0	0	0	0	0	0	0	0	0	0	0	0	0	0	0	0	0	0	0	0	0	0	0	0	0	0	0	0	0.17	0.41	0.78	1.25	1.77	2.3	2.79	3.27
3		2,80	7,98	26,2	0	0	0	0	0	0	0	0	0	0	0	0	0	0	0	0	0	0	0	0	0	0	0	0	0	0	0	0	0	0	0	0	0	0	0	0	0	0.17	0.41	0.78	1.26	1.78	2.31	2.81	3.29
1	59	2,58	7,41	25,7	0	0	0	0	0	0	0	0	0	0	0	0	0	0	0	0	0	0	0	0	0	0	0	0	0	0	0	0	0	0	0	0	0.08	0.1	0.1	0.11	0.16	0.3	0.56	0.96	1.46	2.02	2.58	3.12	3.62
2		2,57	7,39	25,8	0	0	0	0	0	0	0	0	0	0	0	0	0	0	0	0	0	0	0	0	0	0	0	0	0	0	0	0	0	0	0	0.06	0.09	0.11	0.11	0.11	0.16	0.3	0.56	0.96	1.46	2.02	2.58	3.12	3.63
3		2,57	7,38	25,5	0	0	0	0	0	0	0	0	0	0	0	0	0	0	0	0	0	0	0	0	0	0	0	0	0	0	0	0	0	0	0	0	0.09	0.11	0.11	0.11	0.16	0.3	0.57	0.97	1.47	2.03	2.59	3.13	3.64
1	60	2,56	7,65	37,2	0	0	0	0	0	0	0	0	0	0	0	0	0	0	0	0	0	0	0	0	0	0	0	0	0	0	0	0	0	0	0.06	0.1	0.13	0.13	0.12	0.12	0.18	0.32	0.58	0.97	1.45	1.98	2.52	3.04	3.53
2		2,57	7,75	45,3	0	0	0	0	0	0	0	0	0	0	0	0	0	0	0	0	0	0	0	0	0	0	0	0	0	0	0	0	0	0	0.07	0.1	0.13	0.13	0.12	0.13	0.18	0.32	0.58	0.96	1.43	1.96	2.49	3	3.49
3		2,57	7,78	48,2	0	0	0	0	0	0	0	0	0	0	0	0	0	0	0	0	0	0	0	0	0	0	0	0	0	0	0	0	0	0	0.07	0.11	0.13	0.13	0.12	0.12	0.18	0.32	0.58	0.96	1.43	1.95	2.49	3	3.48
1	61	2,80	8,80	175	0	0	0	0	0	0	0	0	0	0	0	0	0	0	0	0	0	0	0	0	0	0	0	0	0	0	0	0	0	0	0	0	0	0	0	0	0.09	0.22	0.46	0.81	1.26	1.76	2.25	2.72	3.15
2		2,78	8,66	124	0	0	0	0	0	0	0	0	0	0	0	0	0	0	0	0	0	0	0	0	0	0	0	0	0	0	0	0	0	0	0	0	0	0	0	0	0.1	0.23	0.47	0.83	1.28	1.78	2.28	2.75	3.19
3		2,78	8,70	140	0	0	0	0	0	0	0	0	0	0	0	0	0	0	0	0	0	0	0	0	0	0	0	0	0	0	0	0	0	0	0	0	0	0	0	0	0.1	0.23	0.47	0.82	1.28	1.78	2.28	2.75	3.18
1	62	2,65	7,64	25,4	0	0	0	0	0	0	0	0	0	0	0	0	0	0	0	0	0	0	0	0	0	0	0	0	0	0	0	0	0	0	0	0	0	0.07	0.08	0.08	0.13	0.26	0.52	0.91	1.4	1.94	2.49	3	3.49
2		2,64	7,61	25,3	0	0	0	0	0	0	0	0	0	0	0	0	0	0	0	0	0	0	0	0	0	0	0	0	0	0	0	0	0	0	0	0	0	0.07	0.08	0.09	0.13	0.26	0.52	0.91	1.4	1.95	2.5	3.01	3.5
3		2,64	7,58	24,9	0	0	0	0	0	0	0	0	0	0	0	0	0	0	0	0	0	0	0	0	0	0	0	0	0	0	0	0	0	0	0	0	0	0.08	0.08	0.09	0.13	0.27	0.53	0.92	1.41	1.96	2.51	3.03	3.52
1	63	2,53	7,24	23,1	0	0	0	0	0	0	0	0	0	0	0	0	0	0	0	0	0	0	0	0	0	0	0	0	0	0	0	0	0	0	0	0.08	0.12	0.14	0.14	0.13	0.17	0.31	0.58	0.99	1.5	2.07	2.64	3.18	3.68
2		2,52	7,19	22,6	0	0	0	0	0	0	0	0	0	0	0	0	0	0	0	0	0	0	0	0	0	0	0	0	0	0	0	0	0	0	0	0.09	0.13	0.15	0.15	0.14	0.18	0.32	0.59	1	1.52	2.09	2.66	3.19	3.7
3		2,51	7,17	22,6	0	0	0	0	0	0	0	0	0	0	0	0	0	0	0	0	0	0	0	0	0	0	0	0	0	0	0	0	0	0	0	0.09	0.13	0.15	0.15	0.14	0.18	0.32	0.59	1	1.52	2.1	2.67	3.21	3.71
1	64	2,61	7,58	23,6	0	0	0	0	0	0	0	0	0	0	0	0	0	0	0	0	0	0	0	0	0	0	0	0	0	0	0	0	0	0	0	0	0	0.08	0.08	0.07	0.11	0.24	0.51	0.93	1.46	2.05	2.63	3.17	3.65
2		2,60	7,62	23,9	0	0	0	0	0	0	0	0	0	0	0	0	0	0	0	0	0	0	0	0	0	0	0	0	0	0	0	0	0	0	0	0	0.06	0.08	0.08	0.07	0.11	0.24	0.51	0.93	1.46	2.05	2.63	3.16	3.64
3		2,60	7,63	23,9	0	0	0	0	0	0	0	0	0	0	0	0	0	0	0	0	0	0	0	0	0	0	0	0	0	0	0	0	0	0	0	0	0	0.08	0.08	0.08	0.11	0.25	0.51	0.93	1.46	2.05	2.63	3.16	3.64
1	65	2,85	8,26	24,0	0	0	0	0	0	0	0	0	0	0	0	0	0	0	0	0	0	0	0	0	0	0	0	0	0	0	0	0	0	0	0	0	0	0	0	0	0	0.09	0.33	0.71	1.2	1.74	2.27	2.76	3.22
2		2,85	8,26	24,1	0	0	0	0	0	0	0	0	0	0	0	0	0	0	0	0	0	0	0	0	0	0	0	0	0	0	0	0	0	0	0	0	0	0	0	0	0	0.09	0.33	0.71	1.2	1.74	2.27	2.76	3.22
3		2,84	8,24	23,9	0	0	0	0	0	0	0	0	0	0	0	0	0	0	0	0	0	0	0	0	0	0	0	0	0	0	0	0	0	0	0	0	0	0	0	0	0	0.1	0.34	0.72	1.21	1.75	2.28	2.77	3.24
1	66	2,73	8,30	26,6	0	0	0	0	0	0	0	0	0	0	0	0	0	0	0	0	0	0	0	0	0	0	0	0	0	0	0	0	0	0	0	0	0	0.07	0.07	0.07	0.11	0.23	0.47	0.84	1.3	1.83	2.36	2.86	3.32
2		2,74	8,42	27,7	0	0	0	0	0	0	0	0	0	0	0	0	0	0	0	0	0	0	0	0	0	0	0	0	0	0	0	0	0	0	0	0	0	0.07	0.07	0.07	0.11	0.23	0.47	0.83	1.29	1.81	2.33	2.83	3.29
3		2,73	8,43	28,2	0	0	0	0	0	0	0	0	0	0	0	0	0	0	0	0	0	0	0	0	0	0	0	0	0	0	0	0	0	0	0	0	0.06	0.07	0.07	0.07	0.11	0.23	0.47	0.83	1.29	1.8	2.33	2.82	3.28
1	67	2,58	7,17	23,6	0	0	0	0	0	0	0	0	0	0	0	0	0	0	0	0	0	0	0	0	0	0	0	0	0	0	0	0	0	0	0	0	0	0.06	0.06	0.07	0.13	0.28	0.56	0.98	1.51	2.1	2.69	3.25	3.77
2		2,57	7,16	23,5	0	0	0	0	0	0	0	0	0	0	0	0	0	0	0	0	0	0	0	0	0	0	0	0	0	0	0	0	0	0	0	0	0	0.06	0.06	0.07	0.13	0.28	0.56	0.98	1.51	2.1	2.69	3.25	3.78
3		2,57	7,15	23,3	0	0	0	0	0	0	0	0	0	0	0	0	0	0	0	0	0	0	0	0	0	0	0	0	0	0	0	0	0	0	0	0	0	0.07	0.07	0.07	0.13	0.28	0.56	0.98	1.51	2.1	2.7	3.26	3.79
1	68	2,96	8,50	32,0	0	0	0	0	0	0	0	0	0	0	0	0	0	0	0	0	0	0	0	0	0	0	0	0	0	0	0	0	0	0	0	0	0	0	0	0	0	0.07	0.27	0.61	1.07	1.58	2.09	2.57	3.05
2		2,95	8,46	31,4	0	0	0	0	0	0	0	0	0	0	0	0	0	0	0	0	0	0	0	0	0	0	0	0	0	0	0	0	0	0	0	0	0	0	0	0	0	0.07	0.27	0.62	1.08	1.59	2.1	2.58	3.06
3		2,95	8,47	32,0	0	0	0	0	0	0	0	0	0	0	0	0	0	0	0	0	0	0	0	0	0	0	0	0	0	0	0	0	0	0	0	0	0	0	0	0	0	0.07	0.27	0.62	1.08	1.59	2.1	2.59	3.06
1	69	2,74	7,60	22,9	0	0	0	0	0	0	0	0	0	0	0	0	0	0	0	0	0	0	0	0	0	0	0	0	0	0	0	0	0	0	0	0	0	0	0	0	0	0.14	0.4	0.82	1.34	1.92	2.48	3.01	3.51
2		2,73	7,57	22,8	0	0	0	0	0	0	0	0	0	0	0	0	0	0	0	0	0	0	0	0	0	0	0	0	0	0	0	0	0	0	0	0	0	0	0	0	0	0.14	0.41	0.83	1.35	1.93	2.5	3.03	3.53
3		2,72	7,56	22,8	0	0	0	0	0	0	0	0	0	0	0	0	0	0	0	0	0	0	0	0	0	0	0	0	0	0	0	0	0	0	0	0	0	0	0	0	0	0.14	0.41	0.83	1.36	1.94	2.51	3.04	3.54
1	70	2,53	7,20	26,2	0	0	0	0	0	0	0	0	0	0	0	0	0	0	0	0	0	0	0	0	0	0	0	0	0	0	0	0	0	0	0	0.07	0.11	0.12	0.11	0.11	0.16	0.31	0.59	1	1.52	2.09	2.67	3.22	3.74
2		2,53	7,23	26,9	0	0	0	0	0	0	0	0	0	0	0	0	0	0	0	0	0	0	0	0	0	0	0	0	0	0	0	0	0	0	0	0.08	0.11	0.12	0.11	0.12	0.17	0.31	0.59	1	1.52	2.09	2.66	3.21	3.73
3		2,53	7,21	26,6	0	0	0	0	0	0	0	0	0	0	0	0	0	0	0	0	0	0	0	0	0	0	0	0	0	0	0	0	0	0	0	0.08	0.11	0.12	0.11	0.12	0.17	0.32	0.59	1	1.52	2.09	2.67	3.22	3.74
1	71	2,63	7,99	47,4	0	0	0	0	0	0	0	0	0	0	0	0	0	0	0	0	0	0	0	0	0	0	0	0	0	0	0	0	0	0	0	0.07	0.11	0.12	0.12	0.11	0.14	0.27	0.51	0.89	1.37	1.9	2.44	2.94	3.42
2		2,64	8,08	54,7	0	0	0	0	0	0	0	0	0	0	0	0	0	0	0	0	0	0	0	0	0	0	0	0	0	0	0	0	0	0	0	0.07	0.11	0.12	0.12	0.11	0.14	0.26	0.51	0.88	1.36	1.89	2.42	2.92	3.39
3		2,63	7,99	48,3	0	0	0	0	0	0	0	0	0	0	0	0	0	0	0	0	0	0	0	0	0	0	0	0	0	0	0	0	0	0	0	0.07	0.11	0.13	0.12	0.11	0.14	0.26	0.51	0.89	1.37	1.9	2.44	2.95	3.42
1	72	2,86	8,95	110	0	0	0	0	0	0	0	0	0	0	0	0	0	0	0	0	0	0	0	0	0	0	0	0	0	0	0	0	0	0	0	0	0	0	0	0	0.07	0.19	0.42	0.76	1.19	1.66	2.15	2.61	3.05
2		2,85	8,87	99,3	0	0	0	0	0	0	0	0	0	0	0	0	0	0	0	0	0	0	0	0	0	0	0	0	0	0	0	0	0	0	0	0	0	0	0	0	0.07	0.2	0.43	0.77	1.2	1.68	2.17	2.63	3.07
3		2,85	8,91	105	0	0	0	0	0	0	0	0	0	0	0	0	0	0	0	0	0	0	0	0	0	0	0	0	0	0	0	0	0	0	0	0	0	0	0	0	0.07	0.2	0.43	0.77	1.2	1.68	2.16	2.62	3.07
1	73.27	2,92	8,92	79,6	0	0	0	0	0	0	0	0	0	0	0	0	0	0	0	0	0	0	0	0	0	0	0	0	0	0	0	0	0	0	0	0	0	0	0	0	0	0.13	0.35	0.69	1.13	1.61	2.09	2.55	3
2		2,92	8,91	78,4	0	0	0	0	0	0	0	0	0	0	0	0	0	0	0	0	0	0	0	0	0	0	0	0	0	0	0	0	0	0	0	0	0	0	0	0	0	0.14	0.36	0.7	1.13	1.61	2.1	2.56	3.01
3		2,89	8,67	54,0	0	0	0	0	0	0	0	0	0	0	0	0	0	0	0	0	0	0	0	0	0	0	0	0	0	0	0	0	0	0	0	0	0	0	0	0	0	0.15	0.38	0.72	1.16	1.65	2.15	2.62	3.08
1	73.7	2,74	7,81	26,8	0	0	0	0	0	0	0	0	0	0	0	0	0	0	0	0	0	0	0	0	0	0	0	0	0	0	0	0	0	0	0	0	0	0	0	0	0.09	0.23	0.48	0.86	1.33	1.85	2.39	2.9	3.4
2		2,72	7,72	26,0	0	0	0	0	0	0	0	0	0	0	0	0	0	0	0	0	0	0	0	0	0	0	0	0	0	0	0	0	0	0	0	0	0	0	0	0	0.1	0.24	0.49	0.87	1.35	1.88	2.41	2.93	3.43
3		2,70	7,60	24,6	0	0	0	0	0	0	0	0	0	0	0	0	0	0	0	0	0	0	0	0	0	0	0	0	0	0	0	0	0	0	0	0	0	0	0	0	0.11	0.25	0.51	0.89	1.37	1.91	2.45	2.98	3.49
1	74.13	2,73	8,00	31,9	0	0	0	0	0	0	0	0	0	0	0	0	0	0	0	0	0	0	0	0	0	0	0	0	0	0	0	0	0	0	0	0	0	0	0	0	0.09	0.22	0.48	0.85	1.34	1.87	2.4	2.91	3.39
2		2,70	7,80	28,7	0	0	0	0	0	0	0	0	0	0	0	0	0	0	0	0	0	0	0	0	0	0	0	0	0	0	0	0	0	0	0	0	0	0	0	0	0.09	0.23	0.49	0.88	1.37	1.91	2.46	2.98	3.46
3		2,69	7,73	27,9	0	0	0	0	0	0	0	0	0	0	0	0	0	0	0	0	0	0	0	0	0	0	0	0	0	0	0	0	0	0	0	0	0	0	0	0	0.1	0.24	0.5	0.89	1.38	1.93	2.48	3	3.49
1	74.56	2,88	8,53	33,2	0	0	0	0	0	0	0	0	0	0	0	0	0	0	0	0	0	0	0	0	0	0	0	0	0	0	0	0	0	0	0	0	0	0	0	0	0	0.13	0.36	0.72	1.17	1.67	2.16	2.64	3.1
2		2,86	8,36	30,3	0	0	0	0	0	0	0	0	0	0	0	0	0	0	0	0	0	0	0	0	0	0	0	0	0	0	0	0	0	0	0	0	0	0	0	0	0	0.14	0.38	0.74	1.19	1.7	2.21	2.69	3.16
3		2,85	8,30	29,8	0	0	0	0	0	0	0	0	0	0	0	0	0	0	0	0	0	0	0	0	0	0	0	0	0	0	0	0	0	0	0	0	0	0	0	0	0	0.14	0.38	0.75	1.21	1.71	2.22	2.71	3.18
1	74.99	2,80	8,09	28,9	0	0	0	0	0	0	0	0	0	0	0	0	0	0	0	0	0	0	0	0	0	0	0	0	0	0	0	0	0	0	0	0	0	0	0	0	0	0.15	0.41	0.78	1.26	1.79	2.32	2.81	3.29
2		2,77	7,90	26,1	0	0	0	0	0	0	0	0	0	0	0	0	0	0	0	0	0	0	0	0	0	0	0	0	0	0	0	0	0	0	0	0	0	0	0	0	0	0.16	0.42	0.81	1.3	1.83	2.37	2.88	3.36
3		2,76	7,82	25,6	0	0	0	0	0	0	0	0	0	0	0	0	0	0	0	0	0	0	0	0	0	0	0	0	0	0	0	0	0	0	0	0	0	0	0	0	0	0.17	0.43	0.82	1.31	1.85	2.4	2.91	3.4
1	75.42	2,69	7,44	22,6	0	0	0	0	0	0	0	0	0	0	0	0	0	0	0	0	0	0	0	0	0	0	0	0	0	0	0	0	0	0	0	0	0	0	0	0	0	0.18	0.46	0.88	1.4	1.98	2.55	3.08	3.58
2		2,68	7,36	21,9	0	0	0	0	0	0	0	0	0	0	0	0	0	0	0	0	0	0	0	0	0	0	0	0	0	0	0	0	0	0	0	0	0	0	0	0	0	0.19	0.47	0.89	1.42	2	2.58	3.12	3.63
3		2,67	7,36	22,1	0	0	0	0	0	0	0	0	0	0	0	0	0	0	0	0	0	0	0	0	0	0	0	0	0	0	0	0	0	0	0	0	0	0	0	0	0	0.19	0.47	0.89	1.42	2	2.58	3.12	3.63
1	75.86	2,74	7,90	29,0	0	0	0	0	0	0	0	0	0	0	0	0	0	0	0	0	0	0	0	0	0	0	0	0	0	0	0	0	0	0	0	0	0	0	0	0	0.08	0.21	0.47	0.84	1.32	1.85	2.39	2.9	3.38
2		2,70	7,66	25,4	0	0	0	0	0	0	0	0	0	0	0	0	0	0	0	0	0	0	0	0	0	0	0	0	0	0	0	0	0	0	0	0	0	0	0	0	0.09	0.23	0.49	0.88	1.37	1.91	2.46	2.98	3.48
3		2,69	7,59	24,6	0	0	0	0	0	0	0	0	0	0	0	0	0	0	0	0	0	0	0	0	0	0	0	0	0	0	0	0	0	0	0	0	0	0	0	0	0.09	0.23	0.49	0.88	1.38	1.93	2.49	3.01	3.51
1	76.29	2,70	7,49	22,9	0	0	0	0	0	0	0	0	0	0	0	0	0	0	0	0	0	0	0	0	0	0	0	0	0	0	0	0	0	0	0	0	0	0	0	0	0.07	0.21	0.48	0.87	1.37	1.93	2.49	3.03	3.54
2		2,69	7,42	22,3	0	0	0	0	0	0	0	0	0	0	0	0	0	0	0	0	0	0	0	0	0	0	0	0	0	0	0	0	0	0	0	0	0	0	0	0	0.07	0.21	0.48	0.88	1.39	1.95	2.52	3.06	3.58
3		2,68	7,38	22,2	0	0	0	0	0	0	0	0	0	0	0	0	0	0	0	0	0	0	0	0	0	0	0	0	0	0	0	0	0	0	0	0	0	0	0	0	0.07	0.22	0.49	0.89	1.4	1.97	2.54	3.08	3.61
1	76.72	2,78	7,94	28,3	0	0	0	0	0	0	0	0	0	0	0	0	0	0	0	0	0	0	0	0	0	0	0	0	0	0	0	0	0	0	0	0	0	0	0	0	0	0.16	0.42	0.8	1.29	1.83	2.37	2.88	3.37
2		2,75	7,78	26,0	0	0	0	0	0	0	0	0	0	0	0	0	0	0	0	0	0	0	0	0	0	0	0	0	0	0	0	0	0	0	0	0	0	0	0	0	0	0.17	0.43	0.82	1.32	1.86	2.41	2.93	3.43
3		2,75	7,76	25,8	0	0	0	0	0	0	0	0	0	0	0	0	0	0	0	0	0	0	0	0	0	0	0	0	0	0	0	0	0	0	0	0	0	0	0	0	0	0.18	0.44	0.83	1.32	1.87	2.42	2.94	3.44
1	77.15	2,65	7,47	23,1	0	0	0	0	0	0	0	0	0	0	0	0	0	0	0	0	0	0	0	0	0	0	0	0	0	0	0	0	0	0	0	0	0	0	0	0	0.11	0.26	0.53	0.93	1.43	1.98	2.54	3.07	3.58
2		2,65	7,45	23,0	0	0	0	0	0	0	0	0	0	0	0	0	0	0	0	0	0	0	0	0	0	0	0	0	0	0	0	0	0	0	0	0	0	0	0	0	0.11	0.26	0.53	0.93	1.43	1.99	2.55	3.08	3.59
3		2,65	7,44	22,9	0	0	0	0	0	0	0	0	0	0	0	0	0	0	0	0	0	0	0	0	0	0	0	0	0	0	0	0	0	0	0	0	0	0	0	0	0.11	0.26	0.54	0.93	1.43	1.99	2.55	3.09	3.6
1	77.58	2,83	8,25	30,8	0	0	0	0	0	0	0	0	0	0	0	0	0	0	0	0	0	0	0	0	0	0	0	0	0	0	0	0	0	0	0	0	0	0	0	0	0	0.15	0.39	0.75	1.22	1.74	2.26	2.76	3.24
2		2,81	8,12	28,8	0	0	0	0	0	0	0	0	0	0	0	0	0	0	0	0	0	0	0	0	0	0	0	0	0	0	0	0	0	0	0	0	0	0	0	0	0	0.15	0.4	0.77	1.24	1.76	2.29	2.8	3.28
3		2,81	8,08	28,4	0	0	0	0	0	0	0	0	0	0	0	0	0	0	0	0	0	0	0	0	0	0	0	0	0	0	0	0	0	0	0	0	0	0	0	0	0	0.16	0.41	0.78	1.25	1.77	2.3	2.81	3.29
1	78.02	2,81	8,04	30,6	0	0	0	0	0	0	0	0	0	0	0	0	0	0	0	0	0	0	0	0	0	0	0	0	0	0	0	0	0	0	0	0	0	0	0	0	0	0.13	0.37	0.76	1.24	1.79	2.33	2.84	3.33
2		2,80	7,98	29,9	0	0	0	0	0	0	0	0	0	0	0	0	0	0	0	0	0	0	0	0	0	0	0	0	0	0	0	0	0	0	0	0	0	0	0	0	0	0.14	0.39	0.77	1.26	1.8	2.35	2.86	3.35
3		2,77	7,81	26,9	0	0	0	0	0	0	0	0	0	0	0	0	0	0	0	0	0	0	0	0	0	0	0	0	0	0	0	0	0	0	0	0	0	0	0	0	0	0.14	0.4	0.79	1.29	1.84	2.39	2.92	3.42
1	78.45	2,71	7,80	25,6	0	0	0	0	0	0	0	0	0	0	0	0	0	0	0	0	0	0	0	0	0	0	0	0	0	0	0	0	0	0	0	0	0	0	0	0	0.1	0.25	0.51	0.88	1.36	1.89	2.42	2.93	3.41
2		2,69	7,68	24,3	0	0	0	0	0	0	0	0	0	0	0	0	0	0	0	0	0	0	0	0	0	0	0	0	0	0	0	0	0	0	0	0	0	0	0	0	0.1	0.25	0.52	0.9	1.39	1.92	2.46	2.97	3.46
3		2,68	7,64	24,0	0	0	0	0	0	0	0	0	0	0	0	0	0	0	0	0	0	0	0	0	0	0	0	0	0	0	0	0	0	0	0	0	0	0	0	0	0.11	0.26	0.53	0.91	1.4	1.93	2.47	2.99	3.48
1	78.88	2,79	7,84	23,8	0	0	0	0	0	0	0	0	0	0	0	0	0	0	0	0	0	0	0	0	0	0	0	0	0	0	0	0	0	0	0	0	0	0	0	0	0	0.14	0.39	0.78	1.27	1.81	2.35	2.86	3.35
2		2,78	7,79	23,3	0	0	0	0	0	0	0	0	0	0	0	0	0	0	0	0	0	0	0	0	0	0	0	0	0	0	0	0	0	0	0	0	0	0	0	0	0	0.14	0.4	0.79	1.28	1.82	2.36	2.88	3.37
3		2,78	7,76	23,2	0	0	0	0	0	0	0	0	0	0	0	0	0	0	0	0	0	0	0	0	0	0	0	0	0	0	0	0	0	0	0	0	0	0	0	0	0	0.15	0.4	0.8	1.29	1.83	2.37	2.89	3.39
1	79.74	2,87	8,48	32,1	0	0	0	0	0	0	0	0	0	0	0	0	0	0	0	0	0	0	0	0	0	0	0	0	0	0	0	0	0	0	0	0	0	0	0	0	0	0.14	0.37	0.73	1.18	1.68	2.18	2.66	3.12
2		2,85	8,32	29,5	0	0	0	0	0	0	0	0	0	0	0	0	0	0	0	0	0	0	0	0	0	0	0	0	0	0	0	0	0	0	0	0	0	0	0	0	0	0.14	0.38	0.74	1.2	1.71	2.22	2.71	3.18
3		2,85	8,29	29,5	0	0	0	0	0	0	0	0	0	0	0	0	0	0	0	0	0	0	0	0	0	0	0	0	0	0	0	0	0	0	0	0	0	0	0	0	0	0.15	0.39	0.75	1.21	1.72	2.23	2.72	3.19
1	80.17	2,86	8,39	33,1	0	0	0	0	0	0	0	0	0	0	0	0	0	0	0	0	0	0	0	0	0	0	0	0	0	0	0	0	0	0	0	0	0	0	0	0	0	0.13	0.37	0.73	1.19	1.69	2.2	2.69	3.16
2		2,84	8,21	29,4	0	0	0	0	0	0	0	0	0	0	0	0	0	0	0	0	0	0	0	0	0	0	0	0	0	0	0	0	0	0	0	0	0	0	0	0	0	0.14	0.38	0.75	1.21	1.72	2.24	2.74	3.22
3		2,83	8,13	28,2	0	0	0	0	0	0	0	0	0	0	0	0	0	0	0	0	0	0	0	0	0	0	0	0	0	0	0	0	0	0	0	0	0	0	0	0	0	0.15	0.39	0.76	1.22	1.74	2.26	2.77	3.25
1	80.61	2,81	8,15	31,0	0	0	0	0	0	0	0	0	0	0	0	0	0	0	0	0	0	0	0	0	0	0	0	0	0	0	0	0	0	0	0	0	0	0	0	0	0	0.15	0.39	0.77	1.24	1.77	2.3	2.8	3.29
2		2,81	8,13	30,7	0	0	0	0	0	0	0	0	0	0	0	0	0	0	0	0	0	0	0	0	0	0	0	0	0	0	0	0	0	0	0	0	0	0	0	0	0	0.15	0.4	0.78	1.25	1.78	2.31	2.81	3.3
3		2,79	7,97	27,8	0	0	0	0	0	0	0	0	0	0	0	0	0	0	0	0	0	0	0	0	0	0	0	0	0	0	0	0	0	0	0	0	0	0	0	0	0	0.16	0.41	0.79	1.28	1.81	2.35	2.86	3.35
1	81.04	2,90	8,26	27,0	0	0	0	0	0	0	0	0	0	0	0	0	0	0	0	0	0	0	0	0	0	0	0	0	0	0	0	0	0	0	0	0	0	0	0	0	0	0.09	0.31	0.67	1.14	1.66	2.17	2.67	3.15
2		2,90	8,25	27,0	0	0	0	0	0	0	0	0	0	0	0	0	0	0	0	0	0	0	0	0	0	0	0	0	0	0	0	0	0	0	0	0	0	0	0	0	0	0.09	0.31	0.68	1.14	1.66	2.18	2.67	3.16
3		2,89	8,19	26,4	0	0	0	0	0	0	0	0	0	0	0	0	0	0	0	0	0	0	0	0	0	0	0	0	0	0	0	0	0	0	0	0	0	0	0	0	0	0.09	0.32	0.68	1.15	1.67	2.2	2.7	3.18
1	81.47	3,04	8,79	32,5	0	0	0	0	0	0	0	0	0	0	0	0	0	0	0	0	0	0	0	0	0	0	0	0	0	0	0	0	0	0	0	0	0	0	0	0	0	0	0.22	0.55	0.99	1.49	1.99	2.46	2.92
2		3,02	8,67	30,2	0	0	0	0	0	0	0	0	0	0	0	0	0	0	0	0	0	0	0	0	0	0	0	0	0	0	0	0	0	0	0	0	0	0	0	0	0	0	0.22	0.56	1.01	1.51	2.02	2.49	2.96
3		3,01	8,62	29,6	0	0	0	0	0	0	0	0	0	0	0	0	0	0	0	0	0	0	0	0	0	0	0	0	0	0	0	0	0	0	0	0	0	0	0	0	0	0	0.23	0.57	1.02	1.53	2.03	2.51	2.98
1	81.9	2,96	8,40	31,2	0	0	0	0	0	0	0	0	0	0	0	0	0	0	0	0	0	0	0	0	0	0	0	0	0	0	0	0	0	0	0	0	0	0	0	0	0	0	0.22	0.57	1.06	1.6	2.14	2.64	3.12
2		2,95	8,34	30,4	0	0	0	0	0	0	0	0	0	0	0	0	0	0	0	0	0	0	0	0	0	0	0	0	0	0	0	0	0	0	0	0	0	0	0	0	0	0	0.22	0.58	1.07	1.61	2.15	2.66	3.14
3		2,94	8,26	29,2	0	0	0	0	0	0	0	0	0	0	0	0	0	0	0	0	0	0	0	0	0	0	0	0	0	0	0	0	0	0	0	0	0	0	0	0	0	0	0.22	0.59	1.08	1.63	2.17	2.68	3.17
1	82.33	2,97	8,79	40,0	0	0	0	0	0	0	0	0	0	0	0	0	0	0	0	0	0	0	0	0	0	0	0	0	0	0	0	0	0	0	0	0	0	0	0	0	0	0.06	0.26	0.61	1.07	1.57	2.08	2.56	3.02
2		2,94	8,60	34,8	0	0	0	0	0	0	0	0	0	0	0	0	0	0	0	0	0	0	0	0	0	0	0	0	0	0	0	0	0	0	0	0	0	0	0	0	0	0.07	0.27	0.62	1.09	1.61	2.12	2.61	3.07
3		2,94	8,58	34,5	0	0	0	0	0	0	0	0	0	0	0	0	0	0	0	0	0	0	0	0	0	0	0	0	0	0	0	0	0	0	0	0	0	0	0	0	0	0.07	0.27	0.63	1.09	1.61	2.13	2.61	3.08
1	82.77	2,78	8,30	41,6	0	0	0	0	0	0	0	0	0	0	0	0	0	0	0	0	0	0	0	0	0	0	0	0	0	0	0	0	0	0	0	0	0	0	0	0	0	0.19	0.44	0.81	1.28	1.81	2.34	2.84	3.32
2		2,77	8,22	39,4	0	0	0	0	0	0	0	0	0	0	0	0	0	0	0	0	0	0	0	0	0	0	0	0	0	0	0	0	0	0	0	0	0	0	0	0	0.06	0.2	0.45	0.82	1.29	1.82	2.35	2.86	3.35
3		2,77	8,24	40,3	0	0	0	0	0	0	0	0	0	0	0	0	0	0	0	0	0	0	0	0	0	0	0	0	0	0	0	0	0	0	0	0	0	0	0	0	0.06	0.2	0.45	0.82	1.29	1.82	2.35	2.86	3.34
1	83.2	2,81	8,23	36,0	0	0	0	0	0	0	0	0	0	0	0	0	0	0	0	0	0	0	0	0	0	0	0	0	0	0	0	0	0	0	0	0	0	0	0	0	0	0.15	0.39	0.77	1.24	1.77	2.3	2.81	3.3
2		2,80	8,13	33,8	0	0	0	0	0	0	0	0	0	0	0	0	0	0	0	0	0	0	0	0	0	0	0	0	0	0	0	0	0	0	0	0	0	0	0	0	0	0.15	0.4	0.78	1.25	1.79	2.33	2.84	3.33
3		2,80	8,11	33,4	0	0	0	0	0	0	0	0	0	0	0	0	0	0	0	0	0	0	0	0	0	0	0	0	0	0	0	0	0	0	0	0	0	0	0	0	0	0.16	0.4	0.78	1.26	1.79	2.33	2.85	3.34
1	83.63	2,87	8,33	32,0	0	0	0	0	0	0	0	0	0	0	0	0	0	0	0	0	0	0	0	0	0	0	0	0	0	0	0	0	0	0	0	0	0	0	0	0	0	0.09	0.32	0.7	1.17	1.7	2.22	2.72	3.19
2		2,86	8,25	30,3	0	0	0	0	0	0	0	0	0	0	0	0	0	0	0	0	0	0	0	0	0	0	0	0	0	0	0	0	0	0	0	0	0	0	0	0	0	0.1	0.33	0.71	1.19	1.72	2.25	2.74	3.22
3		2,85	8,23	30,4	0	0	0	0	0	0	0	0	0	0	0	0	0	0	0	0	0	0	0	0	0	0	0	0	0	0	0	0	0	0	0	0	0	0	0	0	0	0.1	0.34	0.71	1.19	1.72	2.25	2.75	3.23
1	84.06	2,79	8,09	35,3	0	0	0	0	0	0	0	0	0	0	0	0	0	0	0	0	0	0	0	0	0	0	0	0	0	0	0	0	0	0	0	0	0	0	0	0	0	0.14	0.39	0.78	1.27	1.82	2.37	2.89	3.38
2		2,76	7,90	30,9	0	0	0	0	0	0	0	0	0	0	0	0	0	0	0	0	0	0	0	0	0	0	0	0	0	0	0	0	0	0	0	0	0	0	0	0	0	0.15	0.41	0.8	1.31	1.86	2.42	2.95	3.45
3		2,76	7,90	30,8	0	0	0	0	0	0	0	0	0	0	0	0	0	0	0	0	0	0	0	0	0	0	0	0	0	0	0	0	0	0	0	0	0	0	0	0	0	0.15	0.41	0.8	1.31	1.86	2.42	2.95	3.45
1	84.49	2,92	8,74	39,5	0	0	0	0	0	0	0	0	0	0	0	0	0	0	0	0	0	0	0	0	0	0	0	0	0	0	0	0	0	0	0	0	0	0	0	0	0	0.09	0.31	0.67	1.12	1.62	2.12	2.6	3.05
2		2,91	8,61	36,1	0	0	0	0	0	0	0	0	0	0	0	0	0	0	0	0	0	0	0	0	0	0	0	0	0	0	0	0	0	0	0	0	0	0	0	0	0	0.1	0.32	0.68	1.14	1.65	2.15	2.63	3.09
3		2,90	8,61	36,7	0	0	0	0	0	0	0	0	0	0	0	0	0	0	0	0	0	0	0	0	0	0	0	0	0	0	0	0	0	0	0	0	0	0	0	0	0	0.1	0.33	0.68	1.14	1.65	2.15	2.63	3.09
1	84.92	2,92	8,64	32,7	0	0	0	0	0	0	0	0	0	0	0	0	0	0	0	0	0	0	0	0	0	0	0	0	0	0	0	0	0	0	0	0	0	0	0	0	0	0.1	0.33	0.68	1.13	1.63	2.12	2.59	3.05
2		2,91	8,59	31,5	0	0	0	0	0	0	0	0	0	0	0	0	0	0	0	0	0	0	0	0	0	0	0	0	0	0	0	0	0	0	0	0	0	0	0	0	0	0.11	0.33	0.69	1.14	1.64	2.14	2.61	3.06
3		2,90	8,52	30,5	0	0	0	0	0	0	0	0	0	0	0	0	0	0	0	0	0	0	0	0	0	0	0	0	0	0	0	0	0	0	0	0	0	0	0	0	0	0.11	0.34	0.7	1.15	1.65	2.15	2.63	3.08
1	85.36	2,86	8,70	40,4	0	0	0	0	0	0	0	0	0	0	0	0	0	0	0	0	0	0	0	0	0	0	0	0	0	0	0	0	0	0	0	0	0	0	0	0	0	0.15	0.38	0.74	1.2	1.7	2.2	2.67	3.12
2		2,85	8,65	39,6	0	0	0	0	0	0	0	0	0	0	0	0	0	0	0	0	0	0	0	0	0	0	0	0	0	0	0	0	0	0	0	0	0	0	0	0	0	0.15	0.39	0.75	1.2	1.71	2.21	2.68	3.13
3		2,83	8,49	35,3	0	0	0	0	0	0	0	0	0	0	0	0	0	0	0	0	0	0	0	0	0	0	0	0	0	0	0	0	0	0	0	0	0	0	0	0	0	0.16	0.4	0.76	1.23	1.73	2.24	2.72	3.18
1	85.79	2,67	8,02	36,7	0	0	0	0	0	0	0	0	0	0	0	0	0	0	0	0	0	0	0	0	0	0	0	0	0	0	0	0	0	0	0	0	0	0.06	0.06	0.07	0.12	0.26	0.51	0.9	1.38	1.92	2.45	2.95	3.42
2		2,64	7,82	31,6	0	0	0	0	0	0	0	0	0	0	0	0	0	0	0	0	0	0	0	0	0	0	0	0	0	0	0	0	0	0	0	0	0	0.07	0.07	0.08	0.13	0.27	0.53	0.92	1.41	1.96	2.5	3.01	3.49
3		2,66	7,97	35,8	0	0	0	0	0	0	0	0	0	0	0	0	0	0	0	0	0	0	0	0	0	0	0	0	0	0	0	0	0	0	0	0	0	0.07	0.07	0.08	0.13	0.26	0.52	0.91	1.39	1.93	2.47	2.97	3.44
1	86.22	2,69	7,56	26,3	0	0	0	0	0	0	0	0	0	0	0	0	0	0	0	0	0	0	0	0	0	0	0	0	0	0	0	0	0	0	0	0	0	0	0	0	0.08	0.22	0.49	0.88	1.38	1.94	2.5	3.04	3.55
2		2,68	7,48	25,1	0	0	0	0	0	0	0	0	0	0	0	0	0	0	0	0	0	0	0	0	0	0	0	0	0	0	0	0	0	0	0	0	0	0	0	0	0.09	0.23	0.49	0.89	1.4	1.96	2.53	3.07	3.59
3		2,67	7,44	24,8	0	0	0	0	0	0	0	0	0	0	0	0	0	0	0	0	0	0	0	0	0	0	0	0	0	0	0	0	0	0	0	0	0	0	0	0	0.09	0.23	0.5	0.9	1.41	1.97	2.54	3.08	3.6
1	86.65	2,70	7,56	25,0	0	0	0	0	0	0	0	0	0	0	0	0	0	0	0	0	0	0	0	0	0	0	0	0	0	0	0	0	0	0	0	0	0	0	0	0	0.1	0.23	0.48	0.86	1.35	1.9	2.46	3.01	3.53
2		2,70	7,53	24,7	0	0	0	0	0	0	0	0	0	0	0	0	0	0	0	0	0	0	0	0	0	0	0	0	0	0	0	0	0	0	0	0	0	0	0	0	0.1	0.23	0.49	0.87	1.36	1.91	2.48	3.02	3.54
3		2,69	7,52	24,8	0	0	0	0	0	0	0	0	0	0	0	0	0	0	0	0	0	0	0	0	0	0	0	0	0	0	0	0	0	0	0	0	0	0	0	0	0.1	0.24	0.49	0.87	1.36	1.92	2.48	3.02	3.55
1	87.08	2,84	8,33	34,9	0	0	0	0	0	0	0	0	0	0	0	0	0	0	0	0	0	0	0	0	0	0	0	0	0	0	0	0	0	0	0	0	0	0	0	0	0	0.12	0.36	0.73	1.21	1.73	2.26	2.75	3.23
2		2,83	8,25	33,0	0	0	0	0	0	0	0	0	0	0	0	0	0	0	0	0	0	0	0	0	0	0	0	0	0	0	0	0	0	0	0	0	0	0	0	0	0	0.13	0.37	0.74	1.22	1.75	2.28	2.78	3.25
3		2,83	8,23	32,8	0	0	0	0	0	0	0	0	0	0	0	0	0	0	0	0	0	0	0	0	0	0	0	0	0	0	0	0	0	0	0	0	0	0	0	0	0	0.13	0.37	0.75	1.22	1.75	2.28	2.78	3.26
1	87.52	2,79	7,96	30,5	0	0	0	0	0	0	0	0	0	0	0	0	0	0	0	0	0	0	0	0	0	0	0	0	0	0	0	0	0	0	0	0	0	0	0	0	0	0.15	0.4	0.78	1.27	1.81	2.35	2.87	3.36
2		2,77	7,86	28,4	0	0	0	0	0	0	0	0	0	0	0	0	0	0	0	0	0	0	0	0	0	0	0	0	0	0	0	0	0	0	0	0	0	0	0	0	0	0.16	0.41	0.8	1.29	1.83	2.38	2.9	3.4
3		2,77	7,87	28,9	0	0	0	0	0	0	0	0	0	0	0	0	0	0	0	0	0	0	0	0	0	0	0	0	0	0	0	0	0	0	0	0	0	0	0	0	0	0.16	0.41	0.8	1.29	1.83	2.38	2.9	3.4
1	87.95	2,62	7,40	29,2	0	0	0	0	0	0	0	0	0	0	0	0	0	0	0	0	0	0	0	0	0	0	0	0	0	0	0	0	0	0	0	0	0	0	0	0	0.12	0.27	0.55	0.96	1.48	2.05	2.63	3.18	3.7
2		2,59	7,29	27,0	0	0	0	0	0	0	0	0	0	0	0	0	0	0	0	0	0	0	0	0	0	0	0	0	0	0	0	0	0	0	0	0	0	0	0	0.06	0.13	0.28	0.56	0.98	1.5	2.08	2.66	3.22	3.75
3		2,59	7,25	26,5	0	0	0	0	0	0	0	0	0	0	0	0	0	0	0	0	0	0	0	0	0	0	0	0	0	0	0	0	0	0	0	0	0	0	0	0.06	0.13	0.29	0.57	0.99	1.51	2.09	2.67	3.23	3.76
1	88.38	2,66	7,61	30,4	0	0	0	0	0	0	0	0	0	0	0	0	0	0	0	0	0	0	0	0	0	0	0	0	0	0	0	0	0	0	0	0	0	0	0	0	0.11	0.26	0.53	0.92	1.42	1.98	2.53	3.07	3.57
2		2,64	7,53	28,9	0	0	0	0	0	0	0	0	0	0	0	0	0	0	0	0	0	0	0	0	0	0	0	0	0	0	0	0	0	0	0	0	0	0	0	0	0.12	0.27	0.54	0.94	1.44	2	2.56	3.1	3.61
3		2,64	7,53	29,2	0	0	0	0	0	0	0	0	0	0	0	0	0	0	0	0	0	0	0	0	0	0	0	0	0	0	0	0	0	0	0	0	0	0	0	0.06	0.12	0.27	0.54	0.94	1.44	2	2.56	3.1	3.61
1	88.81	2,73	7,78	29,9	0	0	0	0	0	0	0	0	0	0	0	0	0	0	0	0	0	0	0	0	0	0	0	0	0	0	0	0	0	0	0	0	0	0	0	0	0.06	0.21	0.47	0.85	1.33	1.88	2.42	2.95	3.45
2		2,72	7,70	28,4	0	0	0	0	0	0	0	0	0	0	0	0	0	0	0	0	0	0	0	0	0	0	0	0	0	0	0	0	0	0	0	0	0	0	0	0	0.07	0.22	0.48	0.86	1.35	1.89	2.44	2.97	3.48
3		2,71	7,64	27,6	0	0	0	0	0	0	0	0	0	0	0	0	0	0	0	0	0	0	0	0	0	0	0	0	0	0	0	0	0	0	0	0	0	0	0	0	0.08	0.22	0.48	0.87	1.36	1.91	2.46	2.99	3.5
1	89.24	2,68	7,58	29,3	0	0	0	0	0	0	0	0	0	0	0	0	0	0	0	0	0	0	0	0	0	0	0	0	0	0	0	0	0	0	0	0	0	0	0	0	0.09	0.23	0.5	0.89	1.4	1.96	2.53	3.07	3.59
2		2,67	7,56	29,3	0	0	0	0	0	0	0	0	0	0	0	0	0	0	0	0	0	0	0	0	0	0	0	0	0	0	0	0	0	0	0	0	0	0	0	0	0.09	0.23	0.5	0.9	1.4	1.97	2.54	3.08	3.6
3		2,65	7,46	27,4	0	0	0	0	0	0	0	0	0	0	0	0	0	0	0	0	0	0	0	0	0	0	0	0	0	0	0	0	0	0	0	0	0	0	0	0	0.1	0.24	0.51	0.91	1.42	1.99	2.57	3.12	3.64
1	89.67	2,74	7,95	36,4	0	0	0	0	0	0	0	0	0	0	0	0	0	0	0	0	0	0	0	0	0	0	0	0	0	0	0	0	0	0	0	0	0	0	0	0	0.08	0.22	0.47	0.85	1.32	1.86	2.4	2.92	3.42
2		2,72	7,85	34,1	0	0	0	0	0	0	0	0	0	0	0	0	0	0	0	0	0	0	0	0	0	0	0	0	0	0	0	0	0	0	0	0	0	0	0	0	0.08	0.22	0.48	0.86	1.34	1.88	2.43	2.96	3.46
3		2,71	7,79	32,9	0	0	0	0	0	0	0	0	0	0	0	0	0	0	0	0	0	0	0	0	0	0	0	0	0	0	0	0	0	0	0	0	0	0	0	0	0.08	0.23	0.48	0.87	1.35	1.89	2.45	2.98	3.48
1	90.11	2,68	7,75	37,9	0	0	0	0	0	0	0	0	0	0	0	0	0	0	0	0	0	0	0	0	0	0	0	0	0	0	0	0	0	0	0	0	0	0	0	0	0.1	0.24	0.5	0.89	1.39	1.95	2.51	3.04	3.54
2		2,65	7,52	30,8	0	0	0	0	0	0	0	0	0	0	0	0	0	0	0	0	0	0	0	0	0	0	0	0	0	0	0	0	0	0	0	0	0	0	0	0	0.1	0.25	0.52	0.92	1.43	2	2.57	3.12	3.63
3		2,64	7,46	29,7	0	0	0	0	0	0	0	0	0	0	0	0	0	0	0	0	0	0	0	0	0	0	0	0	0	0	0	0	0	0	0	0	0	0	0	0	0.1	0.25	0.52	0.93	1.44	2.01	2.59	3.14	3.66
1	90.54	2,66	7,86	44,6	0	0	0	0	0	0	0	0	0	0	0	0	0	0	0	0	0	0	0	0	0	0	0	0	0	0	0	0	0	0	0	0	0	0	0	0.06	0.11	0.25	0.52	0.91	1.41	1.96	2.52	3.04	3.53
2		2,63	7,76	41,3	0	0	0	0	0	0	0	0	0	0	0	0	0	0	0	0	0	0	0	0	0	0	0	0	0	0	0	0	0	0	0	0	0	0.06	0.06	0.07	0.12	0.26	0.53	0.92	1.42	1.98	2.54	3.07	3.56
3		2,62	7,64	37,9	0	0	0	0	0	0	0	0	0	0	0	0	0	0	0	0	0	0	0	0	0	0	0	0	0	0	0	0	0	0	0	0	0	0.07	0.07	0.07	0.12	0.27	0.54	0.94	1.44	2	2.57	3.1	3.6
1	90.97	2,60	7,80	50,8	0	0	0	0	0	0	0	0	0	0	0	0	0	0	0	0	0	0	0	0	0	0	0	0	0	0	0	0	0	0	0	0	0.08	0.09	0.09	0.1	0.15	0.29	0.56	0.95	1.45	2	2.55	3.07	3.55
2		2,57	7,61	41,6	0	0	0	0	0	0	0	0	0	0	0	0	0	0	0	0	0	0	0	0	0	0	0	0	0	0	0	0	0	0	0	0.06	0.09	0.1	0.1	0.1	0.16	0.3	0.57	0.97	1.48	2.03	2.59	3.12	3.62
3		2,59	7,82	55,5	0	0	0	0	0	0	0	0	0	0	0	0	0	0	0	0	0	0	0	0	0	0	0	0	0	0	0	0	0	0	0	0.06	0.09	0.1	0.1	0.1	0.16	0.3	0.56	0.95	1.45	1.99	2.54	3.05	3.54
1	91.4	2,56	7,58	45,7	0	0	0	0	0	0	0	0	0	0	0	0	0	0	0	0	0	0	0	0	0	0	0	0	0	0	0	0	0	0	0	0	0.08	0.09	0.09	0.09	0.15	0.3	0.57	0.99	1.5	2.08	2.65	3.19	3.69
2		2,55	7,51	43,1	0	0	0	0	0	0	0	0	0	0	0	0	0	0	0	0	0	0	0	0	0	0	0	0	0	0	0	0	0	0	0	0.06	0.09	0.1	0.09	0.1	0.15	0.3	0.58	0.99	1.52	2.09	2.67	3.21	3.71
3		2,53	7,40	39,3	0	0	0	0	0	0	0	0	0	0	0	0	0	0	0	0	0	0	0	0	0	0	0	0	0	0	0	0	0	0	0	0.07	0.09	0.1	0.1	0.1	0.15	0.31	0.59	1.01	1.53	2.12	2.7	3.25	3.75
1	91.83	2,70	8,13	46,9	0	0	0	0	0	0	0	0	0	0	0	0	0	0	0	0	0	0	0	0	0	0	0	0	0	0	0	0	0	0	0	0	0	0	0	0	0.1	0.24	0.5	0.88	1.37	1.91	2.45	2.96	3.45
2		2,71	8,17	49,2	0	0	0	0	0	0	0	0	0	0	0	0	0	0	0	0	0	0	0	0	0	0	0	0	0	0	0	0	0	0	0	0	0	0	0	0	0.11	0.25	0.5	0.88	1.36	1.9	2.44	2.95	3.43
3		2,69	8,07	45,9	0	0	0	0	0	0	0	0	0	0	0	0	0	0	0	0	0	0	0	0	0	0	0	0	0	0	0	0	0	0	0	0	0	0	0	0	0.11	0.25	0.51	0.89	1.38	1.92	2.46	2.98	3.47
1	92.27	2,80	8,32	41,9	0	0	0	0	0	0	0	0	0	0	0	0	0	0	0	0	0	0	0	0	0	0	0	0	0	0	0	0	0	0	0	0	0	0	0	0	0	0.15	0.4	0.78	1.26	1.78	2.31	2.81	3.28
2		2,80	8,29	41,5	0	0	0	0	0	0	0	0	0	0	0	0	0	0	0	0	0	0	0	0	0	0	0	0	0	0	0	0	0	0	0	0	0	0	0	0	0	0.16	0.4	0.78	1.26	1.79	2.32	2.82	3.29
3		2,78	8,12	36,4	0	0	0	0	0	0	0	0	0	0	0	0	0	0	0	0	0	0	0	0	0	0	0	0	0	0	0	0	0	0	0	0	0	0	0	0	0	0.16	0.42	0.8	1.29	1.82	2.36	2.87	3.35
1	92.7	2,84	8,55	48,9	0	0	0	0	0	0	0	0	0	0	0	0	0	0	0	0	0	0	0	0	0	0	0	0	0	0	0	0	0	0	0	0	0	0	0	0	0	0.13	0.37	0.74	1.22	1.74	2.26	2.75	3.21
2		2,82	8,45	45,8	0	0	0	0	0	0	0	0	0	0	0	0	0	0	0	0	0	0	0	0	0	0	0	0	0	0	0	0	0	0	0	0	0	0	0	0	0	0.13	0.38	0.76	1.23	1.76	2.29	2.78	3.24
3		2,82	8,42	46,7	0	0	0	0	0	0	0	0	0	0	0	0	0	0	0	0	0	0	0	0	0	0	0	0	0	0	0	0	0	0	0	0	0	0	0	0	0	0.14	0.38	0.76	1.24	1.77	2.3	2.79	3.26
1	93.13	2,82	7,82	26,7	0	0	0	0	0	0	0	0	0	0	0	0	0	0	0	0	0	0	0	0	0	0	0	0	0	0	0	0	0	0	0	0	0	0	0	0	0	0.08	0.31	0.7	1.21	1.78	2.35	2.88	3.39
2		2,81	7,73	25,4	0	0	0	0	0	0	0	0	0	0	0	0	0	0	0	0	0	0	0	0	0	0	0	0	0	0	0	0	0	0	0	0	0	0	0	0	0	0.08	0.31	0.71	1.23	1.8	2.38	2.92	3.43
3		2,82	7,81	26,9	0	0	0	0	0	0	0	0	0	0	0	0	0	0	0	0	0	0	0	0	0	0	0	0	0	0	0	0	0	0	0	0	0	0	0	0	0	0.08	0.31	0.7	1.22	1.79	2.35	2.89	3.4
1	93.56	2,64	7,53	30,0	0	0	0	0	0	0	0	0	0	0	0	0	0	0	0	0	0	0	0	0	0	0	0	0	0	0	0	0	0	0	0	0	0	0	0	0	0.1	0.26	0.53	0.94	1.44	2.01	2.57	3.11	3.62
2		2,62	7,41	27,4	0	0	0	0	0	0	0	0	0	0	0	0	0	0	0	0	0	0	0	0	0	0	0	0	0	0	0	0	0	0	0	0	0	0	0	0	0.11	0.27	0.55	0.96	1.47	2.04	2.61	3.16	3.67
3		2,61	7,33	25,9	0	0	0	0	0	0	0	0	0	0	0	0	0	0	0	0	0	0	0	0	0	0	0	0	0	0	0	0	0	0	0	0	0	0	0	0	0.12	0.27	0.56	0.97	1.49	2.06	2.64	3.19	3.71
1	93.99	2,81	8,23	42,8	0	0	0	0	0	0	0	0	0	0	0	0	0	0	0	0	0	0	0	0	0	0	0	0	0	0	0	0	0	0	0	0	0	0	0	0	0	0.17	0.41	0.78	1.24	1.76	2.28	2.79	3.28
2		2,77	7,93	31,6	0	0	0	0	0	0	0	0	0	0	0	0	0	0	0	0	0	0	0	0	0	0	0	0	0	0	0	0	0	0	0	0	0	0	0	0	0	0.18	0.44	0.81	1.29	1.82	2.36	2.88	3.39
3		2,77	7,94	32,0	0	0	0	0	0	0	0	0	0	0	0	0	0	0	0	0	0	0	0	0	0	0	0	0	0	0	0	0	0	0	0	0	0	0	0	0	0	0.19	0.44	0.81	1.29	1.82	2.36	2.88	3.39
1	94.42	2,75	8,09	38,3	0	0	0	0	0	0	0	0	0	0	0	0	0	0	0	0	0	0	0	0	0	0	0	0	0	0	0	0	0	0	0	0	0	0	0	0	0.08	0.22	0.47	0.84	1.3	1.82	2.35	2.87	3.37
2		2,74	8,01	35,4	0	0	0	0	0	0	0	0	0	0	0	0	0	0	0	0	0	0	0	0	0	0	0	0	0	0	0	0	0	0	0	0	0	0	0	0	0.09	0.23	0.48	0.85	1.32	1.84	2.38	2.9	3.4
3		2,73	7,91	33,1	0	0	0	0	0	0	0	0	0	0	0	0	0	0	0	0	0	0	0	0	0	0	0	0	0	0	0	0	0	0	0	0	0	0	0	0	0.09	0.23	0.48	0.86	1.33	1.86	2.4	2.93	3.43
1	94.86	2,75	7,99	41,9	0	0	0	0	0	0	0	0	0	0	0	0	0	0	0	0	0	0	0	0	0	0	0	0	0	0	0	0	0	0	0	0	0	0	0	0	0.07	0.21	0.46	0.83	1.3	1.83	2.37	2.88	3.38
2		2,72	7,75	32,3	0	0	0	0	0	0	0	0	0	0	0	0	0	0	0	0	0	0	0	0	0	0	0	0	0	0	0	0	0	0	0	0	0	0	0	0	0.08	0.22	0.48	0.86	1.34	1.88	2.43	2.96	3.47
3		2,71	7,67	30,2	0	0	0	0	0	0	0	0	0	0	0	0	0	0	0	0	0	0	0	0	0	0	0	0	0	0	0	0	0	0	0	0	0	0	0	0	0.08	0.23	0.49	0.87	1.36	1.9	2.46	2.99	3.51
1	95.29	2,79	7,92	35,2	0	0	0	0	0	0	0	0	0	0	0	0	0	0	0	0	0	0	0	0	0	0	0	0	0	0	0	0	0	0	0	0	0	0	0	0	0	0.12	0.37	0.76	1.26	1.82	2.38	2.91	3.42
2		2,78	7,84	33,2	0	0	0	0	0	0	0	0	0	0	0	0	0	0	0	0	0	0	0	0	0	0	0	0	0	0	0	0	0	0	0	0	0	0	0	0	0	0.13	0.38	0.78	1.28	1.84	2.4	2.94	3.45
3		2,78	7,89	34,7	0	0	0	0	0	0	0	0	0	0	0	0	0	0	0	0	0	0	0	0	0	0	0	0	0	0	0	0	0	0	0	0	0	0	0	0	0	0.13	0.38	0.77	1.27	1.83	2.39	2.92	3.43
1	95.72	2,73	8,23	57,9	0	0	0	0	0	0	0	0	0	0	0	0	0	0	0	0	0	0	0	0	0	0	0	0	0	0	0	0	0	0	0	0	0	0	0	0	0.11	0.25	0.5	0.86	1.33	1.84	2.37	2.88	3.36
2		2,68	7,82	36,4	0	0	0	0	0	0	0	0	0	0	0	0	0	0	0	0	0	0	0	0	0	0	0	0	0	0	0	0	0	0	0	0	0	0	0	0.06	0.12	0.26	0.52	0.9	1.38	1.92	2.47	3	3.5
3		2,69	7,94	41,9	0	0	0	0	0	0	0	0	0	0	0	0	0	0	0	0	0	0	0	0	0	0	0	0	0	0	0	0	0	0	0	0	0	0	0	0.06	0.12	0.26	0.52	0.89	1.37	1.9	2.44	2.96	3.46
1	96.15	2,67	8,47	80,5	0	0	0	0	0	0	0	0	0	0	0	0	0	0	0	0	0	0	0	0	0	0	0	0	0	0	0	0	0	0	0	0.07	0.09	0.1	0.09	0.1	0.15	0.28	0.53	0.89	1.34	1.85	2.36	2.85	3.31
2		2,66	8,44	80,2	0	0	0	0	0	0	0	0	0	0	0	0	0	0	0	0	0	0	0	0	0	0	0	0	0	0	0	0	0	0	0	0.07	0.09	0.1	0.1	0.1	0.15	0.29	0.53	0.89	1.35	1.85	2.36	2.85	3.31
3		2,65	8,34	81,2	0	0	0	0	0	0	0	0	0	0	0	0	0	0	0	0	0	0	0	0	0	0	0	0	0	0	0	0	0	0	0	0.07	0.1	0.1	0.1	0.1	0.16	0.29	0.54	0.9	1.36	1.87	2.38	2.88	3.34
1	96.58	2,54	7,23	36,8	0	0	0	0	0	0	0	0	0	0	0	0	0	0	0	0	0	0	0	0	0	0	0	0	0	0	0	0	0	0	0	0	0.08	0.09	0.09	0.09	0.14	0.29	0.58	1	1.53	2.13	2.73	3.29	3.81
2		2,51	7,09	32,1	0	0	0	0	0	0	0	0	0	0	0	0	0	0	0	0	0	0	0	0	0	0	0	0	0	0	0	0	0	0	0	0.06	0.09	0.1	0.1	0.1	0.15	0.3	0.59	1.02	1.56	2.16	2.77	3.34	3.87
3		2,50	7,00	29,6	0	0	0	0	0	0	0	0	0	0	0	0	0	0	0	0	0	0	0	0	0	0	0	0	0	0	0	0	0	0	0	0.06	0.1	0.11	0.1	0.1	0.16	0.31	0.6	1.03	1.58	2.19	2.8	3.38	3.91
1	97.02	2,75	8,09	46,2	0	0	0	0	0	0	0	0	0	0	0	0	0	0	0	0	0	0	0	0	0	0	0	0	0	0	0	0	0	0	0	0	0	0	0	0	0	0.19	0.45	0.83	1.32	1.86	2.41	2.93	3.42
2		2,74	8,01	42,4	0	0	0	0	0	0	0	0	0	0	0	0	0	0	0	0	0	0	0	0	0	0	0	0	0	0	0	0	0	0	0	0	0	0	0	0	0	0.2	0.45	0.84	1.33	1.88	2.43	2.95	3.45
3		2,71	7,84	37,7	0	0	0	0	0	0	0	0	0	0	0	0	0	0	0	0	0	0	0	0	0	0	0	0	0	0	0	0	0	0	0	0	0	0	0	0	0.06	0.21	0.47	0.86	1.36	1.91	2.47	3	3.51
1	97.45	2,64	8,25	64,5	0	0	0	0	0	0	0	0	0	0	0	0	0	0	0	0	0	0	0	0	0	0	0	0	0	0	0	0	0	0	0	0.06	0.08	0.09	0.08	0.08	0.14	0.28	0.54	0.92	1.39	1.92	2.45	2.95	3.42
2		2,63	8,16	60,1	0	0	0	0	0	0	0	0	0	0	0	0	0	0	0	0	0	0	0	0	0	0	0	0	0	0	0	0	0	0	0	0.07	0.09	0.09	0.08	0.09	0.14	0.28	0.54	0.93	1.4	1.93	2.46	2.97	3.45
3		2,62	8,12	59,5	0	0	0	0	0	0	0	0	0	0	0	0	0	0	0	0	0	0	0	0	0	0	0	0	0	0	0	0	0	0	0	0.07	0.09	0.09	0.08	0.09	0.14	0.29	0.55	0.93	1.41	1.94	2.47	2.98	3.46
1	97.88	2,87	9,46	98,3	0	0	0	0	0	0	0	0	0	0	0	0	0	0	0	0	0	0	0	0	0	0	0	0	0	0	0	0	0	0	0	0	0	0	0	0	0	0.16	0.4	0.75	1.19	1.68	2.18	2.64	3.07
2		2,87	9,50	108	0	0	0	0	0	0	0	0	0	0	0	0	0	0	0	0	0	0	0	0	0	0	0	0	0	0	0	0	0	0	0	0	0	0	0	0	0	0.17	0.4	0.75	1.19	1.68	2.17	2.63	3.06
3		2,85	9,32	88,3	0	0	0	0	0	0	0	0	0	0	0	0	0	0	0	0	0	0	0	0	0	0	0	0	0	0	0	0	0	0	0	0	0	0	0	0	0	0.17	0.41	0.76	1.21	1.7	2.2	2.67	3.1
1	98.31	2,68	9,03	97,8	0	0	0	0	0	0	0	0	0	0	0	0	0	0	0	0	0	0	0	0	0	0	0	0	0	0	0	0	0	0	0	0	0.08	0.09	0.09	0.09	0.14	0.26	0.51	0.88	1.35	1.86	2.38	2.85	3.28
2		2,66	8,80	80,3	0	0	0	0	0	0	0	0	0	0	0	0	0	0	0	0	0	0	0	0	0	0	0	0	0	0	0	0	0	0	0	0	0.08	0.1	0.09	0.1	0.14	0.27	0.52	0.89	1.37	1.89	2.42	2.9	3.34
3		2,72	9,54	143	0	0	0	0	0	0	0	0	0	0	0	0	0	0	0	0	0	0	0	0	0	0	0	0	0	0	0	0	0	0	0	0	0.08	0.09	0.09	0.09	0.13	0.25	0.49	0.85	1.3	1.8	2.3	2.76	3.17
1	98.74	2,60	8,21	53,8	0	0	0	0	0	0	0	0	0	0	0	0	0	0	0	0	0	0	0	0	0	0	0	0	0	0	0	0	0	0	0	0.07	0.09	0.11	0.11	0.12	0.17	0.31	0.57	0.95	1.43	1.96	2.49	2.98	3.44
2		2,60	8,24	56,9	0	0	0	0	0	0	0	0	0	0	0	0	0	0	0	0	0	0	0	0	0	0	0	0	0	0	0	0	0	0	0	0.07	0.1	0.11	0.11	0.12	0.17	0.31	0.57	0.95	1.42	1.95	2.48	2.97	3.43
3		2,59	8,21	57,0	0	0	0	0	0	0	0	0	0	0	0	0	0	0	0	0	0	0	0	0	0	0	0	0	0	0	0	0	0	0	0	0.07	0.1	0.12	0.11	0.12	0.18	0.32	0.57	0.95	1.43	1.96	2.48	2.98	3.43
1	99.17	2,77	8,95	69,5	0	0	0	0	0	0	0	0	0	0	0	0	0	0	0	0	0	0	0	0	0	0	0	0	0	0	0	0	0	0	0	0	0	0	0	0	0.08	0.21	0.45	0.82	1.29	1.81	2.33	2.81	3.25
2		2,75	8,75	58,6	0	0	0	0	0	0	0	0	0	0	0	0	0	0	0	0	0	0	0	0	0	0	0	0	0	0	0	0	0	0	0	0	0	0	0	0	0.08	0.21	0.46	0.83	1.31	1.84	2.37	2.85	3.3
3		2,77	8,94	66,5	0	0	0	0	0	0	0	0	0	0	0	0	0	0	0	0	0	0	0	0	0	0	0	0	0	0	0	0	0	0	0	0	0	0	0	0	0.09	0.21	0.46	0.82	1.29	1.81	2.33	2.81	3.25
1	99.61	2,71	8,46	53,9	0	0	0	0	0	0	0	0	0	0	0	0	0	0	0	0	0	0	0	0	0	0	0	0	0	0	0	0	0	0	0	0	0	0	0	0	0.11	0.24	0.5	0.88	1.36	1.9	2.44	2.94	3.4
2		2,69	8,39	50,7	0	0	0	0	0	0	0	0	0	0	0	0	0	0	0	0	0	0	0	0	0	0	0	0	0	0	0	0	0	0	0	0	0	0	0	0.06	0.11	0.24	0.5	0.88	1.37	1.91	2.45	2.95	3.41
3		2,69	8,36	48,3	0	0	0	0	0	0	0	0	0	0	0	0	0	0	0	0	0	0	0	0	0	0	0	0	0	0	0	0	0	0	0	0	0	0	0	0.06	0.11	0.25	0.5	0.89	1.38	1.92	2.45	2.96	3.42
1	100.04	2,89	9,25	57,3	0	0	0	0	0	0	0	0	0	0	0	0	0	0	0	0	0	0	0	0	0	0	0	0	0	0	0	0	0	0	0	0	0	0	0	0	0	0.13	0.35	0.71	1.16	1.66	2.16	2.63	3.07
2		2,87	9,10	52,3	0	0	0	0	0	0	0	0	0	0	0	0	0	0	0	0	0	0	0	0	0	0	0	0	0	0	0	0	0	0	0	0	0	0	0	0	0	0.13	0.36	0.72	1.18	1.68	2.19	2.66	3.1
3		2,87	9,11	52,6	0	0	0	0	0	0	0	0	0	0	0	0	0	0	0	0	0	0	0	0	0	0	0	0	0	0	0	0	0	0	0	0	0	0	0	0	0	0.14	0.37	0.72	1.18	1.69	2.19	2.67	3.11
1	100.47	2,62	8,03	44,0	0	0	0	0	0	0	0	0	0	0	0	0	0	0	0	0	0	0	0	0	0	0	0	0	0	0	0	0	0	0	0	0	0.08	0.09	0.08	0.09	0.14	0.28	0.54	0.93	1.42	1.96	2.5	3.02	3.5
2		2,61	8,01	43,2	0	0	0	0	0	0	0	0	0	0	0	0	0	0	0	0	0	0	0	0	0	0	0	0	0	0	0	0	0	0	0	0.06	0.08	0.09	0.08	0.09	0.14	0.29	0.55	0.93	1.42	1.96	2.5	3.02	3.5
3		2,61	7,97	41,7	0	0	0	0	0	0	0	0	0	0	0	0	0	0	0	0	0	0	0	0	0	0	0	0	0	0	0	0	0	0	0	0.06	0.09	0.09	0.09	0.09	0.15	0.29	0.55	0.94	1.42	1.96	2.51	3.03	3.51
1	100.9	2,83	8,87	40,8	0	0	0	0	0	0	0	0	0	0	0	0	0	0	0	0	0	0	0	0	0	0	0	0	0	0	0	0	0	0	0	0	0	0	0	0	0	0.13	0.37	0.75	1.22	1.75	2.27	2.75	3.2
2		2,83	8,76	38,6	0	0	0	0	0	0	0	0	0	0	0	0	0	0	0	0	0	0	0	0	0	0	0	0	0	0	0	0	0	0	0	0	0	0	0	0	0	0.14	0.38	0.76	1.23	1.76	2.28	2.77	3.21
3		2,82	8,70	37,2	0	0	0	0	0	0	0	0	0	0	0	0	0	0	0	0	0	0	0	0	0	0	0	0	0	0	0	0	0	0	0	0	0	0	0	0	0	0.14	0.39	0.76	1.24	1.77	2.3	2.78	3.23
1	101.33	2,82	8,65	41,0	0	0	0	0	0	0	0	0	0	0	0	0	0	0	0	0	0	0	0	0	0	0	0	0	0	0	0	0	0	0	0	0	0	0	0	0	0	0.14	0.38	0.76	1.24	1.77	2.3	2.8	3.26
2		2,82	8,71	42,6	0	0	0	0	0	0	0	0	0	0	0	0	0	0	0	0	0	0	0	0	0	0	0	0	0	0	0	0	0	0	0	0	0	0	0	0	0	0.14	0.38	0.75	1.23	1.76	2.29	2.78	3.24
3		2,81	8,64	40,6	0	0	0	0	0	0	0	0	0	0	0	0	0	0	0	0	0	0	0	0	0	0	0	0	0	0	0	0	0	0	0	0	0	0	0	0	0	0.14	0.38	0.76	1.24	1.77	2.31	2.8	3.26
1	101.77	2,79	8,72	50,3	0	0	0	0	0	0	0	0	0	0	0	0	0	0	0	0	0	0	0	0	0	0	0	0	0	0	0	0	0	0	0	0	0	0	0	0	0.09	0.23	0.47	0.82	1.27	1.76	2.26	2.74	3.2
2		2,80	8,78	54,1	0	0	0	0	0	0	0	0	0	0	0	0	0	0	0	0	0	0	0	0	0	0	0	0	0	0	0	0	0	0	0	0	0	0	0	0	0.09	0.23	0.47	0.82	1.26	1.75	2.25	2.73	3.18
3		2,80	8,78	54,2	0	0	0	0	0	0	0	0	0	0	0	0	0	0	0	0	0	0	0	0	0	0	0	0	0	0	0	0	0	0	0	0	0	0	0	0	0.09	0.23	0.47	0.82	1.26	1.75	2.25	2.73	3.18
1	102.2	2,73	8,55	59,4	0	0	0	0	0	0	0	0	0	0	0	0	0	0	0	0	0	0	0	0	0	0	0	0	0	0	0	0	0	0	0	0	0	0	0	0	0.1	0.23	0.49	0.86	1.34	1.87	2.4	2.89	3.35
2		2,74	8,67	65,7	0	0	0	0	0	0	0	0	0	0	0	0	0	0	0	0	0	0	0	0	0	0	0	0	0	0	0	0	0	0	0	0	0	0	0	0	0.1	0.23	0.48	0.86	1.33	1.85	2.38	2.86	3.32
3		2,74	8,63	65,2	0	0	0	0	0	0	0	0	0	0	0	0	0	0	0	0	0	0	0	0	0	0	0	0	0	0	0	0	0	0	0	0	0	0	0	0	0.1	0.23	0.49	0.86	1.33	1.86	2.38	2.87	3.32
1	102.63	2,80	9,41	105	0	0	0	0	0	0	0	0	0	0	0	0	0	0	0	0	0	0	0	0	0	0	0	0	0	0	0	0	0	0	0	0	0	0	0	0	0.1	0.24	0.47	0.82	1.26	1.74	2.23	2.69	3.11
2		2,82	9,56	131	0	0	0	0	0	0	0	0	0	0	0	0	0	0	0	0	0	0	0	0	0	0	0	0	0	0	0	0	0	0	0	0	0	0	0	0	0.1	0.24	0.47	0.81	1.24	1.72	2.2	2.65	3.08
3		2,82	9,61	148	0	0	0	0	0	0	0	0	0	0	0	0	0	0	0	0	0	0	0	0	0	0	0	0	0	0	0	0	0	0	0	0	0	0	0	0	0.1	0.24	0.47	0.81	1.24	1.71	2.19	2.64	3.06
1	103.06	2,66	8,18	58,1	0	0	0	0	0	0	0	0	0	0	0	0	0	0	0	0	0	0	0	0	0	0	0	0	0	0	0	0	0	0	0	0	0	0	0	0	0.12	0.26	0.53	0.93	1.42	1.97	2.51	3.02	3.48
2		2,66	8,12	53,7	0	0	0	0	0	0	0	0	0	0	0	0	0	0	0	0	0	0	0	0	0	0	0	0	0	0	0	0	0	0	0	0	0	0	0	0	0.12	0.27	0.54	0.93	1.43	1.98	2.52	3.03	3.5
3		2,65	8,15	55,3	0	0	0	0	0	0	0	0	0	0	0	0	0	0	0	0	0	0	0	0	0	0	0	0	0	0	0	0	0	0	0	0	0	0	0	0.06	0.12	0.27	0.54	0.93	1.43	1.97	2.51	3.02	3.48
1	103.49	2,76	8,80	74,7	0	0	0	0	0	0	0	0	0	0	0	0	0	0	0	0	0	0	0	0	0	0	0	0	0	0	0	0	0	0	0	0	0	0	0	0	0.06	0.2	0.46	0.84	1.32	1.85	2.37	2.85	3.3
2		2,77	8,93	85,1	0	0	0	0	0	0	0	0	0	0	0	0	0	0	0	0	0	0	0	0	0	0	0	0	0	0	0	0	0	0	0	0	0	0	0	0	0.06	0.2	0.46	0.84	1.31	1.83	2.34	2.82	3.26
3		2,75	8,77	74,5	0	0	0	0	0	0	0	0	0	0	0	0	0	0	0	0	0	0	0	0	0	0	0	0	0	0	0	0	0	0	0	0	0	0	0	0	0.07	0.21	0.47	0.85	1.32	1.85	2.37	2.85	3.3
1	103.93	2,82	9,41	96,7	0	0	0	0	0	0	0	0	0	0	0	0	0	0	0	0	0	0	0	0	0	0	0	0	0	0	0	0	0	0	0	0	0	0	0	0	0	0.17	0.42	0.79	1.25	1.76	2.26	2.72	3.15
2		2,81	9,26	84,3	0	0	0	0	0	0	0	0	0	0	0	0	0	0	0	0	0	0	0	0	0	0	0	0	0	0	0	0	0	0	0	0	0	0	0	0	0	0.18	0.43	0.8	1.26	1.77	2.28	2.75	3.18
3		2,80	9,15	76,1	0	0	0	0	0	0	0	0	0	0	0	0	0	0	0	0	0	0	0	0	0	0	0	0	0	0	0	0	0	0	0	0	0	0	0	0	0	0.18	0.43	0.8	1.27	1.78	2.29	2.77	3.2
1	104.36	2,88	10,1	88,9	0	0	0	0	0	0	0	0	0	0	0	0	0	0	0	0	0	0	0	0	0	0	0	0	0	0	0	0	0	0	0	0	0	0	0	0	0	0.18	0.42	0.76	1.2	1.67	2.14	2.58	2.98
2		2,88	10,2	98,2	0	0	0	0	0	0	0	0	0	0	0	0	0	0	0	0	0	0	0	0	0	0	0	0	0	0	0	0	0	0	0	0	0	0	0	0	0	0.18	0.42	0.76	1.19	1.66	2.13	2.56	2.96
3		2,87	9,94	85,8	0	0	0	0	0	0	0	0	0	0	0	0	0	0	0	0	0	0	0	0	0	0	0	0	0	0	0	0	0	0	0	0	0	0	0	0	0	0.19	0.42	0.77	1.21	1.68	2.16	2.59	3
1	104.79	3,19	15,3	293	0	0	0	0	0	0	0	0	0	0	0	0	0	0	0	0	0	0	0	0	0	0	0	0	0	0	0	0	0	0	0	0	0	0	0	0	0.07	0.17	0.35	0.63	0.97	1.34	1.71	2.04	2.33
2		3,19	15,2	337	0	0	0	0	0	0	0	0	0	0	0	0	0	0	0	0	0	0	0	0	0	0	0	0	0	0	0	0	0	0	0	0	0	0	0	0	0.07	0.17	0.35	0.62	0.97	1.34	1.7	2.03	2.33
3		3,14	14,2	255	0	0	0	0	0	0	0	0	0	0	0	0	0	0	0	0	0	0	0	0	0	0	0	0	0	0	0	0	0	0	0	0	0	0	0	0	0.07	0.18	0.36	0.65	1	1.38	1.76	2.1	2.4
1	105.22	3,16	13,4	240	0	0	0	0	0	0	0	0	0	0	0	0	0	0	0	0	0	0	0	0	0	0	0	0	0	0	0	0	0	0	0	0	0	0	0	0	0	0.13	0.32	0.61	0.97	1.37	1.76	2.12	2.46
2		3,10	12,3	153	0	0	0	0	0	0	0	0	0	0	0	0	0	0	0	0	0	0	0	0	0	0	0	0	0	0	0	0	0	0	0	0	0	0	0	0	0	0.13	0.33	0.64	1.02	1.43	1.84	2.22	2.56
3		3,12	12,7	195	0	0	0	0	0	0	0	0	0	0	0	0	0	0	0	0	0	0	0	0	0	0	0	0	0	0	0	0	0	0	0	0	0	0	0	0	0	0.13	0.33	0.63	1	1.41	1.81	2.18	2.52
1	105.65	3,06	13,0	234	0	0	0	0	0	0	0	0	0	0	0	0	0	0	0	0	0	0	0	0	0	0	0	0	0	0	0	0	0	0	0	0	0	0	0	0	0	0.16	0.37	0.67	1.05	1.47	1.87	2.24	2.58
2		3,04	12,5	195	0	0	0	0	0	0	0	0	0	0	0	0	0	0	0	0	0	0	0	0	0	0	0	0	0	0	0	0	0	0	0	0	0	0	0	0	0	0.17	0.38	0.68	1.07	1.49	1.9	2.27	2.61
3		3,02	12,3	171	0	0	0	0	0	0	0	0	0	0	0	0	0	0	0	0	0	0	0	0	0	0	0	0	0	0	0	0	0	0	0	0	0	0	0	0	0	0.17	0.38	0.69	1.08	1.5	1.92	2.3	2.64
1	106.08	2,83	9,42	81,9	0	0	0	0	0	0	0	0	0	0	0	0	0	0	0	0	0	0	0	0	0	0	0	0	0	0	0	0	0	0	0	0	0	0	0	0	0	0.16	0.41	0.78	1.24	1.75	2.24	2.69	3.1
2		2,83	9,40	81,1	0	0	0	0	0	0	0	0	0	0	0	0	0	0	0	0	0	0	0	0	0	0	0	0	0	0	0	0	0	0	0	0	0	0	0	0	0	0.16	0.41	0.78	1.25	1.75	2.25	2.7	3.11
3		2,84	9,49	86,3	0	0	0	0	0	0	0	0	0	0	0	0	0	0	0	0	0	0	0	0	0	0	0	0	0	0	0	0	0	0	0	0	0	0	0	0	0	0.16	0.41	0.78	1.24	1.74	2.23	2.68	3.09
1	106.52	3,02	13,0	244	0	0	0	0	0	0	0	0	0	0	0	0	0	0	0	0	0	0	0	0	0	0	0	0	0	0	0	0	0	0	0	0	0	0	0	0	0.1	0.22	0.42	0.71	1.08	1.48	1.87	2.23	2.54
2		2,99	12,5	214	0	0	0	0	0	0	0	0	0	0	0	0	0	0	0	0	0	0	0	0	0	0	0	0	0	0	0	0	0	0	0	0	0	0	0	0	0.11	0.22	0.43	0.73	1.1	1.51	1.91	2.27	2.59
3		2,98	12,4	212	0	0	0	0	0	0	0	0	0	0	0	0	0	0	0	0	0	0	0	0	0	0	0	0	0	0	0	0	0	0	0	0	0	0	0	0.06	0.11	0.22	0.43	0.73	1.1	1.51	1.91	2.27	2.59
1	106.95	2,91	11,9	150	0	0	0	0	0	0	0	0	0	0	0	0	0	0	0	0	0	0	0	0	0	0	0	0	0	0	0	0	0	0	0	0	0	0	0	0	0.1	0.22	0.45	0.77	1.18	1.62	2.04	2.43	2.77
2		2,90	11,9	157	0	0	0	0	0	0	0	0	0	0	0	0	0	0	0	0	0	0	0	0	0	0	0	0	0	0	0	0	0	0	0	0	0	0	0	0	0.1	0.22	0.45	0.77	1.18	1.62	2.05	2.43	2.78
3		2,92	12,1	176	0	0	0	0	0	0	0	0	0	0	0	0	0	0	0	0	0	0	0	0	0	0	0	0	0	0	0	0	0	0	0	0	0	0	0	0	0.1	0.22	0.44	0.77	1.17	1.6	2.03	2.41	2.75
1	107.38	2,83	10,7	101	0	0	0	0	0	0	0	0	0	0	0	0	0	0	0	0	0	0	0	0	0	0	0	0	0	0	0	0	0	0	0	0	0	0.07	0.08	0.1	0.14	0.26	0.48	0.81	1.21	1.65	2.08	2.48	2.83
2		2,82	10,5	101	0	0	0	0	0	0	0	0	0	0	0	0	0	0	0	0	0	0	0	0	0	0	0	0	0	0	0	0	0	0	0	0	0	0.07	0.08	0.1	0.14	0.26	0.49	0.81	1.22	1.67	2.1	2.5	2.86
3		2,82	10,5	113	0	0	0	0	0	0	0	0	0	0	0	0	0	0	0	0	0	0	0	0	0	0	0	0	0	0	0	0	0	0	0	0	0	0.07	0.08	0.1	0.14	0.26	0.48	0.81	1.22	1.67	2.1	2.5	2.86
1	107.81	3,11	16,8	372	0	0	0	0	0	0	0	0	0	0	0	0	0	0	0	0	0	0	0	0	0	0	0	0	0	0	0	0	0	0	0	0	0.09	0.11	0.12	0.12	0.14	0.23	0.4	0.66	0.98	1.34	1.67	1.98	2.24
2		3,04	15,3	284	0	0	0	0	0	0	0	0	0	0	0	0	0	0	0	0	0	0	0	0	0	0	0	0	0	0	0	0	0	0	0	0	0.09	0.12	0.12	0.12	0.15	0.24	0.42	0.69	1.02	1.39	1.74	2.06	2.34
3		3,04	15,2	350	0	0	0	0	0	0	0	0	0	0	0	0	0	0	0	0	0	0	0	0	0	0	0	0	0	0	0	0	0	0	0	0	0.1	0.12	0.13	0.13	0.15	0.24	0.42	0.68	1.02	1.39	1.74	2.06	2.34
1	109.34	2,60	9,51	109	0	0	0	0	0	0	0	0	0	0	0	0	0	0	0	0	0	0	0	0	0	0	0	0	0	0	0	0	0	0	0	0.09	0.15	0.18	0.19	0.18	0.22	0.33	0.57	0.93	1.38	1.87	2.34	2.75	3.11
2		2,62	9,72	136	0	0	0	0	0	0	0	0	0	0	0	0	0	0	0	0	0	0	0	0	0	0	0	0	0	0	0	0	0	0	0	0.09	0.15	0.18	0.18	0.18	0.21	0.33	0.56	0.92	1.36	1.84	2.31	2.71	3.07
3		2,60	9,53	122	0	0	0	0	0	0	0	0	0	0	0	0	0	0	0	0	0	0	0	0	0	0	0	0	0	0	0	0	0	0	0	0.1	0.15	0.19	0.19	0.19	0.22	0.33	0.57	0.93	1.38	1.87	2.33	2.75	3.11
1	111.04	2,45	8,45	44,7	0	0	0	0	0	0	0	0	0	0	0	0	0	0	0	0	0	0	0	0	0	0	0	0	0	0	0	0	0	0	0.08	0.16	0.22	0.26	0.26	0.26	0.29	0.41	0.67	1.05	1.52	2.03	2.52	2.95	3.33
2		2,43	8,30	42,8	0	0	0	0	0	0	0	0	0	0	0	0	0	0	0	0	0	0	0	0	0	0	0	0	0	0	0	0	0	0	0.08	0.16	0.23	0.27	0.27	0.26	0.29	0.42	0.67	1.06	1.54	2.06	2.55	2.99	3.37
3		2,43	8,30	45,0	0	0	0	0	0	0	0	0	0	0	0	0	0	0	0	0	0	0	0	0	0	0	0	0	0	0	0	0	0	0	0.09	0.16	0.23	0.27	0.27	0.26	0.3	0.42	0.68	1.06	1.54	2.05	2.55	2.98	3.37
1	111.62	2,59	11,3	77,0	0	0	0	0	0	0	0	0	0	0	0	0	0	0	0	0	0	0	0	0	0	0	0	0	0	0	0	0	0	0	0.12	0.2	0.26	0.28	0.27	0.25	0.27	0.37	0.58	0.91	1.31	1.73	2.13	2.47	2.76
2		2,53	10,5	57,8	0	0	0	0	0	0	0	0	0	0	0	0	0	0	0	0	0	0	0	0	0	0	0	0	0	0	0	0	0	0	0.13	0.21	0.28	0.3	0.28	0.26	0.28	0.38	0.61	0.95	1.37	1.81	2.22	2.58	2.88
3		2,53	10,5	58,5	0	0	0	0	0	0	0	0	0	0	0	0	0	0	0	0	0	0	0	0	0	0	0	0	0	0	0	0	0	0	0.13	0.21	0.28	0.3	0.28	0.26	0.28	0.38	0.61	0.95	1.37	1.81	2.22	2.57	2.87
1	112.76	2,60	11,5	61,6	0	0	0	0	0	0	0	0	0	0	0	0	0	0	0	0	0	0	0	0	0	0	0	0	0	0	0	0	0	0.07	0.15	0.23	0.28	0.3	0.28	0.26	0.27	0.37	0.58	0.89	1.28	1.68	2.06	2.39	2.67
2		2,61	11,8	65,4	0	0	0	0	0	0	0	0	0	0	0	0	0	0	0	0	0	0	0	0	0	0	0	0	0	0	0	0	0	0.07	0.15	0.23	0.28	0.29	0.28	0.25	0.27	0.37	0.57	0.88	1.26	1.66	2.04	2.36	2.64
3		2,59	11,6	64,0	0	0	0	0	0	0	0	0	0	0	0	0	0	0	0	0	0	0	0	0	0	0	0	0	0	0	0	0	0	0.07	0.15	0.23	0.28	0.3	0.28	0.26	0.28	0.37	0.58	0.9	1.28	1.68	2.06	2.39	2.67
1	113.9	2,72	12,7	70,3	0	0	0	0	0	0	0	0	0	0	0	0	0	0	0	0	0	0	0	0	0	0	0	0	0	0	0	0	0	0	0.13	0.2	0.26	0.28	0.27	0.24	0.25	0.33	0.52	0.82	1.18	1.56	1.91	2.22	2.48
2		2,73	12,8	70,8	0	0	0	0	0	0	0	0	0	0	0	0	0	0	0	0	0	0	0	0	0	0	0	0	0	0	0	0	0	0	0.13	0.21	0.26	0.28	0.27	0.24	0.25	0.33	0.52	0.81	1.17	1.55	1.9	2.21	2.47
3		2,72	12,8	74,0	0	0	0	0	0	0	0	0	0	0	0	0	0	0	0	0	0	0	0	0	0	0	0	0	0	0	0	0	0	0	0.13	0.21	0.26	0.28	0.27	0.24	0.25	0.34	0.53	0.82	1.18	1.55	1.91	2.21	2.47
1	115.04	2,65	10,8	55,7	0	0	0	0	0	0	0	0	0	0	0	0	0	0	0	0	0	0	0	0	0	0	0	0	0	0	0	0	0	0.07	0.15	0.24	0.3	0.32	0.3	0.27	0.27	0.35	0.55	0.84	1.21	1.59	1.95	2.28	2.57
2		2,63	10,7	54,3	0	0	0	0	0	0	0	0	0	0	0	0	0	0	0	0	0	0	0	0	0	0	0	0	0	0	0	0	0	0.07	0.16	0.24	0.3	0.32	0.3	0.27	0.27	0.36	0.55	0.85	1.22	1.61	1.97	2.3	2.59
3		2,65	11,0	60,4	0	0	0	0	0	0	0	0	0	0	0	0	0	0	0	0	0	0	0	0	0	0	0	0	0	0	0	0	0	0.07	0.16	0.24	0.3	0.32	0.3	0.27	0.27	0.35	0.54	0.84	1.2	1.58	1.94	2.26	2.55
1	116.18	2,51	10,1	57,1	0	0	0	0	0	0	0	0	0	0	0	0	0	0	0	0	0	0	0	0	0	0	0	0	0	0	0	0	0	0.08	0.17	0.27	0.34	0.36	0.33	0.29	0.28	0.38	0.59	0.92	1.34	1.77	2.17	2.52	2.82
2		2,51	10,0	56,0	0	0	0	0	0	0	0	0	0	0	0	0	0	0	0	0	0	0	0	0	0	0	0	0	0	0	0	0	0	0.08	0.18	0.28	0.34	0.36	0.33	0.29	0.29	0.38	0.59	0.93	1.34	1.77	2.17	2.52	2.82
3		2,52	10,2	60,0	0	0	0	0	0	0	0	0	0	0	0	0	0	0	0	0	0	0	0	0	0	0	0	0	0	0	0	0	0	0.08	0.18	0.27	0.34	0.36	0.33	0.29	0.29	0.38	0.59	0.92	1.32	1.75	2.15	2.49	2.79
1	117.32	2,70	12,3	87,5	0	0	0	0	0	0	0	0	0	0	0	0	0	0	0	0	0	0	0	0	0	0	0	0	0	0	0	0	0	0.08	0.16	0.25	0.32	0.33	0.31	0.26	0.26	0.33	0.51	0.79	1.15	1.52	1.88	2.18	2.46
2		2,62	11,4	64,7	0	0	0	0	0	0	0	0	0	0	0	0	0	0	0	0	0	0	0	0	0	0	0	0	0	0	0	0	0	0.08	0.17	0.27	0.34	0.35	0.32	0.28	0.27	0.35	0.54	0.84	1.21	1.6	1.97	2.29	2.57
3		2,61	11,3	67,3	0	0	0	0	0	0	0	0	0	0	0	0	0	0	0	0	0	0	0	0	0	0	0	0	0	0	0	0	0	0.08	0.18	0.27	0.34	0.35	0.33	0.28	0.27	0.35	0.54	0.84	1.21	1.61	1.98	2.3	2.58
1	118.47	2,61	9,83	59,5	0	0	0	0	0	0	0	0	0	0	0	0	0	0	0	0	0	0	0	0	0	0	0	0	0	0	0	0	0	0	0.14	0.23	0.3	0.33	0.31	0.26	0.25	0.33	0.53	0.85	1.25	1.68	2.08	2.44	2.77
2		2,57	9,51	50,6	0	0	0	0	0	0	0	0	0	0	0	0	0	0	0	0	0	0	0	0	0	0	0	0	0	0	0	0	0	0	0.14	0.24	0.31	0.34	0.32	0.27	0.26	0.34	0.55	0.88	1.28	1.72	2.13	2.5	2.83
3		2,56	9,39	50,5	0	0	0	0	0	0	0	0	0	0	0	0	0	0	0	0	0	0	0	0	0	0	0	0	0	0	0	0	0	0	0.14	0.24	0.32	0.34	0.32	0.28	0.27	0.35	0.56	0.89	1.3	1.74	2.15	2.52	2.85
1	119.61	2,85	12,5	62,2	0	0	0	0	0	0	0	0	0	0	0	0	0	0	0	0	0	0	0	0	0	0	0	0	0	0	0	0	0	0	0.1	0.17	0.23	0.26	0.24	0.22	0.22	0.29	0.46	0.74	1.08	1.45	1.79	2.09	2.36
2		2,84	12,4	60,8	0	0	0	0	0	0	0	0	0	0	0	0	0	0	0	0	0	0	0	0	0	0	0	0	0	0	0	0	0	0	0.1	0.18	0.24	0.26	0.25	0.22	0.22	0.29	0.47	0.75	1.09	1.46	1.8	2.11	2.38
3		2,82	12,2	58,6	0	0	0	0	0	0	0	0	0	0	0	0	0	0	0	0	0	0	0	0	0	0	0	0	0	0	0	0	0	0	0.1	0.18	0.24	0.27	0.25	0.22	0.22	0.29	0.47	0.75	1.1	1.47	1.82	2.13	2.4
1	120.75	2,72	11,1	65,9	0	0	0	0	0	0	0	0	0	0	0	0	0	0	0	0	0	0	0	0	0	0	0	0	0	0	0	0	0	0	0.08	0.15	0.21	0.23	0.22	0.2	0.22	0.31	0.51	0.82	1.21	1.62	2.02	2.37	2.67
2		2,70	10,8	60,7	0	0	0	0	0	0	0	0	0	0	0	0	0	0	0	0	0	0	0	0	0	0	0	0	0	0	0	0	0	0	0.08	0.15	0.21	0.24	0.23	0.21	0.22	0.31	0.52	0.83	1.23	1.65	2.05	2.41	2.72
3		2,71	11,0	65,2	0	0	0	0	0	0	0	0	0	0	0	0	0	0	0	0	0	0	0	0	0	0	0	0	0	0	0	0	0	0	0.08	0.15	0.21	0.24	0.23	0.21	0.22	0.31	0.51	0.82	1.22	1.63	2.03	2.38	2.69
1	121.89	3,01	16,7	103	0	0	0	0	0	0	0	0	0	0	0	0	0	0	0	0	0	0	0	0	0	0	0	0	0	0	0	0	0	0	0.11	0.18	0.23	0.25	0.23	0.21	0.21	0.27	0.43	0.67	0.98	1.3	1.6	1.86	2.09
2		2,94	15,5	82,3	0	0	0	0	0	0	0	0	0	0	0	0	0	0	0	0	0	0	0	0	0	0	0	0	0	0	0	0	0	0	0.11	0.19	0.24	0.26	0.24	0.22	0.22	0.28	0.45	0.7	1.02	1.35	1.66	1.93	2.17
3		2,92	15,2	79,0	0	0	0	0	0	0	0	0	0	0	0	0	0	0	0	0	0	0	0	0	0	0	0	0	0	0	0	0	0	0	0.11	0.19	0.24	0.26	0.25	0.22	0.22	0.29	0.45	0.71	1.03	1.37	1.68	1.96	2.19
1	123.03	2,87	16,3	92,9	0	0	0	0	0	0	0	0	0	0	0	0	0	0	0	0	0	0	0	0	0	0	0	0	0	0	0	0	0	0.07	0.14	0.21	0.26	0.28	0.26	0.24	0.24	0.31	0.48	0.73	1.05	1.38	1.68	1.95	2.17
2		2,86	16,2	91,3	0	0	0	0	0	0	0	0	0	0	0	0	0	0	0	0	0	0	0	0	0	0	0	0	0	0	0	0	0	0.07	0.14	0.21	0.26	0.28	0.27	0.24	0.24	0.32	0.48	0.74	1.05	1.38	1.69	1.95	2.18
3		2,88	16,5	99,8	0	0	0	0	0	0	0	0	0	0	0	0	0	0	0	0	0	0	0	0	0	0	0	0	0	0	0	0	0	0.07	0.14	0.21	0.26	0.28	0.26	0.24	0.24	0.31	0.48	0.73	1.04	1.37	1.67	1.93	2.15
1	124.17	2,62	11,6	63,8	0	0	0	0	0	0	0	0	0	0	0	0	0	0	0	0	0	0	0	0	0	0	0	0	0	0	0	0	0	0.06	0.14	0.23	0.29	0.31	0.29	0.26	0.27	0.35	0.55	0.86	1.24	1.65	2.02	2.35	2.63
2		2,63	11,7	66,7	0	0	0	0	0	0	0	0	0	0	0	0	0	0	0	0	0	0	0	0	0	0	0	0	0	0	0	0	0	0.07	0.15	0.23	0.29	0.31	0.29	0.26	0.26	0.35	0.55	0.86	1.24	1.64	2.01	2.33	2.61
3		2,61	11,5	65,8	0	0	0	0	0	0	0	0	0	0	0	0	0	0	0	0	0	0	0	0	0	0	0	0	0	0	0	0	0	0.07	0.15	0.23	0.3	0.32	0.3	0.27	0.27	0.36	0.56	0.87	1.25	1.65	2.03	2.35	2.64
1	125.32	2,56	11,5	62,4	0	0	0	0	0	0	0	0	0	0	0	0	0	0	0	0	0	0	0	0	0	0	0	0	0	0	0	0	0	0.08	0.17	0.26	0.32	0.33	0.31	0.28	0.28	0.37	0.58	0.89	1.28	1.69	2.07	2.4	2.67
2		2,54	11,3	59,2	0	0	0	0	0	0	0	0	0	0	0	0	0	0	0	0	0	0	0	0	0	0	0	0	0	0	0	0	0	0.09	0.18	0.27	0.33	0.34	0.32	0.28	0.29	0.38	0.59	0.91	1.3	1.71	2.1	2.42	2.7
3		2,53	11,2	59,0	0	0	0	0	0	0	0	0	0	0	0	0	0	0	0	0	0	0	0	0	0	0	0	0	0	0	0	0	0	0.09	0.18	0.27	0.33	0.35	0.32	0.29	0.29	0.38	0.59	0.92	1.31	1.73	2.11	2.44	2.72
1	126.46	3,28	22,8	126	0	0	0	0	0	0	0	0	0	0	0	0	0	0	0	0	0	0	0	0	0	0	0	0	0	0	0	0	0	0	0.07	0.13	0.18	0.2	0.2	0.18	0.18	0.24	0.38	0.6	0.87	1.15	1.41	1.63	1.81
2		3,25	22,3	113	0	0	0	0	0	0	0	0	0	0	0	0	0	0	0	0	0	0	0	0	0	0	0	0	0	0	0	0	0	0	0.07	0.13	0.18	0.2	0.2	0.18	0.19	0.25	0.39	0.61	0.88	1.17	1.43	1.65	1.84
3		3,23	22,0	115	0	0	0	0	0	0	0	0	0	0	0	0	0	0	0	0	0	0	0	0	0	0	0	0	0	0	0	0	0	0	0.07	0.13	0.18	0.21	0.2	0.19	0.19	0.25	0.39	0.61	0.89	1.18	1.44	1.66	1.85
1	127.6	3,05	16,6	82,2	0	0	0	0	0	0	0	0	0	0	0	0	0	0	0	0	0	0	0	0	0	0	0	0	0	0	0	0	0	0	0.07	0.13	0.18	0.2	0.2	0.19	0.2	0.27	0.43	0.67	0.98	1.3	1.6	1.87	2.09
2		3,04	16,5	80,8	0	0	0	0	0	0	0	0	0	0	0	0	0	0	0	0	0	0	0	0	0	0	0	0	0	0	0	0	0	0	0.07	0.13	0.18	0.21	0.2	0.19	0.2	0.27	0.43	0.68	0.98	1.31	1.61	1.88	2.11
3		3,03	16,4	80,8	0	0	0	0	0	0	0	0	0	0	0	0	0	0	0	0	0	0	0	0	0	0	0	0	0	0	0	0	0	0	0.07	0.13	0.18	0.21	0.21	0.19	0.2	0.27	0.43	0.68	0.99	1.31	1.62	1.88	2.11
1	128.74	2,83	16,5	94,0	0	0	0	0	0	0	0	0	0	0	0	0	0	0	0	0	0	0	0	0	0	0	0	0	0	0	0	0	0	0.08	0.16	0.24	0.29	0.3	0.28	0.25	0.26	0.33	0.5	0.75	1.06	1.39	1.7	1.95	2.17
2		2,86	17,4	108	0	0	0	0	0	0	0	0	0	0	0	0	0	0	0	0	0	0	0	0	0	0	0	0	0	0	0	0	0	0.08	0.16	0.23	0.28	0.3	0.28	0.25	0.25	0.32	0.49	0.73	1.04	1.36	1.65	1.91	2.12
3		2,84	16,9	98,2	0	0	0	0	0	0	0	0	0	0	0	0	0	0	0	0	0	0	0	0	0	0	0	0	0	0	0	0	0	0.09	0.16	0.24	0.29	0.3	0.28	0.25	0.26	0.33	0.49	0.74	1.05	1.38	1.68	1.93	2.15
1	129.88	2,95	18,0	90,9	0	0	0	0	0	0	0	0	0	0	0	0	0	0	0	0	0	0	0	0	0	0	0	0	0	0	0	0	0	0	0.13	0.2	0.25	0.27	0.25	0.23	0.23	0.3	0.46	0.71	1.01	1.34	1.63	1.88	2.09
2		2,93	17,7	88,9	0	0	0	0	0	0	0	0	0	0	0	0	0	0	0	0	0	0	0	0	0	0	0	0	0	0	0	0	0	0	0.13	0.2	0.25	0.27	0.26	0.23	0.23	0.3	0.46	0.71	1.02	1.35	1.65	1.9	2.11
3		2,91	17,6	89,1	0	0	0	0	0	0	0	0	0	0	0	0	0	0	0	0	0	0	0	0	0	0	0	0	0	0	0	0	0	0.06	0.13	0.2	0.26	0.28	0.26	0.23	0.23	0.3	0.46	0.72	1.03	1.35	1.65	1.91	2.12
1	132.17	3,10	20,9	106	0	0	0	0	0	0	0	0	0	0	0	0	0	0	0	0	0	0	0	0	0	0	0	0	0	0	0	0	0	0.06	0.13	0.19	0.24	0.25	0.24	0.21	0.21	0.27	0.42	0.65	0.92	1.22	1.48	1.71	1.9
2		3,13	21,5	116	0	0	0	0	0	0	0	0	0	0	0	0	0	0	0	0	0	0	0	0	0	0	0	0	0	0	0	0	0	0.06	0.13	0.19	0.24	0.25	0.23	0.21	0.21	0.27	0.42	0.64	0.91	1.2	1.47	1.69	1.88
3		3,07	20,3	102	0	0	0	0	0	0	0	0	0	0	0	0	0	0	0	0	0	0	0	0	0	0	0	0	0	0	0	0	0	0.06	0.13	0.2	0.25	0.26	0.24	0.22	0.22	0.28	0.43	0.66	0.94	1.24	1.51	1.74	1.93
1	133.31	4,84	31,9	238	0	0	0	0	0	0	0	0	0	0	0	0	0	0	0	0	0	0	0	0	0	0	0	0	0	0	0	0	0	0	0	0	0.09	0.11	0.11	0.1	0.1	0.13	0.21	0.34	0.51	0.69	0.86	1	1.11
2		4,94	33,5	281	0	0	0	0	0	0	0	0	0	0	0	0	0	0	0	0	0	0	0	0	0	0	0	0	0	0	0	0	0	0	0	0	0.08	0.11	0.11	0.1	0.1	0.12	0.2	0.33	0.5	0.67	0.84	0.97	1.08
3		4,96	33,7	259	0	0	0	0	0	0	0	0	0	0	0	0	0	0	0	0	0	0	0	0	0	0	0	0	0	0	0	0	0	0	0	0	0.09	0.11	0.11	0.1	0.1	0.12	0.2	0.33	0.5	0.67	0.83	0.97	1.07
1	134.45	3,24	19,4	94,3	0	0	0	0	0	0	0	0	0	0	0	0	0	0	0	0	0	0	0	0	0	0	0	0	0	0	0	0	0	0	0.08	0.15	0.2	0.22	0.21	0.18	0.18	0.24	0.37	0.59	0.86	1.15	1.43	1.66	1.87
2		3,19	18,5	85,9	0	0	0	0	0	0	0	0	0	0	0	0	0	0	0	0	0	0	0	0	0	0	0	0	0	0	0	0	0	0	0.09	0.15	0.2	0.23	0.21	0.19	0.18	0.24	0.38	0.6	0.88	1.18	1.46	1.7	1.92
3		3,20	18,6	87,8	0	0	0	0	0	0	0	0	0	0	0	0	0	0	0	0	0	0	0	0	0	0	0	0	0	0	0	0	0	0	0.09	0.15	0.21	0.23	0.21	0.19	0.19	0.24	0.38	0.6	0.88	1.18	1.46	1.7	1.91
1	136.16	3,34	19,0	88,8	0	0	0	0	0	0	0	0	0	0	0	0	0	0	0	0	0	0	0	0	0	0	0	0	0	0	0	0	0	0	0	0.11	0.16	0.18	0.18	0.16	0.16	0.21	0.35	0.56	0.84	1.13	1.4	1.64	1.85
2		3,33	18,8	88,1	0	0	0	0	0	0	0	0	0	0	0	0	0	0	0	0	0	0	0	0	0	0	0	0	0	0	0	0	0	0	0	0.11	0.16	0.18	0.18	0.16	0.16	0.21	0.35	0.57	0.84	1.13	1.41	1.65	1.86
3		3,33	18,8	89,4	0	0	0	0	0	0	0	0	0	0	0	0	0	0	0	0	0	0	0	0	0	0	0	0	0	0	0	0	0	0	0	0.11	0.16	0.18	0.18	0.16	0.16	0.21	0.35	0.57	0.84	1.14	1.41	1.65	1.87
1	137.87	3,37	22,1	98,7	0	0	0	0	0	0	0	0	0	0	0	0	0	0	0	0	0	0	0	0	0	0	0	0	0	0	0	0	0	0	0.08	0.14	0.19	0.22	0.21	0.18	0.17	0.22	0.35	0.55	0.81	1.09	1.35	1.56	1.75
2		3,30	20,9	88,5	0	0	0	0	0	0	0	0	0	0	0	0	0	0	0	0	0	0	0	0	0	0	0	0	0	0	0	0	0	0	0.08	0.15	0.2	0.23	0.22	0.19	0.18	0.23	0.36	0.57	0.84	1.12	1.39	1.61	1.8
3		3,29	20,8	92,6	0	0	0	0	0	0	0	0	0	0	0	0	0	0	0	0	0	0	0	0	0	0	0	0	0	0	0	0	0	0	0.08	0.15	0.2	0.23	0.22	0.19	0.18	0.23	0.36	0.58	0.84	1.13	1.39	1.61	1.8
1	139.02	3,34	20,9	99,8	0	0	0	0	0	0	0	0	0	0	0	0	0	0	0	0	0	0	0	0	0	0	0	0	0	0	0	0	0	0	0.07	0.14	0.19	0.21	0.2	0.18	0.17	0.23	0.36	0.57	0.83	1.11	1.37	1.59	1.78
2		3,33	20,9	99,3	0	0	0	0	0	0	0	0	0	0	0	0	0	0	0	0	0	0	0	0	0	0	0	0	0	0	0	0	0	0	0.08	0.14	0.19	0.21	0.2	0.18	0.18	0.23	0.36	0.57	0.83	1.11	1.37	1.6	1.79
3		3,27	19,9	90,6	0	0	0	0	0	0	0	0	0	0	0	0	0	0	0	0	0	0	0	0	0	0	0	0	0	0	0	0	0	0	0.08	0.14	0.2	0.22	0.21	0.18	0.18	0.23	0.37	0.59	0.86	1.14	1.41	1.64	1.84
1	141.3	3,95	28,7	154	0	0	0	0	0	0	0	0	0	0	0	0	0	0	0	0	0	0	0	0	0	0	0	0	0	0	0	0	0	0	0	0.1	0.14	0.16	0.15	0.13	0.13	0.17	0.27	0.44	0.65	0.87	1.08	1.26	1.42
2		3,97	29,0	170	0	0	0	0	0	0	0	0	0	0	0	0	0	0	0	0	0	0	0	0	0	0	0	0	0	0	0	0	0	0	0	0.09	0.14	0.15	0.15	0.13	0.13	0.17	0.27	0.44	0.64	0.87	1.07	1.26	1.41
3		3,92	28,3	150	0	0	0	0	0	0	0	0	0	0	0	0	0	0	0	0	0	0	0	0	0	0	0	0	0	0	0	0	0	0	0	0.1	0.14	0.16	0.15	0.13	0.13	0.17	0.27	0.44	0.65	0.88	1.09	1.27	1.44
1	143.58	3,26	21,5	103	0	0	0	0	0	0	0	0	0	0	0	0	0	0	0	0	0	0	0	0	0	0	0	0	0	0	0	0	0	0	0.11	0.17	0.22	0.24	0.22	0.19	0.19	0.24	0.37	0.59	0.85	1.13	1.39	1.61	1.8
2		3,26	21,5	105	0	0	0	0	0	0	0	0	0	0	0	0	0	0	0	0	0	0	0	0	0	0	0	0	0	0	0	0	0	0	0.11	0.18	0.22	0.24	0.22	0.19	0.19	0.24	0.37	0.59	0.85	1.13	1.39	1.61	1.8
3		3,20	20,5	94,7	0	0	0	0	0	0	0	0	0	0	0	0	0	0	0	0	0	0	0	0	0	0	0	0	0	0	0	0	0	0	0.12	0.18	0.23	0.24	0.23	0.2	0.19	0.25	0.39	0.61	0.88	1.16	1.43	1.65	1.85
1	145.87	3,39	20,9	97,6	0	0	0	0	0	0	0	0	0	0	0	0	0	0	0	0	0	0	0	0	0	0	0	0	0	0	0	0	0	0	0.09	0.15	0.19	0.21	0.2	0.17	0.16	0.21	0.34	0.54	0.8	1.07	1.33	1.55	1.75
2		3,34	20,2	91,0	0	0	0	0	0	0	0	0	0	0	0	0	0	0	0	0	0	0	0	0	0	0	0	0	0	0	0	0	0	0	0.09	0.15	0.2	0.21	0.2	0.17	0.17	0.22	0.35	0.56	0.82	1.1	1.36	1.58	1.78
3		3,35	20,5	94,3	0	0	0	0	0	0	0	0	0	0	0	0	0	0	0	0	0	0	0	0	0	0	0	0	0	0	0	0	0	0	0.09	0.15	0.2	0.22	0.2	0.17	0.17	0.22	0.35	0.55	0.82	1.09	1.35	1.58	1.77
1	148.15	3,28	17,0	78,6	0	0	0	0	0	0	0	0	0	0	0	0	0	0	0	0	0	0	0	0	0	0	0	0	0	0	0	0	0	0	0	0.11	0.17	0.19	0.18	0.16	0.15	0.21	0.34	0.57	0.85	1.16	1.45	1.7	1.93
2		3,28	17,0	78,6	0	0	0	0	0	0	0	0	0	0	0	0	0	0	0	0	0	0	0	0	0	0	0	0	0	0	0	0	0	0	0	0.12	0.17	0.19	0.18	0.16	0.15	0.21	0.35	0.57	0.86	1.16	1.45	1.71	1.93
3		3,25	16,8	78,5	0	0	0	0	0	0	0	0	0	0	0	0	0	0	0	0	0	0	0	0	0	0	0	0	0	0	0	0	0	0	0.06	0.12	0.17	0.19	0.18	0.16	0.15	0.21	0.35	0.58	0.86	1.17	1.46	1.72	1.95
1	150.43	3,36	17,4	144	0	0	0	0	0	0	0	0	0	0	0	0	0	0	0	0	0	0	0	0	0	0	0	0	0	0	0	0	0	0	0	0.12	0.17	0.19	0.17	0.14	0.13	0.18	0.32	0.54	0.81	1.11	1.4	1.65	1.88
2		3,40	18,2	187	0	0	0	0	0	0	0	0	0	0	0	0	0	0	0	0	0	0	0	0	0	0	0	0	0	0	0	0	0	0	0	0.11	0.16	0.18	0.17	0.14	0.13	0.18	0.31	0.52	0.8	1.09	1.37	1.61	1.84
3		3,39	18,2	169	0	0	0	0	0	0	0	0	0	0	0	0	0	0	0	0	0	0	0	0	0	0	0	0	0	0	0	0	0	0	0.06	0.12	0.16	0.18	0.17	0.14	0.13	0.18	0.31	0.52	0.8	1.09	1.37	1.62	1.84
1	152.72	3,50	17,0	80,6	0	0	0	0	0	0	0	0	0	0	0	0	0	0	0	0	0	0	0	0	0	0	0	0	0	0	0	0	0	0	0	0.07	0.12	0.14	0.14	0.11	0.1	0.15	0.28	0.49	0.76	1.06	1.34	1.59	1.82
2		3,52	17,4	85,1	0	0	0	0	0	0	0	0	0	0	0	0	0	0	0	0	0	0	0	0	0	0	0	0	0	0	0	0	0	0	0	0.07	0.12	0.14	0.14	0.11	0.11	0.15	0.28	0.48	0.75	1.05	1.32	1.57	1.8
3		3,52	17,3	87,3	0	0	0	0	0	0	0	0	0	0	0	0	0	0	0	0	0	0	0	0	0	0	0	0	0	0	0	0	0	0	0	0.07	0.12	0.14	0.14	0.11	0.11	0.15	0.28	0.49	0.76	1.05	1.33	1.58	1.81
1	155	3,48	18,9	83,1	0	0	0	0	0	0	0	0	0	0	0	0	0	0	0	0	0	0	0	0	0	0	0	0	0	0	0	0	0	0	0	0.11	0.15	0.17	0.16	0.14	0.13	0.18	0.3	0.51	0.78	1.06	1.33	1.56	1.77
2		3,44	18,3	78,8	0	0	0	0	0	0	0	0	0	0	0	0	0	0	0	0	0	0	0	0	0	0	0	0	0	0	0	0	0	0	0	0.11	0.16	0.18	0.17	0.14	0.13	0.18	0.31	0.52	0.79	1.08	1.35	1.59	1.8
3		3,43	18,3	79,7	0	0	0	0	0	0	0	0	0	0	0	0	0	0	0	0	0	0	0	0	0	0	0	0	0	0	0	0	0	0	0	0.11	0.16	0.18	0.17	0.14	0.13	0.18	0.31	0.52	0.79	1.08	1.35	1.59	1.81
1	158.42	3,67	19,5	95,0	0	0	0	0	0	0	0	0	0	0	0	0	0	0	0	0	0	0	0	0	0	0	0	0	0	0	0	0	0	0	0	0.09	0.13	0.15	0.14	0.12	0.12	0.16	0.28	0.47	0.71	0.97	1.22	1.44	1.63
2		3,66	19,3	94,2	0	0	0	0	0	0	0	0	0	0	0	0	0	0	0	0	0	0	0	0	0	0	0	0	0	0	0	0	0	0	0	0.09	0.13	0.15	0.14	0.12	0.11	0.16	0.28	0.47	0.72	0.98	1.23	1.45	1.65
3		3,66	19,4	97,4	0	0	0	0	0	0	0	0	0	0	0	0	0	0	0	0	0	0	0	0	0	0	0	0	0	0	0	0	0	0	0	0.09	0.13	0.15	0.14	0.12	0.12	0.16	0.28	0.47	0.72	0.98	1.23	1.44	1.64
1	160.71	3,13	15,6	72,1	0	0	0	0	0	0	0	0	0	0	0	0	0	0	0	0	0	0	0	0	0	0	0	0	0	0	0	0	0	0	0.1	0.16	0.21	0.23	0.21	0.18	0.17	0.23	0.38	0.61	0.91	1.23	1.52	1.78	2.01
2		3,10	15,1	67,6	0	0	0	0	0	0	0	0	0	0	0	0	0	0	0	0	0	0	0	0	0	0	0	0	0	0	0	0	0	0	0.1	0.17	0.22	0.24	0.22	0.18	0.17	0.23	0.38	0.63	0.93	1.25	1.55	1.82	2.05
3		3,09	15,0	67,7	0	0	0	0	0	0	0	0	0	0	0	0	0	0	0	0	0	0	0	0	0	0	0	0	0	0	0	0	0	0	0.1	0.17	0.22	0.24	0.22	0.18	0.17	0.23	0.39	0.63	0.93	1.26	1.56	1.82	2.06
1	162.42	3,87	22,4	120	0	0	0	0	0	0	0	0	0	0	0	0	0	0	0	0	0	0	0	0	0	0	0	0	0	0	0	0	0	0	0	0	0.09	0.11	0.11	0.1	0.09	0.14	0.25	0.43	0.66	0.92	1.15	1.36	1.55
2		3,81	21,4	114	0	0	0	0	0	0	0	0	0	0	0	0	0	0	0	0	0	0	0	0	0	0	0	0	0	0	0	0	0	0	0	0	0.09	0.12	0.11	0.1	0.1	0.14	0.25	0.44	0.68	0.94	1.18	1.39	1.58
3		3,80	21,3	116	0	0	0	0	0	0	0	0	0	0	0	0	0	0	0	0	0	0	0	0	0	0	0	0	0	0	0	0	0	0	0	0	0.09	0.12	0.11	0.1	0.1	0.14	0.26	0.44	0.68	0.94	1.19	1.4	1.59
1	163.56	3,41	16,5	70,7	0	0	0	0	0	0	0	0	0	0	0	0	0	0	0	0	0	0	0	0	0	0	0	0	0	0	0	0	0	0	0	0.1	0.15	0.16	0.15	0.13	0.12	0.18	0.31	0.53	0.8	1.1	1.38	1.63	1.85
2		3,41	16,5	71,3	0	0	0	0	0	0	0	0	0	0	0	0	0	0	0	0	0	0	0	0	0	0	0	0	0	0	0	0	0	0	0	0.1	0.15	0.16	0.15	0.13	0.12	0.18	0.31	0.53	0.8	1.09	1.37	1.62	1.85
3		3,40	16,4	70,0	0	0	0	0	0	0	0	0	0	0	0	0	0	0	0	0	0	0	0	0	0	0	0	0	0	0	0	0	0	0	0	0.1	0.15	0.17	0.16	0.13	0.12	0.18	0.31	0.53	0.81	1.1	1.38	1.63	1.86
1	165	2,75	12,7	70,3	0	0	0	0	0	0	0	0	0	0	0	0	0	0	0	0	0	0	0	0	0	0	0	0	0	0	0	0	0.06	0.14	0.23	0.3	0.33	0.33	0.28	0.24	0.24	0.31	0.49	0.75	1.08	1.43	1.76	2.06	2.33
2		2,72	12,4	69,3	0	0	0	0	0	0	0	0	0	0	0	0	0	0	0	0	0	0	0	0	0	0	0	0	0	0	0	0	0.07	0.15	0.23	0.31	0.34	0.33	0.29	0.24	0.24	0.32	0.49	0.76	1.1	1.45	1.79	2.09	2.37
3		2,72	12,4	73,4	0	0	0	0	0	0	0	0	0	0	0	0	0	0	0	0	0	0	0	0	0	0	0	0	0	0	0	0	0.07	0.15	0.24	0.31	0.34	0.33	0.29	0.24	0.24	0.31	0.49	0.76	1.1	1.45	1.79	2.09	2.37
1	166.41	3,32	15,7	73,5	0	0	0	0	0	0	0	0	0	0	0	0	0	0	0	0	0	0	0	0	0	0	0	0	0	0	0	0	0	0	0	0.1	0.15	0.17	0.16	0.13	0.12	0.18	0.32	0.55	0.84	1.15	1.45	1.71	1.94
2		3,27	15,0	66,6	0	0	0	0	0	0	0	0	0	0	0	0	0	0	0	0	0	0	0	0	0	0	0	0	0	0	0	0	0	0	0	0.11	0.16	0.18	0.16	0.14	0.13	0.18	0.33	0.56	0.86	1.18	1.49	1.75	2
3		3,25	14,9	66,4	0	0	0	0	0	0	0	0	0	0	0	0	0	0	0	0	0	0	0	0	0	0	0	0	0	0	0	0	0	0	0	0.11	0.16	0.18	0.17	0.14	0.13	0.18	0.33	0.57	0.87	1.19	1.5	1.77	2.01
1	168.7	3,20	14,8	73,0	0	0	0	0	0	0	0	0	0	0	0	0	0	0	0	0	0	0	0	0	0	0	0	0	0	0	0	0	0	0	0.06	0.12	0.17	0.19	0.17	0.14	0.13	0.19	0.34	0.58	0.88	1.21	1.52	1.79	2.04
2		3,15	14,1	64,6	0	0	0	0	0	0	0	0	0	0	0	0	0	0	0	0	0	0	0	0	0	0	0	0	0	0	0	0	0	0	0.07	0.13	0.18	0.2	0.18	0.15	0.14	0.2	0.35	0.6	0.91	1.24	1.56	1.84	2.1
3		3,14	14,0	64,3	0	0	0	0	0	0	0	0	0	0	0	0	0	0	0	0	0	0	0	0	0	0	0	0	0	0	0	0	0	0	0.07	0.13	0.18	0.2	0.18	0.15	0.14	0.2	0.35	0.6	0.92	1.25	1.57	1.86	2.11
1	170.98	3,26	14,4	64,6	0	0	0	0	0	0	0	0	0	0	0	0	0	0	0	0	0	0	0	0	0	0	0	0	0	0	0	0	0	0	0	0.1	0.15	0.17	0.16	0.13	0.12	0.18	0.33	0.56	0.87	1.19	1.5	1.78	2.03
2		3,22	14,0	59,7	0	0	0	0	0	0	0	0	0	0	0	0	0	0	0	0	0	0	0	0	0	0	0	0	0	0	0	0	0	0	0	0.1	0.15	0.17	0.16	0.13	0.13	0.18	0.33	0.58	0.88	1.22	1.53	1.81	2.07
3		3,20	13,7	57,0	0	0	0	0	0	0	0	0	0	0	0	0	0	0	0	0	0	0	0	0	0	0	0	0	0	0	0	0	0	0	0	0.1	0.15	0.18	0.16	0.13	0.13	0.19	0.34	0.58	0.9	1.23	1.55	1.84	2.1
1	172.69	3,48	16,6	76,7	0	0	0	0	0	0	0	0	0	0	0	0	0	0	0	0	0	0	0	0	0	0	0	0	0	0	0	0	0	0	0	0.07	0.11	0.14	0.13	0.11	0.1	0.15	0.29	0.5	0.78	1.08	1.36	1.61	1.84
2		3,44	16,2	72,8	0	0	0	0	0	0	0	0	0	0	0	0	0	0	0	0	0	0	0	0	0	0	0	0	0	0	0	0	0	0	0	0.07	0.12	0.14	0.13	0.11	0.1	0.16	0.29	0.51	0.8	1.1	1.39	1.64	1.87
3		3,43	16,1	73,7	0	0	0	0	0	0	0	0	0	0	0	0	0	0	0	0	0	0	0	0	0	0	0	0	0	0	0	0	0	0	0	0.07	0.12	0.14	0.13	0.11	0.1	0.16	0.29	0.52	0.8	1.11	1.39	1.65	1.87
1	173.84	3,75	19,5	87,1	0	0	0	0	0	0	0	0	0	0	0	0	0	0	0	0	0	0	0	0	0	0	0	0	0	0	0	0	0	0	0	0.06	0.1	0.12	0.12	0.1	0.1	0.14	0.26	0.45	0.69	0.95	1.2	1.41	1.61
2		3,71	19,1	82,1	0	0	0	0	0	0	0	0	0	0	0	0	0	0	0	0	0	0	0	0	0	0	0	0	0	0	0	0	0	0	0	0.07	0.11	0.12	0.12	0.1	0.1	0.14	0.26	0.45	0.7	0.96	1.21	1.44	1.64
3		3,71	19,0	82,3	0	0	0	0	0	0	0	0	0	0	0	0	0	0	0	0	0	0	0	0	0	0	0	0	0	0	0	0	0	0	0	0.07	0.11	0.13	0.12	0.1	0.1	0.14	0.26	0.46	0.7	0.97	1.22	1.44	1.64
1	175.55	3,59	17,1	74,7	0	0	0	0	0	0	0	0	0	0	0	0	0	0	0	0	0	0	0	0	0	0	0	0	0	0	0	0	0	0	0	0	0.1	0.12	0.11	0.09	0.09	0.14	0.27	0.48	0.75	1.04	1.32	1.56	1.77
2		3,56	16,8	72,5	0	0	0	0	0	0	0	0	0	0	0	0	0	0	0	0	0	0	0	0	0	0	0	0	0	0	0	0	0	0	0	0	0.1	0.12	0.11	0.09	0.09	0.14	0.27	0.49	0.76	1.05	1.33	1.57	1.79
3		3,55	16,9	73,9	0	0	0	0	0	0	0	0	0	0	0	0	0	0	0	0	0	0	0	0	0	0	0	0	0	0	0	0	0	0	0	0.06	0.1	0.12	0.12	0.1	0.09	0.14	0.27	0.49	0.76	1.05	1.33	1.57	1.79
1	177.26	4,06	22,5	97,9	0	0	0	0	0	0	0	0	0	0	0	0	0	0	0	0	0	0	0	0	0	0	0	0	0	0	0	0	0	0	0	0	0.07	0.09	0.09	0.08	0.08	0.12	0.22	0.39	0.61	0.85	1.08	1.28	1.46
2		4,05	22,4	99,2	0	0	0	0	0	0	0	0	0	0	0	0	0	0	0	0	0	0	0	0	0	0	0	0	0	0	0	0	0	0	0	0	0.07	0.09	0.09	0.08	0.07	0.12	0.22	0.39	0.62	0.85	1.08	1.28	1.46
3		4,02	22,0	95,4	0	0	0	0	0	0	0	0	0	0	0	0	0	0	0	0	0	0	0	0	0	0	0	0	0	0	0	0	0	0	0	0	0.07	0.09	0.09	0.08	0.08	0.12	0.23	0.4	0.62	0.87	1.09	1.3	1.48
1	179.54	4,86	29,2	228	0	0	0	0	0	0	0	0	0	0	0	0	0	0	0	0	0	0	0	0	0	0	0	0	0	0	0	0	0	0	0	0	0	0	0	0	0	0.08	0.16	0.29	0.47	0.66	0.84	1	1.15
2		4,88	29,5	242	0	0	0	0	0	0	0	0	0	0	0	0	0	0	0	0	0	0	0	0	0	0	0	0	0	0	0	0	0	0	0	0	0	0	0	0	0	0.08	0.16	0.29	0.47	0.66	0.84	1	1.14
3		4,92	30,0	235	0	0	0	0	0	0	0	0	0	0	0	0	0	0	0	0	0	0	0	0	0	0	0	0	0	0	0	0	0	0	0	0	0	0	0	0	0	0.07	0.16	0.29	0.46	0.65	0.83	0.99	1.13
1	181.26	3,78	18,5	78,6	0	0	0	0	0	0	0	0	0	0	0	0	0	0	0	0	0	0	0	0	0	0	0	0	0	0	0	0	0	0	0	0	0.09	0.11	0.1	0.09	0.08	0.13	0.24	0.44	0.68	0.95	1.2	1.42	1.63
2		3,78	18,7	81,8	0	0	0	0	0	0	0	0	0	0	0	0	0	0	0	0	0	0	0	0	0	0	0	0	0	0	0	0	0	0	0	0	0.08	0.11	0.1	0.09	0.08	0.13	0.24	0.43	0.68	0.94	1.2	1.42	1.63
3		3,79	18,7	82,5	0	0	0	0	0	0	0	0	0	0	0	0	0	0	0	0	0	0	0	0	0	0	0	0	0	0	0	0	0	0	0	0	0.09	0.11	0.1	0.09	0.08	0.13	0.24	0.43	0.68	0.94	1.19	1.42	1.62
1	183.54	3,70	18,7	80,9	0	0	0	0	0	0	0	0	0	0	0	0	0	0	0	0	0	0	0	0	0	0	0	0	0	0	0	0	0	0	0	0	0.09	0.11	0.11	0.09	0.08	0.13	0.25	0.45	0.71	0.98	1.25	1.48	1.69
2		3,69	18,6	79,7	0	0	0	0	0	0	0	0	0	0	0	0	0	0	0	0	0	0	0	0	0	0	0	0	0	0	0	0	0	0	0	0	0.09	0.11	0.11	0.09	0.09	0.13	0.25	0.45	0.71	0.99	1.25	1.48	1.69
3		3,68	18,5	80,2	0	0	0	0	0	0	0	0	0	0	0	0	0	0	0	0	0	0	0	0	0	0	0	0	0	0	0	0	0	0	0	0	0.09	0.11	0.11	0.09	0.09	0.13	0.25	0.46	0.71	0.99	1.26	1.49	1.7
1	185.25	4,72	32,6	214	0	0	0	0	0	0	0	0	0	0	0	0	0	0	0	0	0	0	0	0	0	0	0	0	0	0	0	0	0	0	0	0	0.07	0.08	0.08	0.07	0.06	0.1	0.18	0.32	0.49	0.68	0.86	1.02	1.16
2		4,66	31,5	179	0	0	0	0	0	0	0	0	0	0	0	0	0	0	0	0	0	0	0	0	0	0	0	0	0	0	0	0	0	0	0	0	0.07	0.08	0.08	0.07	0.07	0.1	0.18	0.32	0.5	0.69	0.88	1.04	1.18
3		4,72	32,6	207	0	0	0	0	0	0	0	0	0	0	0	0	0	0	0	0	0	0	0	0	0	0	0	0	0	0	0	0	0	0	0	0	0.07	0.08	0.08	0.07	0.06	0.1	0.18	0.32	0.49	0.68	0.86	1.02	1.16
1	186.96	4,21	26,6	116	0	0	0	0	0	0	0	0	0	0	0	0	0	0	0	0	0	0	0	0	0	0	0	0	0	0	0	0	0	0	0	0	0.09	0.11	0.1	0.08	0.08	0.12	0.22	0.38	0.58	0.8	1.01	1.2	1.36
2		4,15	25,6	106	0	0	0	0	0	0	0	0	0	0	0	0	0	0	0	0	0	0	0	0	0	0	0	0	0	0	0	0	0	0	0	0	0.09	0.11	0.1	0.09	0.08	0.12	0.22	0.39	0.6	0.82	1.03	1.22	1.39
3		4,14	25,5	107	0	0	0	0	0	0	0	0	0	0	0	0	0	0	0	0	0	0	0	0	0	0	0	0	0	0	0	0	0	0	0	0	0.09	0.11	0.1	0.09	0.08	0.12	0.22	0.39	0.6	0.82	1.04	1.23	1.4
1	189.25	4,18	29,0	176	0	0	0	0	0	0	0	0	0	0	0	0	0	0	0	0	0	0	0	0	0	0	0	0	0	0	0	0	0	0	0	0.07	0.1	0.12	0.11	0.09	0.09	0.13	0.23	0.39	0.59	0.81	1.01	1.19	1.35
2		4,17	28,7	171	0	0	0	0	0	0	0	0	0	0	0	0	0	0	0	0	0	0	0	0	0	0	0	0	0	0	0	0	0	0	0	0.07	0.1	0.12	0.11	0.09	0.09	0.13	0.23	0.39	0.59	0.81	1.02	1.2	1.36
3		4,11	27,7	146	0	0	0	0	0	0	0	0	0	0	0	0	0	0	0	0	0	0	0	0	0	0	0	0	0	0	0	0	0	0	0	0.07	0.11	0.12	0.11	0.1	0.09	0.13	0.23	0.4	0.61	0.83	1.04	1.22	1.38
1	189.82	5,32	44,3	400	0	0	0	0	0	0	0	0	0	0	0	0	0	0	0	0	0	0	0	0	0	0	0	0	0	0	0	0	0	0	0	0	0	0	0	0	0	0.08	0.16	0.28	0.44	0.61	0.77	0.91	1.03
2		5,36	45,2	426	0	0	0	0	0	0	0	0	0	0	0	0	0	0	0	0	0	0	0	0	0	0	0	0	0	0	0	0	0	0	0	0	0	0	0	0	0	0.08	0.16	0.28	0.44	0.61	0.76	0.9	1.02
3		5,28	43,5	413	0	0	0	0	0	0	0	0	0	0	0	0	0	0	0	0	0	0	0	0	0	0	0	0	0	0	0	0	0	0	0	0	0	0	0	0	0	0.09	0.16	0.29	0.45	0.62	0.78	0.91	1.04
1	190.39	5,56	50,8	506	0	0	0	0	0	0	0	0	0	0	0	0	0	0	0	0	0	0	0	0	0	0	0	0	0	0	0	0	0	0	0	0	0	0	0	0	0	0.08	0.16	0.27	0.42	0.58	0.73	0.86	0.97
2		5,14	44,3	408	0	0	0	0	0	0	0	0	0	0	0	0	0	0	0	0	0	0	0	0	0	0	0	0	0	0	0	0	0	0	0	0	0.07	0.09	0.08	0.07	0.06	0.09	0.17	0.29	0.45	0.62	0.78	0.91	1.04
3		5,04	42,4	367	0	0	0	0	0	0	0	0	0	0	0	0	0	0	0	0	0	0	0	0	0	0	0	0	0	0	0	0	0	0	0	0	0.08	0.09	0.08	0.07	0.07	0.09	0.17	0.3	0.46	0.63	0.79	0.94	1.06
1	191.3	5,40	62,4	704	0	0	0	0	0	0	0	0	0	0	0	0	0	0	0	0	0	0	0	0	0	0	0	0	0	0	0	0	0	0	0	0.07	0.09	0.1	0.09	0.07	0.07	0.09	0.17	0.28	0.43	0.58	0.72	0.85	0.96
2		5,57	68,7	741	0	0	0	0	0	0	0	0	0	0	0	0	0	0	0	0	0	0	0	0	0	0	0	0	0	0	0	0	0	0	0	0.06	0.09	0.1	0.09	0.07	0.07	0.09	0.16	0.27	0.41	0.56	0.7	0.82	0.93
3		5,30	59,5	680	0	0	0	0	0	0	0	0	0	0	0	0	0	0	0	0	0	0	0	0	0	0	0	0	0	0	0	0	0	0	0	0.07	0.09	0.1	0.09	0.08	0.07	0.1	0.17	0.29	0.44	0.6	0.74	0.87	0.98
1	191.5	2,63	12,2	100	0	0	0	0	0	0	0	0	0	0	0	0	0	0	0	0	0	0	0	0	0	0	0	0	0	0	0	0	0.13	0.23	0.32	0.39	0.41	0.38	0.31	0.25	0.24	0.31	0.5	0.78	1.11	1.47	1.8	2.1	2.37
2		2,68	15,2	121	0	0	0	0	0	0	0	0	0	0	0	0	0	0	0	0	0	0	0	0	0	0	0	0	0	0	0	0.07	0.15	0.24	0.32	0.38	0.39	0.36	0.31	0.26	0.26	0.34	0.51	0.76	1.06	1.38	1.68	1.95	2.18
3		2,68	15,5	123	0	0	0	0	0	0	0	0	0	0	0	0	0	0	0	0	0	0	0	0	0	0	0	0	0	0	0	0.07	0.15	0.24	0.32	0.38	0.39	0.36	0.31	0.27	0.26	0.34	0.51	0.76	1.06	1.37	1.67	1.93	2.17
1	192	2,88	16,4	91,4	0	0	0	0	0	0	0	0	0	0	0	0	0	0	0	0	0	0	0	0	0	0	0	0	0	0	0	0	0.08	0.15	0.23	0.3	0.33	0.31	0.27	0.23	0.22	0.29	0.45	0.69	0.98	1.29	1.58	1.84	2.07
2		2,88	16,5	92,4	0	0	0	0	0	0	0	0	0	0	0	0	0	0	0	0	0	0	0	0	0	0	0	0	0	0	0	0	0.08	0.16	0.24	0.3	0.33	0.31	0.27	0.23	0.22	0.29	0.45	0.69	0.98	1.29	1.58	1.84	2.07
3		2,87	16,5	92,7	0	0	0	0	0	0	0	0	0	0	0	0	0	0	0	0	0	0	0	0	0	0	0	0	0	0	0	0	0.08	0.16	0.24	0.3	0.33	0.31	0.27	0.23	0.23	0.3	0.45	0.69	0.99	1.29	1.58	1.84	2.07
1	192.5	3,37	21,3	122	0	0	0	0	0	0	0	0	0	0	0	0	0	0	0	0	0	0	0	0	0	0	0	0	0	0	0	0	0	0.07	0.14	0.19	0.22	0.22	0.2	0.16	0.16	0.21	0.34	0.54	0.79	1.06	1.31	1.53	1.73
2		3,34	21,0	117	0	0	0	0	0	0	0	0	0	0	0	0	0	0	0	0	0	0	0	0	0	0	0	0	0	0	0	0	0	0.08	0.14	0.2	0.23	0.23	0.2	0.17	0.16	0.21	0.35	0.55	0.8	1.07	1.32	1.54	1.75
3		3,35	21,3	120	0	0	0	0	0	0	0	0	0	0	0	0	0	0	0	0	0	0	0	0	0	0	0	0	0	0	0	0	0	0.08	0.14	0.2	0.23	0.23	0.2	0.17	0.16	0.21	0.34	0.55	0.8	1.06	1.32	1.54	1.74
1	193	3,75	25,6	140	0	0	0	0	0	0	0	0	0	0	0	0	0	0	0	0	0	0	0	0	0	0	0	0	0	0	0	0	0	0	0.08	0.13	0.16	0.16	0.15	0.12	0.12	0.17	0.28	0.46	0.69	0.92	1.15	1.35	1.53
2		3,74	25,4	141	0	0	0	0	0	0	0	0	0	0	0	0	0	0	0	0	0	0	0	0	0	0	0	0	0	0	0	0	0	0	0.08	0.13	0.16	0.16	0.15	0.12	0.12	0.17	0.29	0.47	0.69	0.93	1.16	1.36	1.54
3		3,72	25,2	140	0	0	0	0	0	0	0	0	0	0	0	0	0	0	0	0	0	0	0	0	0	0	0	0	0	0	0	0	0	0	0.08	0.13	0.16	0.17	0.15	0.12	0.12	0.17	0.29	0.47	0.7	0.94	1.17	1.37	1.55
1	193.5	3,90	25,9	148	0	0	0	0	0	0	0	0	0	0	0	0	0	0	0	0	0	0	0	0	0	0	0	0	0	0	0	0	0	0	0.06	0.11	0.14	0.15	0.14	0.12	0.11	0.15	0.26	0.43	0.64	0.87	1.09	1.28	1.46
2		3,95	26,9	163	0	0	0	0	0	0	0	0	0	0	0	0	0	0	0	0	0	0	0	0	0	0	0	0	0	0	0	0	0	0	0.06	0.11	0.14	0.15	0.14	0.12	0.11	0.15	0.26	0.42	0.63	0.86	1.07	1.26	1.43
3		3,91	26,3	152	0	0	0	0	0	0	0	0	0	0	0	0	0	0	0	0	0	0	0	0	0	0	0	0	0	0	0	0	0	0	0.07	0.11	0.15	0.16	0.14	0.12	0.11	0.15	0.26	0.43	0.64	0.87	1.09	1.28	1.45
1	194	3,92	26,0	135	0	0	0	0	0	0	0	0	0	0	0	0	0	0	0	0	0	0	0	0	0	0	0	0	0	0	0	0	0	0	0	0.1	0.14	0.15	0.13	0.11	0.11	0.15	0.26	0.43	0.65	0.88	1.09	1.29	1.46
2		3,97	27,1	143	0	0	0	0	0	0	0	0	0	0	0	0	0	0	0	0	0	0	0	0	0	0	0	0	0	0	0	0	0	0	0	0.1	0.13	0.15	0.13	0.11	0.11	0.15	0.26	0.42	0.63	0.86	1.07	1.26	1.43
3		4,00	27,8	155	0	0	0	0	0	0	0	0	0	0	0	0	0	0	0	0	0	0	0	0	0	0	0	0	0	0	0	0	0	0	0	0.1	0.13	0.14	0.13	0.11	0.11	0.15	0.25	0.42	0.63	0.85	1.06	1.25	1.42
1	194.5	4,00	27,5	164	0	0	0	0	0	0	0	0	0	0	0	0	0	0	0	0	0	0	0	0	0	0	0	0	0	0	0	0	0	0	0	0.09	0.13	0.14	0.13	0.1	0.1	0.14	0.25	0.42	0.63	0.85	1.07	1.26	1.43
2		4,01	27,7	155	0	0	0	0	0	0	0	0	0	0	0	0	0	0	0	0	0	0	0	0	0	0	0	0	0	0	0	0	0	0	0	0.09	0.13	0.14	0.13	0.1	0.1	0.14	0.25	0.42	0.63	0.85	1.07	1.25	1.43
3		4,00	27,7	156	0	0	0	0	0	0	0	0	0	0	0	0	0	0	0	0	0	0	0	0	0	0	0	0	0	0	0	0	0	0	0	0.09	0.13	0.14	0.13	0.11	0.1	0.14	0.25	0.42	0.63	0.85	1.07	1.26	1.43
1	195	3,71	25,1	164	0	0	0	0	0	0	0	0	0	0	0	0	0	0	0	0	0	0	0	0	0	0	0	0	0	0	0	0	0	0	0.09	0.14	0.17	0.18	0.16	0.13	0.13	0.17	0.29	0.47	0.69	0.93	1.16	1.36	1.55
2		3,76	26,3	164	0	0	0	0	0	0	0	0	0	0	0	0	0	0	0	0	0	0	0	0	0	0	0	0	0	0	0	0	0	0	0.08	0.13	0.17	0.17	0.15	0.13	0.12	0.17	0.28	0.46	0.68	0.91	1.14	1.33	1.51
3		3,73	25,6	154	0	0	0	0	0	0	0	0	0	0	0	0	0	0	0	0	0	0	0	0	0	0	0	0	0	0	0	0	0	0	0.09	0.14	0.17	0.18	0.16	0.13	0.13	0.17	0.28	0.46	0.69	0.93	1.15	1.35	1.53
1	196.1	4,83	32,2	203	0	0	0	0	0	0	0	0	0	0	0	0	0	0	0	0	0	0	0	0	0	0	0	0	0	0	0	0	0	0	0	0	0	0	0	0	0	0.09	0.18	0.31	0.49	0.68	0.86	1.02	1.16
2		4,81	31,9	190	0	0	0	0	0	0	0	0	0	0	0	0	0	0	0	0	0	0	0	0	0	0	0	0	0	0	0	0	0	0	0	0	0	0	0	0	0	0.09	0.18	0.32	0.49	0.69	0.87	1.03	1.17
3		4,65	30,2	150	0	0	0	0	0	0	0	0	0	0	0	0	0	0	0	0	0	0	0	0	0	0	0	0	0	0	0	0	0	0	0	0	0	0.07	0.07	0.06	0.06	0.09	0.18	0.32	0.51	0.7	0.89	1.05	1.2
1	197	3,79	20,4	177	0	0	0	0	0	0	0	0	0	0	0	0	0	0	0	0	0	0	0	0	0	0	0	0	0	0	0	0	0	0	0	0	0.08	0.1	0.09	0.07	0.07	0.12	0.24	0.43	0.68	0.94	1.2	1.42	1.64
2		3,82	21,2	192	0	0	0	0	0	0	0	0	0	0	0	0	0	0	0	0	0	0	0	0	0	0	0	0	0	0	0	0	0	0	0	0	0.08	0.1	0.09	0.07	0.07	0.12	0.24	0.43	0.67	0.93	1.18	1.4	1.61
3		3,82	21,3	212	0	0	0	0	0	0	0	0	0	0	0	0	0	0	0	0	0	0	0	0	0	0	0	0	0	0	0	0	0	0	0	0	0.09	0.1	0.09	0.07	0.07	0.12	0.24	0.43	0.67	0.93	1.18	1.4	1.61
1	198.38	3,66	20,0	86,8	0	0	0	0	0	0	0	0	0	0	0	0	0	0	0	0	0	0	0	0	0	0	0	0	0	0	0	0	0	0	0	0.09	0.13	0.14	0.13	0.11	0.11	0.16	0.28	0.47	0.72	0.98	1.23	1.45	1.66
2		3,63	19,6	82,9	0	0	0	0	0	0	0	0	0	0	0	0	0	0	0	0	0	0	0	0	0	0	0	0	0	0	0	0	0	0	0	0.09	0.13	0.15	0.14	0.11	0.11	0.16	0.28	0.48	0.73	0.99	1.25	1.47	1.68
3		3,62	19,5	82,3	0	0	0	0	0	0	0	0	0	0	0	0	0	0	0	0	0	0	0	0	0	0	0	0	0	0	0	0	0	0	0	0.09	0.13	0.15	0.14	0.12	0.11	0.16	0.28	0.48	0.73	1	1.25	1.48	1.68
1	200.66	3,78	20,4	88,4	0	0	0	0	0	0	0	0	0	0	0	0	0	0	0	0	0	0	0	0	0	0	0	0	0	0	0	0	0	0	0	0	0.09	0.11	0.11	0.09	0.09	0.13	0.25	0.44	0.68	0.94	1.19	1.41	1.62
2		3,78	20,3	89,6	0	0	0	0	0	0	0	0	0	0	0	0	0	0	0	0	0	0	0	0	0	0	0	0	0	0	0	0	0	0	0	0	0.09	0.11	0.11	0.09	0.09	0.13	0.25	0.44	0.68	0.94	1.19	1.42	1.62
3		3,74	19,8	84,9	0	0	0	0	0	0	0	0	0	0	0	0	0	0	0	0	0	0	0	0	0	0	0	0	0	0	0	0	0	0	0	0	0.1	0.12	0.11	0.09	0.09	0.14	0.25	0.45	0.69	0.96	1.21	1.44	1.65
1	202.95	3,03	13,1	61,3	0	0	0	0	0	0	0	0	0	0	0	0	0	0	0	0	0	0	0	0	0	0	0	0	0	0	0	0	0	0	0.07	0.13	0.18	0.2	0.18	0.14	0.14	0.21	0.37	0.64	0.98	1.34	1.68	1.99	2.27
2		3,03	13,1	61,8	0	0	0	0	0	0	0	0	0	0	0	0	0	0	0	0	0	0	0	0	0	0	0	0	0	0	0	0	0	0	0.07	0.13	0.18	0.2	0.18	0.15	0.14	0.21	0.37	0.64	0.98	1.34	1.69	2	2.27
3		3,03	13,1	61,7	0	0	0	0	0	0	0	0	0	0	0	0	0	0	0	0	0	0	0	0	0	0	0	0	0	0	0	0	0	0	0.07	0.13	0.18	0.2	0.18	0.15	0.14	0.21	0.38	0.64	0.98	1.34	1.69	1.99	2.27
1	206.37	3,25	15,0	69,1	0	0	0	0	0	0	0	0	0	0	0	0	0	0	0	0	0	0	0	0	0	0	0	0	0	0	0	0	0	0	0.06	0.12	0.16	0.17	0.16	0.13	0.13	0.18	0.33	0.57	0.86	1.18	1.48	1.76	2.02
2		3,26	15,1	70,1	0	0	0	0	0	0	0	0	0	0	0	0	0	0	0	0	0	0	0	0	0	0	0	0	0	0	0	0	0	0	0.06	0.12	0.16	0.17	0.16	0.13	0.12	0.18	0.33	0.56	0.86	1.17	1.48	1.75	2.01
3		3,24	14,9	66,4	0	0	0	0	0	0	0	0	0	0	0	0	0	0	0	0	0	0	0	0	0	0	0	0	0	0	0	0	0	0	0.06	0.12	0.16	0.18	0.16	0.13	0.13	0.19	0.33	0.57	0.87	1.18	1.49	1.77	2.03
1	208.08	3,14	13,7	66,2	0	0	0	0	0	0	0	0	0	0	0	0	0	0	0	0	0	0	0	0	0	0	0	0	0	0	0	0	0	0	0.07	0.13	0.18	0.19	0.17	0.14	0.13	0.2	0.35	0.6	0.91	1.25	1.57	1.87	2.14
2		3,14	13,7	66,0	0	0	0	0	0	0	0	0	0	0	0	0	0	0	0	0	0	0	0	0	0	0	0	0	0	0	0	0	0	0	0.07	0.13	0.18	0.19	0.17	0.14	0.13	0.2	0.35	0.6	0.92	1.25	1.58	1.87	2.14
3		3,13	13,6	65,1	0	0	0	0	0	0	0	0	0	0	0	0	0	0	0	0	0	0	0	0	0	0	0	0	0	0	0	0	0	0	0.07	0.13	0.18	0.19	0.17	0.14	0.14	0.2	0.36	0.61	0.92	1.26	1.58	1.88	2.15
1	209.8	3,24	14,1	63,3	0	0	0	0	0	0	0	0	0	0	0	0	0	0	0	0	0	0	0	0	0	0	0	0	0	0	0	0	0	0	0	0.09	0.14	0.16	0.15	0.12	0.11	0.17	0.32	0.56	0.87	1.21	1.53	1.81	2.08
2		3,22	13,8	60,5	0	0	0	0	0	0	0	0	0	0	0	0	0	0	0	0	0	0	0	0	0	0	0	0	0	0	0	0	0	0	0	0.09	0.14	0.16	0.15	0.12	0.11	0.17	0.33	0.57	0.89	1.22	1.55	1.84	2.11
3		3,22	13,9	61,7	0	0	0	0	0	0	0	0	0	0	0	0	0	0	0	0	0	0	0	0	0	0	0	0	0	0	0	0	0	0	0	0.09	0.14	0.16	0.15	0.12	0.12	0.17	0.33	0.57	0.88	1.22	1.54	1.83	2.1
1	211.05	3,88	19,0	76,3	0	0	0	0	0	0	0	0	0	0	0	0	0	0	0	0	0	0	0	0	0	0	0	0	0	0	0	0	0	0	0	0	0.07	0.09	0.09	0.07	0.07	0.12	0.23	0.41	0.64	0.9	1.14	1.37	1.58
2		3,88	19,0	76,2	0	0	0	0	0	0	0	0	0	0	0	0	0	0	0	0	0	0	0	0	0	0	0	0	0	0	0	0	0	0	0	0	0.07	0.09	0.09	0.07	0.07	0.11	0.23	0.41	0.64	0.9	1.14	1.37	1.58
3		3,88	19,0	77,2	0	0	0	0	0	0	0	0	0	0	0	0	0	0	0	0	0	0	0	0	0	0	0	0	0	0	0	0	0	0	0	0	0.07	0.09	0.09	0.07	0.07	0.11	0.23	0.41	0.64	0.9	1.14	1.37	1.58
1	213.5	4,20	22,8	103	0	0	0	0	0	0	0	0	0	0	0	0	0	0	0	0	0	0	0	0	0	0	0	0	0	0	0	0	0	0	0	0	0	0.07	0.07	0.06	0.07	0.11	0.21	0.37	0.57	0.8	1.02	1.22	1.4
2		4,23	23,4	110	0	0	0	0	0	0	0	0	0	0	0	0	0	0	0	0	0	0	0	0	0	0	0	0	0	0	0	0	0	0	0	0	0	0.07	0.07	0.06	0.06	0.1	0.2	0.36	0.57	0.79	1	1.2	1.38
3		4,18	22,6	100	0	0	0	0	0	0	0	0	0	0	0	0	0	0	0	0	0	0	0	0	0	0	0	0	0	0	0	0	0	0	0	0	0	0.07	0.07	0.06	0.07	0.11	0.21	0.37	0.58	0.8	1.02	1.22	1.41
1	214.5	4,11	23,3	116	0	0	0	0	0	0	0	0	0	0	0	0	0	0	0	0	0	0	0	0	0	0	0	0	0	0	0	0	0	0	0	0	0.06	0.08	0.08	0.07	0.07	0.11	0.21	0.38	0.59	0.82	1.05	1.25	1.44
2		4,12	23,5	119	0	0	0	0	0	0	0	0	0	0	0	0	0	0	0	0	0	0	0	0	0	0	0	0	0	0	0	0	0	0	0	0	0.06	0.08	0.08	0.07	0.07	0.11	0.21	0.38	0.59	0.82	1.04	1.24	1.43
3		4,10	23,3	115	0	0	0	0	0	0	0	0	0	0	0	0	0	0	0	0	0	0	0	0	0	0	0	0	0	0	0	0	0	0	0	0	0.06	0.08	0.08	0.07	0.07	0.11	0.21	0.38	0.59	0.83	1.05	1.25	1.44
1	215	4,26	22,8	95,8	0	0	0	0	0	0	0	0	0	0	0	0	0	0	0	0	0	0	0	0	0	0	0	0	0	0	0	0	0	0	0	0	0	0.07	0.07	0.07	0.07	0.11	0.2	0.36	0.56	0.77	0.99	1.18	1.36
2		4,41	24,7	127	0	0	0	0	0	0	0	0	0	0	0	0	0	0	0	0	0	0	0	0	0	0	0	0	0	0	0	0	0	0	0	0	0	0.07	0.07	0.06	0.06	0.1	0.19	0.34	0.53	0.74	0.94	1.12	1.3
3		4,37	24,3	115	0	0	0	0	0	0	0	0	0	0	0	0	0	0	0	0	0	0	0	0	0	0	0	0	0	0	0	0	0	0	0	0	0	0.07	0.07	0.06	0.07	0.1	0.2	0.34	0.54	0.74	0.95	1.13	1.31
1	216.08	3,95	20,2	78,9	0	0	0	0	0	0	0	0	0	0	0	0	0	0	0	0	0	0	0	0	0	0	0	0	0	0	0	0	0	0	0	0	0	0.07	0.08	0.07	0.07	0.11	0.22	0.4	0.63	0.89	1.13	1.35	1.55
2		3,96	20,4	81,4	0	0	0	0	0	0	0	0	0	0	0	0	0	0	0	0	0	0	0	0	0	0	0	0	0	0	0	0	0	0	0	0	0	0.07	0.08	0.07	0.07	0.11	0.22	0.4	0.63	0.88	1.12	1.34	1.54
3		3,96	20,3	80,8	0	0	0	0	0	0	0	0	0	0	0	0	0	0	0	0	0	0	0	0	0	0	0	0	0	0	0	0	0	0	0	0	0	0.07	0.08	0.07	0.07	0.11	0.22	0.4	0.63	0.89	1.13	1.34	1.55
1	216.65	3,90	19,7	88,4	0	0	0	0	0	0	0	0	0	0	0	0	0	0	0	0	0	0	0	0	0	0	0	0	0	0	0	0	0	0	0	0	0	0	0	0	0	0.11	0.23	0.42	0.66	0.93	1.19	1.42	1.64
2		3,97	20,7	111	0	0	0	0	0	0	0	0	0	0	0	0	0	0	0	0	0	0	0	0	0	0	0	0	0	0	0	0	0	0	0	0	0	0	0	0	0	0.11	0.23	0.41	0.64	0.9	1.15	1.38	1.59
3		3,92	20,0	95,4	0	0	0	0	0	0	0	0	0	0	0	0	0	0	0	0	0	0	0	0	0	0	0	0	0	0	0	0	0	0	0	0	0	0	0	0	0	0.11	0.23	0.42	0.66	0.92	1.17	1.41	1.62
1	218.39	2,30	6,32	62,3	0	0	0	0	0	0	0	0	0	0	0	0	0	0	0	0	0	0	0	0	0	0	0	0	0	0	0	0	0	0	0	0.07	0.1	0.12	0.12	0.14	0.22	0.42	0.79	1.33	1.99	2.71	3.41	4.03	4.57
2		2,31	6,34	61,8	0	0	0	0	0	0	0	0	0	0	0	0	0	0	0	0	0	0	0	0	0	0	0	0	0	0	0	0	0	0	0	0.06	0.1	0.11	0.11	0.13	0.21	0.41	0.78	1.3	1.96	2.67	3.37	3.99	4.53
3		2,33	6,39	63,0	0	0	0	0	0	0	0	0	0	0	0	0	0	0	0	0	0	0	0	0	0	0	0	0	0	0	0	0	0	0	0	0	0.09	0.11	0.11	0.13	0.21	0.41	0.77	1.3	1.95	2.65	3.34	3.96	4.5
1	218.93	4,96	16,7	63,5	0	0	0	0	0	0	0	0	0	0	0	0	0	0	0	0	0	0	0	0	0	0	0	0	0	0	0	0	0	0	0	0	0	0	0	0	0	0	0	0.19	0.38	0.58	0.77	0.93	1.08
2		4,93	15,9	48,8	0	0	0	0	0	0	0	0	0	0	0	0	0	0	0	0	0	0	0	0	0	0	0	0	0	0	0	0	0	0	0	0	0	0	0	0	0	0	0	0.18	0.37	0.58	0.76	0.92	1.08
3		5,00	16,0	53,0	0	0	0	0	0	0	0	0	0	0	0	0	0	0	0	0	0	0	0	0	0	0	0	0	0	0	0	0	0	0	0	0	0	0	0	0	0	0	0	0.18	0.37	0.57	0.75	0.91	1.05
1	221.21	4,89	34,0	279	0	0	0	0	0	0	0	0	0	0	0	0	0	0	0	0	0	0	0	0	0	0	0	0	0	0	0	0	0	0	0	0	0	0	0	0	0	0.07	0.16	0.29	0.47	0.66	0.84	1	1.15
2		4,93	34,7	306	0	0	0	0	0	0	0	0	0	0	0	0	0	0	0	0	0	0	0	0	0	0	0	0	0	0	0	0	0	0	0	0	0	0	0	0	0	0.07	0.16	0.29	0.46	0.65	0.83	0.99	1.14
3		4,90	34,2	297	0	0	0	0	0	0	0	0	0	0	0	0	0	0	0	0	0	0	0	0	0	0	0	0	0	0	0	0	0	0	0	0	0	0	0	0	0	0.07	0.16	0.29	0.47	0.66	0.84	1	1.15
1	222.93	4,10	23,0	93,6	0	0	0	0	0	0	0	0	0	0	0	0	0	0	0	0	0	0	0	0	0	0	0	0	0	0	0	0	0	0	0	0	0	0	0	0	0.06	0.11	0.22	0.39	0.62	0.86	1.09	1.3	1.49
2		4,09	22,7	91,7	0	0	0	0	0	0	0	0	0	0	0	0	0	0	0	0	0	0	0	0	0	0	0	0	0	0	0	0	0	0	0	0	0	0	0	0	0.06	0.11	0.22	0.4	0.62	0.87	1.1	1.31	1.5
3		4,12	23,2	95,7	0	0	0	0	0	0	0	0	0	0	0	0	0	0	0	0	0	0	0	0	0	0	0	0	0	0	0	0	0	0	0	0	0	0	0	0	0.06	0.11	0.22	0.39	0.61	0.86	1.09	1.3	1.49
1	223.5	3,95	20,2	86,9	0	0	0	0	0	0	0	0	0	0	0	0	0	0	0	0	0	0	0	0	0	0	0	0	0	0	0	0	0	0	0	0	0	0	0	0	0.06	0.12	0.24	0.43	0.66	0.91	1.16	1.38	1.58
2		3,95	20,1	88,6	0	0	0	0	0	0	0	0	0	0	0	0	0	0	0	0	0	0	0	0	0	0	0	0	0	0	0	0	0	0	0	0	0	0	0	0	0.06	0.12	0.24	0.43	0.66	0.91	1.16	1.38	1.58
3		3,96	20,4	93,4	0	0	0	0	0	0	0	0	0	0	0	0	0	0	0	0	0	0	0	0	0	0	0	0	0	0	0	0	0	0	0	0	0	0	0	0	0.06	0.12	0.24	0.42	0.65	0.91	1.15	1.37	1.57
1	224.07	4,17	21,0	82,9	0	0	0	0	0	0	0	0	0	0	0	0	0	0	0	0	0	0	0	0	0	0	0	0	0	0	0	0	0	0	0	0	0	0	0	0	0.06	0.12	0.23	0.39	0.61	0.84	1.06	1.26	1.44
2		4,15	20,8	80,6	0	0	0	0	0	0	0	0	0	0	0	0	0	0	0	0	0	0	0	0	0	0	0	0	0	0	0	0	0	0	0	0	0	0	0	0	0.06	0.12	0.23	0.4	0.61	0.84	1.07	1.27	1.45
3		4,16	20,9	82,8	0	0	0	0	0	0	0	0	0	0	0	0	0	0	0	0	0	0	0	0	0	0	0	0	0	0	0	0	0	0	0	0	0	0	0	0	0.06	0.12	0.23	0.4	0.61	0.84	1.07	1.27	1.45
1	225.21	3,73	17,7	69,3	0	0	0	0	0	0	0	0	0	0	0	0	0	0	0	0	0	0	0	0	0	0	0	0	0	0	0	0	0	0	0	0	0	0	0	0.06	0.09	0.15	0.28	0.48	0.73	1	1.27	1.5	1.71
2		3,73	17,7	69,0	0	0	0	0	0	0	0	0	0	0	0	0	0	0	0	0	0	0	0	0	0	0	0	0	0	0	0	0	0	0	0	0	0	0	0	0.06	0.09	0.15	0.28	0.48	0.73	1	1.27	1.5	1.71
3		3,72	17,6	69,5	0	0	0	0	0	0	0	0	0	0	0	0	0	0	0	0	0	0	0	0	0	0	0	0	0	0	0	0	0	0	0	0	0	0	0	0.06	0.09	0.15	0.28	0.48	0.73	1.01	1.27	1.5	1.71
1	226.35	3,91	20,0	89,6	0	0	0	0	0	0	0	0	0	0	0	0	0	0	0	0	0	0	0	0	0	0	0	0	0	0	0	0	0	0	0	0	0	0	0	0.06	0.09	0.15	0.27	0.45	0.68	0.93	1.17	1.38	1.57
2		3,92	20,0	90,1	0	0	0	0	0	0	0	0	0	0	0	0	0	0	0	0	0	0	0	0	0	0	0	0	0	0	0	0	0	0	0	0	0	0	0	0	0.08	0.15	0.27	0.45	0.68	0.93	1.17	1.39	1.58
3		3,89	19,7	86,2	0	0	0	0	0	0	0	0	0	0	0	0	0	0	0	0	0	0	0	0	0	0	0	0	0	0	0	0	0	0	0	0	0	0	0	0.06	0.09	0.15	0.27	0.45	0.69	0.94	1.18	1.39	1.59
1	227.49	4,67	26,7	141	0	0	0	0	0	0	0	0	0	0	0	0	0	0	0	0	0	0	0	0	0	0	0	0	0	0	0	0	0	0	0	0	0	0	0	0	0	0.1	0.2	0.34	0.52	0.72	0.91	1.08	1.23
2		4,63	26,2	134	0	0	0	0	0	0	0	0	0	0	0	0	0	0	0	0	0	0	0	0	0	0	0	0	0	0	0	0	0	0	0	0	0	0	0	0	0	0.1	0.2	0.35	0.53	0.73	0.92	1.09	1.24
3		4,66	26,6	143	0	0	0	0	0	0	0	0	0	0	0	0	0	0	0	0	0	0	0	0	0	0	0	0	0	0	0	0	0	0	0	0	0	0	0	0	0	0.1	0.2	0.34	0.52	0.72	0.91	1.08	1.23
1	229.78	4,63	26,1	143	0	0	0	0	0	0	0	0	0	0	0	0	0	0	0	0	0	0	0	0	0	0	0	0	0	0	0	0	0	0	0	0	0	0	0	0	0	0.11	0.2	0.35	0.53	0.73	0.92	1.09	1.24
2		4,65	26,3	150	0	0	0	0	0	0	0	0	0	0	0	0	0	0	0	0	0	0	0	0	0	0	0	0	0	0	0	0	0	0	0	0	0	0	0	0	0	0.11	0.2	0.35	0.53	0.73	0.92	1.09	1.24
3		4,63	26,1	146	0	0	0	0	0	0	0	0	0	0	0	0	0	0	0	0	0	0	0	0	0	0	0	0	0	0	0	0	0	0	0	0	0	0	0	0	0	0.11	0.2	0.35	0.53	0.73	0.92	1.09	1.24
1	230.35	4,31	24,0	133	0	0	0	0	0	0	0	0	0	0	0	0	0	0	0	0	0	0	0	0	0	0	0	0	0	0	0	0	0	0	0	0	0	0	0	0	0	0.12	0.22	0.39	0.59	0.82	1.03	1.21	1.38
2		4,27	23,4	125	0	0	0	0	0	0	0	0	0	0	0	0	0	0	0	0	0	0	0	0	0	0	0	0	0	0	0	0	0	0	0	0	0	0	0	0	0	0.12	0.23	0.39	0.6	0.83	1.04	1.23	1.4
3		4,37	24,5	127	0	0	0	0	0	0	0	0	0	0	0	0	0	0	0	0	0	0	0	0	0	0	0	0	0	0	0	0	0	0	0	0	0	0	0	0	0	0.11	0.22	0.38	0.58	0.8	1	1.19	1.35
1	231.72	3,74	18,5	86,8	0	0	0	0	0	0	0	0	0	0	0	0	0	0	0	0	0	0	0	0	0	0	0	0	0	0	0	0	0	0	0	0	0	0	0	0	0.08	0.15	0.29	0.48	0.73	1	1.26	1.49	1.7
2		3,70	18,0	79,5	0	0	0	0	0	0	0	0	0	0	0	0	0	0	0	0	0	0	0	0	0	0	0	0	0	0	0	0	0	0	0	0	0	0	0	0.06	0.09	0.16	0.29	0.49	0.74	1.02	1.28	1.52	1.73
3		3,71	18,1	81,6	0	0	0	0	0	0	0	0	0	0	0	0	0	0	0	0	0	0	0	0	0	0	0	0	0	0	0	0	0	0	0	0	0	0	0	0	0.09	0.16	0.29	0.49	0.74	1.02	1.28	1.52	1.73
1	233.54	3,86	20,1	83,0	0	0	0	0	0	0	0	0	0	0	0	0	0	0	0	0	0	0	0	0	0	0	0	0	0	0	0	0	0	0	0	0	0	0	0	0.07	0.1	0.16	0.29	0.47	0.7	0.95	1.2	1.41	1.6
2		3,83	19,8	82,1	0	0	0	0	0	0	0	0	0	0	0	0	0	0	0	0	0	0	0	0	0	0	0	0	0	0	0	0	0	0	0	0	0	0	0	0.07	0.1	0.16	0.29	0.47	0.71	0.96	1.21	1.42	1.61
3		3,84	19,9	82,7	0	0	0	0	0	0	0	0	0	0	0	0	0	0	0	0	0	0	0	0	0	0	0	0	0	0	0	0	0	0	0	0	0	0	0	0.07	0.1	0.16	0.29	0.47	0.71	0.96	1.2	1.42	1.61
1	235.48	3,94	19,4	80,7	0	0	0	0	0	0	0	0	0	0	0	0	0	0	0	0	0	0	0	0	0	0	0	0	0	0	0	0	0	0	0	0	0	0	0	0	0.07	0.13	0.25	0.44	0.68	0.93	1.17	1.39	1.58
2		3,89	18,9	74,4	0	0	0	0	0	0	0	0	0	0	0	0	0	0	0	0	0	0	0	0	0	0	0	0	0	0	0	0	0	0	0	0	0	0	0	0	0.07	0.13	0.26	0.45	0.69	0.95	1.2	1.41	1.61
3		3,89	18,9	75,8	0	0	0	0	0	0	0	0	0	0	0	0	0	0	0	0	0	0	0	0	0	0	0	0	0	0	0	0	0	0	0	0	0	0	0	0	0.07	0.13	0.26	0.45	0.69	0.95	1.2	1.41	1.61
1	237.77	3,68	17,8	66,0	0	0	0	0	0	0	0	0	0	0	0	0	0	0	0	0	0	0	0	0	0	0	0	0	0	0	0	0	0	0	0	0	0	0	0	0.07	0.1	0.17	0.3	0.5	0.76	1.03	1.29	1.52	1.72
2		3,70	17,9	66,5	0	0	0	0	0	0	0	0	0	0	0	0	0	0	0	0	0	0	0	0	0	0	0	0	0	0	0	0	0	0	0	0	0	0	0	0.07	0.1	0.17	0.3	0.5	0.75	1.02	1.28	1.51	1.71
3		3,69	17,8	66,0	0	0	0	0	0	0	0	0	0	0	0	0	0	0	0	0	0	0	0	0	0	0	0	0	0	0	0	0	0	0	0	0	0	0	0	0.07	0.1	0.17	0.3	0.5	0.75	1.03	1.29	1.52	1.72
1	239.02	4,14	23,2	110	0	0	0	0	0	0	0	0	0	0	0	0	0	0	0	0	0	0	0	0	0	0	0	0	0	0	0	0	0	0	0	0	0	0	0	0	0.07	0.13	0.24	0.41	0.63	0.86	1.08	1.28	1.45
2		4,10	22,6	101	0	0	0	0	0	0	0	0	0	0	0	0	0	0	0	0	0	0	0	0	0	0	0	0	0	0	0	0	0	0	0	0	0	0	0	0	0.07	0.13	0.25	0.42	0.64	0.87	1.1	1.3	1.48
3		4,11	22,8	105	0	0	0	0	0	0	0	0	0	0	0	0	0	0	0	0	0	0	0	0	0	0	0	0	0	0	0	0	0	0	0	0	0	0	0	0	0.07	0.13	0.24	0.42	0.63	0.87	1.09	1.29	1.47
1	240.39	3,57	20,1	107	0	0	0	0	0	0	0	0	0	0	0	0	0	0	0	0	0	0	0	0	0	0	0	0	0	0	0	0	0	0	0	0	0.06	0.08	0.09	0.1	0.12	0.18	0.32	0.52	0.78	1.05	1.32	1.55	1.76
2		3,53	19,5	98,5	0	0	0	0	0	0	0	0	0	0	0	0	0	0	0	0	0	0	0	0	0	0	0	0	0	0	0	0	0	0	0	0	0.06	0.08	0.09	0.1	0.12	0.19	0.32	0.53	0.79	1.07	1.34	1.58	1.8
3		3,51	19,2	97,7	0	0	0	0	0	0	0	0	0	0	0	0	0	0	0	0	0	0	0	0	0	0	0	0	0	0	0	0	0	0	0	0	0.06	0.09	0.09	0.1	0.12	0.19	0.33	0.54	0.8	1.08	1.36	1.6	1.81
1	242.33	3,60	20,5	106	0	0	0	0	0	0	0	0	0	0	0	0	0	0	0	0	0	0	0	0	0	0	0	0	0	0	0	0	0	0	0	0	0	0.07	0.08	0.09	0.12	0.18	0.32	0.52	0.77	1.04	1.31	1.54	1.75
2		3,59	20,1	104	0	0	0	0	0	0	0	0	0	0	0	0	0	0	0	0	0	0	0	0	0	0	0	0	0	0	0	0	0	0	0	0	0	0.07	0.09	0.09	0.12	0.18	0.32	0.52	0.78	1.05	1.32	1.56	1.77
3		3,57	19,9	102	0	0	0	0	0	0	0	0	0	0	0	0	0	0	0	0	0	0	0	0	0	0	0	0	0	0	0	0	0	0	0	0	0	0.08	0.09	0.09	0.12	0.19	0.32	0.52	0.78	1.06	1.33	1.57	1.78
1	243.48	3,30	17,4	97,8	0	0	0	0	0	0	0	0	0	0	0	0	0	0	0	0	0	0	0	0	0	0	0	0	0	0	0	0	0	0	0	0	0.08	0.11	0.11	0.11	0.14	0.21	0.36	0.59	0.88	1.19	1.49	1.76	1.99
2		3,32	17,8	102	0	0	0	0	0	0	0	0	0	0	0	0	0	0	0	0	0	0	0	0	0	0	0	0	0	0	0	0	0	0	0	0	0.08	0.11	0.11	0.11	0.14	0.21	0.36	0.59	0.87	1.18	1.47	1.74	1.97
3		3,31	17,5	99,3	0	0	0	0	0	0	0	0	0	0	0	0	0	0	0	0	0	0	0	0	0	0	0	0	0	0	0	0	0	0	0	0	0.08	0.11	0.12	0.12	0.14	0.21	0.36	0.59	0.88	1.19	1.49	1.75	1.99
1	244.62	3,60	22,0	126	0	0	0	0	0	0	0	0	0	0	0	0	0	0	0	0	0	0	0	0	0	0	0	0	0	0	0	0	0	0	0	0	0.08	0.1	0.11	0.11	0.13	0.2	0.33	0.52	0.76	1.02	1.28	1.51	1.71
2		3,62	22,4	131	0	0	0	0	0	0	0	0	0	0	0	0	0	0	0	0	0	0	0	0	0	0	0	0	0	0	0	0	0	0	0	0	0.08	0.1	0.11	0.11	0.13	0.2	0.33	0.52	0.75	1.01	1.27	1.49	1.7
3		3,58	21,7	123	0	0	0	0	0	0	0	0	0	0	0	0	0	0	0	0	0	0	0	0	0	0	0	0	0	0	0	0	0	0	0	0	0.09	0.1	0.11	0.11	0.13	0.2	0.33	0.52	0.77	1.03	1.29	1.52	1.73
1	245.19	3,32	17,7	91,2	0	0	0	0	0	0	0	0	0	0	0	0	0	0	0	0	0	0	0	0	0	0	0	0	0	0	0	0	0	0	0	0	0.08	0.11	0.12	0.12	0.13	0.21	0.36	0.59	0.88	1.19	1.48	1.74	1.97
2		3,30	17,4	88,0	0	0	0	0	0	0	0	0	0	0	0	0	0	0	0	0	0	0	0	0	0	0	0	0	0	0	0	0	0	0	0	0	0.08	0.11	0.12	0.12	0.14	0.21	0.36	0.59	0.89	1.2	1.5	1.76	1.99
3		3,31	17,6	89,9	0	0	0	0	0	0	0	0	0	0	0	0	0	0	0	0	0	0	0	0	0	0	0	0	0	0	0	0	0	0	0	0	0.08	0.11	0.12	0.12	0.14	0.21	0.36	0.59	0.88	1.19	1.49	1.75	1.98
1	248.04	3,29	17,0	91,7	0	0	0	0	0	0	0	0	0	0	0	0	0	0	0	0	0	0	0	0	0	0	0	0	0	0	0	0	0	0	0	0	0.08	0.1	0.11	0.11	0.13	0.21	0.36	0.6	0.89	1.2	1.51	1.78	2.02
2		3,28	16,8	91,7	0	0	0	0	0	0	0	0	0	0	0	0	0	0	0	0	0	0	0	0	0	0	0	0	0	0	0	0	0	0	0	0	0.08	0.1	0.11	0.11	0.14	0.21	0.36	0.6	0.89	1.21	1.51	1.78	2.03
3		3,28	16,7	89,9	0	0	0	0	0	0	0	0	0	0	0	0	0	0	0	0	0	0	0	0	0	0	0	0	0	0	0	0	0	0	0	0	0.08	0.1	0.11	0.11	0.14	0.21	0.37	0.6	0.89	1.21	1.52	1.79	2.03
1	249.76	3,50	20,4	107	0	0	0	0	0	0	0	0	0	0	0	0	0	0	0	0	0	0	0	0	0	0	0	0	0	0	0	0	0	0	0	0	0.06	0.08	0.09	0.09	0.12	0.18	0.32	0.54	0.8	1.09	1.37	1.61	1.83
2		3,49	20,3	103	0	0	0	0	0	0	0	0	0	0	0	0	0	0	0	0	0	0	0	0	0	0	0	0	0	0	0	0	0	0	0	0	0.06	0.08	0.09	0.1	0.12	0.19	0.33	0.54	0.81	1.1	1.38	1.62	1.83
3		3,48	20,1	104	0	0	0	0	0	0	0	0	0	0	0	0	0	0	0	0	0	0	0	0	0	0	0	0	0	0	0	0	0	0	0	0	0.06	0.08	0.09	0.1	0.12	0.19	0.33	0.54	0.81	1.1	1.38	1.63	1.84
1	250.9	3,00	16,4	133	0	0	0	0	0	0	0	0	0	0	0	0	0	0	0	0	0	0	0	0	0	0	0	0	0	0	0	0	0	0	0.07	0.11	0.14	0.15	0.15	0.14	0.16	0.26	0.44	0.7	1.03	1.38	1.71	2.01	2.27
2		3,00	16,5	140	0	0	0	0	0	0	0	0	0	0	0	0	0	0	0	0	0	0	0	0	0	0	0	0	0	0	0	0	0	0	0.07	0.11	0.14	0.16	0.15	0.14	0.16	0.26	0.43	0.7	1.03	1.38	1.71	2.01	2.27
3		2,98	16,0	127	0	0	0	0	0	0	0	0	0	0	0	0	0	0	0	0	0	0	0	0	0	0	0	0	0	0	0	0	0	0	0.07	0.11	0.15	0.16	0.15	0.14	0.17	0.26	0.44	0.71	1.04	1.4	1.74	2.04	2.3
1	253.75	3,32	19,1	117	0	0	0	0	0	0	0	0	0	0	0	0	0	0	0	0	0	0	0	0	0	0	0	0	0	0	0	0	0	0	0	0	0.06	0.08	0.08	0.08	0.1	0.18	0.34	0.58	0.88	1.21	1.52	1.79	2.02
2		3,26	17,9	102	0	0	0	0	0	0	0	0	0	0	0	0	0	0	0	0	0	0	0	0	0	0	0	0	0	0	0	0	0	0	0	0	0.06	0.08	0.09	0.09	0.11	0.19	0.35	0.6	0.91	1.25	1.57	1.85	2.1
3		3,27	18,2	110	0	0	0	0	0	0	0	0	0	0	0	0	0	0	0	0	0	0	0	0	0	0	0	0	0	0	0	0	0	0	0	0	0.06	0.08	0.09	0.08	0.1	0.18	0.34	0.59	0.9	1.24	1.56	1.84	2.08
1	256.61	3,32	21,8	112	0	0	0	0	0	0	0	0	0	0	0	0	0	0	0	0	0	0	0	0	0	0	0	0	0	0	0	0	0	0	0	0.07	0.1	0.12	0.12	0.12	0.14	0.21	0.36	0.58	0.87	1.17	1.46	1.72	1.94
2		3,32	21,8	115	0	0	0	0	0	0	0	0	0	0	0	0	0	0	0	0	0	0	0	0	0	0	0	0	0	0	0	0	0	0	0	0.07	0.1	0.12	0.12	0.12	0.14	0.21	0.36	0.59	0.87	1.17	1.46	1.72	1.94
3		3,30	21,3	112	0	0	0	0	0	0	0	0	0	0	0	0	0	0	0	0	0	0	0	0	0	0	0	0	0	0	0	0	0	0	0	0.07	0.1	0.12	0.12	0.12	0.14	0.21	0.36	0.59	0.87	1.18	1.47	1.73	1.96
1	258.32	3,28	20,3	125	0	0	0	0	0	0	0	0	0	0	0	0	0	0	0	0	0	0	0	0	0	0	0	0	0	0	0	0	0	0	0	0	0.09	0.11	0.11	0.11	0.13	0.21	0.36	0.6	0.9	1.22	1.52	1.78	2.01
2		3,28	20,4	129	0	0	0	0	0	0	0	0	0	0	0	0	0	0	0	0	0	0	0	0	0	0	0	0	0	0	0	0	0	0	0	0	0.09	0.11	0.11	0.11	0.13	0.21	0.36	0.6	0.9	1.21	1.52	1.78	2.01
3		3,27	20,0	123	0	0	0	0	0	0	0	0	0	0	0	0	0	0	0	0	0	0	0	0	0	0	0	0	0	0	0	0	0	0	0	0	0.09	0.11	0.12	0.11	0.13	0.21	0.37	0.61	0.9	1.22	1.53	1.79	2.02
1	260.72	3,95	33,4	183	0	0	0	0	0	0	0	0	0	0	0	0	0	0	0	0	0	0	0	0	0	0	0	0	0	0	0	0	0	0	0	0	0	0.06	0.07	0.07	0.09	0.15	0.27	0.45	0.68	0.92	1.15	1.35	1.52
2		3,92	32,5	177	0	0	0	0	0	0	0	0	0	0	0	0	0	0	0	0	0	0	0	0	0	0	0	0	0	0	0	0	0	0	0	0	0	0.06	0.07	0.07	0.09	0.15	0.27	0.46	0.68	0.93	1.16	1.37	1.54
3		3,95	33,4	183	0	0	0	0	0	0	0	0	0	0	0	0	0	0	0	0	0	0	0	0	0	0	0	0	0	0	0	0	0	0	0	0	0	0.06	0.07	0.07	0.09	0.15	0.27	0.45	0.68	0.92	1.15	1.35	1.52
[truncated: 56 more columns]

## Sheet: Fig.6 PCA Berglivatnet
Depth (cm)	Unit	Subunit	Ca_TSN	Ti_TSN	Mn_TSN	Fe_TSN	Ni_TSN	Cu_TSN	IncCoh	CTGrayscale
0	Unit1	Unit1A	0.937213	1.92819	1.24776	69.1443	0.0685992	0.127001	3.9544	4954.39
0.02	Unit1	Unit1A	0.882078	1.83979	1.21959	69.3135	0.10116	0.11156	3.70941	4762.56
0.04	Unit1	Unit1A	0.899325	1.85094	1.29195	69.8089	0.0998194	0.174922	3.62262	4849.81
0.06	Unit1	Unit1A	0.962132	1.89247	1.23983	70.6713	0.057036	0.143058	3.59478	4930.46
0.08	Unit1	Unit1A	1.03086	2.04227	1.14756	71.059	0.11948	0.128742	3.53931	4892.95
0.1	Unit1	Unit1A	0.988509	2.00194	1.13711	71.0204	0.0793761	0.127371	3.49473	4800.75
0.12	Unit1	Unit1A	1.07258	2.09678	1.08627	71.253	0.101325	0.123233	3.42857	4881.98
0.14	Unit1	Unit1A	1.03564	1.97439	1.10694	71.7608	0.0712973	0.128884	3.30863	4894.55
0.16	Unit1	Unit1A	1.04294	2.0831	1.04571	71.738	0.0379082	0.125744	3.45125	4856.77
0.18	Unit1	Unit1A	1.06972	2.08087	1.10998	71.5952	0.107063	0.169288	3.32339	4831.65
0.2	Unit1	Unit1A	1.00594	2.09236	1.18153	71.561	0.0896205	0.123457	3.48791	4928.07
0.22	Unit1	Unit1A	1.02515	1.94696	1.11466	71.5753	0.0793548	0.0645911	3.32861	5058.32
0.24	Unit1	Unit1A	1.07977	2.13749	1.1487	71.3506	0.0744355	0.122221	3.313	5003.64
0.26	Unit1	Unit1A	1.03375	2.16988	1.11145	71.4397	0.0941439	0.17732	3.25553	4910.4
0.28	Unit1	Unit1A	1.12695	1.96055	1.16431	71.5192	0.0610395	0.112969	3.33165	4842.65
0.3	Unit1	Unit1A	1.14073	1.93824	1.1344	71.9813	0.0704486	0.0794805	3.36325	4778.37
0.32	Unit1	Unit1A	1.06368	1.99764	1.13793	71.7557	0.0670949	0.11093	3.30365	4900.53
0.34	Unit1	Unit1A	1.09794	2.04132	1.18944	71.3815	0.0790591	0.119921	3.3282	4860.98
0.36	Unit1	Unit1A	1.1721	2.06658	1.12747	71.9472	0.0749859	0.122298	3.25738	4882.06
0.38	Unit1	Unit1A	1.14625	2.11552	1.13726	71.7598	0.114086	0.0979159	3.34101	4946.67
0.4	Unit1	Unit1A	1.179	2.18333	1.20751	71.7263	0.11585	0.127435	3.23099	4781.92
0.42	Unit1	Unit1A	1.06189	2.17907	1.20544	71.9476	0.0936179	0.0633036	3.28634	4839.18
0.44	Unit1	Unit1A	1.0135	2.20769	1.1924	72.0478	0.0545661	0.0966089	3.41125	4876.18
0.46	Unit1	Unit1A	1.07045	2.05698	1.24544	71.8746	0.074994	0.113384	3.29861	4864.85
0.48	Unit1	Unit1A	1.02723	2.0256	1.18415	72.3605	0.0847756	0.0775606	3.4472	4841.07
0.5	Unit1	Unit1A	0.978998	2.12626	1.11667	72.0311	0.122375	0.0908813	3.35447	4908.61
0.52	Unit1	Unit1A	1.03545	2.24798	1.10502	72.1875	0.0840283	0.131012	3.3111	4740.92
0.54	Unit1	Unit1A	1.09208	2.37476	1.08757	72.3123	0.089426	0.098459	3.19299	4751.05
0.56	Unit1	Unit1A	1.0544	2.2749	1.08329	72.7779	0.0947876	0.102009	3.25955	4795.16
0.58	Unit1	Unit1A	1.06605	2.26052	1.13879	72.21	0.0925044	0.0314335	3.36878	4829.44
0.6	Unit1	Unit1A	1.13238	2.32242	1.19004	72.1436	0.0765731	0.172064	3.21297	4922.62
0.62	Unit1	Unit1A	1.12228	2.40104	1.17624	71.9394	0.0818331	0.0827323	3.23779	5142.52
0.64	Unit1	Unit1A	1.12969	2.33949	1.13236	72.3204	0.0418403	0.113948	3.3096	5113.42
0.66	Unit1	Unit1A	1.15708	2.23195	1.18183	72.6165	0.0539203	0.110492	3.21764	5054.15
0.68	Unit1	Unit1A	1.11254	2.18879	1.10015	72.5831	0.0867372	0.12391	3.18871	4978.48
0.7	Unit1	Unit1A	1.13839	2.1642	1.04457	72.339	0.0822074	0.107227	3.25245	4667.12
0.72	Unit1	Unit1A	1.11953	2.22545	1.12044	72.2141	0.046269	0.153323	3.18851	4650.37
0.74	Unit1	Unit1A	1.11208	2.31471	1.14377	72.1329	0.0959936	0.141274	3.22133	4806.35
0.76	Unit1	Unit1A	1.16747	2.31523	1.09221	71.8849	0.0797427	0.110206	3.22109	4995.38
0.78	Unit1	Unit1A	1.13763	2.28788	1.07278	72.1357	0.0846694	0.105386	3.21815	5138.75
0.8	Unit1	Unit1A	1.24008	2.29758	1.07468	71.8993	0.0551348	0.100327	3.25063	5224.68
0.82	Unit1	Unit1A	1.1033	2.23278	1.10059	71.5527	0.0803546	0.129109	3.04221	5337.15
0.84	Unit1	Unit1A	1.13075	2.23614	1.0556	71.6933	0.076047	0.0869109	3.29678	5362.12
0.86	Unit1	Unit1A	1.21131	2.26227	1.03646	71.7855	0.0616076	0.150395	3.27424	5379.31
0.88	Unit1	Unit1A	1.25092	2.21177	1.05603	71.6332	0.096085	0.0951785	3.2621	5316.66
0.9	Unit1	Unit1A	1.22981	2.24068	1.09827	71.9072	0.0450479	0.110818	3.14521	4922.69
0.92	Unit1	Unit1A	1.21031	2.33214	1.0024	71.3675	0.0557379	0.0875881	3.33505	4703.37
0.94	Unit1	Unit1A	1.14819	2.21877	1.02865	71.9357	0.134714	0.132038	3.28707	4825.04
0.96	Unit1	Unit1A	1.1981	2.26338	1.08711	71.6395	0.045486	0.0891525	3.37383	4980.91
0.98	Unit1	Unit1A	1.14248	2.25281	1.06834	71.956	0.0875399	0.121484	3.2198	5007.85
1	Unit1	Unit1A	1.11553	2.14621	1.20216	72.2494	0.0580539	0.0991381	3.20988	4910.62
1.02	Unit1	Unit1A	1.07785	2.15838	1.11541	71.6844	0.110021	0.12791	3.3164	4649.89
1.04	Unit1	Unit1A	1.03607	2.23286	1.1061	72.1463	0.0359124	0.132876	3.37921	4647.26
1.06	Unit1	Unit1A	1.05057	2.05751	1.13248	72.0682	0.0925926	0.129986	3.39849	4769.67
1.08	Unit1	Unit1A	1.11656	2.10161	1.16334	72.1433	0.0670821	0.101506	3.34339	4890.61
1.1	Unit1	Unit1A	0.992501	2.05117	1.12748	72.2109	0.0582267	0.1191	3.27217	4897.12
1.12	Unit1	Unit1A	0.974533	2.03331	1.16252	72.5012	0.0647324	0.0984287	3.23619	4906.3
1.14	Unit1	Unit1A	0.979723	2.00998	1.11538	72.2158	0.0354651	0.0842296	3.19168	4999.69
1.16	Unit1	Unit1A	1.04241	2.06534	1.11681	72.5005	0.0628814	0.0770518	3.20496	5138.06
1.18	Unit1	Unit1A	0.980134	2.21057	1.21814	72.1593	0.0641127	0.109782	3.19558	5210.12
1.2	Unit1	Unit1A	1.02498	2.10623	1.14102	72.2798	0.0210974	0.104608	3.24248	5015.63
1.22	Unit1	Unit1A	0.988154	2.14728	1.14247	72.2835	0.0885569	0.11223	3.26876	4740.42
1.24	Unit1	Unit1A	0.955499	2.23574	1.20887	72.609	0.0517451	0.074049	3.2783	4778.75
1.26	Unit1	Unit1A	1.02111	2.15381	1.16281	72.3635	0.0983032	0.140813	3.123	4901.52
1.28	Unit1	Unit1A	0.986813	2.10375	1.10383	72.3858	0.0882019	0.102174	3.2259	5027.09
1.3	Unit1	Unit1A	0.94575	2.12358	1.1342	72.561	0.0558377	0.108185	3.10838	5264.36
1.32	Unit1	Unit1A	1.06542	2.197	1.10776	72.4321	0.0899614	0.110247	3.21534	5516.67
1.34	Unit1	Unit1A	1.02596	2.1134	1.09359	72.2333	0.0852036	0.155475	3.16192	5580.79
1.36	Unit1	Unit1A	1.04212	2.13583	1.08409	71.9825	0.0769352	0.0952947	3.35357	5299.22
1.38	Unit1	Unit1A	1.02395	2.16392	1.14612	72.2733	0.0799824	0.102835	3.29711	4795.74
1.4	Unit1	Unit1A	1.00128	2.0904	1.19803	71.9711	0.113303	0.152827	3.29487	4538.69
1.42	Unit1	Unit1A	0.991003	2.18565	1.20079	72.0553	0.042133	0.0974325	3.06693	4787.29
1.44	Unit1	Unit1A	0.989665	2.15099	1.21212	72.158	0.0884568	0.100718	3.32476	5025.74
1.46	Unit1	Unit1A	1.02773	2.19035	1.20789	72.1866	0.0949625	0.0789875	3.39775	5229.94
1.48	Unit1	Unit1A	1.02468	2.26578	1.19075	72.1499	0.0220836	0.132502	3.17485	5409.67
1.5	Unit1	Unit1A	1.04495	2.19989	1.10083	71.8503	0.0620936	0.119752	3.18702	5605.23
1.52	Unit1	Unit1A	1.01361	2.20061	1.13187	72.3542	0.0337871	0.132481	3.26618	5213.11
1.54	Unit1	Unit1A	1.05875	2.09285	1.05083	72.1496	0.106491	0.114411	3.27365	4889.44
1.56	Unit1	Unit1A	0.973401	2.14272	1.09077	72.2585	0.0617752	0.174736	3.34168	4781.6
1.58	Unit1	Unit1A	1.08959	2.17568	1.21356	72.2706	0.102149	0.10826	3.30265	4901.25
1.6	Unit1	Unit1A	1.03828	2.25004	1.26467	72.3325	0.0988837	0.113629	3.13504	5108.01
1.62	Unit1	Unit1A	1.00179	2.17243	1.14033	72.7369	0.0484878	0.0623414	3.26051	5243.14
1.64	Unit1	Unit1A	0.957207	2.22138	1.16646	72.5601	0.0916567	0.115868	3.16061	5349.45
1.66	Unit1	Unit1A	0.955079	2.07962	1.14279	72.6164	0.126011	0.0643092	3.1659	5442.84
1.68	Unit1	Unit1A	0.936274	2.14931	1.07115	72.2061	0.118239	0.1305	3.2326	5557.21
1.7	Unit1	Unit1A	0.904129	2.11814	1.03266	71.9764	0.0880359	0.0862752	3.32442	5752.73
1.72	Unit1	Unit1A	0.963957	2.26741	0.917342	72.1341	0.0483738	0.111699	3.26938	5591.69
1.74	Unit1	Unit1A	0.984462	2.08526	0.94392	72.3813	0.076677	0.0960666	3.24664	5279.31
1.76	Unit1	Unit1A	0.983612	2.23421	0.97483	71.8134	0.0526935	0.103631	3.17064	4969.12
1.78	Unit1	Unit1A	1.0356	2.20077	0.930889	71.4193	0.0621184	0.102939	3.13815	4779.58
1.8	Unit1	Unit1A	1.02357	2.0632	0.954028	71.3274	0.123043	0.147117	3.22888	4792.65
1.82	Unit1	Unit1A	1.05075	2.16906	0.888071	71.2626	0.0817843	0.0871181	3.18182	4985.3
1.84	Unit1	Unit1A	1.03165	2.33701	0.943049	71.0725	0.0754439	0.0693031	3.39131	5216
1.86	Unit1	Unit1A	1.03972	2.39521	1.04411	70.6874	0.0853235	0.100277	3.26796	5396.71
1.88	Unit1	Unit1A	1.06628	2.16287	1.05112	70.7862	0.0543837	0.11055	3.35497	5412.12
1.9	Unit1	Unit1A	1.03274	2.23641	1.02831	70.288	0.0743995	0.0841423	3.2989	5097.24
1.92	Unit1	Unit1A	1.10425	2.05227	1.05631	70.1072	0.0852152	0.11362	3.28014	4923.65
1.94	Unit1	Unit1A	1.11389	1.95264	1.01182	70.0793	0.102957	0.189939	3.62755	4841.75
1.96	Unit1	Unit1A	1.00004	2.08781	1.0636	69.9971	0.143246	0.141455	3.43093	4698.67
1.98	Unit1	Unit1A	1.08496	1.95437	0.971798	70.2829	0.089815	0.158973	3.62266	4498.71
2	Unit1	Unit1A	1.02898	2.2139	0.991983	70.6616	0.0828121	0.088098	3.63225	4462.79
2.02	Unit1	Unit1A	1.10017	2.07731	0.940238	70.8324	0.0588747	0.14499	3.2546	4521.29
2.04	Unit1	Unit1A	1.16768	2.13988	0.9494	70.8763	0.0885406	0.165685	3.54468	4545.6
2.06	Unit1	Unit1A	1.10341	2.2155	0.932249	71.1263	0.0590801	0.109472	3.40925	4630.64
2.08	Unit1	Unit1A	1.14015	2.28376	0.956756	71.1217	0.0743951	0.0787204	3.38568	4752.29
2.1	Unit1	Unit1A	1.15445	2.29169	0.932505	71.2489	0.0559159	0.116993	3.47143	4713.29
2.12	Unit1	Unit1A	1.16317	2.31413	0.970612	71.3068	0.146376	0.0714454	3.47219	4793.32
2.14	Unit1	Unit1A	1.21357	2.13641	1.03808	71.2558	0.0995303	0.107388	3.339	4910.96
2.16	Unit1	Unit1A	1.18692	2.11106	1.09433	70.5854	0.105817	0.182535	3.43962	4862.31
2.18	Unit1	Unit1A	1.12624	2.12313	1.01625	70.973	0.0712696	0.13814	3.46527	4677.95
2.2	Unit1	Unit1A	1.19002	2.23501	0.997539	71.2814	0.0940411	0.103709	3.43395	4719.54
2.22	Unit1	Unit1A	1.12302	2.07347	1.05451	71.0183	0.0476959	0.125744	3.5181	4676.46
2.24	Unit1	Unit1A	1.12944	2.14966	1.03236	71.3506	0.10835	0.0970815	3.32702	4625.1
2.26	Unit1	Unit1A	1.17304	2.27861	1.00176	71.6204	0.0726662	0.0674758	3.21711	4618.19
2.28	Unit1	Unit1A	1.25691	2.34503	0.974715	71.1377	0.0718484	0.115996	3.5722	4712.1
2.3	Unit1	Unit1A	1.25637	2.25745	0.986212	70.8473	0.0402179	0.173112	3.35192	4976.84
2.32	Unit1	Unit1A	1.26027	2.19932	1.02441	71.5734	0.0642459	0.0730467	3.28035	5194.96
2.34	Unit1	Unit1A	1.23782	2.14549	1.0054	70.9544	0.0827559	0.0906794	3.28062	5163.74
2.36	Unit1	Unit1A	1.17404	2.05971	1.05045	70.9303	0.0734333	0.12806	3.29948	4990.83
2.38	Unit1	Unit1A	1.15564	2.17505	1.02921	70.5482	0.0356129	0.136219	3.40417	4777.08
2.4	Unit1	Unit1A	1.18544	2.12629	0.957813	70.1801	0.0598075	0.135683	3.52569	4600.47
2.42	Unit1	Unit1A	1.17185	2.39198	1.00023	69.9322	0.124247	0.0867047	3.25307	4723.83
2.44	Unit1	Unit1A	1.22914	2.25327	0.936916	70.6958	0.0584448	0.115991	3.40645	4827.15
2.46	Unit1	Unit1A	1.16587	2.16171	0.952664	70.8821	0.0809629	0.0854609	3.29249	4984.51
2.48	Unit1	Unit1A	1.18331	2.25179	0.899818	70.5052	0.0897127	0.0897127	3.57395	5140.78
2.5	Unit1	Unit1A	1.17121	2.17946	0.963476	70.357	0.082379	0.147745	3.30466	5027.72
2.52	Unit1	Unit1A	1.11995	2.06561	0.98409	70.3531	0.0840186	0.156418	3.41128	4700.35
2.54	Unit1	Unit1A	1.13095	2.18412	1.08625	70.1787	0.109966	0.111754	3.48912	4525.47
2.56	Unit1	Unit1A	1.15662	2.25969	1.08701	70.0378	0.0526546	0.0865677	3.48892	4602.82
2.58	Unit1	Unit1A	1.13995	2.17979	1.13093	70.3514	0.090186	0.0811674	3.55988	4829.47
2.6	Unit1	Unit1A	1.18555	2.08991	1.12931	69.8396	0.0825442	0.113385	3.44995	4816.29
2.62	Unit1	Unit1A	1.13948	2.01825	1.18506	70.0736	0.0902469	0.0993628	3.48135	4738.63
2.64	Unit1	Unit1A	1.11675	2.04357	1.13593	69.897	0.07305	0.105923	3.4974	4690.84
2.66	Unit1	Unit1A	1.12462	2.02798	1.05513	69.8921	0.0969187	0.0850325	3.57183	4616.83
2.68	Unit1	Unit1A	1.05597	1.90992	1.10463	70.0436	0.099169	0.105597	3.64302	4544.88
2.7	Unit1	Unit1A	1.01289	1.98449	1.0395	70.55	0.0743153	0.0972522	3.55024	4641.88
2.72	Unit1	Unit1A	1.08736	1.96196	1.05114	70.548	0.0950648	0.121321	3.69037	4753.66
2.74	Unit1	Unit1A	1.03818	1.91425	1.06276	70.8227	0.0947108	0.131138	3.4479	4787.35
2.76	Unit1	Unit1A	0.936151	1.89775	1.18428	70.863	0.0954329	0.0917973	3.55668	4723.35
2.78	Unit1	Unit1A	0.982693	1.90122	1.19995	70.7136	0.062335	0.144837	3.39229	4646.59
2.8	Unit1	Unit1A	1.03295	2.00774	1.15572	70.5735	0.0969252	0.0729246	3.40687	4802.34
2.82	Unit1	Unit1A	1.02308	2.03238	1.08553	70.7927	0.0936751	0.173574	3.41018	4951.73
2.84	Unit1	Unit1A	1.08893	2.09199	0.999406	71.3954	0.0575526	0.0886128	3.33479	5152.9
2.86	Unit1	Unit1A	1.0627	2.15004	1.16122	71.4192	0.0839217	0.121322	3.31538	5273.5
2.88	Unit1	Unit1A	1.07533	2.10856	1.1943	71.5171	0.0878566	0.10616	3.25285	5273.28
2.9	Unit1	Unit1A	1.0924	2.0618	1.20348	71.4515	0.0422274	0.111076	3.18335	5259.46
2.92	Unit1	Unit1A	1.14754	2.0285	1.12837	71.8831	0.04382	0.121418	3.39614	5412.67
2.94	Unit1	Unit1A	1.09144	2.03668	1.14773	71.8442	0.0717334	0.128031	3.21111	5481.44
2.96	Unit1	Unit1A	1.15506	2.21333	1.10758	71.8932	0.0840045	0.141529	3.38264	5299.43
2.98	Unit1	Unit1A	1.18904	2.12805	1.11056	71.3754	0.097642	0.196197	3.40587	4926.33
3	Unit1	Unit1A	1.10938	2.19976	1.09852	71.4058	0.0696757	0.116729	3.1611	4768.35
3.02	Unit1	Unit1A	1.16549	2.29043	1.02939	70.8527	0.0910402	0.118983	3.2394	4893.25
3.04	Unit1	Unit1A	1.18776	2.25377	1.06962	71.2034	0.101009	0.0919905	3.17673	4853.94
3.06	Unit1	Unit1A	1.111	2.29679	1.01909	71.1401	0.081095	0.10272	3.27328	4855.28
3.08	Unit1	Unit1A	1.22059	2.25444	1.01671	71.184	0.0884094	0.112767	3.40613	4952.49
3.1	Unit1	Unit1A	1.16186	2.24475	1.08471	71.4427	0.0826011	0.124356	3.53409	4920.52
3.12	Unit1	Unit1A	1.0963	2.1449	1.0504	71.1659	0.11521	0.122411	3.35039	5007.28
3.14	Unit1	Unit1A	1.17796	2.17177	1.10845	71.3228	0.0893623	0.132689	3.46057	5082.07
3.16	Unit1	Unit1A	1.13226	2.12904	1.11212	71.3128	0.0750565	0.129976	3.50585	5108.14
3.18	Unit1	Unit1A	1.0622	2.17973	1.05313	71.0757	0.0997796	0.209537	3.26462	5052.47
3.2	Unit1	Unit1A	1.0745	2.07572	1.14961	71.3851	0.105343	0.175877	3.34711	4873.78
3.22	Unit1	Unit1A	1.02545	2.19503	1.24027	70.8248	0.0963939	0.165247	3.27369	4863.73
3.24	Unit1	Unit1A	1.10332	2.24515	1.22346	71.5789	0.0678681	0.166919	3.36431	4828.51
3.26	Unit1	Unit1A	1.1892	2.2123	1.23484	71.2619	0.146939	0.158804	3.37398	4831.11
3.28	Unit1	Unit1A	1.14787	2.27293	1.38967	71.3132	0.101283	0.123182	3.31255	4872.19
3.3	Unit1	Unit1A	1.16726	2.29762	1.26877	71.5492	0.103347	0.136565	3.34943	4830.3
3.32	Unit1	Unit1A	1.16615	2.28924	1.30722	71.1917	0.0998507	0.14657	3.40388	4769.34
3.34	Unit1	Unit1A	1.12458	2.22615	1.21292	71.6435	0.124237	0.150005	3.4015	4879.8
3.36	Unit1	Unit1A	1.23372	2.20785	1.31745	71.1211	0.0855973	0.122814	3.13465	5075.84
3.38	Unit1	Unit1A	1.2523	2.21939	1.23279	71.8149	0.0808235	0.151428	3.21708	5340.23
3.4	Unit1	Unit1A	1.25168	2.27324	1.21707	71.839	0.0851295	0.130968	3.20022	5801.24
3.42	Unit1	Unit1A	1.24533	2.21729	1.16157	72.1674	0.092042	0.132541	3.23597	5529.1
3.44	Unit1	Unit1A	1.36631	2.29149	1.09232	72.1423	0.13243	0.114164	3.09901	5460.56
3.46	Unit1	Unit1A	1.28805	2.23471	1.06845	72.2276	0.0627416	0.135633	3.14624	5491.62
3.48	Unit1	Unit1A	1.25222	2.36073	1.08288	72.1939	0.0768907	0.0787214	3.064	5491.91
3.5	Unit1	Unit1A	1.16186	2.32556	1.12888	71.9311	0.0797178	0.145691	3.16115	5367.42
3.52	Unit1	Unit1A	1.05582	2.2351	1.11202	71.7922	0.103187	0.132669	3.24551	5023
3.54	Unit1	Unit1A	1.07429	2.19873	0.989476	71.8195	0.0911959	0.102139	3.16856	4993.58
3.56	Unit1	Unit1A	1.08887	2.17683	0.971816	72.0115	0.0871096	0.14972	3.26135	5101.64
3.58	Unit1	Unit1A	1.15524	2.22362	1.08628	71.8309	0.0680607	0.0814938	3.305	5233.63
3.6	Unit1	Unit1A	1.03335	2.11841	1.14494	71.4073	0.0807447	0.101611	3.25271	5450.77
3.62	Unit1	Unit1A	1.07103	2.17699	1.17675	71.564	0.0671116	0.087337	3.27393	5597.52
3.64	Unit1	Unit1A	1.14866	2.13468	1.19094	71.2843	0.124056	0.124975	3.25979	5227.61
3.66	Unit1	Unit1A	1.20937	2.212	1.09319	71.2916	0.0402514	0.0823324	3.48976	4799.58
3.68	Unit1	Unit1A	1.10847	2.03732	0.979392	71.3485	0.0857532	0.0983905	3.41985	4633.99
3.7	Unit1	Unit1A	1.00242	1.97047	1.10556	71.5928	0.0569971	0.0832338	3.39775	4751.68
3.72	Unit1	Unit1A	1.0261	2.09361	1.09328	71.4018	0.0865052	0.115954	3.30514	4967.13
3.74	Unit1	Unit1A	0.972514	1.96637	1.2175	70.6492	0.115996	0.172603	3.46403	4948.46
3.76	Unit1	Unit1A	1.02668	2.03937	1.27006	71.0301	0.0578148	0.0643423	3.3917	4787.13
3.78	Unit1	Unit1A	1.01327	2.02746	1.20834	71.1829	0.102621	0.128507	3.4126	4641.7
3.8	Unit1	Unit1A	1.05444	1.88655	1.19097	71.866	0.051661	0.118082	3.30013	4757.22
3.82	Unit1	Unit1A	1.02199	2.00995	1.11766	71.3262	0.112226	0.116826	3.5314	4900.06
3.84	Unit1	Unit1A	1.01862	2.02043	1.2651	71.4022	0.0616212	0.0728251	3.36252	5256.42
3.86	Unit1	Unit1A	1.003	2.03138	1.20322	71.6463	0.0893017	0.138183	3.31635	5529.05
3.88	Unit1	Unit1A	1.06701	2.21865	1.10288	71.6801	0.0662282	0.0349538	3.15805	5519.44
3.9	Unit1	Unit1A	1.13852	2.20922	1.0924	71.839	0.0922392	0.0994737	3.30244	5229.76
3.92	Unit1	Unit1A	0.965467	2.09746	1.05646	71.8422	0.0828063	0.150143	3.34807	4973.92
3.94	Unit1	Unit1A	0.931429	2.04766	1.09023	71.747	0.0956502	0.154155	3.37464	4767.5
3.96	Unit1	Unit1A	0.909807	1.82806	1.17431	71.2726	0.0703459	0.162265	3.29974	4711.08
3.98	Unit1	Unit1A	0.919507	1.83042	1.24033	70.6321	0.0591998	0.101213	3.60943	4822.8
4	Unit1	Unit1A	0.920672	2.11253	1.18992	71.1783	0.100367	0.162131	3.41907	4973.79
4.02	Unit1	Unit1A	0.997852	2.22854	1.25634	71.049	0.0845799	0.145401	3.21439	5038.66
4.04	Unit1	Unit1A	1.02411	2.20379	1.24554	71.4643	0.0601294	0.125985	3.29716	5207.5
4.06	Unit1	Unit1A	1.00914	2.32274	1.23013	71.4177	0.0910505	0.0910505	3.25661	5362.89
4.08	Unit1	Unit1A	1.03606	2.42031	1.10608	71.8977	0.0662321	0.0690706	3.11526	5397.48
4.1	Unit1	Unit1A	1.04303	2.48731	1.11006	72.0006	0.111098	0.0817166	3.1345	5242.7
4.12	Unit1	Unit1A	1.10903	2.35623	1.04794	71.8747	0.0789481	0.139099	3.11704	5271.08
4.14	Unit1	Unit1A	1.12519	2.32724	1.17358	71.6747	0.0806421	0.0721035	3.1309	5314.28
4.16	Unit1	Unit1A	1.0689	2.2973	1.21254	71.7618	0.060627	0.124052	3.15722	5413.2
4.18	Unit1	Unit1A	1.0652	2.35436	1.2725	71.1193	0.0768127	0.112905	3.26304	5531.3
4.2	Unit1	Unit1A	1.11452	2.23187	1.33855	70.9556	0.08566	0.158141	3.11411	5457.72
4.22	Unit1	Unit1A	1.05169	2.15433	1.3658	71.8676	0.107485	0.0574489	3.3916	5337.86
4.24	Unit1	Unit1A	1.07379	2.2143	1.24286	71.7249	0.102353	0.135252	3.19655	5028.25
4.26	Unit1	Unit1A	1.06935	2.03396	1.23695	71.8644	0.101106	0.127521	3.24033	4771.84
4.28	Unit1	Unit1A	1.10687	2.07098	1.24693	71.7526	0.0713821	0.0885499	3.20041	4750.02
4.3	Unit1	Unit1A	1.02698	2.08995	1.4339	71.5048	0.0830442	0.0895032	3.27006	5004.71
4.32	Unit1	Unit1A	1.1214	2.16456	1.5368	70.9871	0.0810312	0.0856882	3.47263	5064.1
4.34	Unit1	Unit1A	1.03431	2.02651	1.40592	71.1447	0.102515	0.129975	3.50329	5138.88
4.36	Unit1	Unit1A	1.07197	2.05498	1.43693	71.5814	0.116458	0.0779445	3.28943	5046.88
4.38	Unit1	Unit1A	1.10069	2.08162	1.51573	70.765	0.0795349	0.137129	3.36812	4758.86
4.4	Unit1	Unit1A	1.02103	2.01639	1.51962	70.9521	0.109068	0.0806555	3.38484	4580.9
4.42	Unit1	Unit1A	1.08645	1.96822	1.46474	71.3722	0.0813238	0.0904614	3.34644	4774.28
4.44	Unit1	Unit1A	1.03151	1.96973	1.54228	71.3623	0.0525262	0.137655	3.43481	4940.71
4.46	Unit1	Unit1A	0.990352	1.96702	1.70165	71.288	0.0729541	0.134053	3.37808	4990.04
4.48	Unit1	Unit1A	0.986211	1.86193	2.01078	70.883	0.122363	0.12419	3.50691	4886.9
4.5	Unit1	Unit1A	1.01445	1.91894	1.83554	71.15	0.071479	0.133794	3.31886	4647.25
4.52	Unit1	Unit1A	1.02026	1.94033	1.5166	71.5532	0.0900768	0.143388	3.47856	4735.61
4.54	Unit1	Unit1A	0.989593	1.87795	1.43286	72.1154	0.0647568	0.0848223	3.27802	4872.73
4.56	Unit1	Unit1A	1.02373	2.08959	1.32225	72.0158	0.103472	0.119039	3.31769	4993.18
4.58	Unit1	Unit1A	1.03734	2.042	1.35589	71.6715	0.108907	0.143394	3.37452	5067.39
4.6	Unit1	Unit1A	1.05007	1.98387	1.31349	72.1178	0.0681273	0.120812	3.16201	5103.77
4.62	Unit1	Unit1A	1.11307	2.1969	1.31229	71.9082	0.0456926	0.0785912	3.32871	5126.88
4.64	Unit1	Unit1A	1.08401	2.0653	1.22432	71.7874	0.1073	0.132062	3.15867	5130.49
4.66	Unit1	Unit1A	1.03947	2.21948	1.28953	71.9443	0.0657084	0.104951	3.29332	5143.35
4.68	Unit1	Unit1A	1.12256	2.25515	1.34963	71.5466	0.0893671	0.0756885	3.33419	5167.67
4.7	Unit1	Unit1A	1.13895	2.25459	1.47346	71.5441	0.0914749	0.0914749	3.21252	5145.92
4.72	Unit1	Unit1A	1.09651	2.21995	1.57837	71.6826	0.0493521	0.128316	3.37762	5140.07
4.74	Unit1	Unit1A	1.08284	2.17546	1.75282	71.4637	0.0952042	0.118338	3.24559	5039.78
4.76	Unit1	Unit1A	1.08944	2.26427	1.75461	71.6503	0.0647191	0.10427	3.40039	4913.85
4.78	Unit1	Unit1A	1.13299	2.32932	1.844	71.2694	0.137386	0.107054	3.29917	4826.19
4.8	Unit1	Unit1A	1.12124	2.27908	1.94788	71.537	0.0955195	0.101768	3.41085	4808.16
4.82	Unit1	Unit1A	1.10413	2.26076	1.82925	71.6645	0.0969785	0.150361	3.28311	4694.81
4.84	Unit1	Unit1A	1.135	2.2311	1.73874	72.2942	0.0892794	0.0795559	3.34955	4748.31
4.86	Unit1	Unit1A	1.2182	2.1607	1.91054	71.3463	0.0537312	0.13653	3.19739	4838.98
4.88	Unit1	Unit1A	1.17049	2.24992	2.15798	71.3866	0.0742607	0.147637	3.31535	4900.42
4.9	Unit1	Unit1A	1.05786	2.06624	2.31092	70.9737	0.102547	0.0854562	3.29248	5063.06
4.92	Unit1	Unit1A	1.13579	2.11224	2.26178	71.041	0.0810005	0.137968	3.36343	5120.01
4.94	Unit1	Unit1A	1.14386	2.07397	1.96356	71.604	0.0927455	0.12896	3.24704	4918.93
4.96	Unit1	Unit1A	1.17076	2.11106	1.90435	71.9308	0.102914	0.120506	3.49165	4766.86
4.98	Unit1	Unit1A	1.08201	2.07923	2.37248	70.8996	0.070662	0.104226	3.47535	4810.83
5	Unit1	Unit1A	1.0903	2.21467	2.50787	70.6238	0.0797999	0.136287	3.56735	4793.59
5.02	Unit1	Unit1A	1.16525	2.12554	1.96387	71.6189	0.0697911	0.0724414	3.34101	4767.59
5.04	Unit1	Unit1A	1.20952	2.14059	1.77168	71.373	0.101013	0.0579725	3.4174	4742.78
5.06	Unit1	Unit1A	1.13822	2.08972	1.75647	71.7035	0.117932	0.125079	3.34265	4709.36
5.08	Unit1	Unit1A	1.1008	2.13297	1.83526	71.594	0.0855684	0.123896	3.42903	4723.2
5.1	Unit1	Unit1A	1.10375	2.05779	1.89568	71.4646	0.110729	0.069095	3.36921	4998.02
5.12	Unit1	Unit1A	1.12737	2.13133	1.73045	71.582	0.0673972	0.141797	3.48352	5133.36
5.14	Unit1	Unit1A	1.18175	2.24549	1.84604	71.8907	0.0454518	0.0978961	3.29948	5095.21
5.16	Unit1	Unit1A	1.11648	2.13051	1.85555	72.0643	0.0893186	0.102454	3.24094	4917.39
5.18	Unit1	Unit1A	1.15239	2.13533	2.06012	72.2364	0.0527349	0.108063	3.49502	4728.54
5.2	Unit1	Unit1A	1.10829	2.18432	1.98289	72.7671	0.0967902	0.142133	3.15116	4860.72
5.22	Unit1	Unit1A	1.08755	2.10828	1.56407	72.8482	0.00967101	0.10726	3.33435	4815.83
5.24	Unit1	Unit1A	1.17902	2.24014	1.57989	73.0808	0.0786012	0.129255	3.31528	4794.95
5.26	Unit1	Unit1A	1.20949	2.27189	1.66198	72.9972	0.0757009	0.132477	3.11371	4894.61
5.28	Unit1	Unit1A	1.12122	2.23468	1.72927	72.65	0.0914227	0.123334	2.99481	5066.27
5.3	Unit1	Unit1A	1.16271	2.1629	1.69349	72.8306	0.0432234	0.116703	3.18396	4954.72
5.32	Unit1	Unit1A	1.12601	2.13206	1.65311	72.7526	0.02977	0.110324	3.20535	4863.76
5.34	Unit1	Unit1A	1.09527	2.1914	1.7398	72.3492	0.0579645	0.107278	3.26425	4983.11
5.36	Unit1	Unit1A	1.05709	2.08457	1.76065	72.467	0.0862039	0.119292	3.27002	5175.16
5.38	Unit1	Unit1A	1.06867	1.93746	1.76475	72.3014	0.0473406	0.0797777	3.2556	5257.58
5.4	Unit1	Unit1A	1.08513	2.05791	1.75223	72.1193	0.0696712	0.106249	3.34258	4990.52
5.42	Unit1	Unit1A	1.04061	2.10049	1.74661	72.8312	0.0928489	0.122631	3.33508	4943.12
5.44	Unit1	Unit1A	1.10057	2.03806	1.58196	73.1695	0.0654062	0.073255	3.42791	4990.26
5.46	Unit1	Unit1A	1.11199	2.13397	1.4988	73.1367	0.0804784	0.106439	3.26756	4975.86
5.48	Unit1	Unit1A	1.14639	2.19978	1.37323	73.5583	0.045195	0.117333	3.26762	4857.44
5.5	Unit1	Unit1A	1.17329	2.20586	1.34216	73.242	0.0756396	0.106423	3.18486	4855.75
5.52	Unit1	Unit1A	1.07729	2.25991	1.35309	73.0105	0.0838986	0.11603	3.24569	4985.48
5.54	Unit1	Unit1A	1.1477	2.16078	1.32514	73.0156	0.0917808	0.0961513	3.03005	5123.51
5.56	Unit1	Unit1A	1.13257	2.27213	1.26356	73.0811	0.0707312	0.10566	3.23451	5274.11
5.58	Unit1	Unit1A	1.09198	2.18222	1.11384	73.4025	0.148629	0.197589	3.19404	5404.93
5.6	Unit1	Unit1A	1.08178	2.16706	1.1693	72.9248	0.0848971	0.126908	3.36773	5363.79
5.62	Unit1	Unit1A	1.12799	2.13288	1.1568	72.9719	0.0619871	0.110878	3.32561	5176.3
5.64	Unit1	Unit1A	0.999275	2.09229	1.25307	72.9594	0.113192	0.104349	3.41112	5019.35
5.66	Unit1	Unit1A	1.02549	1.97468	1.3617	72.0812	0.111774	0.14992	3.28562	4948.91
5.68	Unit1	Unit1A	1.10999	2.17049	1.28056	71.8119	0.0486063	0.0989802	3.33779	4979.06
5.7	Unit1	Unit1A	0.98189	2.03615	1.26422	72.0934	0.0848768	0.124188	3.29058	5061.87
5.72	Unit1	Unit1A	0.9488	1.97154	1.35505	71.7872	0.0694896	0.138088	3.43144	5097.48
5.74	Unit1	Unit1A	1.01197	2.07328	1.36006	72.1727	0.0547252	0.14085	3.26034	5058.68
5.76	Unit1	Unit1A	1.01191	2.06916	1.38982	71.6515	0.0533518	0.067579	3.45985	5043.09
5.78	Unit1	Unit1A	0.965289	2.11487	1.44033	71.783	0.02326	0.0751476	3.38917	5074.48
5.8	Unit1	Unit1A	1.0017	2.1015	1.4841	71.0623	0.0747001	0.1089	3.35966	4968.82
5.82	Unit1	Unit1A	1.02908	1.88061	1.51916	71.463	0.0760938	0.146752	3.50249	5070.53
5.84	Unit1	Unit1A	0.971665	1.98951	1.47516	70.9098	0.115912	0.138551	3.32231	5104.53
5.86	Unit1	Unit1A	1.04615	2.02207	1.59157	70.7671	0.102152	0.137723	3.34711	5090.41
5.88	Unit1	Unit1A	1.01734	1.90924	1.58827	70.7434	0.0866999	0.120826	3.42152	5050.72
5.9	Unit1	Unit1A	0.99295	1.99882	1.60847	70.8003	0.0747481	0.0968956	3.57503	4940.38
5.92	Unit1	Unit1A	1.01741	1.98633	1.64779	70.9216	0.0781243	0.133799	3.44252	4819.44
5.94	Unit1	Unit1A	0.917668	2.00089	1.75701	71.2888	0.070316	0.142412	3.42497	4778.82
5.96	Unit1	Unit1A	0.917044	1.91574	1.65911	71.1526	0.0906277	0.123828	3.51741	4731.04
5.98	Unit1	Unit1A	0.928503	1.75374	1.85252	71.1796	0.0781236	0.157145	3.38352	4682.37
6	Unit1	Unit1A	0.866089	1.87263	1.84021	70.8843	0.100834	0.112538	3.46155	4927.78
6.02	Unit1	Unit1A	0.876824	1.75822	1.7125	70.5985	0.0832023	0.101488	3.5166	4809.19
6.04	Unit1	Unit1A	0.993818	1.84996	1.48799	71.3954	0.0702055	0.104852	3.40901	4714.03
6.06	Unit1	Unit1A	0.913568	2.04571	1.24634	71.8766	0.0909999	0.0865391	3.54598	4714.78
6.08	Unit1	Unit1A	0.964486	2.15575	1.12942	72.1984	0.100393	0.0869472	3.30053	4819.22
6.1	Unit1	Unit1A	1.11132	2.16115	1.09528	72.7099	0.0953578	0.0909018	3.37204	4962.77
6.12	Unit1	Unit1A	1.14705	2.31093	1.05501	72.4388	0.0911625	0.115945	3.16976	5128.93
6.14	Unit1	Unit1A	1.07697	2.32366	1.06986	73.1824	0.0524267	0.0888589	3.09874	5111.32
6.16	Unit1	Unit1A	1.11959	2.29907	1.10725	73.0718	0.0572566	0.0775166	3.21617	4992.44
6.18	Unit1	Unit1A	1.05486	2.21424	1.19627	73.2306	0.0816836	0.0860751	3.24718	4873.41
6.2	Unit1	Unit1A	0.959879	2.17063	1.29437	72.9544	0.0720576	0.0907393	3.16299	4824.27
6.22	Unit1	Unit1A	0.984528	2.08483	1.39826	72.8838	0.0870549	0.116671	3.09652	4886.6
6.24	Unit1	Unit1A	1.09092	2.11488	1.3873	72.7396	0.0785602	0.114269	3.08207	4896.71
6.26	Unit1	Unit1A	1.0242	2.07678	1.52344	72.4654	0.101977	0.114391	3.0299	4919.14
6.28	Unit1	Unit1A	0.947317	2.00889	1.81996	72.0942	0.0557775	0.135845	3.04571	5005.99
6.3	Unit1	Unit1A	0.971703	1.97666	2.15465	71.6094	0.0269668	0.108766	3.1005	5120.84
6.32	Unit1	Unit1A	1.01068	1.96817	2.22242	70.8588	0.118108	0.105486	3.08603	5280.28
6.34	Unit1	Unit1A	0.878929	1.81216	2.00359	71.2899	0.085592	0.05338	3.23261	5333.55
6.36	Unit1	Unit1A	0.87078	1.8803	1.76529	71.0388	0.0474639	0.0912767	3.10247	5362.1
6.38	Unit1	Unit1A	0.866542	1.7684	1.54565	71.0546	0.0724382	0.0697217	3.27528	5425.43
6.4	Unit1	Unit1A	0.89647	1.64154	1.59566	70.3183	0.0449611	0.12479	3.30861	5458.55
6.42	Unit1	Unit1A	0.92221	1.73054	1.79121	69.0238	0.0644053	0.0737394	3.40883	5445.5
6.44	Unit1	Unit1A	0.864166	1.71035	2.18266	69.0064	0.0937047	0.126833	3.57551	5400.19
6.46	Unit1	Unit1A	0.848623	1.71398	2.20568	69.2953	0.0613463	0.0920194	3.60359	5287.16
6.48	Unit1	Unit1A	0.879532	1.7461	1.94793	69.6848	0.088879	0.137022	3.43416	5103.86
6.5	Unit1	Unit1A	0.909875	1.83718	1.81883	70.3419	0.0843835	0.127493	3.50453	4943.25
6.52	Unit1	Unit1A	0.921344	1.93291	1.71784	70.681	0.0801961	0.0619697	3.51861	4795.06
6.54	Unit1	Unit1A	0.93571	2.1645	1.41253	71.5137	0.0932125	0.12996	3.43594	4668.64
6.56	Unit1	Unit1A	0.995567	2.13032	1.32181	72.1135	0.0806738	0.144504	3.4628	4628.27
6.58	Unit1	Unit1A	1.03241	2.16666	1.32212	71.9598	0.0834006	0.100081	3.34074	4711.57
6.6	Unit1	Unit1A	1.04462	2.13748	1.33318	72.5049	0.0640278	0.110514	3.24894	4883.79
6.62	Unit1	Unit1A	1.05966	2.25135	1.22316	72.5344	0.103168	0.147758	3.18907	4819.04
6.64	Unit1	Unit1A	1.06769	2.14581	1.14594	72.5427	0.0599922	0.071295	3.35308	4819.68
6.66	Unit1	Unit1A	1.09329	2.02115	1.10117	72.7351	0.0560214	0.0490187	3.26716	4869.77
6.68	Unit1	Unit1A	0.957581	2.10633	1.19565	72.5364	0.0654908	0.114166	3.2323	4908.31
6.7	Unit1	Unit1A	1.05073	2.0691	1.2887	71.9652	0.0944874	0.0962371	3.25584	4847.22
6.72	Unit1	Unit1A	1.11434	2.01592	1.40731	71.6672	0.0793464	0.0871938	3.39393	4903.6
6.74	Unit1	Unit1A	1.00895	2.06752	1.70189	71.8147	0.0870534	0.0940177	3.359	4972
6.76	Unit1	Unit1A	0.882646	1.99853	1.94477	71.862	0.0546235	0.142194	3.32354	5074.49
6.78	Unit1	Unit1A	1.03012	1.97271	2.13637	71.6828	0.0953973	0.117277	3.38684	5234.28
6.8	Unit1	Unit1A	0.993377	1.95822	2.02134	71.9978	0.0484153	0.0484153	3.34449	5444.64
6.82	Unit1	Unit1A	1.02506	1.99105	2.01798	72.1053	0.088607	0.0938192	3.36303	5415.89
6.84	Unit1	Unit1A	1.0985	2.10102	1.93051	72.3611	0.0916842	0.0694058	3.47718	5416.92
6.86	Unit1	Unit1A	0.997517	2.1411	1.87733	72.64	0.0859188	0.129737	3.22475	5402.08
6.88	Unit1	Unit1A	1.09193	2.22639	1.96078	72.6419	0.0972146	0.128462	3.34199	5343.04
6.9	Unit1	Unit1A	1.10459	2.30742	1.82646	72.4775	0.0657799	0.0760313	3.43755	5367.18
6.92	Unit1	Unit1A	1.15312	2.27351	1.63279	73.0081	0.110231	0.111092	3.18172	5200.81
6.94	Unit1	Unit1A	1.06789	2.18917	1.84469	72.5656	0.105066	0.109372	3.23534	4895.81
6.96	Unit1	Unit1A	1.15273	2.1478	2.2486	72.0682	0.087015	0.101661	3.33913	4717.81
6.98	Unit1	Unit1A	1.06768	2.19914	2.67531	71.9162	0.0952348	0.124941	3.27589	4798.46
7	Unit1	Unit1A	1.05181	2.13981	2.63748	71.7113	0.0970634	0.0511789	3.26727	4822.84
7.02	Unit1	Unit1A	1.06975	2.19535	2.32623	71.498	0.110814	0.0654416	3.22007	4860.66
7.04	Unit1	Unit1A	1.12796	2.11939	1.93415	72.0688	0.0782704	0.0530499	3.37371	4916.12
7.06	Unit1	Unit1A	1.14552	2.11481	1.90106	72.3512	0.0628163	0.068051	3.33326	4975.31
7.08	Unit1	Unit1A	1.05196	2.12571	2.07691	72.1513	0.0714672	0.0827973	3.20984	4986.48
7.1	Unit1	Unit1A	1.05154	2.11874	1.95522	72.145	0.07306	0.0982831	3.31732	4780.47
7.12	Unit1	Unit1A	1.0503	2.21721	1.72229	72.1704	0.130424	0.100193	3.3453	4671.21
7.14	Unit1	Unit1A	1.07599	2.12829	1.51094	71.8613	0.057877	0.069277	3.35085	4742.06
7.16	Unit1	Unit1A	1.11618	2.16467	1.64824	72.2334	0.0677001	0.070304	3.22526	4895.2
7.18	Unit1	Unit1A	1.05223	2.02022	1.93509	72.2909	0.0570436	0.129006	3.38088	5032.7
7.2	Unit1	Unit1A	0.973966	1.94793	2.20359	71.7992	0.0796157	0.0840388	3.46413	5131.43
7.22	Unit1	Unit1A	1.03982	2.06024	1.9544	71.7661	0.0626185	0.0917229	3.48091	5286.74
7.24	Unit1	Unit1A	1.10611	2.09879	1.74533	72.1433	0.04748	0.129251	3.45278	5362.89
7.26	Unit1	Unit1A	1.09075	2.32133	1.50153	72.0741	0.0524398	0.10488	3.27907	5360.15
7.28	Unit1	Unit1A	1.11609	2.20956	1.53886	71.7307	0.103519	0.109608	3.38193	5312.22
7.3	Unit1	Unit1A	1.02741	2.09281	1.60517	71.6176	0.078624	0.0627225	3.38722	5292.6
7.32	Unit1	Unit1A	1.01948	1.94742	1.64966	71.3958	0.12088	0.100437	3.39054	5016.32
7.34	Unit1	Unit1A	1.0373	2.13055	1.77353	71.0364	0.0657194	0.147425	3.59799	4884.38
7.36	Unit1	Unit1A	1.06492	1.96838	1.43636	71.5931	0.06176	0.110286	3.4216	4853.69
7.38	Unit1	Unit1A	1.08218	2.17047	1.24477	71.2734	0.0201051	0.137239	3.47108	4848.55
7.4	Unit1	Unit1A	1.07842	2.18926	1.21246	71.4607	0.0657042	0.166451	3.32885	4884.8
7.42	Unit1	Unit1A	1.11329	2.14262	1.15527	71.4752	0.079583	0.133804	3.35638	5034.6
7.44	Unit1	Unit1A	0.940433	1.96684	1.15712	71.172	0.0842179	0.121941	3.53382	5149.54
7.46	Unit1	Unit1A	0.966617	1.87721	1.16314	71.3625	0.0800327	0.0640262	3.81877	5216.71
7.48	Unit1	Unit1A	0.970961	1.81955	1.00848	71.3785	0.097364	0.103617	3.63079	5267.15
7.5	Unit1	Unit1A	0.978375	1.79443	0.954425	71.3646	0.0798311	0.146357	3.63141	5412.26
7.52	Unit1	Unit1A	0.964075	1.92636	1.01237	71.499	0.081383	0.114473	3.70941	5316.49
7.54	Unit1	Unit1A	0.936331	1.7834	1.13984	71.1701	0.0633742	0.140137	3.61789	5172.01
7.56	Unit1	Unit1A	1.03909	1.89111	1.11534	71.3878	0.0656081	0.0620617	3.65007	4965.27
7.58	Unit1	Unit1A	1.06508	1.9409	1.00874	72.0449	0.107388	0.0624961	3.64519	4739.87
7.6	Unit1	Unit1A	1.04114	1.87246	0.994219	72.099	0.0690553	0.0734819	3.59974	4816.52
7.62	Unit1	Unit1A	0.976481	2.00073	1.03044	72.2145	0.125598	0.142404	3.55894	4806.49
7.64	Unit1	Unit1A	0.978585	1.80559	1.23209	72.2335	0.0904127	0.157779	3.5508	4847.1
7.66	Unit1	Unit1A	0.989709	1.88833	1.36808	72.1034	0.0472958	0.119115	3.43301	4976.07
7.68	Unit1	Unit1A	0.998383	2.04922	1.1811	72.6267	0.0891725	0.13201	3.50132	5151.44
7.7	Unit1	Unit1A	1.03478	2.05552	1.0655	73.3221	0.0877678	0.116731	3.34065	5119.28
7.72	Unit1	Unit1A	1.05918	2.17253	1.04887	72.61	0.0988686	0.131538	3.12986	5030.81
7.74	Unit1	Unit1A	1.14158	2.14692	1.06743	72.7332	0.0715641	0.112951	3.28485	4950.16
7.76	Unit1	Unit1A	1.08248	2.35025	1.1497	72.8036	0.0525726	0.0792898	3.38592	4845.84
7.78	Unit1	Unit1A	1.05832	2.253	1.06261	72.2281	0.0506003	0.13036	3.50589	4717.19
7.8	Unit1	Unit1A	1.09635	2.24137	0.956317	72.1174	0.0563544	0.0956317	3.34909	4712.33
7.82	Unit1	Unit1A	1.1173	2.18176	0.89817	72.3005	0.0684237	0.0753527	3.39259	5022.61
7.84	Unit1	Unit1A	1.14295	2.20666	0.936238	72.0326	0.0654591	0.0602913	3.4403	5192.57
7.86	Unit1	Unit1A	1.0964	2.11959	0.874121	71.7512	0.107611	0.164063	3.45241	5267.55
7.88	Unit1	Unit1A	1.02085	1.99793	0.965472	70.9055	0.0723434	0.0982441	3.35693	5314.67
7.9	Unit1	Unit1A	1.03847	2.03222	0.966019	71.0454	0.0742404	0.0688736	3.49009	5212.36
7.92	Unit1	Unit1A	1.05931	1.95447	0.896958	70.3905	0.0914897	0.0941805	3.49951	4730.65
7.94	Unit1	Unit1A	1.0581	1.9433	0.913119	70.1634	0.0882501	0.144982	3.53708	4587.83
7.96	Unit1	Unit1A	1.0506	1.95897	0.945273	70.2626	0.0756219	0.109832	3.64054	4593.47
7.98	Unit1	Unit1A	0.918811	1.87996	1.09086	70.0558	0.0657581	0.120707	3.5733	4539.32
8	Unit1	Unit1A	0.938176	1.91891	1.1039	70.2944	0.0787851	0.124064	3.65538	4637.11
8.02	Unit1	Unit1A	1.04036	1.98705	1.03496	69.9015	0.0963799	0.165737	3.70095	4690.9
8.04	Unit1	Unit1A	0.953634	1.77567	0.974365	70.4382	0.101853	0.131598	3.48397	4629.23
8.06	Unit1	Unit1A	1.00401	1.853	1.04186	70.3943	0.0793114	0.054076	3.70991	4517.24
8.08	Unit1	Unit1A	0.993102	1.94909	0.988575	70.5102	0.107729	0.09415	3.6675	4470.65
8.1	Unit1	Unit1A	0.932579	1.82706	0.899013	70.6945	0.104325	0.14152	3.67228	4717.46
8.12	Unit1	Unit1A	0.934748	1.92719	1.00235	70.8678	0.11628	0.0928438	3.56932	4748.89
8.14	Unit1	Unit1A	0.851013	1.834	0.972977	70.8344	0.10194	0.0891971	3.38021	4718.97
8.16	Unit1	Unit1A	1.01517	1.8551	1.06784	70.817	0.00998829	0.136204	3.60911	4703.44
8.18	Unit1	Unit1A	0.938771	1.98266	1.01761	71.4989	0.0779289	0.0915212	3.66819	4721.79
8.2	Unit1	Unit1A	0.976477	2.07267	0.931807	71.3865	0.0562837	0.146516	3.45737	4632.17
8.22	Unit1	Unit1A	1.00649	1.95623	0.912493	72.0896	0.0736024	0.0620743	3.48752	4634.98
8.24	Unit1	Unit1A	1.02196	1.8852	0.960233	71.6762	0.061723	0.111101	3.51488	4675.39
8.26	Unit1	Unit1A	0.960147	2.01737	0.934555	71.8707	0.0414769	0.112958	3.54745	4794.12
8.28	Unit1	Unit1A	1.0717	1.93856	0.978513	71.6178	0.0694542	0.0641792	3.54859	4975.58
8.3	Unit1	Unit1A	1.04665	2.05424	1.02446	71.7209	0.0816725	0.115407	3.60718	4952.8
8.32	Unit1	Unit1A	0.981243	2.09129	1.20307	71.3856	0.0474074	0.122544	3.47722	4996.52
8.34	Unit1	Unit1A	1.01938	2.03166	1.28311	71.7121	0.0737011	0.0328547	3.47141	4950.29
8.36	Unit1	Unit1A	1.0082	1.87529	1.18481	71.781	0.0994	0.1278	3.37562	4875.57
8.38	Unit1	Unit1A	0.995292	2.02497	1.13546	72.0348	0.0855123	0.094328	3.58696	4844.01
8.4	Unit1	Unit1A	1.09717	1.94701	1.28485	71.5649	0.0789328	0.126293	3.66623	4835.42
8.42	Unit1	Unit1A	1.10306	2.01397	1.32402	71.8821	0.0812227	0.113537	3.44468	5004.57
8.44	Unit1	Unit1A	1.03237	1.95695	1.25497	72.5746	0.0762449	0.0999071	3.33256	5125.71
8.46	Unit1	Unit1A	1.07395	2.0876	1.33734	72.9215	0.0691729	0.078928	3.25148	5232.64
8.48	Unit1	Unit1A	1.07369	2.10177	1.23071	73.427	0.120176	0.061404	3.18711	5301.42
8.5	Unit1	Unit1A	1.1336	2.12355	1.21754	73.1354	0.0891304	0.115091	3.33319	4915.36
8.52	Unit1	Unit1A	1.06014	2.17281	1.25649	73.5827	0.0585616	0.130041	3.1907	4664.99
8.54	Unit1	Unit1A	1.09833	2.32193	1.26737	73.3999	0.10211	0.0986777	3.23209	4701.35
8.56	Unit1	Unit1A	1.08678	2.21913	1.29141	73.5699	0.0937175	0.130689	3.02001	4823.79
8.58	Unit1	Unit1A	0.952118	2.26387	1.26518	73.8262	0.0595074	0.101766	3.0862	4841.69
8.6	Unit1	Unit1A	1.14443	2.28541	1.34599	73.4505	0.0735275	0.134945	3.1136	4838.1
8.62	Unit1	Unit1A	1.06546	2.12573	1.36233	73.4146	0.0527969	0.119442	3.12033	4846.73
8.64	Unit1	Unit1A	1.0661	2.13479	1.43327	73.2317	0.0915775	0.0751626	3.15824	4937.15
8.66	Unit1	Unit1A	1.00235	2.13022	1.58143	73.0282	0.109064	0.146285	3.1297	4937.25
8.68	Unit1	Unit1A	0.999294	2.08143	1.70647	73.2719	0.0863264	0.106382	3.05598	4740
8.7	Unit1	Unit1A	1.09024	2.11289	1.5019	73.153	0.104864	0.164663	3.02016	4631.39
8.72	Unit1	Unit1A	1.06316	2.16903	1.40041	72.7604	0.0662298	0.0827872	3.21198	4753.41
8.74	Unit1	Unit1A	1.08346	2.15373	1.32375	72.7805	0.11794	0.0888951	3.06934	4757.74
8.76	Unit1	Unit1A	0.964037	2.1634	1.21686	72.8749	0.0507388	0.0472395	3.38736	4720.72
8.78	Unit1	Unit1A	1.09738	2.07897	1.29913	72.6664	0.0421056	0.113159	3.26687	4739.05
8.8	Unit1	Unit1A	1.05618	2.16341	1.30966	72.4548	0.0607303	0.0431273	3.21681	4698.18
8.82	Unit1	Unit1A	1.00649	2.1167	1.24734	72.0082	0.0835077	0.0993302	3.477	4853.61
8.84	Unit1	Unit1A	1.01469	2.10173	1.22028	71.8798	0.090881	0.122645	3.50973	4858.2
8.86	Unit1	Unit1A	1.05912	1.92698	1.24682	71.5806	0.0938464	0.155517	3.56661	4751.2
8.88	Unit1	Unit1A	1.07537	2.01553	1.27772	71.5624	0.0787944	0.143263	3.31068	4684.93
8.9	Unit1	Unit1A	1.03834	2.16732	1.32283	71.1087	0.061026	0.103206	3.40996	4994.18
8.92	Unit1	Unit1A	0.998757	2.00824	1.40202	71.0396	0.0956732	0.108191	3.45637	5028.46
8.94	Unit1	Unit1A	0.981857	1.96553	1.40848	71.0723	0.0443829	0.112316	3.45688	4907.77
8.96	Unit1	Unit1A	1.02021	1.97672	1.28869	70.7942	0.0782679	0.131053	3.33279	4854.1
8.98	Unit1	Unit1A	1.02302	1.84034	1.19855	70.7301	0.0329122	0.080452	3.50084	4988.2
9	Unit1	Unit1A	0.988316	1.88978	1.16934	70.6431	0.0585127	0.106054	3.62505	4948.6
9.02	Unit1	Unit1A	0.91292	1.80478	1.18213	70.0128	0.0869884	0.113543	3.56278	4955.02
9.04	Unit1	Unit1A	0.889548	1.7513	1.23888	69.5867	0.0657895	0.11768	3.54151	4996.04
9.06	Unit1	Unit1A	0.928923	1.75745	1.17101	69.9629	0.0938306	0.0994605	3.42042	4939.42
9.08	Unit1	Unit1A	0.908929	1.74571	1.1638	69.8489	0.0871447	0.135871	3.47042	4754.28
9.1	Unit1	Unit1A	0.910998	1.73714	1.15343	70.2681	0.0801902	0.16784	3.34781	4914.86
9.12	Unit1	Unit1A	0.899371	1.71003	1.11265	70.1849	0.0915414	0.127403	3.36836	4859.97
9.14	Unit1	Unit1A	0.857923	1.75233	1.09369	70.2159	0.0785884	0.109462	3.473	4808.77
9.16	Unit1	Unit1A	0.893284	1.62988	1.10729	69.486	0.0773861	0.160504	3.64263	4849.18
9.18	Unit1	Unit1A	0.83431	1.59147	1.09527	69.3544	0.0838119	0.119051	3.48327	4989.48
9.2	Unit1	Unit1A	0.914137	1.7378	1.19121	69.7383	0.0518325	0.154555	3.49658	5015.54
9.22	Unit1	Unit1A	0.878038	1.80989	1.1575	70.1486	0.0651447	0.123681	3.44934	4930.55
9.24	Unit1	Unit1A	0.894052	1.75534	1.21516	70.0572	0.0411919	0.136682	3.4659	4853.13
9.26	Unit1	Unit1A	0.973103	1.86102	1.15458	70.1125	0.103699	0.108328	3.54237	4795.69
9.28	Unit1	Unit1A	0.858548	1.71063	1.21712	70.3861	0.108127	0.0693122	3.5745	4789.7
9.3	Unit1	Unit1A	0.928434	1.81951	1.21799	70.0473	0.0616465	0.0859315	3.41192	5046.97
9.32	Unit1	Unit1A	0.899102	1.84093	1.12573	69.947	0.037153	0.106815	3.5672	5255.95
9.34	Unit1	Unit1A	0.886455	1.75232	1.11111	70.2443	0.0102967	0.159131	3.53093	5512.14
9.36	Unit1	Unit1A	0.921148	1.87583	1.09252	69.9542	0.127601	0.130395	3.44053	5722.85
9.38	Unit1	Unit1A	0.88787	1.82491	1.08456	70.2169	0.0862821	0.115971	3.42618	5818.1
9.4	Unit1	Unit1A	0.892494	1.83123	1.1644	70.2101	0.106359	0.140579	3.39213	5975
9.42	Unit1	Unit1A	0.870651	1.83429	1.19844	70.257	0.0234804	0.0638666	3.36964	5740.18
9.44	Unit1	Unit1A	0.944306	1.87738	1.25128	70.4327	0.101075	0.0851653	3.47413	5417.1
9.46	Unit1	Unit1A	0.888881	1.90793	1.14457	70.5461	0.0771727	0.0743833	3.41817	5176.82
9.48	Unit1	Unit1A	0.909555	1.77823	1.15762	70.3925	0.0733962	0.147721	3.48209	5136.5
9.5	Unit1	Unit1A	0.867223	1.82145	1.09583	70.3793	0.0925532	0.125872	3.4489	5306.53
9.52	Unit1	Unit1A	0.92377	1.74511	0.988025	70.2168	0.122921	0.093122	3.31299	5383.3
9.54	Unit1	Unit1A	0.883605	1.80144	1.09641	70.0823	0.0425611	0.112879	3.44047	5261.05
9.56	Unit1	Unit1A	0.904386	1.93307	1.04259	70.5291	0.0473063	0.133571	3.43131	5064.38
9.58	Unit1	Unit1A	0.833279	1.87604	1.09676	71.1145	0.108	0.148035	3.61004	4933.93
9.6	Unit1	Unit1A	0.866083	1.75874	1.04846	70.8978	0.087983	0.176882	3.3904	4857.98
9.62	Unit1	Unit1A	0.849481	1.80641	1.15897	71.1039	0.125815	0.0909174	3.36425	4813.72
9.64	Unit1	Unit1A	0.875203	1.95153	1.17826	71.0696	0.111122	0.123061	3.2841	4811.33
9.66	Unit1	Unit1A	0.84653	1.84266	1.23148	71.0319	0.0857476	0.121324	3.543	4827.31
9.68	Unit1	Unit1A	0.868678	1.81111	1.30575	71.3445	0.102894	0.122016	3.52987	4833.84
9.7	Unit1	Unit1A	0.878588	1.90803	1.15652	70.8502	0.112452	0.044798	3.58456	4818.88
9.72	Unit1	Unit1A	0.836036	2.02985	1.15034	71.0286	0.0652162	0.0769914	3.40929	4877.4
9.74	Unit1	Unit1A	0.919466	1.98226	1.17908	71.3532	0.121694	0.11899	3.49347	4972.34
9.76	Unit1	Unit1A	0.919769	2.0627	1.23961	71.1014	0.076798	0.102096	3.52462	5020.89
9.78	Unit1	Unit1A	0.895506	1.92257	1.21669	70.8203	0.0771206	0.145168	3.53358	4965.92
9.8	Unit1	Unit1A	0.876532	1.93726	1.24312	71.6479	0.0326658	0.078035	3.33279	4906.17
9.82	Unit1	Unit1A	0.848215	1.89697	1.2258	71.4335	0.0894285	0.173437	3.45116	4896.01
9.84	Unit1	Unit1A	0.89863	1.83014	1.31689	71.9406	0.0630137	0.159817	3.44023	4902.39
9.86	Unit1	Unit1A	0.831384	1.90211	1.19849	71.6754	0.0854778	0.134965	3.31865	4885.6
9.88	Unit1	Unit1A	0.945591	1.92428	1.20413	71.4194	0.100195	0.123455	3.40956	4838.19
9.9	Unit1	Unit1A	0.899147	2.01904	1.29308	71.4274	0.0825564	0.148063	3.34542	4913.73
9.92	Unit1	Unit1A	0.874519	1.90235	1.21471	71.7741	0.133355	0.153313	3.49211	4973.81
9.94	Unit1	Unit1A	0.903359	1.94272	1.24831	72.085	0.0513375	0.141403	3.4507	4963.64
9.96	Unit1	Unit1A	0.869448	1.95155	1.25796	71.7882	0.104083	0.166891	3.44814	4938.23
9.98	Unit1	Unit1A	0.843596	1.98583	1.33712	71.6687	0.0640592	0.106465	3.45287	4951.2
10	Unit1	Unit1A	0.862483	1.88162	1.3271	71.8318	0.0854473	0.136182	3.48154	4930.13
10.02	Unit1	Unit1A	0.914948	1.99496	1.32494	71.8407	0.116254	0.1837	3.44873	4899.12
10.04	Unit1	Unit1A	0.933931	2.04798	1.46439	71.4255	0.0612414	0.0810548	3.57338	4954.17
10.06	Unit1	Unit1A	0.940314	2.04489	1.47218	71.7018	0.084353	0.160715	3.45533	5027.22
10.08	Unit1	Unit1A	0.920357	1.99484	1.49082	71.4619	0.0779513	0.0930101	3.54521	5048.05
10.1	Unit1	Unit1A	0.92567	2.09991	1.41479	71.4619	0.0962198	0.0917652	3.40041	5116.28
10.12	Unit1	Unit1A	0.911964	2.08601	1.52555	71.3103	0.10979	0.158487	3.46117	5007.3
10.14	Unit1	Unit1A	0.953403	2.12675	1.55028	71.4866	0.0762722	0.0984444	3.57235	4956.32
10.16	Unit1	Unit1A	0.989032	2.14408	1.47737	71.6421	0.110383	0.139524	3.65806	4930.89
10.18	Unit1	Unit1A	0.854051	2.07566	1.48274	71.9317	0.0965838	0.0590234	3.53835	4881.04
10.2	Unit1	Unit1A	0.967121	2.11138	1.48065	71.5339	0.0993066	0.172668	3.36575	4979.34
10.22	Unit1	Unit1A	0.957256	2.10525	1.49932	71.2513	0.0550045	0.107348	3.42023	4959.1
10.24	Unit1	Unit1A	0.93278	2.14868	1.49369	71.4069	0.0860891	0.113602	3.32966	4958.87
10.26	Unit1	Unit1A	0.923725	2.11034	1.51883	71.6238	0.11254	0.103536	3.46341	4968.01
10.28	Unit1	Unit1A	0.907512	1.9967	1.49441	71.469	0.157635	0.131807	3.54768	4952.9
10.3	Unit1	Unit1A	0.97395	2.02489	1.55313	71.4645	0.0635574	0.151285	3.36905	4931.73
10.32	Unit1	Unit1A	0.960973	2.10185	1.57639	71.4736	0.0730304	0.139827	3.40008	4940.46
10.34	Unit1	Unit1A	1.03566	2.1283	1.62428	71.3008	0.115765	0.112203	3.56056	4965.78
10.36	Unit1	Unit1A	0.99539	2.14269	1.62071	71.1381	0.0971543	0.125417	3.36971	4978.58
10.38	Unit1	Unit1A	1.02145	2.01983	1.56279	71.182	0.0949566	0.104719	3.37311	4965.33
10.4	Unit1	Unit1A	0.991184	1.99216	1.60834	71.6929	0.077478	0.157628	3.50294	5009.88
10.42	Unit1	Unit1A	0.950229	2.12549	1.6306	71.4703	0.12658	0.110758	3.57758	4975.34
10.44	Unit1	Unit1A	1.04166	2.145	1.60655	71.1852	0.0960581	0.137478	3.40775	4929.46
10.46	Unit1	Unit1A	0.951236	2.07534	1.6085	71.2743	0.120221	0.100915	3.39182	4906.9
10.48	Unit1	Unit1A	1.10836	2.11238	1.53101	71.1799	0.0999632	0.107855	3.45945	4921.02
10.5	Unit1	Unit1A	0.996049	2.05281	1.71405	71.4287	0.108228	0.130226	3.49577	4909.05
10.52	Unit1	Unit1A	1.1004	2.19288	1.61627	71.3306	0.119724	0.154936	3.60259	4982.75
10.54	Unit1	Unit1A	1.12549	2.11769	1.53596	71.3119	0.0785636	0.13859	3.55243	4951.06
10.56	Unit1	Unit1A	1.11647	2.08738	1.63387	71.6899	0.117149	0.100287	3.44657	4896.93
10.58	Unit1	Unit1A	1.13523	2.15622	1.65591	71.39	0.0672989	0.127514	3.63769	4925.3
10.6	Unit1	Unit1A	1.08323	2.21252	1.61466	71.7926	0.0956573	0.1302	3.48277	4893.55
10.62	Unit1	Unit1A	1.07675	2.20062	1.85857	71.3701	0.107326	0.146592	3.50198	4887.11
10.64	Unit1	Unit1A	1.09502	2.13894	2.02178	71.2864	0.110119	0.0907377	3.42992	4914.52
10.66	Unit1	Unit1A	1.11785	2.20428	1.65627	71.422	0.0837733	0.11257	3.31686	4938.29
10.68	Unit1	Unit1A	1.23239	2.14527	1.76344	71.0143	0.108844	0.143077	3.48879	4921.86
10.7	Unit1	Unit1A	1.21337	2.20825	1.88498	70.6444	0.159395	0.142381	3.48357	4895.43
10.72	Unit1	Unit1A	1.21747	2.31337	1.76814	70.7518	0.125194	0.0916274	3.40472	4867.63
10.74	Unit1	Unit1A	1.31035	2.25861	1.83557	70.7931	0.0761833	0.0833535	3.3013	4860.36
10.76	Unit1	Unit1A	1.17625	2.31424	1.93165	71.165	0.0836366	0.173501	3.21411	4853.92
10.78	Unit1	Unit1A	1.24615	2.14526	2.02633	71.2356	0.099408	0.109171	3.54154	4836.51
10.8	Unit1	Unit1A	1.19066	1.99908	2.28351	71.2367	0.130102	0.124718	3.47469	4897.41
10.82	Unit1	Unit1A	1.28872	2.04446	2.5531	70.7598	0.15241	0.124453	3.14848	5054.45
10.84	Unit1	Unit1A	1.21566	2.14004	2.18242	71.1145	0.110925	0.111827	3.33672	5100.95
10.86	Unit1	Unit1A	1.13582	2.08914	2.01287	71.0308	0.12711	0.120754	3.32691	5045.53
10.88	Unit1	Unit1A	1.18755	2.09773	1.81768	71.6604	0.0682189	0.0906594	3.32332	4950.51
10.9	Unit1	Unit1A	1.12825	2.27396	1.38392	72.4368	0.0488648	0.127397	3.23715	4870.46
10.92	Unit1	Unit1A	1.13724	2.29437	1.38804	72.6431	0.0683208	0.127993	3.27802	4957.72
10.94	Unit1	Unit1A	1.11511	2.19467	1.53393	72.3685	0.0745719	0.104054	3.29121	4979.06
10.96	Unit1	Unit1A	1.18661	2.35235	1.50589	72.4574	0.133972	0.0495872	3.18144	4980.9
10.98	Unit1	Unit1A	1.12807	2.37915	1.58435	72.6385	0.0453669	0.1108	3.3153	5042.42
11	Unit1	Unit1A	1.17099	2.33162	1.8225	72.6134	0.0845666	0.100962	3.06578	5010.53
11.02	Unit1	Unit1A	1.18226	2.43109	1.76357	72.6203	0.0845078	0.140846	3.21915	4947.35
11.04	Unit1	Unit1A	1.21597	2.50636	1.60196	72.8515	0.0761601	0.0926038	3.22141	4955.68
11.06	Unit1	Unit1A	1.10265	2.42738	1.43619	72.961	0.0205782	0.137188	3.10293	4997.6
11.08	Unit1	Unit1A	1.10919	2.21838	1.57916	72.9335	0.0867765	0.115988	3.23477	5046.96
11.1	Unit1	Unit1A	1.01514	1.96753	1.77241	72.3833	0.0567308	0.108304	3.16488	5377.79
11.12	Unit1	Unit1A	0.9455	1.85427	2.0187	72.6024	0.0725962	0.0979612	3.1206	5678
11.14	Unit1	Unit1A	0.943632	1.60275	2.4233	71.2362	0.0677845	0.130218	3.25805	5604
11.16	Unit1	Unit1A	0.863312	1.70334	2.95711	70.3904	0.0752264	0.11284	3.21599	5286.42
11.18	Unit1	Unit1A	0.81598	1.69153	3.21879	70.0885	0.0992896	0.125466	3.32058	5004.62
11.2	Unit1	Unit1A	0.879992	1.64817	2.82816	70.0166	0.0836356	0.0736357	3.26669	5120.45
11.22	Unit1	Unit1A	0.927167	1.7671	2.49373	70.7291	0.0755402	0.1268	3.52068	5154.96
11.24	Unit1	Unit1A	0.992393	1.90172	1.98216	71.3238	0.0620792	0.0673253	3.60614	5253.73
11.26	Unit1	Unit1A	1.03843	1.9521	1.82823	72.0319	0.10191	0.077311	3.4265	5401.66
11.28	Unit1	Unit1A	0.989088	2.1519	1.59668	72.0471	0.119598	0.104758	3.42329	5535.45
11.3	Unit1	Unit1A	1.13594	2.25957	1.24593	72.293	0.024637	0.0651122	3.34748	5571.01
11.32	Unit1	Unit1A	1.06751	2.15886	1.0269	72.5272	0.0626909	0.143924	3.29466	5430.59
11.34	Unit1	Unit1A	1.06995	2.17893	1.02292	73.0979	0.0523439	0.136627	3.31133	5338.54
11.36	Unit1	Unit1A	1.1416	2.19354	0.951629	72.883	0.0683539	0.0754556	3.11195	5266.2
11.38	Unit1	Unit1A	1.13001	2.33631	0.815135	72.7945	0.0603147	0.126838	3.16412	5135.05
11.4	Unit1	Unit1A	1.10491	2.22309	0.714216	73.2222	0.0963485	0.125518	3.00973	4988.22
11.42	Unit1	Unit1A	1.04707	2.17	0.744504	73.5348	0.084683	0.102325	3.04424	4962.35
11.44	Unit1	Unit1A	0.986426	2.10922	0.753544	73.4922	0.0796933	0.123082	3.0764	5053.43
11.46	Unit1	Unit1A	0.99576	2.01735	0.841676	73.1554	0.113114	0.123802	3.11825	5161.18
11.48	Unit1	Unit1A	0.986775	2.01242	0.790657	72.8226	0.089225	0.0874581	3.17974	5210.57
11.5	Unit1	Unit1A	0.957666	2.01092	0.708956	72.5366	0.0557606	0.089394	3.1093	5479.11
11.52	Unit1	Unit1A	0.928967	1.87578	0.703195	72.9118	0.051758	0.11244	3.1821	5464.74
11.54	Unit1	Unit1A	0.908003	1.89011	0.743723	72.3331	0.086604	0.146423	3.25677	5501.29
11.56	Unit1	Unit1A	0.879121	1.89594	0.774085	72.102	0.0882651	0.163291	3.2958	5505.62
11.58	Unit1	Unit1A	0.847672	2.03057	0.773468	72.5462	0.0628552	0.123091	3.48788	5343.5
11.6	Unit1	Unit1A	0.914323	1.90462	0.848827	72.3564	0.0873279	0.127499	3.42219	5261.63
11.62	Unit1	Unit1A	0.828045	1.99601	0.785445	72.8307	0.113601	0.0994009	3.50108	5210.66
11.64	Unit1	Unit1A	0.911735	1.87237	0.788598	72.6314	0.0567651	0.103924	3.33575	5110.3
11.66	Unit1	Unit1A	0.856374	2.02996	0.827537	72.7726	0.0873851	0.111853	3.30962	5006.25
11.68	Unit1	Unit1A	0.939586	1.97137	0.832455	72.8591	0.0869336	0.137864	3.29412	4970.75
11.7	Unit1	Unit1A	0.858193	1.93333	0.80069	73.071	0.0906113	0.137659	3.52025	5004.79
11.72	Unit1	Unit1A	0.881308	1.90994	0.781339	73.0855	0.0894462	0.0999693	3.61993	5027.33
11.74	Unit1	Unit1A	0.876403	1.96622	0.833545	72.5193	0.105833	0.196797	3.4064	4979.71
11.76	Unit1	Unit1A	0.921412	1.98073	0.808102	72.8671	0.103648	0.122972	3.45713	4934
11.78	Unit1	Unit1A	0.972662	2.00259	0.879272	72.8747	0.123345	0.0995568	3.54039	4975.7
11.8	Unit1	Unit1A	0.998684	2.0892	1.13025	72.6346	0.0732898	0.192496	3.42809	5012.79
11.82	Unit1	Unit1A	1.05837	2.07628	1.29151	72.2764	0.103814	0.0985352	3.53419	5031.88
11.84	Unit1	Unit1A	1.07782	1.99063	1.08484	71.9926	0.0912809	0.143943	3.47687	4992.44
11.86	Unit1	Unit1A	1.0436	2.11816	0.908287	71.7821	0.136199	0.153003	3.49896	4934.32
11.88	Unit1	Unit1A	1.06374	2.04754	0.949545	72.3481	0.12034	0.109799	3.47194	4909.61
11.9	Unit1	Unit1A	1.07941	2.13316	1.02544	72.4273	0.138023	0.103517	3.55705	4881.22
11.92	Unit1	Unit1A	1.09086	2.18348	1.00003	72.3185	0.115523	0.140215	3.59548	4802.53
11.94	Unit1	Unit1A	1.09535	2.10207	0.936716	72.152	0.0833031	0.0992547	3.42757	4833.48
11.96	Unit1	Unit1A	1.06624	2.00166	1.3466	71.9457	0.0952322	0.147743	3.61364	4897.58
11.98	Unit1	Unit1A	1.14161	2.15239	1.11457	72.1462	0.0697697	0.0880842	3.37285	4872.2
12	Unit1	Unit1A	1.16505	2.21835	0.847149	73.1753	0.101346	0.0831558	3.55635	4808.07
12.02	Unit1	Unit1A	1.07398	1.9675	0.953379	72.9207	0.127645	0.124124	3.40466	4844.32
12.04	Unit1	Unit1A	1.21352	1.98454	1.35063	72.4149	0.104169	0.133549	3.58607	4854.94
12.06	Unit1	Unit1A	1.45946	2.03091	1.09755	71.9672	0.10794	0.156015	3.35979	4841.94
12.08	Unit1	Unit1A	1.3109	2.02758	1.05688	71.9459	0.0916266	0.117935	3.32572	4841.89
12.1	Unit1	Unit1A	1.30314	1.9726	0.904222	72.5964	0.102711	0.126554	3.44721	4858.73
12.12	Unit1	Unit1A	1.3235	2.20047	0.87786	73.1837	0.123491	0.129755	3.36514	4888.48
12.14	Unit1	Unit1A	1.30678	2.13496	1.41568	72.2299	0.0860207	0.175702	3.35922	4916.51
12.16	Unit1	Unit1A	1.36505	2.24166	1.56006	71.6909	0.0699082	0.219843	3.37076	4931.98
12.18	Unit1	Unit1A	1.30318	2.24686	1.04731	72.7928	0.0843719	0.125641	3.10579	4939.49
12.2	Unit1	Unit1A	1.29987	2.09006	0.930441	73.3756	0.114586	0.104503	3.14199	5048.18
12.22	Unit1	Unit1A	1.29174	2.03945	0.837913	73.5588	0.106948	0.0976481	3	4952.56
12.24	Unit1	Unit1A	1.27139	1.91522	0.909683	73.8796	0.135639	0.0777661	3.18813	4826.66
12.26	Unit1	Unit1A	1.236	2.02287	0.848851	73.8545	0.117671	0.114977	3.01574	4858.67
12.28	Unit1	Unit1A	1.18651	1.9695	0.851579	74.3751	0.108674	0.0783881	3.0422	5186.3
12.3	Unit1	Unit1A	1.26658	1.99982	0.790606	74.7158	0.0717103	0.0618501	3.08365	5562.77
12.32	Unit1	Unit1A	1.17733	2.12129	0.842201	75.0726	0.0894839	0.0473738	3.04455	5614.62
12.34	Unit1	Unit1A	1.20473	2.38933	0.759088	74.8897	0.0858023	0.0577852	3.0474	5734.26
12.36	Unit1	Unit1A	1.14788	2.37274	0.755044	74.668	0.123362	0.0752419	2.99563	5658.24
12.38	Unit1	Unit1A	1.13113	2.35441	0.704238	74.424	0.048688	0.0686849	2.9959	5099.46
12.4	Unit1	Unit1A	1.13353	2.32524	0.692953	74.8236	0.0615958	0.142868	2.93173	5047.78
12.42	Unit1	Unit1A	1.00926	2.24572	0.666368	74.9221	0.0650321	0.161313	2.90907	5576.01
12.44	Unit1	Unit1A	0.938124	2.05998	0.728994	74.4903	0.0829749	0.148169	2.99202	5815.82
12.46	Unit1	Unit1A	0.974281	1.94253	0.730279	73.8634	0.0879439	0.100015	3.20442	5789.57
12.48	Unit1	Unit1A	0.927894	1.83923	0.743187	72.3209	0.0792849	0.119363	3.39741	5753.74
12.5	Unit1	Unit1A	0.977576	1.94278	0.768979	72.0242	0.0256326	0.100763	3.43304	5458.88
12.52	Unit1	Unit1B	1.06804	2.03648	0.772795	72.7396	0.0693648	0.16274	3.61775	5289.91
12.54	Unit1	Unit1B	1.0065	2.12638	0.721294	73.5895	0.0819851	0.086346	3.50033	5104.57
12.56	Unit1	Unit1B	0.999948	2.15028	0.757091	74.2788	0.0406202	0.089883	3.51002	4882
12.58	Unit1	Unit1B	0.999677	2.14229	0.771665	74.2186	0.0859297	0.0808249	3.12307	4680.07
12.6	Unit1	Unit1B	0.957155	2.04912	0.713654	74.0549	0.0808864	0.123015	3.19434	4867.09
12.62	Unit1	Unit1B	0.947097	1.86611	0.703728	73.7306	0.0876469	0.0536093	3.35461	5022.32
12.64	Unit1	Unit1B	0.989213	1.90669	0.772242	72.8405	0.119556	0.123098	3.61437	5176.26
12.66	Unit1	Unit1B	1.08909	2.08071	0.734629	72.3898	0.0779824	0.101909	3.61394	5199.83
12.68	Unit1	Unit1B	1.12148	2.19254	0.734975	73.027	0.107903	0.115863	3.41999	4965.93
12.7	Unit1	Unit1B	1.11203	2.23111	0.728147	73.1827	0.0783616	0.0906882	3.20292	4752.81
12.72	Unit1	Unit1B	1.12505	2.19094	0.665848	73.2486	0.117451	0.116568	3.3048	4782.16
12.74	Unit1	Unit1B	1.14774	2.11278	0.748258	73.1475	0.0279723	0.115386	3.03627	4924.64
12.76	Unit1	Unit1B	0.976676	2.10775	0.709521	71.9973	0.0529105	0.117097	3.04288	5067.01
12.78	Unit1	Unit1B	1.00948	1.9232	0.675622	71.4385	0.0746787	0.127393	3.32009	5116.29
12.8	Unit1	Unit1B	0.905261	1.67951	0.71966	70.5121	0.0873418	0.110087	3.65328	5139.69
12.82	Unit1	Unit1B	0.908339	1.72287	0.698437	70.1297	0.073373	0.108666	3.80718	5062.41
12.84	Unit1	Unit1B	0.931415	1.71968	0.673555	70.2369	0.0458825	0.119295	3.55095	4829.36
12.86	Unit1	Unit1B	0.874654	1.86982	0.69388	70.6671	0.101343	0.111386	3.73901	4620.3
12.88	Unit1	Unit1B	0.895083	1.83616	0.658663	70.6628	0.0432363	0.0956718	3.70634	4653.93
12.9	Unit1	Unit1B	0.867121	1.83778	0.70627	71.3341	0.111857	0.0887459	3.70276	4727.85
12.92	Unit1	Unit1B	0.822169	1.96091	0.653331	72.2454	0.0559736	0.100018	3.65494	4656.4
12.94	Unit1	Unit1B	0.947816	2.15214	0.697672	72.5925	0.0873227	0.0736786	3.38426	4663.38
12.96	Unit1	Unit1B	0.983401	2.15984	0.709323	72.6223	0.0874134	0.108356	3.27298	4741.6
12.98	Unit1	Unit1B	1.03999	2.2292	0.605068	72.9466	0.0891679	0.0955371	3.21952	4816.52
13	Unit1	Unit1B	1.06576	2.41625	0.654272	72.7482	0.0464149	0.0830113	3.03485	4957.98
13.02	Unit1	Unit1B	1.02377	2.21353	0.66658	72.3713	0.10342	0.122539	3.18107	5157.16
13.04	Unit1	Unit1B	0.995366	2.26683	0.654198	73.3616	0.0870506	0.0641888	3.10099	5322.23
13.06	Unit1	Unit1B	1.09171	2.12994	0.684841	72.7256	0.0762884	0.042967	3.23672	5359.89
13.08	Unit1	Unit1B	1.09891	2.22204	0.692538	72.5102	0.0789422	0.100472	3.52749	5207.74
13.1	Unit1	Unit1B	1.13171	2.29575	0.759862	72.0216	0.0916146	0.100596	3.52053	5045.47
13.12	Unit1	Unit1B	1.16594	2.34257	0.712568	72.4593	0.0881803	0.0659125	3.3163	4899.9
13.14	Unit1	Unit1B	1.09518	2.32836	0.682053	72.1393	0.0513088	0.122964	3.41537	4733.37
13.16	Unit1	Unit1B	1.10875	2.0817	0.737081	72.2482	0.0687942	0.146523	3.28985	4651.31
13.18	Unit1	Unit1B	1.03907	2.19834	0.784422	72.2327	0.0747917	0.107736	3.23464	4776.25
13.2	Unit1	Unit1B	0.999663	1.98956	0.679167	72.2083	0.0861166	0.12518	3.29216	4957.18
13.22	Unit1	Unit1B	0.907881	1.87345	0.710863	72.6305	0.104721	0.0825346	3.52097	5220.08
13.24	Unit1	Unit1B	1.04137	1.9884	0.730107	72.7797	0.0855319	0.0987585	3.5041	5338.5
13.26	Unit1	Unit1B	1.04152	1.84115	0.668244	72.5445	0.0495963	0.0669985	3.56265	5213.75
13.28	Unit1	Unit1B	0.958923	1.91611	0.691256	73.1042	0.0900885	0.0554391	3.48851	4843.82
13.3	Unit1	Unit1B	1.04703	2.06608	0.691899	73.3125	0.117212	0.10759	3.51322	4605.49
13.32	Unit1	Unit1B	1.02157	2.04753	0.698601	73.4295	0.0403714	0.108827	3.45035	4636.56
13.34	Unit1	Unit1B	1.02665	2.09575	0.684433	73.5584	0.0727752	0.121292	3.54761	4787.44
13.36	Unit1	Unit1B	1.10624	2.33635	0.682237	74.0296	0.069794	0.121267	3.3915	4908.63
13.38	Unit1	Unit1B	1.08026	2.3764	0.685213	74.724	0.0559357	0.130225	3.19345	4870.1
13.4	Unit1	Unit1B	1.1104	2.37931	0.693463	74.7226	0.0775301	0.111988	3.16491	4781.13
13.42	Unit1	Unit1B	1.08325	2.24797	0.681853	74.7894	0.0643258	0.0977752	3.18176	4771.61
13.44	Unit1	Unit1B	1.0112	2.18993	0.701191	74.5482	0.0518121	0.0595839	3.13408	4726.81
13.46	Unit1	Unit1B	0.952855	2.10744	0.678158	74.3794	0.0892765	0.0841259	3.02999	4684.07
13.48	Unit1	Unit1B	0.951924	2.13156	0.683982	74.4401	0.0701959	0.0787563	3.10447	4727.97
13.5	Unit1	Unit1B	0.932569	2.24653	0.663509	74.4558	0.0644352	0.0905576	3.35868	4848.11
13.52	Unit1	Unit1B	0.959101	2.27536	0.639401	74.4353	0.0749162	0.109761	3.33799	5056.75
13.54	Unit1	Unit1B	1.02971	2.30434	0.640766	74.0408	0.0319089	0.113837	3.17432	5327.49
13.56	Unit1	Unit1B	1.02293	2.30288	0.65895	74.2009	0.07245	0.081075	3.33171	5509.85
13.58	Unit1	Unit1B	0.993809	2.18238	0.664279	74.4348	0.0539074	0.0912948	3.23734	5463.64
13.6	Unit1	Unit1B	0.96792	2.00152	0.681001	74.2862	0.0622235	0.132225	3.09974	5595.8
13.62	Unit1	Unit1B	0.937562	1.98608	0.640811	74.3056	0.063651	0.136764	3.04162	5345.66
13.64	Unit1	Unit1B	0.937732	1.99279	0.643558	73.8608	0.0370952	0.0983454	3.28568	4981.26
13.66	Unit1	Unit1B	0.97909	1.90697	0.695258	73.9309	0.0841948	0.0963466	3.30711	4777.07
13.68	Unit1	Unit1B	0.996468	1.87431	0.658161	73.5672	0.0527232	0.114233	3.36494	4952.11
13.7	Unit1	Unit1B	1.00241	1.84539	0.624527	74.0227	0.0651833	0.104822	3.4698	5073.06
13.72	Unit1	Unit1B	1.01013	2.08454	0.64465	73.6495	0.0466755	0.117129	3.39019	5374.73
13.74	Unit1	Unit1B	1.11172	2.21733	0.631025	73.9401	0.0419518	0.0830296	3.25915	5595.03
13.76	Unit1	Unit1B	1.11172	2.29993	0.654515	73.7638	0.128643	0.118213	3.24197	5696.37
13.78	Unit1	Unit1B	1.21969	2.31373	0.672238	74.0753	0.0219686	0.0702994	3.36603	5727.5
13.8	Unit1	Unit1B	1.1336	2.1995	0.66228	74.2926	0.0633637	0.0703076	3.24164	5672.88
13.82	Unit1	Unit1B	1.05735	2.12947	0.609041	74.3933	0.0443097	0.118159	3.24565	5281.87
13.84	Unit1	Unit1B	1.13365	2.18439	0.651912	74.5021	0.0750528	0.102979	3.06772	4912.98
13.86	Unit1	Unit1B	1.08197	2.2028	0.627769	74.4437	0.0872141	0.0889411	3.11786	4625.9
13.88	Unit1	Unit1B	1.0072	2.25368	0.67982	74.3206	0.0708325	0.101066	3.11959	4397.11
13.9	Unit1	Unit1B	1.0715	2.1781	0.666695	74.3695	0.077881	0.0958535	3.08372	4560.71
13.92	Unit1	Unit1B	0.963835	2.04534	0.636788	74.8581	0.0700813	0.0475861	3.26168	4632.27
13.94	Unit1	Unit1B	0.986978	2.0997	0.657124	74.547	0.0620091	0.117128	3.15146	4937.86
13.96	Unit1	Unit1B	1.05226	2.20819	0.67386	74.0028	0.0967594	0.113174	3.19188	5331.17
13.98	Unit1	Unit1B	0.966179	2.16327	0.616341	74.6276	0.0138894	0.0694469	3.245	5514.6
14	Unit1	Unit1B	0.946534	2.062	0.670498	74.2381	0.0914316	0.0653083	3.21634	5662.66
14.02	Unit1	Unit1B	0.982322	2.2681	0.599971	74.5394	0.094504	0.090169	3.28712	5807.55
14.04	Unit1	Unit1B	1.00869	2.18882	0.664914	74.6654	0.137508	0.0739761	3.18983	5919.3
14.06	Unit1	Unit1B	0.987557	2.09207	0.619092	74.8046	0.0510047	0.0641956	3.09735	5874.99
14.08	Unit1	Unit1B	1.05712	2.21742	0.673271	74.2942	0.0419701	0.0585833	3.25881	5521.99
14.1	Unit1	Unit1B	1.0399	2.09815	0.588986	74.1108	0.124963	0.0926298	3.21028	4781.91
14.12	Unit1	Unit1B	1.07042	2.16689	0.651978	74.2083	0.071188	0.0763968	3.17151	4512.9
14.14	Unit1	Unit1B	1.05133	2.22228	0.637432	74.246	0.0820803	0.0777143	3.28762	4490.59
14.16	Unit1	Unit1B	1.008	2.19816	0.628047	74.7905	0.0832769	0.094554	3.32915	4546.81
14.18	Unit1	Unit1B	0.971488	2.11977	0.621371	74.5775	0.0953289	0.101395	3.25462	4558.83
14.2	Unit1	Unit1B	0.963235	2.08453	0.679417	74.3481	0.0716095	0.135359	3.34024	4818.12
14.22	Unit1	Unit1B	0.87082	1.9847	0.650492	74.4778	0.0874317	0.090929	3.1766	5038.48
14.24	Unit1	Unit1B	0.940006	2.01467	0.640078	74.0829	0.0690795	0.0918145	3.21589	5319.25
14.26	Unit1	Unit1B	0.916702	2.08683	0.623077	73.8273	0.0463157	0.0568023	3.25359	5585.92
14.28	Unit1	Unit1B	0.941475	2.05691	0.608418	73.8415	0.0524498	0.0926614	3.15099	5706.3
14.3	Unit1	Unit1B	0.948029	2.06444	0.63582	73.8007	0.0991002	0.0868223	3.36515	5749.46
14.32	Unit1	Unit1B	0.971648	1.98319	0.666678	73.8533	0.118796	0.145393	3.41091	5741.53
14.34	Unit1	Unit1B	0.957815	1.95569	0.596409	73.7286	0.0311557	0.11127	3.33968	5659.03
14.36	Unit1	Unit1B	0.895327	1.9047	0.639391	73.5551	0.0619634	0.0817199	3.49343	5528.75
14.38	Unit1	Unit1B	0.934797	1.95751	0.591201	73.9297	0.0672839	0.101374	3.54654	5374.97
14.4	Unit1	Unit1B	0.946234	1.97102	0.582916	73.5813	0.0624872	0.0964088	3.29046	4882.58
14.42	Unit1	Unit1B	0.962208	2.04831	0.624893	73.8305	0.0316516	0.125702	3.47955	4709.91
14.44	Unit1	Unit1B	0.916971	2.08492	0.616692	73.6113	0.104873	0.138039	3.53207	4802.26
14.46	Unit1	Unit1B	0.928133	2.07924	0.574645	73.8645	0.0706976	0.116017	3.33156	4939.97
14.48	Unit1	Unit1B	0.921884	2.11001	0.623042	73.7064	0.054335	0.091464	3.35866	4870.07
14.5	Unit1	Unit1B	0.87194	2.01517	0.625147	73.5487	0.0843813	0.0943619	3.24387	5029.83
14.52	Unit1	Unit1B	0.897813	2.16934	0.652624	73.1394	0.0592466	0.0765648	3.27185	5235.65
14.54	Unit1	Unit1B	0.957088	2.09179	0.606462	73.0552	0.0625788	0.109513	3.19312	5350.25
14.56	Unit1	Unit1B	0.97679	2.17313	0.57532	73.624	0.0546644	0.122771	3.22818	5222.15
14.58	Unit1	Unit1B	0.951087	2.09444	0.598168	73.8857	0.0777618	0.082889	3.4481	4761.45
14.6	Unit1	Unit1B	0.885092	2.23458	0.656322	73.9185	0.0976772	0.146516	3.32476	4659.13
14.62	Unit1	Unit1B	0.958672	2.08248	0.610143	74.1576	0.0425883	0.0686628	3.35496	4701.58
14.64	Unit1	Unit1B	0.962614	2.24048	0.593198	74.2359	0.0452891	0.108339	3.45149	4760.24
14.66	Unit1	Unit1B	0.982459	2.33914	0.637705	73.8407	0.0911007	0.080383	3.23074	4798.59
14.68	Unit1	Unit1B	0.9998	2.35017	0.632842	74.191	0.0591867	0.108357	3.43742	4833.19
14.7	Unit1	Unit1B	0.975402	2.23676	0.656129	73.4235	0.090692	0.108275	3.19326	5047.65
14.72	Unit1	Unit1B	0.98349	2.21381	0.583947	73.1221	0.0163275	0.0806769	3.1155	5256.01
14.74	Unit1	Unit1B	0.972126	2.14518	0.596868	72.9834	0.099478	0.180242	3.24621	5407.7
14.76	Unit1	Unit1B	0.919849	2.30653	0.538881	72.9523	0.0651395	0.0730352	3.14728	5526.75
14.78	Unit1	Unit1B	0.926571	2.3125	0.634073	72.7044	0.0304277	0.129563	3.0934	5654.66
14.8	Unit1	Unit1B	0.918447	2.07087	0.623301	72.7388	0.0640777	0.0932039	3.1619	5582.99
14.82	Unit1	Unit1B	0.784408	2.08823	0.582785	73.1861	0.0700878	0.114253	3.17191	5423.89
14.84	Unit1	Unit1B	0.803587	2.12178	0.633653	73.1293	0.0326427	0.0864072	3.15383	5377.05
14.86	Unit1	Unit1B	0.829586	1.94814	0.60377	73.3844	0.0861162	0.102383	3.2571	5413.19
14.88	Unit1	Unit1B	0.826883	2.02639	0.616561	73.4476	0.0653055	0.129651	3.19208	5397.47
14.9	Unit1	Unit1B	0.843611	1.91276	0.561447	73.5045	0.0911752	0.0978934	3.26266	5314.19
14.92	Unit1	Unit1B	0.773808	1.77543	0.572906	73.4666	0.100931	0.104776	3.2558	5046.84
14.94	Unit1	Unit1B	0.708174	1.68497	0.643706	73.0982	0.0820505	0.118192	3.24348	4830.47
14.96	Unit1	Unit1B	0.684938	1.77067	0.625118	73.2066	0.0588229	0.0857419	3.27267	4735.76
14.98	Unit1	Unit1B	0.687317	1.75726	0.610386	72.565	0.0465634	0.168033	3.16663	4750.05
[truncated: 11,412 more rows]

## Sheet: Fig. 7 & S6 EM1 &EM3
Age cal. ka BP	EM 1	St_dev	EM1-St_Dev	EM1+St_Dev	LogEM1	Log_StDev	LogEM1-StDev	LogEM1+StDev	EM 3	St_dev	EM3-St_Dev	EM3+St_Dev	LogEM3	Log_StDev	LogEM3-StDev	LogEM3+StDev
[truncated: 87 more rows]

[truncated: 5 more sheets: Suppl. Fig. 1 Lakssjøen MS, Suppl Fig 2 - Laks age-depth, Suppl. Fig. 3 - Stratigraphy, Suppl Fig 4 Berg cluster, Suppl. Fig. 7 Berg clr PCA]
